# Supplementary material for: Control of spinal motor neuron terminal differentiation through sustained Hoxc8 gene activity
Source: eLife. 2022 Mar 22;11:e70766. doi: 10.7554/eLife.70766 (PMC8940177; doi:10.7554/eLife.70766)
Supplement: Supplementary file 1. [file elife-70766-supp1.xlsx]

## Sheet: Embryonically enriched genes
NCBI GeneID	Base mean	log2(FC)	StdErr	Wald-Stats	P-value	P-adj	Fold change
170729	4574.67	13.5003	1.01185	13.3421	1.31672e-40	8.15766e-39	11587.3
18504	4697.63	13.4937	1.03203	13.0749	4.58204e-39	2.60222e-37	11535
545474	3975.64	13.2961	1.01875	13.0514	6.23805e-39	3.50617e-37	10058.3
13593	5182.61	12.7746	0.955827	13.365	9.68854e-41	6.07149e-39	7007.05
75426	2585.25	12.698	1.02662	12.3687	3.85835e-35	1.77767e-33	6644.94
240726	2548.53	12.6386	1.04678	12.0738	1.4523e-33	5.89425e-32	6376.88
15417	6458.53	12.5056	0.776636	16.1022	2.46005e-58	3.43903e-56	5815.09
21367	2085.32	12.3425	1.05976	11.6465	2.39046e-31	8.4812e-30	5193.55
320563	2410.25	12.188	1.20796	10.0898	6.1308e-24	1.34779e-22	4666.17
12801	2814.08	12.1494	0.917647	13.2397	5.1768e-40	3.10153e-38	4542.76
15416	6027.21	12.1488	0.688858	17.6362	1.29966e-69	3.03674e-67	4541.11
18155	1714.16	12.0572	1.07074	11.2606	2.05252e-29	6.48089e-28	4261.79
16873	2551.2	12.0455	0.884397	13.62	3.04484e-42	2.10132e-40	4227.24
18072	1379.4	11.8469	1.02679	11.5378	8.5097e-31	2.91792e-29	3683.48
22348	1332.8	11.7697	1.04382	11.2756	1.73239e-29	5.50195e-28	3491.62
26380	1181.24	11.6032	1.04566	11.0965	1.30521e-28	3.96066e-27	3111.02
18420	1196.98	11.5877	1.06391	10.8916	1.26398e-27	3.55217e-26	3077.73
13798	1083.22	11.48	1.04911	10.9427	7.20619e-28	2.06057e-26	2856.45
268755	1665.7	11.4224	0.903013	12.6493	1.12938e-36	5.68371e-35	2744.72
27385	1007.47	11.4013	1.03802	10.9838	4.57411e-28	1.32885e-26	2704.85
140743	1005.06	11.4005	1.03668	10.9972	3.94306e-28	1.15166e-26	2703.36
100045469	983.832	11.3373	1.05628	10.7332	7.11185e-27	1.90691e-25	2587.34
66797	906.967	11.2256	1.05733	10.6169	2.48656e-26	6.50723e-25	2394.61
237213	805.295	11.0831	1.04675	10.5881	3.38226e-26	8.76706e-25	2169.49	Glra2
22784	758.323	10.977	1.06145	10.3415	4.57176e-25	1.07902e-23	2015.61
210801	750.668	10.9598	1.06339	10.3065	6.58579e-25	1.53225e-23	1991.77
67792	1150.82	10.9442	0.894457	12.2356	2.00685e-34	8.63791e-33	1970.29
77630	711.47	10.9194	1.04444	10.4549	1.39193e-25	3.4652e-24	1936.78
104245	765.852	10.8991	1.11188	9.80244	1.09898e-22	2.23291e-21	1909.66
20745	3131.36	10.886	0.645997	16.8514	1.024e-63	1.65828e-61	1892.36
217154	1000.48	10.7515	0.89355	12.0324	2.40117e-33	9.62588e-32	1723.99
381983	8555.45	10.7169	0.39176	27.3557	9.22588e-165	5.02995e-161	1683.08
330953	624.5	10.6856	1.07869	9.90608	3.91709e-23	8.17192e-22	1646.98
269437	1288.12	10.6085	0.826229	12.8396	9.83578e-38	5.20628e-36	1561.23
21419	1054.65	10.5999	1.00683	10.528	6.41791e-26	1.63507e-24	1551.99
94253	1570.89	10.5977	0.923007	11.4818	1.62933e-30	5.51747e-29	1549.67
381373	580.889	10.5915	1.07684	9.83572	7.8998e-23	1.62163e-21	1542.97
77521	2381.68	10.5608	0.642456	16.4381	1.01992e-60	1.53044e-58	1510.48
240888	545.857	10.4634	1.1026	9.48973	2.31638e-21	4.29554e-20	1411.86
68955	1917.03	10.4563	0.701896	14.8973	3.43297e-50	3.59934e-48	1404.99
22691	501.64	10.4415	1.0474	9.96898	2.08368e-23	4.41458e-22	1390.63
329628	2247.77	10.3947	0.72065	14.424	3.65554e-47	3.35899e-45	1346.18
211961	2335.87	10.3538	0.739215	14.0064	1.42378e-44	1.12499e-42	1308.56
80892	6292.76	10.3061	0.666534	15.4623	6.23589e-54	7.78582e-52	1266.06
94191	447.158	10.2004	1.1001	9.27223	1.8229e-20	3.19222e-19	1176.62
18071	416.122	10.1878	1.04756	9.72532	2.35171e-22	4.66803e-21	1166.38
243547	661.996	10.1768	0.895807	11.3605	6.57426e-30	2.15488e-28	1157.54
268515	3418.13	10.1353	0.578695	17.514	1.11973e-68	2.4419e-66	1124.67
70593	386.674	10.0806	1.05273	9.57569	1.01176e-21	1.92423e-20	1082.84
18053	2969.25	10.0762	0.706854	14.255	4.17212e-46	3.59154e-44	1079.55	Ngfr
15436	899.066	10.0624	0.819103	12.2846	1.09528e-34	4.85486e-33	1069.25
319586	3636.42	10.0356	0.580127	17.2989	4.79488e-67	9.01438e-65	1049.55
210573	1088.29	10.0317	0.719581	13.941	3.56711e-44	2.72634e-42	1046.76
26938	375.198	10.023	1.06354	9.4242	4.33406e-21	7.94707e-20	1040.49
229706	828.464	9.99209	0.8257	12.1013	1.03896e-33	4.313e-32	1018.4
14417	1068.12	9.98076	0.771895	12.9302	3.04023e-38	1.65202e-36	1010.44
21418	336.831	9.88106	1.06103	9.31267	1.24661e-20	2.20427e-19	942.967
319807	1007.07	9.87744	0.763505	12.937	2.78437e-38	1.51804e-36	940.599
269610	1449.83	9.80976	0.679902	14.4282	3.4393e-47	3.17814e-45	897.495
228787	340.406	9.8018	1.12008	8.75095	2.11569e-18	3.09796e-17	892.554
192663	495.393	9.77363	0.897276	10.8926	1.2508e-27	3.52118e-26	875.299
140486	675.466	9.71707	0.811155	11.9793	4.5614e-33	1.78912e-31	841.649
330671	1840.43	9.71209	0.789363	12.3037	8.65053e-35	3.86579e-33	838.745
11922	307.819	9.65458	1.12784	8.56021	1.12665e-17	1.53052e-16	805.97
104080	789.591	9.65033	0.892679	10.8105	3.06882e-27	8.45009e-26	803.6
12291	1093.52	9.6492	0.69721	13.8397	1.46737e-43	1.05728e-41	802.971
17933	4423.45	9.62406	0.53851	17.8716	1.96175e-71	4.93636e-69	789.095
18997	277.465	9.61851	1.06097	9.06574	1.23766e-19	2.0239e-18	786.07
211383	626.943	9.59526	0.794351	12.0794	1.35755e-33	5.5372e-32	773.501
71951	12816.9	9.59429	0.287913	33.3236	1.75729e-243	2.87422e-239	772.983
211134	277.589	9.59416	1.07794	8.90042	5.56354e-19	8.62533e-18	772.913
26381	2977.73	9.59008	0.675648	14.1939	9.99257e-46	8.38146e-44	770.73
56523	273.279	9.55089	1.09279	8.73991	2.33304e-18	3.39495e-17	750.077
217733	262.045	9.53332	1.06634	8.94019	3.88493e-19	6.0864e-18	740.995
18183	258.989	9.50145	1.07731	8.8196	1.14873e-18	1.72849e-17	724.805
268935	606.508	9.49346	0.859372	11.047	2.26736e-28	6.74272e-27	720.8
64290	260.469	9.49199	1.08906	8.71579	2.88743e-18	4.16096e-17	720.068
100040724	251.711	9.45458	1.08342	8.72663	2.62371e-18	3.79765e-17	701.636
22255	249.437	9.4414	1.08394	8.71023	3.03262e-18	4.3625e-17	695.254
20265	246.064	9.43727	1.07389	8.7879	1.52379e-18	2.27193e-17	693.267
668225	389.632	9.43577	0.895097	10.5416	5.55378e-26	1.41712e-24	692.547
338346	241.478	9.4126	1.07336	8.76933	1.79738e-18	2.64846e-17	681.515
434437	235.959	9.39649	1.0629	8.8404	9.5376e-19	1.44844e-17	673.945
19289	370.363	9.36575	0.894874	10.466	1.23768e-25	3.08589e-24	659.739
170788	232.761	9.34991	1.0824	8.6381	5.71546e-18	7.97629e-17	652.536
330319	360.95	9.3281	0.8962	10.4085	2.26748e-25	5.45395e-24	642.744
76373	222.444	9.31548	1.06361	8.75833	1.98171e-18	2.90699e-17	637.145
80883	232.685	9.30044	1.11524	8.3394	7.46671e-17	9.45976e-16	630.54
380669	219.416	9.28451	1.07238	8.65787	4.80669e-18	6.795e-17	623.614
72608	214.901	9.27421	1.05979	8.75099	2.11497e-18	3.09796e-17	619.176
18131	511.967	9.25379	0.862924	10.7238	7.87334e-27	2.10076e-25	610.476
12903	2321.07	9.2484	0.769513	12.0185	2.84049e-33	1.13315e-31	608.197
210094	2624.57	9.24727	0.635391	14.5537	5.53488e-48	5.32521e-46	607.724
68404	216.984	9.24522	1.0895	8.48571	2.14404e-17	2.83721e-16	606.861
15285	2337.63	9.23884	0.721416	12.8065	1.50718e-37	7.90113e-36	604.181
57138	2114.18	9.22079	0.486567	18.9507	4.35603e-80	1.65691e-77	596.668
70771	467.477	9.18417	0.836756	10.9759	4.98921e-28	1.44176e-26	581.714
14955	1197.69	9.17871	0.726012	12.6426	1.22853e-36	6.14491e-35	579.519
16322	198.37	9.15916	1.06468	8.60271	7.78566e-18	1.07281e-16	571.718
14812	497.272	9.1334	0.887154	10.2952	7.40869e-25	1.71395e-23	561.602
16871	268.68	9.12817	1.31008	6.96764	3.2231e-12	2.58797e-11	559.569
320158	193.051	9.11321	1.07097	8.5093	1.74993e-17	2.32888e-16	553.797
207667	198.643	9.08702	1.11629	8.14038	3.94029e-16	4.6566e-15	543.832
53626	188.638	9.08543	1.06853	8.50269	1.8524e-17	2.46124e-16	543.233
110834	685.278	9.056	0.654067	13.8457	1.35092e-43	9.78602e-42	532.266
333050	421.207	9.05175	1.07393	8.4286	3.49818e-17	4.56269e-16	530.7
233057	178.919	9.02847	1.05611	8.5488	1.24374e-17	1.67705e-16	522.204
110876	883.064	8.99968	0.71295	12.6231	1.57402e-36	7.82511e-35	511.885
195727	186.708	8.98988	1.12552	7.9873	1.37924e-15	1.52734e-14	508.421
246086	186.379	8.98941	1.12441	7.99476	1.29826e-15	1.44157e-14	508.254
54524	424.579	8.97672	0.836156	10.7357	6.91939e-27	1.85835e-25	503.803
100503019	183.879	8.97634	1.12118	8.00618	1.18325e-15	1.32104e-14	503.673
16392	313.138	8.93882	1.07061	8.34924	6.87025e-17	8.73793e-16	490.742
140489	173.617	8.93328	1.09788	8.13687	4.05636e-16	4.77996e-15	488.862
72184	165.472	8.88996	1.08238	8.21332	2.1516e-16	2.60486e-15	474.401
20562	3041.07	8.84364	0.637647	13.8692	9.73685e-44	7.14152e-42	459.411
320707	158.797	8.82216	1.09068	8.0887	6.03035e-16	6.9952e-15	452.621
14472	1419.01	8.80698	0.717046	12.2823	1.12726e-34	4.98312e-33	447.884
14013	345.836	8.79579	1.07252	8.20107	2.38247e-16	2.87372e-15	444.424
15410	2546.2	8.77453	0.480978	18.2431	2.34807e-74	6.85804e-72	437.921
20350	1034.22	8.76791	0.752154	11.6571	2.11192e-31	7.55855e-30	435.916
231760	477.692	8.759	0.774724	11.306	1.22608e-29	3.93211e-28	433.232
170571	150.962	8.75817	1.08727	8.0552	7.93476e-16	9.0883e-15	432.983
235281	1815.42	8.7524	0.48214	18.1532	1.21036e-73	3.41321e-71	431.256
382571	147.142	8.74266	1.07102	8.16291	3.27052e-16	3.90457e-15	428.354
241134	359.566	8.71386	0.906812	9.60933	7.30248e-22	1.39695e-20	419.887	Nyap2
223604	157.403	8.683	1.17716	7.37623	1.62829e-13	1.49704e-12	411
13842	142.721	8.67692	1.09136	7.95059	1.85632e-15	2.02278e-14	409.273
12395	4970.52	8.67638	0.547095	15.859	1.21833e-56	1.62008e-54	409.121
11831	155.644	8.66775	1.17749	7.36123	1.82227e-13	1.66416e-12	406.681
16353	140.553	8.66716	1.08242	8.0072	1.17353e-15	1.31108e-14	406.512
16872	165.843	8.65807	1.23319	7.02087	2.20496e-12	1.79782e-11	403.96
209692	145.486	8.65637	1.12513	7.69365	1.42997e-14	1.43753e-13	403.485
268934	138.461	8.65382	1.0761	8.04184	8.84977e-16	1.00588e-14	402.772
433809	136.113	8.63759	1.07092	8.06554	7.29107e-16	8.38038e-15	398.266
330166	16235.7	8.63654	0.468904	18.4186	9.32675e-76	2.99114e-73	397.977
19876	4618.29	8.61784	0.527796	16.328	6.24233e-60	8.9561e-58	392.852
381405	134.329	8.61652	1.07255	8.03367	9.45961e-16	1.07148e-14	392.491
215627	132.925	8.61319	1.06358	8.09827	5.57451e-16	6.48482e-15	391.587
225631	1412.98	8.60891	0.755058	11.4017	4.10222e-30	1.35822e-28	390.428
244682	143.538	8.60509	1.14803	7.49553	6.6031e-14	6.2974e-13	389.396
241494	132.983	8.60254	1.07309	8.01662	1.08695e-15	1.21935e-14	388.707
108832	132.298	8.59835	1.07143	8.02509	1.01455e-15	1.1452e-14	387.58
14561	415.504	8.58758	0.757339	11.3392	8.39538e-30	2.71373e-28	384.698
381359	129.113	8.56673	1.06959	8.00938	1.1529e-15	1.29068e-14	379.177
545622	245.097	8.56672	0.987868	8.67193	4.24872e-18	6.02706e-17	379.175
228598	395.753	8.56088	0.731611	11.7014	1.25357e-31	4.56646e-30	377.642
15400	771.467	8.55805	0.611176	14.0026	1.50286e-44	1.18177e-42	376.903
215890	127.967	8.55056	1.07257	7.97203	1.56095e-15	1.71348e-14	374.953
100038486	132.159	8.53886	1.11707	7.64399	2.10592e-14	2.08881e-13	371.922
20666	17788.9	8.53874	0.519538	16.4352	1.06992e-60	1.59087e-58	371.893
100504395	130.164	8.53784	1.1026	7.74335	9.68341e-15	9.91125e-14	371.66
19649	1874.49	8.53567	0.485806	17.5701	4.17196e-69	9.22116e-67	371.103
382018	3084.88	8.51416	0.689301	12.3519	4.75825e-35	2.16785e-33	365.61
53422	125.056	8.5137	1.07803	7.89748	2.84589e-15	3.0563e-14	365.493
15372	126.467	8.49745	1.1044	7.69421	1.42376e-14	1.43304e-13	361.4
16514	123.749	8.49217	1.08404	7.83382	4.73269e-15	4.99083e-14	360.08
12677	159.837	8.491	1.29782	6.54252	6.04906e-11	4.20299e-10	359.788
381270	1935.44	8.47003	0.632238	13.3969	6.30339e-41	4.04307e-39	354.596
100038356	120.205	8.46756	1.071	7.90623	2.6531e-15	2.85488e-14	353.988
239556	121.595	8.46377	1.08725	7.78456	6.99569e-15	7.25104e-14	353.06
76161	4562.72	8.45731	0.945796	8.942	3.8218e-19	5.99323e-18	351.483
72640	5505.01	8.4554	0.342181	24.7103	8.281e-135	1.1287e-131	351.018
330119	194.895	8.43131	0.948072	8.89311	5.94222e-19	9.17761e-18	345.206
14028	350.302	8.42316	0.745072	11.3052	1.23733e-29	3.96043e-28	343.26
320916	604.258	8.41248	0.576618	14.5894	3.28254e-48	3.19578e-46	340.73
20606	116.115	8.41045	1.07965	7.78995	6.70378e-15	6.97057e-14	340.25
100502768	124.371	8.40524	1.15402	7.28342	3.25463e-13	2.89939e-12	339.023
13592	193.776	8.39863	0.972165	8.6391	5.66588e-18	7.91385e-17	337.473
15379	119.424	8.38912	1.12706	7.44334	9.81717e-14	9.17017e-13	335.256
244484	113.878	8.38785	1.07518	7.80132	6.12633e-15	6.37419e-14	334.962
23893	113.976	8.38415	1.07943	7.7672	8.02373e-15	8.27988e-14	334.103
231470	283.455	8.37597	0.873021	9.59424	8.45346e-22	1.61148e-20	332.215
15373	111.943	8.37178	1.06942	7.82836	4.94261e-15	5.20549e-14	331.251
17240	118.449	8.36452	1.13718	7.35548	1.90236e-13	1.73439e-12	329.589
24004	255.667	8.35518	0.813168	10.2749	9.14807e-25	2.10741e-23	327.462
244310	112.217	8.33005	1.108	7.51806	5.55934e-14	5.33619e-13	321.807
239845	202.013	8.32742	0.978534	8.5101	1.73784e-17	2.31655e-16	321.22
12904	995.583	8.30448	0.733053	11.3286	9.46756e-30	3.05427e-28	316.153
76798	115.228	8.30265	1.15465	7.19062	6.44994e-13	5.60548e-12	315.752
330941	109.896	8.29677	1.11195	7.46145	8.55725e-14	8.03458e-13	314.469
20980	108.389	8.27917	1.11126	7.45024	9.31676e-14	8.71269e-13	310.654
18996	390.495	8.27597	0.691639	11.9657	5.37136e-33	2.09675e-31	309.968
320145	104.901	8.26896	1.08205	7.64194	2.13966e-14	2.12098e-13	308.464
140477	244.138	8.26337	0.856964	9.64261	5.28256e-22	1.01769e-20	307.272
20743	9854.43	8.25761	0.917019	9.00484	2.15974e-19	3.45982e-18	306.047
20927	239.896	8.25419	0.832881	9.91041	3.75096e-23	7.83535e-22	305.323
70530	167.587	8.24693	0.910703	9.05557	1.35857e-19	2.21102e-18	303.79
378435	103.889	8.23396	1.10119	7.47735	7.58355e-14	7.19053e-13	301.071
13865	1681.7	8.22487	0.393631	20.8949	5.96378e-97	3.14657e-94	299.18
13642	1007.94	8.2194	0.614938	13.3662	9.52428e-41	5.99151e-39	298.049
270049	191.047	8.21818	0.992225	8.28257	1.20542e-16	1.50044e-15	297.795
75729	303.06	8.21203	0.763418	10.7569	5.49697e-27	1.49598e-25	296.53
11444	3072.31	8.20326	0.315606	25.9921	6.08578e-149	1.99078e-145	294.732
380728	365.062	8.18457	0.657801	12.4423	1.5397e-35	7.19526e-34	290.939
13803	6817.7	8.17916	0.390901	20.9239	3.24733e-97	1.77044e-94	289.85
18508	438.917	8.17557	0.761087	10.742	6.46588e-27	1.73941e-25	289.128
20741	226.109	8.15941	0.821146	9.9366	2.88493e-23	6.06502e-22	285.908
13386	984.281	8.15448	0.697551	11.6902	1.43112e-31	5.20163e-30	284.933
77018	170.117	8.15221	0.985331	8.27358	1.29999e-16	1.6108e-15	284.486
192163	97.8112	8.15136	1.10131	7.40153	1.34625e-13	1.24263e-12	284.318
104010	276.377	8.12253	0.928476	8.74825	2.16696e-18	3.16737e-17	278.693
234290	151.573	8.10849	0.923032	8.78462	1.56897e-18	2.3308e-17	275.993
239731	93.999	8.10539	1.0942	7.40761	1.28595e-13	1.1883e-12	275.401
636808	98.4159	8.10477	1.14546	7.07558	1.48826e-12	1.23752e-11	275.283
70737	150.605	8.10072	0.921159	8.79406	1.44254e-18	2.15276e-17	274.511
330301	149.61	8.09789	0.914473	8.85525	8.34957e-19	1.27631e-17	273.973
245683	95.8164	8.09405	1.12647	7.18531	6.70569e-13	5.80615e-12	273.244
105732	91.3935	8.09118	1.07275	7.54243	4.61283e-14	4.46434e-13	272.701
232174	108.359	8.08887	1.24137	6.51608	7.21672e-11	4.97415e-10	272.266
320865	94.0081	8.08499	1.11231	7.26864	3.63118e-13	3.21905e-12	271.535
12723	92.6325	8.07391	1.10417	7.3122	2.62806e-13	2.36699e-12	269.458
15425	2799.71	8.06445	0.371638	21.6998	2.06225e-104	1.6062e-101	267.695
26424	337.205	8.05247	0.762685	10.5581	4.66199e-26	1.1933e-24	265.482
11923	90.8918	8.05149	1.10129	7.31098	2.65195e-13	2.38719e-12	265.302
64177	88.5078	8.0447	1.07514	7.48246	7.29428e-14	6.92428e-13	264.055
235599	141.708	8.02582	0.912041	8.79984	1.37005e-18	2.05019e-17	260.622
18211	97.26	8.02305	1.19258	6.7275	1.72607e-11	1.28209e-10	260.123
171463	88.7166	8.00165	1.11586	7.17082	7.45515e-13	6.42447e-12	256.293
382253	91.3569	7.98599	1.15982	6.88556	5.75604e-12	4.48741e-11	253.526
71726	5092.52	7.96589	0.746961	10.6644	1.49372e-26	3.9469e-25	250.018
432989	84.8258	7.9585	1.10124	7.22687	4.94264e-13	4.3254e-12	248.741
12939	86.1459	7.95839	1.1189	7.11272	1.1378e-12	9.59274e-12	248.723
432939	136.881	7.95821	0.917291	8.67577	4.1077e-18	5.83715e-17	248.691
268595	5615.24	7.93807	0.519479	15.2808	1.026e-52	1.22865e-50	245.244
216459	366.575	7.93498	0.664786	11.9361	7.67075e-33	2.95206e-31	244.718
19699	15244.5	7.93143	0.531162	14.9322	2.03313e-50	2.20224e-48	244.118
54422	271.985	7.92697	0.999006	7.93486	2.10733e-15	2.28716e-14	243.364
672284	89.3786	7.91315	1.19142	6.64175	3.09972e-11	2.23837e-10	241.043
664805	87.8533	7.90774	1.17902	6.70707	1.98566e-11	1.46097e-10	240.142
22762	138.577	7.90011	0.966788	8.1715	3.04571e-16	3.6415e-15	238.875
432839	81.9469	7.89064	1.11887	7.05235	1.75919e-12	1.44953e-11	237.311
213119	78.1491	7.87754	1.07258	7.34448	2.06558e-13	1.87588e-12	235.167
268958	84.2789	7.87697	1.16148	6.78182	1.18671e-11	8.94053e-11	235.073
13840	131.396	7.86491	0.9413	8.35537	6.52306e-17	8.30282e-16	233.116
240590	84.5222	7.83814	1.19194	6.57597	4.83358e-11	3.40914e-10	228.832
213409	76.8286	7.83696	1.09007	7.18944	6.50591e-13	5.6497e-12	228.645
238205	437.28	7.82813	0.652724	11.993	3.86558e-33	1.51984e-31	227.25
106565	234.116	7.82338	0.742064	10.5427	5.48884e-26	1.40274e-24	226.501
102075	75.9974	7.81753	1.09341	7.14966	8.69922e-13	7.45726e-12	225.586
93709	77.0416	7.81052	1.11553	7.00162	2.53014e-12	2.05069e-11	224.492
57265	234.251	7.80846	0.739261	10.5625	4.44577e-26	1.14152e-24	224.171
791267	77.5509	7.8059	1.12785	6.92107	4.48239e-12	3.53618e-11	223.774
243328	1840.93	7.80583	0.413785	18.8644	2.23628e-79	8.12813e-77	223.763
215654	127.036	7.80412	0.951149	8.20494	2.30701e-16	2.78476e-15	223.498
17690	1772	7.79925	0.569136	13.7037	9.65227e-43	6.86402e-41	222.745
17263	22675.7	7.79578	0.288526	27.0193	8.76875e-161	3.58554e-157	222.21
237397	74.2402	7.79549	1.08365	7.19374	6.3039e-13	5.4844e-12	222.166
239659	82.4263	7.7868	1.20474	6.46346	1.02334e-10	6.93075e-10	220.831
12570	862.572	7.78543	0.449639	17.3149	3.63402e-67	6.9114e-65	220.621
279067	75.3755	7.78164	1.11626	6.9712	3.1426e-12	2.52706e-11	220.042
319764	103.211	7.75566	1.3896	5.5812	2.38867e-08	1.20361e-07	216.116
268859	3324.2	7.75208	0.576214	13.4535	2.93704e-41	1.90628e-39	215.581
329872	158.725	7.7316	1.08416	7.13143	9.93297e-13	8.43205e-12	212.541
50765	70.2326	7.72973	1.07453	7.1936	6.31061e-13	5.48731e-12	212.266
329934	215.195	7.7166	0.750146	10.2868	8.08231e-25	1.86452e-23	210.343
623279	79.4389	7.70633	1.2261	6.28525	3.27325e-10	2.0856e-09	208.851
60367	68.8152	7.6993	1.07719	7.14755	8.83386e-13	7.56474e-12	207.835
432582	112.98	7.69875	0.913984	8.42329	3.66049e-17	4.7706e-16	207.757
381634	72.2686	7.69218	1.14378	6.72524	1.75298e-11	1.3003e-10	206.813
83398	169.316	7.68274	0.857554	8.9589	3.27923e-19	5.17713e-18	205.464
14813	78.2115	7.68214	1.22887	6.25137	4.06876e-10	2.56512e-09	205.378
108068	109.772	7.66322	0.921432	8.31664	9.04891e-17	1.13849e-15	202.703
12937	68.5094	7.65867	1.10907	6.90551	5.00235e-12	3.92603e-11	202.064
227733	66.611	7.65331	1.08013	7.08554	1.38501e-12	1.15696e-11	201.315
228942	67.1757	7.65169	1.09033	7.01779	2.25409e-12	1.83605e-11	201.089
19782	73.8548	7.64156	1.20531	6.3399	2.29909e-10	1.49459e-09	199.682
64176	416.969	7.62501	0.892381	8.54457	1.29016e-17	1.7382e-16	197.404
237979	206.624	7.60933	0.825802	9.21447	3.12815e-20	5.35189e-19	195.27
240057	1475.34	7.59395	0.526785	14.4156	4.12558e-47	3.76972e-45	193.2
14029	65.2203	7.58316	1.11722	6.78751	1.14083e-11	8.59885e-11	191.76
18013	369.474	7.57477	0.667403	11.3496	7.4485e-30	2.42202e-28	190.648
78784	5803.63	7.5747	0.532706	14.2193	6.95349e-46	5.86244e-44	190.64
93890	107.507	7.54625	0.970676	7.77422	7.59125e-15	7.8435e-14	186.917
211468	192.246	7.53432	0.736437	10.2308	1.44362e-24	3.28398e-23	185.377
329502	79.0448	7.5304	1.33101	5.65764	1.53464e-08	7.93319e-08	184.874
330427	61.2409	7.52934	1.08786	6.92126	4.47641e-12	3.5336e-11	184.739
17932	3317.41	7.52838	0.363168	20.7297	1.86831e-95	9.26001e-93	184.616
54525	1565.8	7.5268	0.722043	10.4243	1.92055e-25	4.66061e-24	184.414
53419	78.0806	7.5156	1.33046	5.64889	1.61489e-08	8.32174e-08	182.988
545758	62.4545	7.51415	1.12746	6.66466	2.65285e-11	1.93188e-10	182.804
15569	2573.03	7.51094	0.47496	15.8138	2.49856e-56	3.29569e-54	182.397
14654	145.139	7.50727	0.904432	8.30053	1.03645e-16	1.30101e-15	181.933
100503944	320.491	7.50124	0.607104	12.3558	4.53412e-35	2.07151e-33	181.175
319415	223.474	7.46546	0.671496	11.1177	1.02939e-28	3.14706e-27	176.737
67071	739.324	7.46426	0.534865	13.9554	2.91606e-44	2.23921e-42	176.59
11722	96.8485	7.45507	0.935613	7.96811	1.61118e-15	1.76507e-14	175.468
104360	81.678	7.43534	1.40427	5.29482	1.19131e-07	5.4519e-07	173.085
17202	57.836	7.43408	1.10492	6.72814	1.71843e-11	1.27699e-10	172.935
239102	4648.02	7.42166	0.504615	14.7076	5.76553e-49	5.75007e-47	171.452
11733	470.793	7.41526	0.593047	12.5037	7.12899e-36	3.42946e-34	170.693
100046763	57.3336	7.41311	1.11217	6.66545	2.6386e-11	1.92322e-10	170.439
70571	296.482	7.41049	0.571677	12.9627	1.99034e-38	1.09242e-36	170.13
54376	57.2102	7.39925	1.12295	6.58914	4.42379e-11	3.1418e-10	168.81
56739	893.131	7.3951	0.5476	13.5046	1.46988e-41	9.77288e-40	168.324
193736	1786.78	7.39082	0.474562	15.574	1.09367e-54	1.40851e-52	167.825
243043	129.62	7.38888	0.81369	9.0807	1.07878e-19	1.77332e-18	167.6
170676	1406.84	7.37875	0.474344	15.5557	1.45617e-54	1.86071e-52	166.427
100415787	54.4593	7.37807	1.07966	6.83371	8.27445e-12	6.3153e-11	166.349
100504258	56.453	7.37669	1.12658	6.54784	5.83763e-11	4.06472e-10	166.19
77580	169.061	7.37634	0.802367	9.19322	3.81242e-20	6.48865e-19	166.15
70363	62.4367	7.35309	1.25174	5.8743	4.24639e-09	2.36078e-08	163.494
72003	241.881	7.34312	0.694567	10.5722	4.00802e-26	1.03399e-24	162.368
100502670	123.946	7.33797	0.817858	8.97218	2.90706e-19	4.62079e-18	161.789
271278	213.148	7.33741	0.699533	10.489	9.70405e-26	2.44184e-24	161.726
18741	60.0916	7.3342	1.23043	5.96068	2.51192e-09	1.43503e-08	161.367
100041293	56.8474	7.33332	1.1747	6.2427	4.30084e-10	2.70244e-09	161.269
192161	90.0996	7.32105	0.958751	7.63604	2.24011e-14	2.21921e-13	159.903
71791	52.224	7.32003	1.08117	6.77047	1.28365e-11	9.6442e-11	159.789
233210	2520.97	7.31815	0.439894	16.6362	3.81276e-62	6.05452e-60	159.581
11924	203.808	7.31808	0.665125	11.0026	3.71393e-28	1.08862e-26	159.574
22658	1381.96	7.31801	0.415212	17.6247	1.59115e-69	3.66547e-67	159.566
20271	54.2696	7.31757	1.1329	6.45918	1.05274e-10	7.11511e-10	159.517
319984	2046.91	7.31451	0.375556	19.4765	1.73838e-84	6.88953e-82	159.179
232035	639.092	7.31184	0.7741	9.4456	3.53367e-21	6.50132e-20	158.885
225872	138.785	7.30982	0.869163	8.41019	4.0936e-17	5.32233e-16	158.663
75209	1233.17	7.30463	0.702616	10.3963	2.5768e-25	6.16172e-24	158.093
73322	53.7983	7.2904	1.14652	6.35875	2.03406e-10	1.32917e-09	156.542
231858	118.762	7.27531	0.803867	9.0504	1.42451e-19	2.30686e-18	154.913
244281	981.14	7.26983	0.85313	8.52136	1.57686e-17	2.11576e-16	154.325
17703	51.4284	7.2688	1.11019	6.54732	5.85774e-11	4.07698e-10	154.215
68203	272.124	7.25991	0.637797	11.3828	5.09419e-30	1.67985e-28	153.267
77318	50.1737	7.25867	1.0862	6.68265	2.34663e-11	1.71423e-10	153.136
269152	2593.1	7.25774	0.976252	7.43429	1.05131e-13	9.80347e-13	153.037
110886	50.0124	7.25668	1.08382	6.69545	2.15004e-11	1.57766e-10	152.925
107585	58.1024	7.2527	1.25659	5.77172	7.84644e-09	4.19674e-08	152.504
94222	58.4422	7.25066	1.26274	5.74199	9.35706e-09	4.9577e-08	152.288
215303	279.531	7.24858	1.06971	6.7762	1.23378e-11	9.28227e-11	152.069
245865	49.2719	7.24032	1.08073	6.69947	2.09177e-11	1.53628e-10	151.201
100503797	49.8977	7.23437	1.10324	6.5574	5.47527e-11	3.82217e-10	150.578
27220	53.15	7.21508	1.19861	6.01954	1.74912e-09	1.0232e-08	148.578
241118	3054.44	7.21466	0.420468	17.1587	5.41563e-66	9.842e-64	148.535
319477	492.234	7.21375	0.519836	13.877	8.73703e-44	6.48303e-42	148.441
75291	48.2461	7.20696	1.0842	6.64726	2.98595e-11	2.16098e-10	147.744
140781	49.4286	7.20267	1.12247	6.4168	1.3917e-10	9.25687e-10	147.305
270109	369.574	7.1953	0.624323	11.525	9.87594e-31	3.37931e-29	146.555
214922	48.0319	7.19378	1.09141	6.59124	4.36159e-11	3.09897e-10	146.401
20669	57.3297	7.19146	1.28591	5.59253	2.23789e-08	1.13427e-07	146.166
231004	47.581	7.1906	1.08075	6.65336	2.86472e-11	2.07692e-10	146.078
15403	761.279	7.19006	0.615781	11.6763	1.68412e-31	6.05395e-30	146.024
12565	47.4668	7.17641	1.09406	6.55944	5.4011e-11	3.772e-10	144.649
78373	48.3378	7.17219	1.12247	6.38967	1.66247e-10	1.0951e-09	144.226
636931	48.0839	7.16508	1.12043	6.39492	1.60631e-10	1.05981e-09	143.517
17116	196.78	7.14178	0.761518	9.37835	6.70145e-21	1.21383e-19	141.218
170677	48.15	7.13652	1.1508	6.20134	5.59837e-10	3.46451e-09	140.704
627191	74.8781	7.12848	0.915792	7.78395	7.02927e-15	7.28124e-14	139.922
225266	373.094	7.12606	0.736618	9.67402	3.88793e-22	7.52556e-21	139.687
380702	120.378	7.12601	0.919904	7.74647	9.44828e-15	9.68878e-14	139.682
14170	74.0108	7.10786	0.918844	7.73566	1.02868e-14	1.05091e-13	137.937
93891	118.805	7.09756	0.86729	8.18361	2.7547e-16	3.3105e-15	136.955
12919	48.8037	7.09484	1.20476	5.88902	3.88503e-09	2.17317e-08	136.697
242466	5742.35	7.09285	0.464557	15.268	1.24968e-52	1.47048e-50	136.509
240753	4146.79	7.07935	0.474675	14.9141	2.66844e-50	2.8341e-48	135.237
15423	1973.84	7.0719	0.478371	14.7833	1.87729e-49	1.91906e-47	134.541
22772	45.4739	7.07074	1.14008	6.202	5.57512e-10	3.45273e-09	134.433
13639	74.0771	7.06959	0.97921	7.21969	5.21064e-13	4.55506e-12	134.326
20191	852.258	7.06388	0.727186	9.714	2.62827e-22	5.16683e-21	133.795
245643	44.8191	7.05922	1.13076	6.24288	4.29595e-10	2.70101e-09	133.364
442796	165.319	7.05844	0.676925	10.4272	1.863e-25	4.5344e-24	133.291
100502829	43.4508	7.05787	1.08975	6.4766	9.38139e-11	6.39342e-10	133.239
210274	922.346	7.05338	0.727511	9.69522	3.15968e-22	6.14503e-21	132.825
791417	43.5399	7.05169	1.09917	6.41549	1.40375e-10	9.33324e-10	132.669
15364	134.05	7.0502	0.801501	8.79624	1.41472e-18	2.1151e-17	132.532
69681	43.5025	7.04975	1.10211	6.39662	1.58858e-10	1.04981e-09	132.491
218772	744.689	7.04935	0.466306	15.1174	1.24279e-51	1.44164e-49	132.454
16497	74.4181	7.04328	1.01397	6.94625	3.75131e-12	2.9834e-11	131.898
20192	257.388	7.03761	0.722196	9.74474	1.9428e-22	3.87387e-21	131.38
13645	42.3822	7.03423	1.08087	6.50794	7.61886e-11	5.23369e-10	131.074
233919	43.3543	7.02794	1.11741	6.28947	3.18548e-10	2.03443e-09	130.503
20604	1257.23	7.02789	0.532671	13.1937	9.53915e-40	5.63258e-38	130.499
432628	42.7993	7.02722	1.1026	6.37333	1.84972e-10	1.21307e-09	130.438
18845	4295.74	7.02279	0.457705	15.3435	3.91572e-53	4.74411e-51	130.038
50916	45.3756	7.01609	1.18836	5.90401	3.54763e-09	1.99742e-08	129.435
353326	41.9262	7.00616	1.0945	6.40123	1.54126e-10	1.01936e-09	128.548
228139	102.686	7.00226	0.942079	7.43277	1.06346e-13	9.90547e-13	128.201
208188	45.0855	7.00156	1.19295	5.86912	4.38104e-09	2.43233e-08	128.139
93877	41.6141	6.99678	1.09193	6.40772	1.47713e-10	9.80516e-10	127.715
240095	42.9201	6.99645	1.13547	6.16174	7.19495e-10	4.39763e-09	127.686
68952	3109.39	6.99058	0.457679	15.274	1.13972e-52	1.35081e-50	127.167
18014	41.5511	6.96775	1.12234	6.20824	5.35796e-10	3.33466e-09	125.171
73713	40.3954	6.96058	1.0887	6.39349	1.62141e-10	1.06891e-09	124.55
93702	98.2762	6.95183	0.86766	8.01216	1.12714e-15	1.26357e-14	123.797
245684	363.679	6.95102	0.646511	10.7516	5.82491e-27	1.58259e-25	123.727
11519	2356.82	6.95042	0.830664	8.36731	5.89489e-17	7.54435e-16	123.676
67088	415.954	6.94642	0.567185	12.2472	1.73955e-34	7.54696e-33	123.333
381310	189.661	6.93733	0.671287	10.3344	4.92644e-25	1.15938e-23	122.559
12941	70.189	6.93491	0.989835	7.00613	2.45003e-12	1.9897e-11	122.354
100418235	39.3913	6.93202	1.08211	6.40604	1.49343e-10	9.90134e-10	122.109
74053	1008.42	6.92856	0.604874	11.4545	2.23137e-30	7.49411e-29	121.816
217843	1419.72	6.92303	0.671787	10.3054	6.66083e-25	1.54751e-23	121.35
195646	66.3305	6.91727	0.979419	7.06263	1.63383e-12	1.35237e-11	120.867
23964	1072.81	6.91637	0.614845	11.249	2.34338e-29	7.37082e-28	120.791
13839	1321.18	6.91159	0.462919	14.9305	2.08842e-50	2.24725e-48	120.392
330790	38.9951	6.91055	1.09251	6.32539	2.52586e-10	1.6329e-09	120.305
240322	64.9873	6.8914	0.94491	7.29318	3.02715e-13	2.7041e-12	118.718
239408	40.5612	6.88947	1.16432	5.91714	3.27588e-09	1.84887e-08	118.56
17829	38.8841	6.88836	1.11236	6.19255	5.91993e-10	3.65521e-09	118.469
20269	2893.15	6.88308	0.460548	14.9454	1.6685e-50	1.83154e-48	118.036
100503393	63.2501	6.88255	0.9418	7.30787	2.7142e-13	2.4392e-12	117.992
100504262	38.293	6.87688	1.10064	6.24805	4.15611e-10	2.61753e-09	117.53
100040500	39.7726	6.87214	1.15553	5.94718	2.72798e-09	1.55412e-08	117.144
100303647	64.1004	6.8697	0.946777	7.25588	3.9906e-13	3.52241e-12	116.946
332359	148.314	6.86781	0.677821	10.1322	3.97663e-24	8.8372e-23	116.793
211949	929.897	6.86518	0.619496	11.0819	1.53621e-28	4.62729e-27	116.58
619331	84.5758	6.86263	1.09584	6.26241	3.79065e-10	2.4003e-09	116.375
19276	1126.75	6.85809	0.389936	17.5877	3.05994e-69	6.85595e-67	116.008
380918	64.369	6.85713	0.999851	6.85815	6.97559e-12	5.37666e-11	115.932
225870	38.0169	6.85589	1.11156	6.16781	6.92432e-10	4.24014e-09	115.832
245595	642.417	6.85557	0.485647	14.1164	3.01115e-45	2.46252e-43	115.807
14788	1461.98	6.85199	0.370218	18.508	1.77972e-76	5.82181e-74	115.519
259302	7275.65	6.84619	0.321993	21.2619	2.55723e-100	1.67304e-97	115.056
13800	2634.27	6.84511	0.509149	13.4442	3.32898e-41	2.14365e-39	114.969
230379	61.5801	6.84247	0.944843	7.24191	4.42408e-13	3.88616e-12	114.759
216152	8221.33	6.84171	0.472407	14.4827	1.55959e-47	1.44936e-45	114.699
15221	2642.25	6.83635	0.813446	8.40418	4.30846e-17	5.58835e-16	114.274
16371	279.347	6.83385	0.652007	10.4812	1.05343e-25	2.64669e-24	114.076
75607	4243.29	6.83328	0.416265	16.4157	1.47739e-60	2.17695e-58	114.031
16510	37.1948	6.83138	1.10651	6.17378	6.66753e-10	4.09055e-09	113.881
232854	37.9771	6.82468	1.14124	5.98008	2.23022e-09	1.28397e-08	113.353
207592	6549.54	6.80905	0.492464	13.8265	1.76439e-43	1.26572e-41	112.131
320508	800.419	6.79439	0.426378	15.9351	3.61367e-57	4.84469e-55	110.998	Slc18a3
77739	1109.25	6.79361	0.713755	9.51814	1.76313e-21	3.30609e-20	110.938
20607	36.6015	6.78866	1.12857	6.01529	1.79566e-09	1.04705e-08	110.558
58208	733.996	6.77445	0.783829	8.64278	5.48639e-18	7.67625e-17	109.475
14738	36.0002	6.77321	1.12046	6.04502	1.49392e-09	8.81796e-09	109.381
22283	38.547	6.77276	1.21041	5.59541	2.201e-08	1.118e-07	109.346
74959	35.2207	6.77273	1.09156	6.20461	5.48325e-10	3.40357e-09	109.344
241263	85.3682	6.77054	0.900699	7.51699	5.6053e-14	5.37714e-13	109.178
268723	344.922	6.76947	0.539512	12.5474	4.10859e-36	1.98817e-34	109.097
666938	1902.87	6.76685	0.823959	8.2126	2.16444e-16	2.61846e-15	108.899
110891	1285.76	6.76489	0.545599	12.399	2.64563e-35	1.22931e-33	108.752
56838	35.5261	6.75384	1.12217	6.01853	1.76006e-09	1.02886e-08	107.921
433367	35.6418	6.75343	1.12636	5.99579	2.02494e-09	1.1728e-08	107.891
64293	1585.47	6.74374	0.87754	7.68483	1.53205e-14	1.53638e-13	107.169
100504589	34.285	6.73368	1.09185	6.16722	6.95007e-10	4.25432e-09	106.424
319888	80.076	6.72273	0.820405	8.1944	2.51851e-16	3.0311e-15	105.619
15413	1347.28	6.71741	0.507241	13.243	4.95075e-40	2.977e-38	105.231
112418	33.7371	6.71662	1.08861	6.16991	6.83306e-10	4.18739e-09	105.173
106931	482.202	6.71244	0.419479	16.0018	1.24048e-57	1.67681e-55	104.869
18994	160.248	6.69751	0.724901	9.2392	2.48343e-20	4.2983e-19	103.789
225288	780.611	6.68837	0.606114	11.0348	2.59543e-28	7.70434e-27	103.133
71146	646.438	6.68807	0.837481	7.98594	1.39454e-15	1.54324e-14	103.112
623954	75.6101	6.68803	1.1058	6.04812	1.46548e-09	8.65949e-09	103.109
71908	32.9914	6.68206	1.09289	6.11414	9.70778e-10	5.82894e-09	102.683
13349	376.235	6.67489	0.480541	13.8904	7.24667e-44	5.41217e-42	102.174
14823	33.1127	6.67076	1.10792	6.021	1.73347e-09	1.01477e-08	101.882
13193	29440.2	6.66194	0.493563	13.4977	1.61437e-41	1.06471e-39	101.261
18505	33.1791	6.65406	1.1281	5.89845	3.66937e-09	2.05817e-08	100.71
21823	33.3246	6.65397	1.13658	5.85436	4.7886e-09	2.64781e-08	100.704
93879	54.419	6.64964	0.94302	7.05142	1.77095e-12	1.45849e-11	100.402
59090	7729.24	6.6492	0.463757	14.3377	1.27265e-46	1.11911e-44	100.371
319377	34.0044	6.64914	1.16686	5.69832	1.20992e-08	6.3286e-08	100.367
59012	340.618	6.64611	0.473807	14.0271	1.0649e-44	8.45508e-43	100.156
50787	104.327	6.64373	0.930853	7.13726	9.52119e-13	8.09821e-12	99.9916
229759	70.4013	6.6327	1.08945	6.08811	1.14249e-09	6.81742e-09	99.2297
27062	4734.28	6.62481	0.391187	16.9351	2.47815e-64	4.17862e-62	98.6884
242509	119.25	6.6232	0.9135	7.25035	4.15699e-13	3.66138e-12	98.5781
100045778	31.2234	6.59601	1.10521	5.96811	2.40022e-09	1.37446e-08	96.738
269683	99.6734	6.59595	0.770681	8.55859	1.14255e-17	1.54954e-16	96.7338
18012	201.679	6.59557	0.931637	7.07956	1.44618e-12	1.20436e-11	96.7087
16502	1129.79	6.59473	0.694731	9.4925	2.25554e-21	4.18748e-20	96.6524
71733	62.685	6.59122	1.03996	6.33795	2.32841e-10	1.51245e-09	96.417
76965	1097.52	6.58192	0.965165	6.81947	9.13756e-12	6.94811e-11	95.7977
93888	227.174	6.56498	0.934313	7.02654	2.11725e-12	1.7289e-11	94.6795
232974	31.3244	6.55944	1.1472	5.71781	1.07908e-08	5.68784e-08	94.3167
22431	32.2386	6.55624	1.18792	5.5191	3.40744e-08	1.68121e-07	94.1076
94332	4633.05	6.55457	0.390505	16.7848	3.15139e-63	5.05334e-61	93.9985
68852	30.0711	6.55309	1.09474	5.98596	2.15111e-09	1.24192e-08	93.9026
13385	3661.6	6.54251	0.303189	21.579	2.82896e-103	2.1032e-100	93.2163
20855	50.6964	6.54233	0.949962	6.88694	5.70042e-12	4.44829e-11	93.2047
13628	1386.04	6.54209	0.593547	11.022	2.99246e-28	8.81887e-27	93.189
240063	967.552	6.51258	0.664913	9.79463	1.18732e-22	2.40643e-21	91.3024
100736249	1265.32	6.50882	0.58646	11.0985	1.2757e-28	3.87832e-27	91.0649
14172	28.8817	6.50351	1.08872	5.97354	2.32164e-09	1.33487e-08	90.7301
17536	4001	6.49634	0.371615	17.4814	1.98573e-68	4.11122e-66	90.2806
665413	29.0763	6.49331	1.10959	5.852	4.85707e-09	2.68386e-08	90.0907
233902	3863.02	6.4883	0.360025	18.0218	1.31446e-72	3.58321e-70	89.7783
93882	28.8128	6.48744	1.10014	5.89691	3.70365e-09	2.07669e-08	89.7249
74123	4115.27	6.48073	0.556136	11.6531	2.21169e-31	7.88112e-30	89.3086
353236	29.8455	6.47621	1.16388	5.56435	2.63135e-08	1.32141e-07	89.0292
11830	28.3831	6.47107	1.09972	5.88428	3.99782e-09	2.23092e-08	88.7126
100038712	28.657	6.46868	1.11513	5.80082	6.59908e-09	3.57517e-08	88.5661
654793	28.2747	6.4676	1.09644	5.89875	3.66266e-09	2.05581e-08	88.4999
330863	4993.93	6.46228	0.448384	14.4124	4.32615e-47	3.92783e-45	88.1738
110385	28.072	6.45733	1.0955	5.89442	3.7599e-09	2.10678e-08	87.8722
74530	28.4317	6.456	1.11835	5.7728	7.79658e-09	4.1728e-08	87.791
225743	3163.39	6.4506	0.464848	13.8768	8.75978e-44	6.48303e-42	87.4627
12569	6007.17	6.44904	0.256264	25.1656	9.53589e-140	1.55969e-136	87.3682
244431	28.0863	6.44628	1.10837	5.81602	6.02637e-09	3.28229e-08	87.2015
100043072	27.6467	6.44002	1.09287	5.89276	3.79802e-09	2.12669e-08	86.8242
100038489	30.1517	6.43577	1.2175	5.28605	1.24988e-07	5.70716e-07	86.5688
320080	810.485	6.42766	0.451245	14.2443	4.86588e-46	4.16682e-44	86.083
243372	264.715	6.42622	0.463456	13.8659	1.01987e-43	7.44685e-42	85.9975
320429	292.832	6.41725	0.636279	10.0856	6.39853e-24	1.40476e-22	85.4641
100040529	27.0478	6.41157	1.09052	5.87938	4.11813e-09	2.29571e-08	85.1288
56808	1366.67	6.39863	0.55127	11.6071	3.79376e-31	1.33156e-29	84.3684
229714	26.9403	6.39217	1.10553	5.78202	7.38099e-09	3.97017e-08	83.9916
21336	57.8738	6.39126	1.19378	5.35379	8.61312e-08	4.02503e-07	83.9387
228807	144.886	6.38309	0.584177	10.9266	8.59669e-28	2.4465e-26	83.4647
269060	457.409	6.3821	0.496168	12.8628	7.28988e-38	3.88382e-36	83.4071
319818	27.3595	6.37617	1.14684	5.55976	2.70151e-08	1.35415e-07	83.065
320560	1391.14	6.3738	0.779591	8.17582	2.93858e-16	3.52371e-15	82.9287
22066	64.5327	6.36699	0.865974	7.3524	1.94672e-13	1.77286e-12	82.5383
11790	997.596	6.3616	0.299053	21.2725	2.04172e-100	1.39143e-97	82.2306
16011	5028.63	6.35984	0.429857	14.7952	1.57216e-49	1.61725e-47	82.1304
791336	26.4534	6.35772	1.11798	5.6868	1.2944e-08	6.7403e-08	82.0094
27140	27.4137	6.35461	1.17358	5.41473	6.13809e-08	2.92524e-07	81.8332
317755	26.657	6.35256	1.13725	5.58591	2.32475e-08	1.17393e-07	81.7167
192775	26.4347	6.34961	1.1255	5.64159	1.68489e-08	8.66879e-08	81.5497
52897	1623.28	6.34649	0.365161	17.38	1.17e-67	2.3056e-65	81.3738
71769	26.1392	6.34459	1.11122	5.70959	1.13252e-08	5.94463e-08	81.2663
12564	617.773	6.3429	0.786259	8.06719	7.19334e-16	8.27968e-15	81.1717
240776	26.174	6.33805	1.12114	5.65324	1.57449e-08	8.12891e-08	80.899
664791	67.2519	6.33348	0.909367	6.96471	3.29073e-12	2.63969e-11	80.643
268527	281.065	6.32352	0.723913	8.7352	2.43228e-18	3.52681e-17	80.0885
81905	171.061	6.31553	0.604974	10.4394	1.63928e-25	4.02584e-24	79.6461
17175	42.286	6.29805	0.978568	6.43599	1.22673e-10	8.22031e-10	78.6871
210162	687.636	6.29528	0.69439	9.06591	1.23568e-19	2.0231e-18	78.536
216439	3221.86	6.29502	0.50539	12.4558	1.30102e-35	6.15012e-34	78.5215
20231	26.4925	6.29469	1.18591	5.3079	1.10898e-07	5.11229e-07	78.5036
71685	155.56	6.29403	0.578109	10.8873	1.32542e-27	3.71844e-26	78.4679
100503085	170.087	6.29148	0.752664	8.35895	6.32808e-17	8.06719e-16	78.3291
18197	5709.33	6.28934	0.41951	14.9921	8.26594e-51	9.19712e-49	78.2134
319317	8061.95	6.28575	0.928717	6.76821	1.30387e-11	9.78712e-11	78.0187
58212	1099.52	6.28485	0.356246	17.6419	1.17478e-69	2.78474e-67	77.9704
12943	25.4387	6.27917	1.14326	5.49234	3.96635e-08	1.93826e-07	77.6637
100862301	77.9558	6.27789	0.832012	7.54544	4.50775e-14	4.36782e-13	77.595
58235	1931.37	6.25024	0.414156	15.0915	1.84211e-51	2.11983e-49	76.1219
244579	760.008	6.24295	0.595921	10.4761	1.11197e-25	2.78519e-24	75.7382
218820	2337.59	6.23836	0.458591	13.6033	3.8276e-42	2.60851e-40	75.4975
628779	110.543	6.23128	0.731707	8.51608	1.65042e-17	2.21084e-16	75.128
414072	74.1135	6.22883	0.750602	8.29845	1.05482e-16	1.32204e-15	75.0006
233879	111.775	6.22153	0.713159	8.7239	2.68774e-18	3.88474e-17	74.6218
231238	94.5373	6.21233	0.729545	8.51534	1.66101e-17	2.22319e-16	74.1476
100499530	23.6386	6.21179	1.11171	5.58758	2.3025e-08	1.16449e-07	74.1199
243961	5674.41	6.20609	0.493023	12.5878	2.46343e-36	1.20634e-34	73.8277
98170	7594.27	6.20565	0.357103	17.3778	1.21564e-67	2.36703e-65	73.8054
69430	173.928	6.20162	0.579437	10.7028	9.87239e-27	2.62557e-25	73.5991
53978	180.993	6.19957	0.53049	11.6865	1.49418e-31	5.40682e-30	73.4946
74288	23.7854	6.1981	1.13676	5.45244	4.96843e-08	2.39504e-07	73.4201
230025	23.3461	6.1869	1.11933	5.52731	3.2517e-08	1.61068e-07	72.8523
83561	23.3055	6.18191	1.12141	5.51261	3.53555e-08	1.7397e-07	72.6008
53883	5929.15	6.17801	0.333087	18.5477	8.50393e-77	2.95937e-74	72.4047
14536	240.299	6.17483	0.470988	13.1104	2.87204e-39	1.6599e-37	72.2451
328451	126.297	6.16741	0.590625	10.4422	1.59096e-25	3.92484e-24	71.8748
15399	535.317	6.16739	0.44396	13.8918	7.10534e-44	5.33096e-42	71.8737
270028	951.134	6.16731	0.373454	16.5142	2.8978e-61	4.42957e-59	71.8698
93688	134.68	6.16557	1.09897	5.61034	2.01927e-08	1.03049e-07	71.7832
100043910	22.8075	6.1621	1.1111	5.54596	2.92339e-08	1.45955e-07	71.6106
238271	22.8943	6.15819	1.11961	5.50031	3.79121e-08	1.85796e-07	71.4166
15563	22.6988	6.14311	1.12325	5.46906	4.52441e-08	2.19393e-07	70.6741
73144	22.3453	6.142	1.0995	5.58619	2.32099e-08	1.17239e-07	70.6199
381148	126.625	6.14049	0.733608	8.37027	5.74875e-17	7.37463e-16	70.546
50874	22.2144	6.1384	1.09815	5.58976	2.27389e-08	1.15145e-07	70.4439
103988	22.4429	6.12637	1.12762	5.433	5.54132e-08	2.65866e-07	69.8589
26422	6542.86	6.12486	0.583227	10.5017	8.48525e-26	2.14837e-24	69.7858
269295	23.1773	6.11789	1.1845	5.16496	2.40493e-07	1.05569e-06	69.4496
50782	40.9743	6.11158	1.057	5.782	7.38156e-09	3.97017e-08	69.1461
16774	23.6984	6.10611	1.22429	4.98748	6.11718e-07	2.53747e-06	68.8847
622645	21.8859	6.09334	1.12129	5.43424	5.50298e-08	2.6426e-07	68.2778
668504	135.142	6.09214	0.583242	10.4453	1.53965e-25	3.80402e-24	68.2209
268345	100.037	6.08944	0.696987	8.73681	2.39781e-18	3.47991e-17	68.0934
16814	53.1137	6.08843	0.941207	6.46874	9.88207e-11	6.70947e-10	68.0454
72395	21.6934	6.08629	1.11925	5.43783	5.3932e-08	2.59216e-07	67.9448
81006	22.1081	6.08612	1.14699	5.30616	1.11959e-07	5.1554e-07	67.9365
378430	21.6958	6.08424	1.12153	5.42495	5.79723e-08	2.76926e-07	67.8483
238021	22.1031	6.08002	1.1569	5.25546	1.47654e-07	6.67871e-07	67.6501
217682	22.1511	6.0788	1.16119	5.23499	1.64992e-07	7.40561e-07	67.5927
67217	82.8012	6.07719	0.686788	8.84871	8.85381e-19	1.34835e-17	67.5173
100502679	22.0499	6.06978	1.16285	5.21972	1.7919e-07	8.00557e-07	67.1715
233651	5602.18	6.06922	0.558528	10.8665	1.66546e-27	4.64059e-26	67.1457
209032	919.813	6.0681	0.458916	13.2227	6.49048e-40	3.8603e-38	67.0936
93893	92.0708	6.06671	0.760083	7.98163	1.44409e-15	1.59376e-14	67.0287
18191	2411.96	6.06662	0.620417	9.77829	1.39545e-22	2.81083e-21	67.0245
216456	21.0228	6.06131	1.1016	5.50228	3.74921e-08	1.83985e-07	66.7785
75799	21.1561	6.05791	1.115	5.43312	5.53785e-08	2.65778e-07	66.621
66705	56.9112	6.05458	0.904421	6.69443	2.16521e-11	1.58736e-10	66.4677
18452	65.6136	6.0509	0.779452	7.76302	8.29307e-15	8.54704e-14	66.2983
114142	3592.01	6.04986	0.669347	9.03846	1.58899e-19	2.56307e-18	66.2507
239096	1107.44	6.04533	0.959476	6.30066	2.9638e-10	1.89878e-09	66.043
19378	842.993	6.04467	1.03587	5.83533	5.36827e-09	2.94741e-08	66.0127
100504261	21.0477	6.04325	1.12074	5.3922	6.96018e-08	3.29496e-07	65.9476
243897	21.049	6.04118	1.12256	5.38161	7.38217e-08	3.47862e-07	65.8533
67430	20.9828	6.03753	1.12171	5.38245	7.34788e-08	3.46345e-07	65.6867
18187	7287.68	6.0287	0.347779	17.3349	2.56654e-67	4.93862e-65	65.2861
64085	1175.18	6.02866	0.863528	6.98143	2.92195e-12	2.35658e-11	65.2841
18205	64.6589	6.02817	1.1246	5.3603	8.3086e-08	3.88606e-07	65.2619
192164	65.7817	6.02663	0.868842	6.93639	4.02245e-12	3.1891e-11	65.1923
11438	2726.36	6.02621	0.426231	14.1384	2.20354e-45	1.82026e-43	65.1734
100503659	3237.61	6.02586	0.212196	28.3976	2.16247e-177	1.76847e-173	65.1574
239650	667.381	6.02501	0.348465	17.2902	5.57975e-67	1.03707e-64	65.1191
22776	22.0933	6.01934	1.21672	4.9472	7.52869e-07	3.09395e-06	64.8636
15407	20.3897	6.01895	1.1022	5.46086	4.73832e-08	2.28951e-07	64.8461
11472	20.394	6.01809	1.1013	5.46452	4.64167e-08	2.24746e-07	64.8077
320472	2049.52	6.0175	0.393799	15.2806	1.02913e-52	1.22865e-50	64.7812
15402	2950.83	6.01545	0.51001	11.7948	4.15368e-32	1.55109e-30	64.6892
16492	80.4225	6.01221	0.845579	7.11017	1.15897e-12	9.75107e-12	64.544
240058	87.0303	6.01201	0.96893	6.20479	5.47699e-10	3.40189e-09	64.5348
69202	8976.61	6.00652	0.343583	17.482	1.96522e-68	4.11122e-66	64.2899
72789	20.9779	6.00438	1.1587	5.18201	2.19511e-07	9.70356e-07	64.1947
26549	20.5061	6.00406	1.12716	5.32672	1.00001e-07	4.62692e-07	64.1803
434438	20.4794	6.00308	1.12471	5.33743	9.42716e-08	4.38166e-07	64.1369
233246	21.1016	5.99494	1.17812	5.08856	3.60797e-07	1.53877e-06	63.7757
140919	877.35	5.99402	0.756794	7.92029	2.36962e-15	2.55826e-14	63.7354
103232	33.8716	5.99047	0.978718	6.12073	9.3145e-10	5.60308e-09	63.5788
78185	20.6981	5.98686	1.15776	5.17109	2.32737e-07	1.02329e-06	63.4195
435684	641.236	5.98601	0.651791	9.18393	4.1563e-20	7.0446e-19	63.3822
68515	20.1958	5.98355	1.12835	5.30294	1.13955e-07	5.23847e-07	63.2743
53417	20.6548	5.98298	1.15883	5.16296	2.43075e-07	1.06531e-06	63.2493
237387	328.976	5.98086	0.728885	8.20548	2.29667e-16	2.77432e-15	63.1563
20379	19.9516	5.97483	1.1186	5.34136	9.2254e-08	4.29521e-07	62.8933
26419	3285.63	5.97394	0.408331	14.6301	1.80441e-48	1.77788e-46	62.8542
109593	698.622	5.96881	0.741739	8.04705	8.48113e-16	9.65327e-15	62.6313
64378	35.5652	5.96334	1.02133	5.83882	5.25718e-09	2.89127e-08	62.3941
15126	147.845	5.96228	1.53835	3.87578	0.000106285	0.000313225	62.3485
71186	19.6976	5.95654	1.11833	5.3263	1.00236e-07	4.63648e-07	62.1006
23923	19.849	5.95583	1.13424	5.25094	1.51324e-07	6.83118e-07	62.0704
237716	32.732	5.95144	0.964906	6.16789	6.92061e-10	4.23946e-09	61.8816
242274	371.187	5.94794	0.867326	6.85778	6.99371e-12	5.38555e-11	61.7315
18166	19.547	5.94766	1.11356	5.34114	9.23631e-08	4.29906e-07	61.7199
117600	2665.36	5.9412	0.58064	10.2321	1.42331e-24	3.24229e-23	61.4438
16511	1489.81	5.93701	0.688224	8.62657	6.32193e-18	8.78517e-17	61.2658
12404	642.767	5.93384	0.658913	9.00549	2.14696e-19	3.44272e-18	61.1314
27209	19.4406	5.93081	1.13061	5.24568	1.55704e-07	7.01568e-07	61.0032
74992	21.5255	5.92443	1.27751	4.63747	3.52693e-06	1.31434e-05	60.7339
100009600	19.3402	5.91436	1.13951	5.19026	2.10003e-07	9.31095e-07	60.3112
73100	315.158	5.91125	0.808608	7.3104	2.66354e-13	2.39631e-12	60.1814
213573	51.809	5.90971	0.911876	6.48083	9.12198e-11	6.22701e-10	60.1174
107751	19.4699	5.90749	1.15605	5.11008	3.22021e-07	1.38677e-06	60.0249
78919	19.0345	5.9038	1.12707	5.23819	1.62158e-07	7.29043e-07	59.8714
15376	29.48	5.89898	1.55757	3.7873	0.000152293	0.000437383	59.6719
18190	6390.01	5.89716	0.499693	11.8016	3.83157e-32	1.43408e-30	59.5966
233904	1277.78	5.89541	0.522897	11.2745	1.75359e-29	5.55849e-28	59.5245
381979	2440.9	5.89381	0.526823	11.1874	4.69782e-29	1.45526e-27	59.4583
668158	391.482	5.89112	0.468509	12.5742	2.92795e-36	1.42954e-34	59.3477
100036523	20.3082	5.88913	1.23535	4.76718	1.86825e-06	7.23759e-06	59.266
70551	752.59	5.88807	0.564317	10.434	1.73501e-25	4.23549e-24	59.2222
15132	30.3036	5.88249	1.58333	3.71527	0.000202984	0.000570351	58.9938
319476	19.0523	5.87739	1.15929	5.06981	3.98222e-07	1.68826e-06	58.7855
241514	279.957	5.87335	0.743804	7.89637	2.87152e-15	3.07978e-14	58.6211
16716	44.7214	5.87279	0.892415	6.58079	4.67954e-11	3.31192e-10	58.5986
15405	350.819	5.86757	0.98993	5.92726	3.08032e-09	1.74754e-08	58.387
77057	19.2463	5.86266	1.1883	4.93367	8.06981e-07	3.29892e-06	58.1884
107770	31.5081	5.85903	0.973739	6.01705	1.77629e-09	1.03761e-08	58.0423
319970	34.1169	5.85227	1.06417	5.49938	3.81134e-08	1.86697e-07	57.7707
15412	490.633	5.85042	0.399986	14.6266	1.90162e-48	1.86245e-46	57.6967
208936	31.8824	5.84914	0.992944	5.89071	3.84545e-09	2.15177e-08	57.6457
107656	19.0643	5.84768	1.1911	4.90949	9.1314e-07	3.70328e-06	57.5872
19288	18.2633	5.84031	1.13138	5.16211	2.44187e-07	1.0699e-06	57.2938
12672	17.9172	5.82983	1.11625	5.22268	1.7635e-07	7.89378e-07	56.8794
620292	18.6764	5.82374	1.18475	4.91558	8.85182e-07	3.59971e-06	56.6395
574428	17.6787	5.82225	1.10524	5.26787	1.38013e-07	6.26519e-07	56.5811
100504676	17.7681	5.81184	1.12272	5.17655	2.26025e-07	9.96095e-07	56.1743
381853	17.4692	5.80422	1.10565	5.24959	1.52435e-07	6.87406e-07	55.8784
22152	22014.8	5.79929	0.544501	10.6507	1.73142e-26	4.56759e-25	55.6879
102614	181.542	5.78654	0.668917	8.6506	5.12295e-18	7.20473e-17	55.1977
78923	93.7481	5.78583	0.718801	8.04928	8.32792e-16	9.50569e-15	55.1709
75555	17.5799	5.78483	1.13597	5.09241	3.53544e-07	1.51099e-06	55.1324
100417675	21.6066	5.78394	1.39484	4.14668	3.37333e-05	0.000107762	55.0986
100045653	17.378	5.77837	1.12719	5.12633	2.95449e-07	1.27773e-06	54.886
330814	7161.56	5.77182	0.457964	12.6032	2.02705e-36	1.00164e-34	54.6375
23892	50.4949	5.76943	0.974654	5.91946	3.22991e-09	1.82419e-08	54.5471
236798	19.6897	5.76787	1.31613	4.38244	1.17356e-05	4.0266e-05	54.488
22693	176.183	5.76737	0.474785	12.1473	5.92705e-34	2.49853e-32	54.4692
18491	48.548	5.76586	1.09763	5.25299	1.49649e-07	6.76335e-07	54.4124	Pappa
19259	3708.74	5.76474	0.500723	11.5128	1.1369e-30	3.87399e-29	54.37
80982	17.2165	5.76361	1.12811	5.10908	3.23736e-07	1.39379e-06	54.3274
223650	28.5142	5.75707	0.972181	5.92181	3.18415e-09	1.80145e-08	54.0819
22715	2180.18	5.75514	0.576851	9.97682	1.92539e-23	4.10048e-22	54.0093
26456	2801.36	5.75341	0.439813	13.0815	4.20112e-39	2.3942e-37	53.9446
213742	6036.76	5.75243	1.44078	3.99258	6.53596e-05	0.000199533	53.908
13829	942.593	5.74692	0.396378	14.4986	1.23698e-47	1.16948e-45	53.7024
320485	17.2528	5.74144	1.1616	4.94268	7.70541e-07	3.16142e-06	53.4991
67791	17.2348	5.73689	1.16618	4.91939	8.68157e-07	3.53575e-06	53.3305
26875	2597.23	5.73473	0.458235	12.5148	6.19386e-36	2.9884e-34	53.2509
12810	28.1334	5.73417	0.949249	6.04075	1.53403e-09	9.04166e-09	53.2301
11567	16.9296	5.72921	1.14527	5.00248	5.65965e-07	2.35426e-06	53.0475
12161	43.8104	5.72362	0.987588	5.79556	6.8095e-09	3.68307e-08	52.8424
208080	38.108	5.7193	1.1255	5.08159	3.74298e-07	1.59179e-06	52.6843
16904	16.4255	5.71118	1.12061	5.0965	3.45996e-07	1.48222e-06	52.3885
382913	16.2559	5.70481	1.10645	5.15596	2.52333e-07	1.10411e-06	52.1578
63828	63.6749	5.70305	0.68831	8.28558	1.17531e-16	1.46743e-15	52.0943
100503871	27.5905	5.69936	0.954569	5.97062	2.36359e-09	1.35598e-08	51.9612
93878	137.794	5.69758	0.586765	9.71016	2.72918e-22	5.35234e-21	51.8971
280411	942.162	5.69098	0.523986	10.8609	1.76941e-27	4.92185e-26	51.6601
209540	16.4356	5.69093	1.13838	4.99914	5.75862e-07	2.39359e-06	51.6584
18507	252.758	5.68792	0.721421	7.88433	3.16217e-15	3.38263e-14	51.5507
73569	41.9215	5.67697	1.07336	5.28896	1.23016e-07	5.62337e-07	51.161
320460	17.2375	5.67622	1.22953	4.61656	3.90144e-06	1.44404e-05	51.1345
81000	2109.48	5.67489	0.424238	13.3766	8.27974e-41	5.2694e-39	51.0871
78772	16.0531	5.67464	1.12457	5.04603	4.51075e-07	1.90002e-06	51.0785
72000	100.466	5.67286	0.632901	8.96327	3.15192e-19	4.98577e-18	51.0153
72185	746.469	5.67012	0.661431	8.5725	1.0126e-17	1.37903e-16	50.9184
214779	16.3533	5.66965	1.15625	4.90349	9.41506e-07	3.80887e-06	50.9019
434280	15.8732	5.66645	1.11571	5.07878	3.79871e-07	1.61381e-06	50.7891
236511	4593.2	5.66637	0.288589	19.6347	7.81382e-86	3.36323e-83	50.7863
243911	16.1466	5.66611	1.13915	4.97396	6.5598e-07	2.7142e-06	50.7773
442825	50.2167	5.66533	0.74331	7.62175	2.50257e-14	2.47298e-13	50.7496
320747	16.3526	5.66354	1.16485	4.86202	1.16195e-06	4.6173e-06	50.687
108899	5931.82	5.65879	0.515543	10.9764	4.96481e-28	1.43725e-26	50.5202
13638	351.791	5.65709	0.598075	9.45882	3.11433e-21	5.7492e-20	50.4607
100503041	86.1069	5.65671	0.637399	8.87468	7.01365e-19	1.07613e-17	50.4475
239336	16.1157	5.64834	1.15652	4.88391	1.04004e-06	4.17652e-06	50.1555
77629	60.8511	5.63579	0.944742	5.96543	2.43994e-09	1.39586e-08	49.7213
231290	388.614	5.63397	0.629323	8.95244	3.47719e-19	5.47381e-18	49.6587	Slc10a4
76980	3771.9	5.63287	0.561111	10.0388	1.02928e-23	2.22128e-22	49.6209
240675	15.5238	5.62104	1.13662	4.94542	7.59818e-07	3.12094e-06	49.2155
240025	34.1337	5.61971	1.10313	5.09434	3.4996e-07	1.49646e-06	49.1701
93884	15.8195	5.61814	1.16268	4.83205	1.35132e-06	5.32839e-06	49.1167
100039691	15.2126	5.612	1.11147	5.04918	4.43699e-07	1.86991e-06	48.908
23937	5623.26	5.61136	1.07939	5.19862	2.00775e-07	8.92531e-07	48.8863
21832	15.5212	5.61081	1.14225	4.91206	9.01246e-07	3.65867e-06	48.8679
235130	26.9071	5.60474	1.00213	5.59285	2.23372e-08	1.13286e-07	48.6626
268297	127.681	5.59369	0.605271	9.24163	2.42777e-20	4.21087e-19	48.2913
29861	2235.14	5.59255	0.427319	13.0875	3.8801e-39	2.22677e-37	48.2531
16522	16.3476	5.5891	1.24642	4.48411	7.32189e-06	2.59326e-05	48.1377
50720	162.349	5.5884	0.839849	6.65405	2.85133e-11	2.06813e-10	48.1143
104079	16.2812	5.58747	1.24659	4.48222	7.3872e-06	2.61526e-05	48.0834
75745	6883.23	5.58422	0.764993	7.2997	2.88408e-13	2.58335e-12	47.9753
73430	134.828	5.58366	0.675865	8.26151	1.43838e-16	1.77288e-15	47.9568
74341	15.1654	5.58259	1.14244	4.88655	1.02616e-06	4.12611e-06	47.9211
238276	319.988	5.58062	0.55421	10.0695	7.53629e-24	1.65011e-22	47.8556
231044	15.1084	5.58025	1.13773	4.90471	9.3565e-07	3.78612e-06	47.8435
14169	206.598	5.56874	0.626483	8.88889	6.17246e-19	9.51525e-18	47.4632
16870	17.2172	5.56832	1.33936	4.15745	3.21819e-05	0.000103189	47.4496
72677	14.892	5.56572	1.13277	4.91335	8.95334e-07	3.63884e-06	47.3639
100503222	386.278	5.5648	0.512669	10.8546	1.89694e-27	5.26764e-26	47.3339
17883	15.3276	5.56469	1.17877	4.72077	2.34956e-06	8.98725e-06	47.3303
636741	15.2548	5.56227	1.17273	4.74303	2.10549e-06	8.10674e-06	47.2509
100038688	15	5.5607	1.14989	4.83586	1.32573e-06	5.23508e-06	47.1994
67307	14.6278	5.55957	1.10834	5.01612	5.27247e-07	2.20272e-06	47.1625
433004	14.9153	5.55848	1.14246	4.86535	1.14254e-06	4.55123e-06	47.1269
72669	14.7173	5.55727	1.11975	4.96298	6.94209e-07	2.86295e-06	47.0874
16917	15.517	5.55254	1.20895	4.59287	4.37182e-06	1.60398e-05	46.9334
242642	14.6644	5.55245	1.12394	4.94018	7.80514e-07	3.19792e-06	46.9303
235402	2561.89	5.55034	0.537197	10.332	5.0473e-25	1.18272e-23	46.8618
237523	15.0077	5.54986	1.15854	4.79041	1.66444e-06	6.48954e-06	46.8461
320924	42.3664	5.54949	0.959114	5.78606	7.20565e-09	3.88321e-08	46.8342
21683	14.7587	5.54747	1.13779	4.87566	1.08445e-06	4.34099e-06	46.7687
242667	593.839	5.53323	0.826531	6.69452	2.16381e-11	1.58705e-10	46.3092
14587	115.192	5.52725	0.634599	8.70983	3.04321e-18	4.37388e-17	46.1179
433938	2365.13	5.52376	0.405665	13.6166	3.19195e-42	2.19359e-40	46.0063
71046	14.5077	5.52164	1.14261	4.83247	1.34847e-06	5.31974e-06	45.9389
320354	14.4326	5.52044	1.13413	4.86755	1.12988e-06	4.50408e-06	45.9007
252868	14.2884	5.51865	1.1207	4.92428	8.467e-07	3.4518e-06	45.8436
52670	14.2765	5.51598	1.12284	4.91252	8.99132e-07	3.65099e-06	45.7589
244058	2306.02	5.51378	0.646974	8.52241	1.56267e-17	2.09844e-16	45.6892
214305	14.148	5.50999	1.11275	4.9517	7.35671e-07	3.02936e-06	45.5691
14807	5328.03	5.50163	0.612002	8.98956	2.48213e-19	3.95689e-18	45.3061
100504545	24.7454	5.49488	1.06311	5.16868	2.3575e-07	1.0357e-06	45.0946
72518	104.866	5.49215	0.63534	8.64442	5.40802e-18	7.57308e-17	45.0091
71003	14.1637	5.48448	1.14995	4.76931	1.8486e-06	7.16487e-06	44.7707
14415	1574.2	5.48297	0.465904	11.7685	5.67563e-32	2.10024e-30	44.7237
114570	14.5057	5.48034	1.19183	4.59825	4.26047e-06	1.56805e-05	44.6423
54140	14.3064	5.47804	1.17263	4.67157	2.98909e-06	1.12545e-05	44.5712
67498	14.913	5.47368	1.23984	4.41483	1.01089e-05	3.50224e-05	44.4368
70974	2236.49	5.4726	0.496201	11.029	2.7698e-28	8.20705e-27	44.4034
17380	14.9794	5.47117	1.2476	4.38535	1.15802e-05	3.97661e-05	44.3595
213311	43.7636	5.47067	0.807455	6.7752	1.24234e-11	9.34241e-11	44.344
320225	23.139	5.46804	0.945135	5.78546	7.23135e-09	3.89578e-08	44.2634
208431	25.156	5.46627	1.04093	5.25134	1.50994e-07	6.81916e-07	44.209
20713	1551.22	5.46176	0.267459	20.4209	1.09017e-92	5.09454e-90	44.071
227723	17775.1	5.45765	0.323722	16.8591	8.99993e-64	1.47203e-61	43.9456
216867	29.1714	5.45231	1.08006	5.04814	4.46121e-07	1.87964e-06	43.7833
17391	1660.58	5.45213	0.376448	14.4831	1.54978e-47	1.44847e-45	43.778
54003	4799.43	5.44455	0.526364	10.3437	4.46961e-25	1.05643e-23	43.5484
330070	13.4978	5.44416	1.11855	4.86717	1.13205e-06	4.51056e-06	43.5368
100040557	14.1564	5.44278	1.1979	4.54361	5.52998e-06	1.99401e-05	43.4951
76421	14.3389	5.43937	1.2205	4.45668	8.32375e-06	2.92718e-05	43.3924
77771	2348.14	5.43598	0.511672	10.624	2.30559e-26	6.0433e-25	43.2907
231602	40.8278	5.43058	0.948894	5.72307	1.04616e-08	5.51966e-08	43.129
666794	32.0139	5.42938	0.83802	6.47882	9.24403e-11	6.30243e-10	43.093
53761	12550.4	5.42904	0.209058	25.9691	1.10767e-148	3.01951e-145	43.0827
664883	10138.6	5.42724	0.527012	10.2981	7.18547e-25	1.66703e-23	43.0289
381798	13.2872	5.42377	1.11284	4.87379	1.09477e-06	4.37859e-06	42.9257
68271	13.7398	5.4146	1.18175	4.58184	4.6091e-06	1.68687e-05	42.6536
14633	74.2544	5.41342	0.841797	6.43079	1.26945e-10	8.49552e-10	42.6188
331424	13.2071	5.40905	1.12168	4.82226	1.4194e-06	5.57937e-06	42.4901
241770	164.739	5.40709	0.835145	6.47444	9.51655e-11	6.47743e-10	42.4324
56622	13.6253	5.40248	1.18472	4.56013	5.11229e-06	1.85403e-05	42.297
12168	1021.12	5.39316	0.626371	8.61017	7.29543e-18	1.00866e-16	42.0245
100042679	62.5736	5.39265	0.931968	5.78631	7.19514e-09	3.87883e-08	42.0098
271305	2772.43	5.38763	0.559824	9.62378	6.3457e-22	1.2182e-20	41.8636
243923	12.9662	5.38575	1.11759	4.81909	1.44217e-06	5.65933e-06	41.8092
100862191	1216.77	5.38523	0.533653	10.0913	6.03867e-24	1.32932e-22	41.7942
434778	21.5812	5.38504	0.95689	5.62764	1.82687e-08	9.35512e-08	41.7886
13447	70.5862	5.38253	0.770365	6.98699	2.80847e-12	2.26841e-11	41.716
13491	13.0216	5.37718	1.14168	4.70986	2.47882e-06	9.44852e-06	41.5615
654467	369.869	5.37459	0.477553	11.2544	2.20238e-29	6.94069e-28	41.4871
23963	209.444	5.37327	1.00819	5.32962	9.84176e-08	4.56011e-07	41.4491
19773	12.996	5.37291	1.14551	4.69042	2.72649e-06	1.03319e-05	41.4387
237730	399.854	5.37238	0.44741	12.0077	3.23572e-33	1.28455e-31	41.4235
269037	1985.08	5.36976	0.382636	14.0336	9.71187e-45	7.74865e-43	41.3484
74691	12.8791	5.36807	1.13303	4.7378	2.16049e-06	8.30285e-06	41.3001
243634	12.8466	5.36648	1.12769	4.75883	1.94719e-06	7.52201e-06	41.2545
77578	2234.53	5.36621	0.427373	12.5563	3.67196e-36	1.78215e-34	41.2468
319981	12.8786	5.36042	1.14098	4.69809	2.626e-06	9.98625e-06	41.0816
11705	12.8486	5.35815	1.14336	4.68633	2.78153e-06	1.05207e-05	41.0169
330096	43.0682	5.35503	0.843482	6.34872	2.17115e-10	1.41479e-09	40.9284
100503529	21.8386	5.3544	0.973477	5.50028	3.7918e-08	1.85796e-07	40.9105
210417	85.8219	5.35048	0.712294	7.51161	5.84053e-14	5.58642e-13	40.7994
244189	49.4555	5.34259	0.724542	7.37374	1.65907e-13	1.52277e-12	40.5769
99633	3563.29	5.33988	0.497842	10.726	7.68162e-27	2.05295e-25	40.5008
56323	1283.46	5.3371	0.31636	16.8703	7.44056e-64	1.22927e-61	40.4227
73010	181.446	5.33515	0.714666	7.46523	8.31535e-14	7.82993e-13	40.3682
278279	1118.94	5.33351	0.549169	9.71196	2.68134e-22	5.26482e-21	40.3223
214321	12.7384	5.33156	1.15449	4.61812	3.87225e-06	1.43421e-05	40.2679
212448	1767.02	5.33071	0.94653	5.63185	1.78285e-08	9.14401e-08	40.2444
15558	22.0309	5.32739	1.07148	4.97199	6.62704e-07	2.74063e-06	40.1516
319940	13.3378	5.32725	1.23626	4.30916	1.63879e-05	5.50167e-05	40.1477
74855	12.7661	5.32716	1.16731	4.56361	5.02825e-06	1.82517e-05	40.1453
214459	7603.55	5.32218	0.575974	9.2403	2.45811e-20	4.25898e-19	40.0069
16504	863.246	5.32052	0.450172	11.8189	3.11903e-32	1.17546e-30	39.961
328075	12.8566	5.31525	1.19426	4.45067	8.56037e-06	3.00394e-05	39.8153
15414	1532.01	5.31149	0.656698	8.08817	6.05674e-16	7.02084e-15	39.7116
100504717	12.4197	5.31089	1.14644	4.63252	3.61248e-06	1.34255e-05	39.695
360213	1610.5	5.31039	0.398935	13.3114	1.98742e-40	1.22204e-38	39.6813
65255	29.3762	5.29729	0.868846	6.09693	1.08124e-09	6.46611e-09	39.3228
330812	699.494	5.29339	0.550783	9.61067	7.20794e-22	1.38048e-20	39.2165
233878	4662.29	5.28989	0.302666	17.4777	2.11998e-68	4.3343e-66	39.1214
16876	76.4557	5.28939	0.968396	5.46201	4.70764e-08	2.27738e-07	39.108
106369	667.212	5.28471	0.463464	11.4026	4.05695e-30	1.34869e-28	38.9812
545207	12.3874	5.28469	1.17229	4.50802	6.54343e-06	2.33168e-05	38.9808
21676	423.701	5.27932	0.520478	10.1432	3.55232e-24	7.90499e-23	38.836
329427	12.119	5.27292	1.14644	4.59938	4.2376e-06	1.56034e-05	38.664
217866	3410.1	5.27268	0.247596	21.2955	1.24945e-100	8.88522e-98	38.6577
665268	23.379	5.27213	1.23099	4.28283	1.84527e-05	6.13316e-05	38.6429
20521	12.1337	5.26859	1.15646	4.55581	5.21843e-06	1.89084e-05	38.5482
270185	12.0083	5.26858	1.13664	4.63522	3.56557e-06	1.32753e-05	38.5479
269356	19.7416	5.25719	0.960528	5.47323	4.41898e-08	2.14854e-07	38.2449
328035	12.1882	5.257	1.17788	4.46309	8.07863e-06	2.84527e-05	38.2398
13082	13.5218	5.25483	1.33512	3.93586	8.28998e-05	0.000249019	38.1823
70592	11.8383	5.25436	1.13272	4.63869	3.5062e-06	1.30721e-05	38.1697
237353	375.138	5.25275	0.845525	6.21241	5.21778e-10	3.25236e-09	38.1272
14427	12.9809	5.24749	1.28531	4.08267	4.45214e-05	0.000139929	37.9884
22163	11.9384	5.24673	1.15879	4.52776	5.96129e-06	2.13635e-05	37.9685
100503231	28.5758	5.24601	0.900064	5.82849	5.59315e-09	3.05959e-08	37.9496
15118	162.803	5.23485	0.741756	7.05738	1.6967e-12	1.40158e-11	37.6571
73608	11.7357	5.23134	1.149	4.55297	5.28945e-06	1.91573e-05	37.5656
74490	11.6452	5.22875	1.13403	4.61075	4.01213e-06	1.48199e-05	37.4983
77579	5670.96	5.22638	0.472092	11.0707	1.74078e-28	5.20514e-27	37.4367
12286	1637.68	5.22524	0.476906	10.9565	6.1821e-28	1.77706e-26	37.4071
27762	11.7323	5.22418	1.15092	4.53914	5.64842e-06	2.03448e-05	37.3796
74297	12.4264	5.22252	1.25092	4.17494	2.98067e-05	9.59115e-05	37.3367
18639	19.4381	5.21886	0.988155	5.28142	1.28186e-07	5.84338e-07	37.2421
546611	11.7898	5.21727	1.16646	4.47274	7.72223e-06	2.7262e-05	37.2009
15550	11.6101	5.21697	1.15173	4.52967	5.90759e-06	2.11896e-05	37.1932
93728	12.6195	5.21504	1.27863	4.07862	4.53042e-05	0.000141992	37.1436
110789	926.891	5.21409	0.568027	9.17931	4.33858e-20	7.33835e-19	37.1192
20257	11181.2	5.2137	0.638741	8.16247	3.28252e-16	3.91604e-15	37.1091
207618	12.4482	5.21199	1.26212	4.12956	3.63455e-05	0.000115655	37.0651
74144	11.5398	5.21187	1.1447	4.55304	5.2875e-06	1.91545e-05	37.062
243753	11.5295	5.20974	1.14006	4.56971	4.88394e-06	1.77831e-05	37.0073
20423	123.421	5.20806	1.18356	4.40034	1.08081e-05	3.72711e-05	36.9643
216860	3090.47	5.20787	0.381479	13.6518	1.97026e-42	1.37716e-40	36.9594
75641	11.7493	5.20785	1.18167	4.40719	1.04722e-05	3.61968e-05	36.959
30051	11.5338	5.20699	1.14987	4.52834	5.94486e-06	2.13139e-05	36.937
140904	21.0838	5.20587	1.05728	4.92383	8.48674e-07	3.45899e-06	36.9083
244885	36.5231	5.20496	0.860401	6.04946	1.45335e-09	8.59089e-09	36.885
67968	11.6191	5.20079	1.16943	4.4473	8.69571e-06	3.04816e-05	36.7784
77134	6117.16	5.20076	0.33794	15.3896	1.92196e-53	2.34593e-51	36.7777
18993	1706.42	5.20022	0.650798	7.99054	NA	NA	36.7641
72778	11.6948	5.20002	1.18011	4.4064	1.05105e-05	3.63061e-05	36.7588
20532	11.4691	5.19473	1.15179	4.51012	6.47905e-06	2.31025e-05	36.6244
14166	87.7795	5.19168	0.623789	8.32282	8.58944e-17	1.08318e-15	36.547
99296	111.234	5.1915	0.696705	7.45149	9.22895e-14	8.64046e-13	36.5423
237940	173.426	5.18876	0.723534	7.17142	7.42245e-13	6.39966e-12	36.4731
434147	407.638	5.17936	0.639393	8.10043	5.47662e-16	6.37597e-15	36.2361
209776	20.633	5.17321	1.05895	4.88522	1.03315e-06	4.15089e-06	36.082
232370	2825.38	5.17251	0.475166	10.8857	1.34854e-27	3.77684e-26	36.0646
69737	826.464	5.17232	0.453626	11.4022	4.07904e-30	1.35328e-28	36.0598
171209	11.2207	5.17191	1.14209	4.52847	5.94132e-06	2.13059e-05	36.0496
74293	18.5974	5.16959	0.970215	5.32829	9.91392e-08	4.59094e-07	35.9916
13498	3219.14	5.16655	0.53025	9.74361	1.96444e-22	3.90881e-21	35.9159
100504714	11.2679	5.16647	1.15377	4.47788	7.53868e-06	2.66658e-05	35.9139
100503674	11.2337	5.16614	1.15137	4.48695	7.2251e-06	2.56065e-05	35.9057
83556	12.1159	5.16364	1.27751	4.04194	5.30106e-05	0.000164088	35.8435
14176	11.2271	5.15778	1.16626	4.42251	9.75625e-06	3.3894e-05	35.6983
20979	2434.15	5.15707	0.506271	10.1864	2.28092e-24	5.1316e-23	35.6807
217882	2890.06	5.15267	0.542423	9.49936	2.11176e-21	3.92945e-20	35.572
100038555	11.3365	5.15226	1.18462	4.34928	1.36585e-05	4.65123e-05	35.5619
667127	12.7874	5.14913	1.37076	3.75642	0.000172364	0.000489613	35.4848
330086	11.381	5.14571	1.19971	4.28914	1.79366e-05	5.97254e-05	35.4007
667705	11.2176	5.14455	1.17867	4.36472	1.27286e-05	4.34906e-05	35.3725
67349	10.9139	5.14218	1.1339	4.53494	5.762e-06	2.06992e-05	35.3142
333654	34.7261	5.13999	0.83271	6.1726	6.7175e-10	4.11812e-09	35.2607
12322	294.937	5.13394	0.604764	8.48916	2.08137e-17	2.76098e-16	35.1131
24050	8885.21	5.12891	0.220616	23.2482	1.48475e-119	1.51778e-116	34.9909
381835	10.9685	5.12831	1.16139	4.41566	1.00701e-05	3.49102e-05	34.9764
15426	6236.63	5.12675	0.72721	7.04989	1.79063e-12	1.47396e-11	34.9386
234214	2113.03	5.12453	0.383956	13.3467	1.23853e-40	7.70245e-39	34.8849
383348	11.1098	5.11765	1.19426	4.28521	1.82564e-05	6.07161e-05	34.7189
75746	61.0187	5.11733	0.720346	7.10399	1.21206e-12	1.01873e-11	34.7112
268319	75.2981	5.11585	0.624192	8.19596	2.48611e-16	2.99432e-15	34.6756
241624	10.9832	5.11292	1.18289	4.3224	1.54341e-05	5.20601e-05	34.6053
654805	10.9544	5.11132	1.17327	4.35648	1.3217e-05	4.50747e-05	34.5669
414111	10.9805	5.11023	1.18186	4.3239	1.53298e-05	5.17405e-05	34.5409
243743	1612.33	5.10895	0.466333	10.9556	6.24785e-28	1.79281e-26	34.5102
791411	10.6159	5.10745	1.12737	4.53039	5.8874e-06	2.11264e-05	34.4744
19377	2506.52	5.10369	0.670241	7.61471	2.64278e-14	2.60551e-13	34.3847
18846	4759.71	5.10125	0.688178	7.41269	1.23767e-13	1.14563e-12	34.3265
235604	140.956	5.10013	0.633124	8.0555	7.91561e-16	9.07273e-15	34.2997
19041	19.4256	5.09781	1.1482	4.43982	9.00347e-06	3.14811e-05	34.2447
246198	2543.05	5.09521	0.517674	9.84251	7.38451e-23	1.51926e-21	34.183
381347	11.3829	5.09117	1.26746	4.01684	5.89832e-05	0.00018117	34.0875
50779	17.7818	5.0907	0.992044	5.13152	2.87408e-07	1.24532e-06	34.0763
76992	336.902	5.08829	0.712628	7.14018	9.32114e-13	7.94045e-12	34.0195
68016	102.142	5.0882	0.57457	8.85568	8.31754e-19	1.2738e-17	34.0175
330921	10.4862	5.08767	1.13098	4.49848	6.84414e-06	2.43142e-05	34.0049
233020	17.5788	5.0875	0.979078	5.19621	2.03387e-07	9.03232e-07	34.0009
20464	43.6246	5.08574	1.43551	3.54281	0.000395893	0.00105649	33.9595
72668	453.135	5.08232	0.357079	14.2331	5.71301e-46	4.84156e-44	33.879
100515	1587.68	5.07623	0.353895	14.3439	1.16406e-46	1.02916e-44	33.7362
142682	3281.6	5.07048	0.339238	14.9467	1.63698e-50	1.80908e-48	33.6021
12326	284.589	5.06959	0.697734	7.26578	3.70879e-13	3.28118e-12	33.5813
100862065	178.401	5.0677	0.89727	5.64791	1.62411e-08	8.36658e-08	33.5374
100503954	10.6085	5.06749	1.18129	4.28977	1.78856e-05	5.95798e-05	33.5325
230899	17.1813	5.06465	0.961624	5.26676	1.38851e-07	6.29971e-07	33.4665
319229	10.493	5.06389	1.16997	4.32822	1.50322e-05	5.08516e-05	33.449
20779	1911.08	5.06344	0.455991	11.1043	1.19616e-28	3.65008e-27	33.4385
319781	10.6448	5.05639	1.20042	4.21219	2.52909e-05	8.23526e-05	33.2755
116731	10.2423	5.05524	1.13555	4.45178	8.51595e-06	2.98963e-05	33.2489
22044	10.3582	5.05376	1.15378	4.38017	1.18589e-05	4.06547e-05	33.215
101809	724.885	5.05323	0.350806	14.4046	4.83868e-47	4.30117e-45	33.2027
100503655	10.434	5.05314	1.17634	4.29564	1.7419e-05	5.81916e-05	33.2007
238323	379.847	5.04718	0.469606	10.7477	6.07578e-27	1.64529e-25	33.0639
215493	47.9266	5.04393	0.746568	6.75615	1.41703e-11	1.06073e-10	32.9893
22750	367.907	5.04144	0.422793	11.9241	8.86132e-33	3.37846e-31	32.9325
56707	85.225	5.04067	0.627761	8.0296	9.77942e-16	1.10541e-14	32.9148
224224	10.3243	5.03721	1.16909	4.30865	1.64257e-05	5.51321e-05	32.8361
56089	89.6027	5.03607	0.779307	6.46224	1.03164e-10	6.97826e-10	32.8101
545091	10.2558	5.034	1.1633	4.32735	1.50916e-05	5.09996e-05	32.7631
78977	10.0226	5.02376	1.1379	4.41494	1.01039e-05	3.50182e-05	32.5315
13175	6729.1	5.01681	0.324235	15.4728	5.29913e-54	6.66712e-52	32.3749
17919	72.4995	5.01658	0.56323	8.9068	5.25271e-19	8.15117e-18	32.3698
224661	10.2752	5.01189	1.19372	4.19855	2.68631e-05	8.70909e-05	32.2647
67252	24.3949	5.01029	0.929924	5.38785	7.13074e-08	3.37082e-07	32.229
231691	9.86924	5.00145	1.13734	4.3975	1.09507e-05	3.7731e-05	32.0321
24131	10.0165	4.99971	1.165	4.2916	1.77394e-05	5.91409e-05	31.9937
100041581	10.2007	4.99293	1.20968	4.12749	3.66752e-05	0.000116609	31.8435
232875	298.318	4.98872	0.918782	5.42971	5.64464e-08	2.7011e-07	31.7507
320593	10.1285	4.98334	1.21295	4.10845	3.98324e-05	0.000125894	31.6325
435366	10.0637	4.98227	1.19968	4.153	3.28151e-05	0.000105055	31.6092
194309	599.399	4.97874	0.452151	11.0112	3.37371e-28	9.92455e-27	31.5318
100503966	141.74	4.97755	0.809547	6.14855	7.81928e-10	4.75259e-09	31.5058
18514	4000.57	4.97548	0.628833	7.91224	2.52808e-15	2.72572e-14	31.4606
56522	9.78009	4.97037	1.16107	4.28087	1.86168e-05	6.18517e-05	31.3495
99439	9.85143	4.96952	1.18441	4.19578	2.71933e-05	8.80914e-05	31.331
791396	9.85482	4.96596	1.17922	4.21122	2.53996e-05	8.26738e-05	31.2538
107448	1424.65	4.96024	0.436978	11.3512	7.31227e-30	2.38246e-28	31.13
75646	1015.53	4.95749	0.475747	10.4204	2.00018e-25	4.84666e-24	31.0709
15424	815.433	4.95306	0.65015	7.61834	2.56968e-14	2.53649e-13	30.9756
81840	697.428	4.95294	0.558077	8.87501	6.99269e-19	1.07493e-17	30.973
20528	22.8424	4.95288	1.15563	4.28587	1.82028e-05	6.05748e-05	30.9717
77889	3536.28	4.95048	0.205598	24.0784	4.20884e-128	5.29536e-125	30.9202
434784	9.88204	4.94935	1.20961	4.09167	4.28269e-05	0.000134863	30.896
27223	7354.36	4.94614	0.553853	8.93042	4.24393e-19	6.62345e-18	30.8275
192157	1791.65	4.94445	0.474156	10.4279	1.84905e-25	4.50717e-24	30.7914
100038538	16.1089	4.94299	1.01239	4.88251	1.04743e-06	4.20101e-06	30.7601
66196	284.722	4.94208	0.853983	5.78709	7.16143e-09	3.86193e-08	30.7407
319358	66.8421	4.94098	0.611176	8.08437	6.24855e-16	7.23293e-15	30.7172
56544	9.46173	4.94011	1.14742	4.30539	1.66694e-05	5.58241e-05	30.6987
11925	10.3749	4.93992	1.29696	3.80884	0.000139622	0.000403187	30.6947
69379	9.64588	4.93783	1.18844	4.15488	3.25463e-05	0.000104296	30.6503
100042948	37.2129	4.93738	0.706149	6.99198	2.7104e-12	2.19245e-11	30.6407
73598	9.53101	4.93711	1.16175	4.2497	2.14058e-05	7.05305e-05	30.635
245297	73.157	4.93514	0.587886	8.39473	4.6696e-17	6.03763e-16	30.5932
68617	1197.36	4.93306	0.406161	12.1456	6.05357e-34	2.5453e-32	30.5492
20377	527.951	4.93107	0.477023	10.3372	4.78473e-25	1.12765e-23	30.507
554327	15.9131	4.93086	0.99941	4.93377	8.06582e-07	3.29811e-06	30.5025
15464	9.7042	4.93054	1.20184	4.10248	4.08746e-05	0.000129112	30.4958
240427	2008.16	4.92244	0.579995	8.48704	2.11966e-17	2.80949e-16	30.3252
330164	29.6838	4.92011	0.821263	5.99091	2.08672e-09	1.20645e-08	30.2762
217194	310.524	4.91894	0.611058	8.04988	8.28755e-16	9.47911e-15	30.2516
77976	1585.8	4.91202	0.473234	10.3797	3.06811e-25	7.31516e-24	30.1068
100503874	9.56918	4.91056	1.20874	4.06256	4.85377e-05	0.000151273	30.0764
270160	16.1454	4.90845	1.06605	4.60435	4.13752e-06	1.52555e-05	30.0325
58220	263.083	4.90845	0.71216	6.89234	5.48805e-12	4.29281e-11	30.0324
20563	3858.97	4.90708	1.06334	4.61477	3.93535e-06	1.45543e-05	30.0039
70296	1449.7	4.9027	0.515441	9.51166	1.87641e-21	3.50349e-20	29.9129
22771	234.199	4.90064	0.595516	8.22922	1.88433e-16	2.2983e-15	29.8702
238037	58.4849	4.89776	0.655537	7.47138	7.93559e-14	7.48959e-13	29.8108
21349	145.976	4.8966	0.985398	4.96916	6.72434e-07	2.77665e-06	29.7868
100042547	43.553	4.89545	0.797447	6.13891	8.30922e-10	5.0354e-09	29.763
23850	58.6558	4.88919	0.872117	5.60612	2.06908e-08	1.05525e-07	29.6343
381196	9.13664	4.88613	1.15488	4.23085	2.3281e-05	7.62331e-05	29.5713
100039307	9.26359	4.88506	1.1832	4.12867	3.64862e-05	0.00011608	29.5495
230085	400.273	4.88248	0.760247	6.42223	1.34291e-10	8.95422e-10	29.4967
330230	9.15771	4.88023	1.16582	4.1861	2.83786e-05	9.17493e-05	29.4506
70059	199.476	4.87376	0.502598	9.69713	3.10104e-22	6.04536e-21	29.3188
320271	730.199	4.87374	0.853597	5.70966	1.13204e-08	5.94405e-08	29.3186
100502846	9.19267	4.87306	1.1835	4.11748	3.83036e-05	0.00012132	29.3047
675921	9.89562	4.87259	1.30281	3.74006	0.000183976	0.000520699	29.2952
373852	9.10436	4.8705	1.1653	4.17962	2.91997e-05	9.4125e-05	29.2527
12064	28.9024	4.86733	0.774672	6.28309	3.31916e-10	2.1132e-09	29.1886
723926	9.04094	4.86567	1.16384	4.1807	2.90607e-05	9.37323e-05	29.1551
211480	9.13475	4.86309	1.1828	4.11152	3.93066e-05	0.000124328	29.1029
71751	1075.88	4.862	0.53274	9.12639	7.08193e-20	1.17835e-18	29.0808
403174	20.9321	4.85607	1.14453	4.24284	2.2071e-05	7.25006e-05	28.9617
100041241	9.21547	4.85591	1.21284	4.00376	6.23429e-05	0.000190737	28.9583
56805	787.108	4.85447	0.466308	10.4104	2.22215e-25	5.36069e-24	28.9295
320256	20.9454	4.84624	1.14891	4.21813	2.46332e-05	8.03231e-05	28.765
53608	15.0955	4.83893	1.03056	4.69544	2.66035e-06	1.01e-05	28.6196
100504659	9.03869	4.83157	1.20962	3.99429	6.48881e-05	0.000198265	28.474
238024	188.689	4.83072	0.361156	13.3757	8.38615e-41	5.31643e-39	28.4572
277432	1814.34	4.8242	1.09112	4.42131	9.81047e-06	3.4068e-05	28.3288
74356	2080.36	4.82338	0.354636	13.6009	3.9536e-42	2.6832e-40	28.3127
23828	21.728	4.81972	0.857599	5.62002	1.90941e-08	9.7625e-08	28.241
100503435	49.4177	4.81578	0.61076	7.8849	3.14795e-15	3.37183e-14	28.1639
623174	8.69165	4.81315	1.16481	4.13215	3.59389e-05	0.000114413	28.1128
58991	15.39	4.81231	1.02445	4.69744	2.63438e-06	1.00158e-05	28.0963
20346	638.856	4.80821	0.86118	5.58328	2.36027e-08	1.19113e-07	28.0166
237465	8.53094	4.80689	1.1369	4.22808	2.35698e-05	7.71016e-05	27.9911
23920	10.0682	4.80219	1.40555	3.41659	0.000634114	0.00163383	27.9
14234	9.53058	4.79991	1.33075	3.60693	0.000309841	0.00084252	27.8559
54418	883.686	4.79746	0.457817	10.479	1.07879e-25	2.70624e-24	27.8087
625464	9.00285	4.79607	1.24156	3.86294	0.000112032	0.000328385	27.7819
65969	14.9438	4.79104	1.00713	4.75714	1.96352e-06	7.58153e-06	27.6852
15415	1325.31	4.78876	0.615549	7.77966	7.27218e-15	7.52333e-14	27.6414
387133	8.51945	4.77425	1.17911	4.04903	5.14312e-05	0.000159622	27.3648
16508	492.702	4.77168	0.619637	7.70077	1.35253e-14	1.36303e-13	27.316
245884	8.46874	4.77072	1.17219	4.06992	4.70283e-05	0.000146793	27.2979
26459	8.51908	4.76974	1.18702	4.01825	5.86318e-05	0.000180226	27.2793
666772	14.2347	4.76929	0.971789	4.90774	9.21304e-07	3.73361e-06	27.2709
12355	8.40214	4.76746	1.16458	4.09371	4.2453e-05	0.000133788	27.2363
240518	105.395	4.76256	0.761029	6.25804	3.89834e-10	2.46563e-09	27.1439
74426	8.79846	4.76249	1.24636	3.8211	0.000132856	0.000384736	27.1426
329160	8.44232	4.76234	1.17643	4.04813	5.16292e-05	0.000160206	27.1398
227058	75.9644	4.75953	0.740508	6.42738	1.29821e-10	8.67028e-10	27.087
217951	8.66752	4.75086	1.23527	3.84602	0.000120054	0.000350142	26.9248
108083	3373.22	4.74776	0.504093	9.41842	4.57938e-21	8.38749e-20	26.8669
20264	10.3875	4.74724	1.48795	3.19046	0.00142048	0.00341819	26.8572
23794	106.151	4.74372	0.718754	6.59992	4.11374e-11	2.93434e-10	26.7918
11434	34.6289	4.74303	0.719112	6.59567	4.23328e-11	3.01434e-10	26.779
26918	14.227	4.74282	0.992958	4.77645	1.78414e-06	6.92814e-06	26.7751
83395	8.21692	4.73397	1.17104	4.04252	5.288e-05	0.000163715	26.6113
236266	315.194	4.72894	0.637114	7.42243	1.14987e-13	1.06678e-12	26.5187
14617	217.032	4.72815	0.892871	5.29544	1.18729e-07	5.43503e-07	26.5042
239017	821.827	4.72515	0.37905	12.4658	1.14757e-35	5.47218e-34	26.4492
230576	8.32037	4.72311	1.20609	3.91607	9.00058e-05	0.000268638	26.4118
100503830	9.30159	4.72299	1.37955	3.42358	0.000618021	0.00159564	26.4096
100504427	13.7978	4.71915	1.03114	4.57662	4.72547e-06	1.72483e-05	26.3394
328906	8.11231	4.71308	1.16804	4.03503	5.45944e-05	0.00016848	26.2287
20533	11.0204	4.71049	1.56796	3.00421	0.00266271	0.00607155	26.1818
78257	84.8344	4.70985	0.73264	6.4286	1.28786e-10	8.60471e-10	26.1702
56788	112.574	4.7081	0.719142	6.54683	5.87702e-11	4.08867e-10	26.1384
17769	1032.11	4.70557	0.644991	7.29555	2.97439e-13	2.65987e-12	26.0926
74202	518.092	4.70274	0.310045	15.1679	5.76662e-52	6.73706e-50	26.0415
20840	26.435	4.70244	1.00585	4.6751	2.93806e-06	1.10777e-05	26.036
20508	454.503	4.70094	1.06502	4.41394	1.01504e-05	3.5144e-05	26.009
56869	38.9632	4.70065	0.829169	5.66911	1.43541e-08	7.45086e-08	26.0037
83885	8.14392	4.6976	1.20692	3.89221	9.93366e-05	0.000294285	25.9488
435965	2712.33	4.69759	0.543017	8.6509	5.10968e-18	7.19225e-17	25.9486
67040	11195.3	4.69731	0.387758	12.114	8.9003e-34	3.7231e-32	25.9437
227717	8.28588	4.69168	1.24288	3.77484	0.00016011	0.000457744	25.8427
11498	7.95335	4.69045	1.16217	4.03594	5.43843e-05	0.000167927	25.8206
140494	7.89805	4.68359	1.16518	4.01963	5.82898e-05	0.000179275	25.6981
382207	180.54	4.68212	0.775679	6.03617	1.5782e-09	9.28859e-09	25.672
67468	1503.2	4.68199	0.223365	20.9612	1.48387e-97	8.36905e-95	25.6696
546387	20.5476	4.68072	0.910918	5.13847	2.76988e-07	1.2049e-06	25.647
20286	4367.57	4.6794	0.51988	9.00093	2.23823e-19	3.58205e-18	25.6235
73016	8.73162	4.67626	1.34548	3.47553	0.000509847	0.0013381	25.568
73729	373.714	4.67609	0.626429	7.46468	8.3504e-14	7.85389e-13	25.5648
22114	7.88203	4.67117	1.17257	3.9837	6.78508e-05	0.000206776	25.4779
83766	1782.93	4.66965	0.586238	7.96546	1.64613e-15	1.80215e-14	25.4511
110542	7.86423	4.66722	1.17762	3.96328	7.39276e-05	0.000223794	25.4082
14187	27.9517	4.65252	0.976976	4.76216	1.91531e-06	7.40588e-06	25.1506
553095	161.158	4.65163	0.888394	5.23599	1.64101e-07	7.37169e-07	25.135
381338	1802.62	4.65138	0.602219	7.72372	NA	NA	25.1306
13384	931.816	4.65084	0.389078	11.9535	6.22519e-33	2.41278e-31	25.1214
108797	2400.97	4.64993	0.613517	7.57914	3.47855e-14	3.38863e-13	25.1055
11549	18.8196	4.64829	0.924555	5.0276	4.96667e-07	2.0806e-06	25.0769
74366	205.816	4.64716	0.523689	8.87389	7.06374e-19	1.0828e-17	25.0572
209186	44.6652	4.64626	0.601697	7.72191	1.14596e-14	1.16636e-13	25.0416
382793	437.244	4.64489	0.514172	9.03373	1.65922e-19	2.67372e-18	25.0179
211147	64.9793	4.64485	0.741321	6.26563	3.71317e-10	2.35398e-09	25.0172
100038627	7.84605	4.64073	1.20756	3.84306	0.000121507	0.000353877	24.9459
109202	7.95562	4.63371	1.23702	3.74587	0.000179766	0.000509312	24.8248
214240	3960.36	4.62893	0.523103	8.84898	8.83233e-19	1.34633e-17	24.7427
232790	7.53065	4.6266	1.15084	4.0202	5.81491e-05	0.00017891	24.7028
100504153	7.71816	4.62544	1.2002	3.8539	0.000116252	0.000339963	24.6829
14186	13.1105	4.62514	0.997673	4.63592	3.55347e-06	1.32363e-05	24.6777
242408	7.57601	4.62467	1.1671	3.96253	7.41596e-05	0.000224413	24.6698
26945	7.53215	4.62456	1.15829	3.99256	6.53643e-05	0.000199533	24.6678
18216	18.6372	4.62434	0.869089	5.3209	1.03256e-07	4.76945e-07	24.664
18675	7.68603	4.62376	1.19083	3.88282	0.000103253	0.000305168	24.6541
225518	8.50711	4.62279	1.36406	3.38899	0.000701499	0.00179389	24.6376
67451	13.5386	4.62151	1.0397	4.44505	8.78712e-06	3.07888e-05	24.6158
15427	357.736	4.62108	1.64484	2.80944	0.00496282	0.0106637	24.6084
14171	7.66526	4.62107	1.19267	3.87458	0.00010681	0.000314659	24.6083
54648	732.295	4.6204	0.309824	14.913	2.71284e-50	2.86266e-48	24.5968
69640	12.8506	4.61739	0.982428	4.69998	2.60189e-06	9.89685e-06	24.5455
54631	8.02277	4.61718	1.27069	3.63359	0.000279502	0.000766779	24.5419
236690	7.4642	4.6166	1.14748	4.02325	5.7401e-05	0.000176841	24.5322
78016	7.4817	4.61209	1.15296	4.00023	6.32797e-05	0.000193531	24.4556
231045	7.67654	4.61071	1.21169	3.80517	0.000141706	0.000408629	24.4321
245174	85.9157	4.60658	0.474944	9.69921	3.03855e-22	5.9377e-21	24.3624
12890	1027.07	4.60614	0.501576	9.18334	4.17923e-20	7.07613e-19	24.355
78339	9400.44	4.60552	0.336438	13.689	1.18043e-42	8.32206e-41	24.3445
71030	9.14295	4.60416	1.4745	3.12252	0.00179308	0.00422162	24.3214
56527	3409.06	4.60277	0.540584	8.51444	1.67403e-17	2.23879e-16	24.2981
100503253	7.39679	4.60042	1.15708	3.97587	7.01213e-05	0.000213021	24.2585
67445	1131.93	4.5965	0.611715	7.51413	5.72895e-14	5.48932e-13	24.1928
234857	604.425	4.59635	0.451036	10.1907	2.18293e-24	4.91792e-23	24.1902
15478	7.62603	4.59316	1.21972	3.76576	0.000166045	0.00047306	24.1367
100861934	7.63122	4.59305	1.22109	3.76143	0.000168943	0.000480561	24.1349
624713	7.45353	4.59098	1.18519	3.87362	0.000107231	0.000315615	24.1004
18782	7.87255	4.59025	1.27889	3.58924	0.000331639	0.000896872	24.0882
18992	629.159	4.58793	0.758973	6.04492	1.49484e-09	8.82022e-09	24.0494
72514	661.409	4.58723	0.426305	10.7604	5.29114e-27	1.44236e-25	24.0378
69441	7.68677	4.58592	1.24566	3.68153	0.000231839	0.000644343	24.0159
171166	7.48531	4.58572	1.19632	3.83318	0.000126499	0.000367303	24.0126
320590	7.49962	4.58517	1.19697	3.83064	0.00012781	0.000370978	24.0035
382522	56.9168	4.58491	0.718176	6.38411	1.724e-10	1.13335e-09	23.9992
100038509	7.39069	4.58042	1.18327	3.871	0.000108392	0.000318515	23.9246
627967	21.9841	4.57778	0.98081	4.66735	3.0511e-06	1.14668e-05	23.8808
66343	87.4519	4.57702	0.74471	6.14605	7.94364e-10	4.82638e-09	23.8683
73628	7.41696	4.57675	1.18752	3.85403	0.00011619	0.000339843	23.8638
93876	97.185	4.5763	0.509626	8.97972	2.71447e-19	4.32306e-18	23.8563
60425	166.044	4.56747	0.71126	6.42167	1.3479e-10	8.98377e-10	23.7108
20371	8.00594	4.56677	1.33207	3.42832	0.000607324	0.00157174	23.6993
100038378	7.18297	4.56344	1.15321	3.95717	7.58418e-05	0.00022908	23.6445
666955	7.6536	4.56323	1.26373	3.61093	0.000305099	0.000831007	23.6412
216848	10005.4	4.56278	0.430012	10.6108	2.65369e-26	6.92244e-25	23.6338
218030	55.6256	4.56224	0.775932	5.8797	4.11018e-09	2.29206e-08	23.625
74055	141.104	4.55901	0.894635	5.09594	3.4701e-07	1.48617e-06	23.5721
12014	2880.69	4.55788	0.653903	6.97026	3.16348e-12	2.5426e-11	23.5537
21892	39.6246	4.5577	0.86326	5.27964	1.29439e-07	5.89559e-07	23.5508
214575	7.32494	4.55712	1.19246	3.82161	0.000132581	0.000384213	23.5413
20983	1092.38	4.5529	0.49638	9.17219	4.63502e-20	7.8155e-19	23.4724
237175	14.1522	4.55177	1.15789	3.9311	8.45576e-05	0.000253533	23.4542
21410	7.32511	4.54343	1.21712	3.73293	0.000189266	0.000534192	23.3189
54120	17.8016	4.54192	0.903403	5.02757	4.96745e-07	2.0806e-06	23.2945
628686	7.48516	4.54148	1.25734	3.61197	0.000303881	0.000828241	23.2874
17537	2091.7	4.53899	0.485959	9.34027	9.60909e-21	1.71738e-19	23.2473
68215	633.874	4.53848	0.337141	13.4617	2.62882e-41	1.71988e-39	23.2391
212712	55.0778	4.53707	0.687988	6.5947	4.26127e-11	3.03295e-10	23.2164
23965	1871.71	4.53473	0.500149	9.06676	1.22606e-19	2.01137e-18	23.1787
73710	17024.2	4.53466	0.35175	12.8917	5.01223e-38	2.71457e-36	23.1776
70357	581.514	4.53308	0.373163	12.1477	5.89962e-34	2.49339e-32	23.1522
69097	7.23553	4.53299	1.20704	3.75546	0.000173023	0.000491328	23.1508
12944	7.75807	4.53055	1.32914	3.40862	0.000652919	0.00167911	23.1117
100310813	7.03381	4.5298	1.16067	3.90274	9.51108e-05	0.000282739	23.0996
73333	7.09809	4.52719	1.17854	3.84137	0.000122351	0.000356143	23.0579
11682	279.511	4.52512	0.556051	8.13795	4.02012e-16	4.74409e-15	23.0249
100504425	62.0142	4.52369	0.665176	6.80075	1.04078e-11	7.8774e-11	23.002
21677	350.02	4.52301	0.776593	5.82418	5.73943e-09	3.13541e-08	22.9913
14428	16.4049	4.5227	1.13979	3.96802	7.24717e-05	0.000219794	22.9862
13857	7.03047	4.52105	1.16819	3.87013	0.000108778	0.000319536	22.96
381352	160.079	4.51876	0.560038	8.06867	7.10695e-16	8.186e-15	22.9236
320095	11.8133	4.51769	1.01382	4.4561	8.34655e-06	2.93331e-05	22.9066
80515	965.864	4.51173	0.471828	9.56223	1.15249e-21	2.18679e-20	22.8121
100502868	7.22397	4.51015	1.23755	3.64443	0.000267983	0.000737651	22.7872
77963	609.8	4.50646	0.486592	9.26127	2.02009e-20	3.53375e-19	22.7289
320230	7.07873	4.50599	1.19736	3.76328	0.000167699	0.000477523	22.7215
213262	887.764	4.5051	1.04319	4.3186	1.57025e-05	5.28347e-05	22.7075
70122	1748.47	4.50355	0.322344	13.9712	2.33511e-44	1.80156e-42	22.6832
22249	1487.46	4.50138	0.412676	10.9078	1.05797e-27	2.98863e-26	22.649
22718	1247.14	4.49706	0.519381	8.6585	4.78005e-18	6.7632e-17	22.5814
20471	9.24737	4.49527	1.57193	2.85971	0.00424027	0.00924964	22.5533
246190	6.9712	4.48946	1.19641	3.75243	0.000175129	0.000497119	22.4627
330627	6.86335	4.48337	1.17662	3.81036	0.000138762	0.000400847	22.3681
245555	1051.79	4.48275	0.611725	7.32804	2.33548e-13	2.11395e-12	22.3584
64213	949.348	4.48253	0.504352	8.8877	6.23891e-19	9.60863e-18	22.3551
100504361	7.77534	4.48251	1.38656	3.23284	0.00122566	0.00299566	22.3548
11944	7.15299	4.4813	1.25769	3.56311	0.000366487	0.000982827	22.336
13866	87.4002	4.47967	0.545262	8.21563	2.11053e-16	2.55892e-15	22.3108
75665	382.117	4.47755	0.534018	8.38463	5.08834e-17	6.56866e-16	22.278
22240	13463	4.4774	0.484911	9.23344	2.62086e-20	4.51704e-19	22.2757
100503083	79.4393	4.47483	0.621997	7.19429	6.27883e-13	5.46549e-12	22.236
56370	5175.01	4.47304	0.517168	8.64912	5.18999e-18	7.28023e-17	22.2085
240239	7.02484	4.47273	1.22922	3.63869	0.000274033	0.000753166	22.2038
433292	7.54858	4.4712	1.3571	3.29467	0.000985363	0.00245343	22.1803
12348	340.588	4.47039	0.342958	13.0348	7.7581e-39	4.33077e-37	22.1677
75913	130.413	4.4702	0.644252	6.93859	3.96044e-12	3.14146e-11	22.1648
57752	2385.17	4.46877	0.456035	9.79918	1.13501e-22	2.30325e-21	22.1429
237611	42.4807	4.46251	0.648672	6.87946	6.00799e-12	4.66474e-11	22.047
100042450	22.6916	4.45985	0.786603	5.66976	1.42995e-08	7.42487e-08	22.0064
432530	1101.18	4.45713	0.653266	6.82285	8.9252e-12	6.78979e-11	21.965
212728	84.4683	4.45574	0.811279	5.49225	3.96856e-08	1.93876e-07	21.9438
72475	5402.17	4.45553	0.179509	24.8206	5.37495e-136	7.99207e-133	21.9406
320022	6.86045	4.4528	1.21592	3.66208	0.00025018	0.000691673	21.8992
435529	6.90824	4.45152	1.22918	3.62152	0.000292872	0.000800371	21.8796
269019	927.415	4.45094	0.437852	10.1654	2.82927e-24	6.33911e-23	21.8709
238988	1598.05	4.44876	0.542753	8.19666	2.47153e-16	2.97895e-15	21.8379
14299	4368.66	4.44864	0.466818	9.52971	1.5772e-21	2.96854e-20	21.8361
245050	21.3939	4.44769	0.980331	4.53693	5.70792e-06	2.05274e-05	21.8217
433766	6.75239	4.44303	1.20414	3.6898	0.000224434	0.00062557	21.7514
66719	6.73021	4.44005	1.1967	3.71023	0.000207071	0.000580935	21.7064
69884	6.70526	4.43737	1.19805	3.70382	0.000212375	0.000594796	21.6661
100861986	53.69	4.43614	0.593591	7.47339	7.8153e-14	7.38458e-13	21.6477
73167	11.6165	4.43546	1.01637	4.36402	1.27695e-05	4.36029e-05	21.6374
271842	114.769	4.4345	0.634316	6.99101	2.72923e-12	2.20659e-11	21.6231
260315	1588.76	4.43211	0.594062	7.46069	8.60691e-14	8.07657e-13	21.5873
98736	28.9392	4.4302	0.779166	5.68581	1.30191e-08	6.77508e-08	21.5587
107515	459.099	4.42763	0.418142	10.5888	3.35837e-26	8.71897e-25	21.5203
245446	80.8916	4.42565	0.674469	6.56169	5.32024e-11	3.72189e-10	21.4909
100042132	7.26378	4.42443	1.35469	3.26601	0.00109076	0.0026933	21.4727
100038384	6.60668	4.42441	1.18096	3.74647	0.000179343	0.00050829	21.4724
14924	1834.07	4.42422	0.606981	7.28889	3.12517e-13	2.78709e-12	21.4695
387144	7.5133	4.41725	1.41222	3.12787	0.00176077	0.0041522	21.3661
14586	322.188	4.41637	0.521229	8.47299	2.39169e-17	3.15472e-16	21.353
100503607	78.6352	4.41554	0.698183	6.32432	2.54344e-10	1.64234e-09	21.3407
257635	86.9856	4.41342	0.751362	5.8739	4.25673e-09	2.36572e-08	21.3095
103889	876.761	4.41119	0.368927	11.9568	5.98126e-33	2.32374e-31	21.2766
53324	103.453	4.40984	0.860423	5.1252	2.97225e-07	1.28507e-06	21.2566
227526	6.43971	4.40891	1.15785	3.80783	0.000140189	0.000404469	21.243
14702	6633.25	4.40447	0.226089	19.4812	1.58638e-84	6.48672e-82	21.1776
19275	760.689	4.39949	0.483823	9.09319	9.61738e-20	1.58571e-18	21.1047
74376	73.9477	4.39754	0.636188	6.91232	4.76785e-12	3.74738e-11	21.0761
71027	6.68606	4.39631	1.24974	3.51778	0.000435167	0.00115414	21.0581
74405	6.56887	4.39624	1.21341	3.62305	0.000291149	0.00079646	21.0572
75860	6.43078	4.39468	1.17711	3.73345	0.000188873	0.000533174	21.0344
382221	6.57354	4.39372	1.22701	3.58082	0.000342519	0.000923852	21.0204
54609	2831.46	4.39113	0.295334	14.8684	5.28918e-50	5.51018e-48	20.9827
108015	107.754	4.3905	0.805972	5.44747	5.10925e-08	2.46075e-07	20.9736
100503381	7.15363	4.38821	1.37131	3.2	0.00137425	0.00331915	20.9402
21338	6.62014	4.38611	1.2377	3.54375	0.000394477	0.00105288	20.9098
14168	639.092	4.38417	0.407195	10.7668	4.94029e-27	1.35123e-25	20.8818
105827	57.2605	4.38321	0.761677	5.75468	8.68046e-09	4.60966e-08	20.8678
111975	6.62676	4.38124	1.25415	3.49339	0.000476936	0.00125738	20.8394
100126034	20.2935	4.37907	0.835684	5.24011	1.60482e-07	7.21706e-07	20.8081
100861711	6.62269	4.37899	1.25646	3.48518	0.000491808	0.00129283	20.8069
245596	93.132	4.37852	0.875711	4.99996	5.73422e-07	2.38406e-06	20.8002
319924	1674.72	4.37661	0.351088	12.4658	1.14689e-35	5.47218e-34	20.7725
19659	4239.93	4.37512	0.47823	9.14857	5.76929e-20	9.64852e-19	20.7511
70439	1380.93	4.37454	0.334989	13.0587	5.66532e-39	3.19524e-37	20.7428
378431	6.42135	4.37114	1.20141	3.63834	0.000274406	0.000754063	20.694
216438	987.484	4.36909	0.544732	8.02061	1.05222e-15	1.18282e-14	20.6645
74296	6.44275	4.36854	1.22481	3.5667	0.000361498	0.000970244	20.6568
11603	13070.5	4.36838	0.448286	9.74465	1.94451e-22	3.87387e-21	20.6545
67772	3321.83	4.36766	0.547679	7.97485	1.52564e-15	1.67923e-14	20.6441
240444	6.25002	4.36759	1.15652	3.7765	0.000159045	0.000455019	20.6432
67299	4197.98	4.36717	0.318715	13.7024	9.81628e-43	6.95043e-41	20.6371
70725	6.78913	4.36182	1.31953	3.30559	0.000947776	0.00236633	20.5608
268977	166.647	4.36149	0.625223	6.97589	3.0393e-12	2.44761e-11	20.556
239852	6.88579	4.36103	1.34209	3.24944	0.00115632	0.00284019	20.5495
69635	1818	4.36102	0.577436	7.5524	4.27323e-14	4.14549e-13	20.5494
223455	4375.19	4.35903	0.693418	6.2863	3.25115e-10	2.07313e-09	20.5211
328825	10.5128	4.35795	1.00608	4.3316	1.48028e-05	5.01585e-05	20.5056
208171	10.5	4.35776	1.00745	4.32552	1.52171e-05	5.13917e-05	20.503
353371	6.3533	4.35587	1.20232	3.62288	0.000291335	0.000796836	20.4761
12854	10.5435	4.35549	1.02119	4.2651	1.99817e-05	6.6158e-05	20.4707
27528	13843.2	4.35426	0.389065	11.1916	4.48374e-29	1.39158e-27	20.4532
14783	1561.99	4.35423	0.647086	6.72899	1.70849e-11	1.27019e-10	20.4529
57274	32.5488	4.35277	0.74737	5.82411	5.74177e-09	3.13564e-08	20.4321
67298	6381.28	4.35153	0.480892	9.04886	1.44465e-19	2.33716e-18	20.4146
15500	771.49	4.35116	0.392521	11.0852	1.48068e-28	4.47652e-27	20.4093
97487	554.06	4.34441	0.392574	11.0665	1.82433e-28	5.43512e-27	20.3141
100039768	180.619	4.33967	0.308642	14.0605	6.63697e-45	5.3475e-43	20.2475
100503134	6.20039	4.33798	1.18831	3.65053	0.000261697	0.000721198	20.2237
246313	15.3441	4.33518	1.18484	3.65888	0.000253322	0.000700006	20.1845
252974	6.11694	4.33312	1.16993	3.70374	0.000212444	0.000594888	20.1558
622675	1427.52	4.33068	0.500224	8.65749	4.82268e-18	6.81172e-17	20.1217
218440	42.9834	4.32908	0.717769	6.03129	1.62651e-09	9.53871e-09	20.0994
83396	724.597	4.32834	0.269752	16.0457	6.12974e-58	8.42505e-56	20.0891
268354	364.016	4.32827	0.435242	9.94452	2.66464e-23	5.61635e-22	20.0881
69547	6.16629	4.32459	1.20366	3.59286	0.000327064	0.000885671	20.037
170643	808.584	4.32105	0.386875	11.1691	5.77471e-29	1.7821e-27	19.9879
18476	2006.19	4.32093	0.363343	11.8921	1.3002e-32	4.94558e-31	19.9862
71746	15.0344	4.31975	0.87843	4.91759	8.76182e-07	3.56488e-06	19.9699
18082	1308.75	4.31853	0.393144	10.9846	4.53276e-28	1.31918e-26	19.953
381546	224.134	4.31157	0.379094	11.3733	5.67745e-30	1.86842e-28	19.8569
237558	6.08013	4.31098	1.19317	3.61306	0.000302608	0.000825185	19.8488
320749	26.0504	4.31022	0.880606	4.89461	9.85005e-07	3.9711e-06	19.8384
319998	745.215	4.30984	0.410779	10.4919	9.41482e-26	2.37637e-24	19.8332
72821	176.806	4.30454	0.356537	12.0732	1.46355e-33	5.92518e-32	19.7604
100862319	10.2077	4.30382	1.02837	4.18507	2.8508e-05	9.21314e-05	19.7505
70057	67.8494	4.30125	0.752324	5.71728	1.08243e-08	5.70003e-08	19.7154
78004	6.06176	4.30119	1.19789	3.59064	0.000329865	0.000892224	19.7146
18548	25.0737	4.30045	0.784383	5.48259	4.1915e-08	2.0434e-07	19.7044
269994	256.185	4.29943	0.970238	4.43131	9.36602e-06	3.26493e-05	19.6905
20564	525.107	4.29875	0.623507	6.89447	5.40675e-12	4.23326e-11	19.6812
320321	6.91633	4.29802	1.43112	3.00327	0.00267099	0.00608959	19.6713
233107	1342.29	4.29719	0.392128	10.9586	6.03965e-28	1.73916e-26	19.6599
68306	6.42957	4.29701	1.30785	3.28556	0.00101779	0.00252341	19.6575
338365	76.5944	4.29575	0.560176	7.66857	1.73918e-14	1.73769e-13	19.6404
106393	538.116	4.29559	0.521601	8.23541	1.78949e-16	2.19243e-15	19.6383
272381	2698.33	4.29416	0.384779	11.1601	6.39373e-29	1.96941e-27	19.6187
53420	463.534	4.29211	0.369236	11.6243	3.10186e-31	1.09577e-29	19.5908
96990	6.00964	4.29137	1.19335	3.59607	0.000323058	0.000875838	19.5808
100628593	114.195	4.29131	0.377914	11.3553	6.98371e-30	2.28035e-28	19.58
100042464	1015.46	4.29113	0.926389	4.6321	3.61971e-06	1.34493e-05	19.5776
16373	183.122	4.291	0.991504	4.32777	1.50626e-05	5.0912e-05	19.5758
16372	321.974	4.29019	0.919035	4.66815	3.03927e-06	1.14277e-05	19.5648	Irx2
11628	6.02921	4.28897	1.20237	3.56709	0.000360973	0.000969151	19.5483
12263	6.04041	4.28705	1.20852	3.54737	0.000389097	0.00103903	19.5224
545902	13.9773	4.2857	1.1435	3.74789	0.000178329	0.000505591	19.5041
382034	2459.53	4.28491	0.560168	7.64932	2.0205e-14	2.00773e-13	19.4933
436240	6.2583	4.28366	1.28286	3.33914	0.00084037	0.00211685	19.4765
215456	10.1113	4.283	1.03751	4.12817	3.65656e-05	0.00011631	19.4676
228858	2285.19	4.28266	0.649559	6.59318	4.30512e-11	3.0615e-10	19.463
100503152	23.9808	4.28141	0.743065	5.76183	8.32081e-09	4.4273e-08	19.4462
108013	3609.21	4.27993	0.586064	7.30284	2.81755e-13	2.52515e-12	19.4262
100504739	6.03515	4.27851	1.2234	3.49724	0.000470104	0.00124057	19.4071
72961	6.197	4.27727	1.27605	3.35195	0.000802435	0.00203073	19.3904
106763	1501.55	4.27705	0.555449	7.70017	1.35887e-14	1.36858e-13	19.3875
16469	157.438	4.27682	0.43713	9.78387	1.32063e-22	2.6634e-21	19.3844
77015	2018.59	4.27653	0.410962	10.4062	2.32417e-25	5.57392e-24	19.3805
260305	272.791	4.27578	0.322467	13.2596	3.97007e-40	2.39611e-38	19.3704
353504	7.02931	4.27469	1.47633	2.89549	0.00378561	0.00833794	19.3558
78616	9.87641	4.27369	0.997184	4.28576	1.82115e-05	6.05912e-05	19.3423
100042149	9.91351	4.27353	1.00501	4.25223	2.11648e-05	6.97928e-05	19.3402
15572	4510.56	4.27203	0.527964	8.09152	5.89231e-16	6.83993e-15	19.3201
791403	6.07319	4.26951	1.24281	3.43538	0.000591726	0.00153453	19.2864
230779	453.371	4.26594	0.363454	11.7372	8.216e-32	3.03343e-30	19.2387
16776	76.3303	4.26581	0.662194	6.44194	1.17957e-10	7.91996e-10	19.237
68169	121.173	4.26512	0.827307	5.15543	2.53053e-07	1.10696e-06	19.2278
100042235	14.3047	4.26502	0.914214	4.66523	3.08265e-06	1.15753e-05	19.2265
75740	25.9384	4.26225	0.792798	5.37621	7.60682e-08	3.57623e-07	19.1896
16000	209.461	4.2613	0.750599	5.6772	1.36915e-08	7.11595e-08	19.177
13172	6.25577	4.26004	1.31362	3.24298	0.00118288	0.00289975	19.1602
100861572	5.92207	4.25877	1.21754	3.49785	0.000469021	0.00123811	19.1433
26458	49.6369	4.25643	0.680624	6.25372	4.00792e-10	2.5281e-09	19.1123
74152	30.4425	4.25599	0.833158	5.10827	3.25124e-07	1.39813e-06	19.1065
330406	5.93291	4.25499	1.22212	3.48165	0.000498334	0.00130894	19.0933
14843	5.74905	4.25446	1.16185	3.66178	0.000250466	0.000692347	19.0862
242748	1866.88	4.24978	0.72865	5.83241	5.4634e-09	2.99562e-08	19.0245
216961	5.80955	4.24946	1.19183	3.56548	0.000363188	0.000974298	19.0202
333564	5.96842	4.24756	1.23921	3.42764	0.000608849	0.00157519	18.9952
59026	11134.8	4.24129	0.390295	10.8669	1.65747e-27	4.62621e-26	18.9128
12823	14.101	4.23969	0.92558	4.58057	4.63705e-06	1.69634e-05	18.8918
110333	280.523	4.23962	0.317393	13.3576	1.06908e-40	6.67401e-39	18.8909
19713	725.084	4.23863	0.64519	6.56958	5.04565e-11	3.54496e-10	18.8779
170738	107.142	4.23538	0.847611	4.99684	5.82764e-07	2.42044e-06	18.8355
68986	5.76182	4.23443	1.19529	3.54261	0.000396191	0.00105711	18.8231
233066	61.1132	4.23375	0.701964	6.03129	1.62653e-09	9.53871e-09	18.8142
16443	4281.16	4.22982	0.635963	6.65105	2.91013e-11	2.10891e-10	18.763
57764	130.569	4.22712	0.785948	5.37837	7.51652e-08	3.53887e-07	18.7279
70021	2433.76	4.22622	0.458295	9.22163	2.92617e-20	5.02209e-19	18.7163
236366	5.63738	4.22399	1.1712	3.60654	0.000310301	0.000843506	18.6873
12895	5.89019	4.22295	1.25911	3.35391	0.000796773	0.00201828	18.6738
100503519	6.12418	4.2228	1.31928	3.20084	0.00137028	0.00331003	18.672
545007	7.72618	4.22272	1.61266	2.61848	0.00883236	0.0178591	18.6709
18231	1518.49	4.22261	0.57323	7.36635	1.75368e-13	1.60511e-12	18.6695
100503362	5.91989	4.22157	1.26613	3.33423	0.000855372	0.00215172	18.656
12354	9.59185	4.22121	1.02771	4.10739	4.00163e-05	0.00012645	18.6514
272322	5.81177	4.22102	1.23671	3.41311	0.000642253	0.0016535	18.6489
71912	5.79169	4.21818	1.23168	3.42473	0.000615417	0.00159042	18.6123
72630	46.3411	4.2177	0.800252	5.27047	1.36073e-07	6.18258e-07	18.6061
545136	5.73173	4.21385	1.21325	3.47318	0.000514326	0.00134834	18.5564
223989	1181.12	4.21156	0.632276	6.66095	2.72064e-11	1.97948e-10	18.5271
18754	915.503	4.21048	0.497776	8.45859	2.70629e-17	3.5525e-16	18.5132
69974	18.1677	4.20814	0.91454	4.60137	4.19713e-06	1.54648e-05	18.4832
636791	5.7539	4.20644	1.23412	3.40846	0.000653308	0.00167985	18.4614
100504522	5.99615	4.20472	1.31187	3.20514	0.00134996	0.00326577	18.4394
320919	5.79308	4.2043	1.25793	3.34224	0.000831047	0.00209601	18.434
234912	70.8677	4.20208	0.562248	7.47371	7.79639e-14	7.37523e-13	18.4056
30947	98.0427	4.20116	0.761557	5.51655	3.45723e-08	1.7041e-07	18.394
14103	5.81641	4.20097	1.2597	3.33491	0.000853281	0.00214679	18.3915
12167	55.6317	4.20017	0.900314	4.66523	3.08278e-06	1.15753e-05	18.3813
320469	13.3975	4.19766	1.15722	3.62735	0.000286344	0.000784365	18.3494
18430	14.119	4.19584	0.924886	4.5366	5.71688e-06	2.05551e-05	18.3262
13340	277.534	4.19334	0.637295	6.5799	4.70775e-11	3.32757e-10	18.2945
83771	43.5998	4.19066	0.648212	6.46496	1.01328e-10	6.87117e-10	18.2606
22115	5.627	4.18792	1.21184	3.45585	0.000548566	0.00143122	18.226
433208	5.73595	4.17655	1.26823	3.29322	0.000990456	0.00246386	18.0829
69522	5.45612	4.17454	1.18221	3.53113	0.000413786	0.00110083	18.0577
100861803	55.7196	4.17275	0.703592	5.93063	3.01766e-09	1.71378e-08	18.0353
244757	10.2854	4.17151	1.1077	3.76592	0.00016594	0.000472843	18.0197
100504207	5.54038	4.1711	1.21181	3.44205	0.000577329	0.00150124	18.0147
22227	5.50388	4.16944	1.20349	3.46446	0.000531302	0.00138929	17.9939
69391	5.68209	4.16685	1.26013	3.30668	0.000944089	0.00235748	17.9617
380959	978.703	4.16447	0.57361	7.26012	3.86753e-13	3.41747e-12	17.9321
100503802	5.70603	4.16341	1.28114	3.24976	0.00115501	0.00283781	17.9189
55938	5.5049	4.16264	1.22256	3.40485	0.000662003	0.00170033	17.9093
723908	5.48623	4.16022	1.20632	3.44868	0.000563342	0.0014672	17.8793
13837	224.825	4.16013	0.890898	4.6696	3.01792e-06	1.13526e-05	17.8782
74492	5.76934	4.15974	1.30595	3.18522	0.00144646	0.00347304	17.8734
11614	5.49736	4.1594	1.21584	3.421	0.000623908	0.00160982	17.8692
230777	6.01145	4.15804	1.37545	3.02305	0.00250244	0.00573112	17.8523
80288	1102.11	4.15487	0.4505	9.22279	2.89455e-20	4.97303e-19	17.8132
319859	5.82094	4.15352	1.32858	3.1263	0.00177024	0.00417205	17.7965
52666	1252.9	4.15315	0.351537	11.8143	3.29417e-32	1.23577e-30	17.7919
100628571	5.97466	4.1531	1.3727	3.02549	0.0024823	0.00568873	17.7912
106722	5.47291	4.15182	1.22429	3.39121	0.000695841	0.00178137	17.7755
57810	578.396	4.15097	0.494046	8.40199	4.38991e-17	5.68499e-16	17.765
320825	259.51	4.15049	0.652754	6.35843	2.03828e-10	1.33139e-09	17.7591
80976	346.378	4.14682	0.373619	11.0991	1.26768e-28	3.86113e-27	17.714
100502918	9.08966	4.14451	1.02041	4.06161	4.8736e-05	0.000151862	17.6857
241525	166.946	4.13861	0.808879	5.11648	3.11293e-07	1.34234e-06	17.6135
15394	107.149	4.13824	0.84982	4.86955	1.11855e-06	4.4633e-06	17.6089
100042715	6.30413	4.13822	1.47149	2.81228	0.00491924	0.0105811	17.6088
11419	2541.88	4.13756	0.481472	8.59357	8.43048e-18	1.15776e-16	17.6007
433171	5.4595	4.13418	1.22843	3.36543	0.000764235	0.00193946	17.5595
78906	16.7119	4.13405	1.00865	4.0986	4.15652e-05	0.000131167	17.5579
230793	976.548	4.134	0.94022	4.39684	1.09837e-05	3.78288e-05	17.5573
319655	2806.87	4.13313	0.567584	7.28197	3.28968e-13	2.92902e-12	17.5467
15235	5.65607	4.13291	1.29792	3.18426	0.00145123	0.00348296	17.5441
213402	25.7872	4.13045	0.685214	6.02797	1.66029e-09	9.72975e-09	17.5142
271144	106.413	4.12913	0.694838	5.94258	2.80574e-09	1.59731e-08	17.4981
53321	224.894	4.12885	0.580282	7.11525	1.11713e-12	9.42814e-12	17.4948
381204	17.6161	4.12579	0.79369	5.19824	2.01187e-07	8.93945e-07	17.4577
56216	720.515	4.12354	0.589135	6.99931	2.5723e-12	2.0828e-11	17.4305
240725	1140.24	4.11969	1.03431	3.98304	6.80393e-05	0.000207273	17.384
100038605	84.2924	4.11937	0.906531	4.5441	5.51707e-06	1.98979e-05	17.3801
101604	78.5649	4.11723	0.817759	5.03478	4.78408e-07	2.00843e-06	17.3544
66323	41.4522	4.11638	0.638495	6.447	1.14086e-10	7.69165e-10	17.3441
16563	1672.73	4.11581	0.368952	11.1554	6.73829e-29	2.07165e-27	17.3374
13090	5.43257	4.11157	1.26834	3.2417	0.0011882	0.00290974	17.2864
23934	1571.97	4.11059	0.391833	10.4907	9.53593e-26	2.40323e-24	17.2747
60344	362.337	4.10909	0.961734	4.27258	1.93225e-05	6.41181e-05	17.2567
27404	105.536	4.10713	0.622986	6.59264	4.3207e-11	3.07125e-10	17.2333
216565	1547.51	4.10585	0.489556	8.38688	4.99229e-17	6.44975e-16	17.218
57746	5.24364	4.10559	1.19909	3.42393	0.000617223	0.00159395	17.215
66573	2108.76	4.10335	0.686042	5.9812	2.21502e-09	1.27628e-08	17.1882
70753	5.37335	4.10249	1.25712	3.26341	0.00110082	0.00271487	17.178
15482	104.778	4.10236	0.511315	8.02317	1.03054e-15	1.16165e-14	17.1765
353155	5.49516	4.10182	1.29928	3.157	0.00159399	0.00379439	17.1701
676246	5.28926	4.10089	1.22571	3.34572	0.000820678	0.00207305	17.1589
22634	353.598	4.10005	0.762343	5.37822	7.52247e-08	3.54065e-07	17.149
21909	6.17556	4.09429	1.49552	2.7377	0.00618708	0.0129872	17.0807
268480	310.77	4.08802	0.365151	11.1954	4.2935e-29	1.33761e-27	17.0066
396184	296.726	4.08312	0.558032	7.317	2.53581e-13	2.29021e-12	16.9489
59056	38.2168	4.08307	0.766339	5.32802	9.92909e-08	4.59667e-07	16.9483
319974	7251.55	4.07673	0.516695	7.89002	3.02127e-15	3.23826e-14	16.874
269695	1532.56	4.07475	0.52153	7.81308	5.5809e-15	5.83639e-14	16.8509
104383	1709.13	4.07444	0.957699	4.2544	2.09606e-05	6.9189e-05	16.8472
17762	17960.4	4.07443	0.476257	8.5551	1.17767e-17	1.59321e-16	16.8471
15185	2050.46	4.07228	0.437502	9.30802	1.30238e-20	2.30041e-19	16.822
449631	5.1522	4.06992	1.21801	3.34144	0.000833442	0.00210172	16.7945
97775	5.43502	4.06958	1.32262	3.0769	0.00209164	0.00486294	16.7905
226777	5.69716	4.06751	1.40309	2.89896	0.00374404	0.00825304	16.7665
18125	55.1636	4.06605	0.863294	4.70993	2.47799e-06	9.44852e-06	16.7496
328918	92.2575	4.06589	0.798679	5.09077	3.56606e-07	1.52249e-06	16.7477
100502586	12.4563	4.06538	0.937683	4.33555	1.45393e-05	4.93167e-05	16.7417
16526	209.584	4.06361	0.494196	8.22267	1.99018e-16	2.42198e-15	16.7212
320609	53.31	4.05943	0.864517	4.6956	2.65819e-06	1.00946e-05	16.6729
245650	5.30566	4.05793	1.28552	3.15666	0.00159589	0.00379784	16.6555
18044	1147.05	4.0568	0.623699	6.50441	7.79966e-11	5.35339e-10	16.6424
100499517	5.20129	4.05631	1.25851	3.2231	0.00126812	0.00308788	16.6368
107003	5.17656	4.05514	1.25603	3.22853	0.00124429	0.00303711	16.6234
20981	353.472	4.05453	0.493645	8.21345	2.14919e-16	2.60386e-15	16.6164
104831	1823	4.05204	0.583152	6.94852	3.69145e-12	2.94237e-11	16.5877
17954	653.733	4.04977	0.306825	13.199	8.89376e-40	5.27052e-38	16.5616
72388	8.83017	4.04973	1.02292	3.95899	7.52678e-05	0.000227472	16.5611
545481	5.20957	4.04962	1.27028	3.18797	0.00143273	0.00344412	16.5599
791377	9.24247	4.04639	1.08577	3.72675	0.000193964	0.000546696	16.5228
70717	8.60044	4.04593	1.07034	3.78005	0.000156798	0.000449298	16.5176
100217427	8.37825	4.0398	1.00778	4.00862	6.10739e-05	0.000187205	16.4476
277414	4668.19	4.03905	0.311832	12.9526	2.26982e-38	1.24165e-36	16.439
627110	1984.12	4.03557	0.320215	12.6027	2.04117e-36	1.00559e-34	16.3994
83383	98.0229	4.0327	0.432281	9.32889	1.06983e-20	1.8999e-19	16.3668
20167	1582.1	4.03222	0.380062	10.6094	2.69515e-26	7.01942e-25	16.3614
72628	195.738	4.03123	0.572293	7.04399	1.86812e-12	1.53234e-11	16.3501
78073	5.09365	4.02801	1.25666	3.20532	0.00134913	0.00326466	16.3137
241846	3204.74	4.02797	0.221825	18.1584	1.10227e-73	3.16292e-71	16.3133
16565	15790.5	4.02526	0.579662	6.94415	3.80736e-12	3.02444e-11	16.2826
66808	4.9975	4.02449	1.22601	3.28259	0.00102858	0.00254784	16.2739
21678	45.5765	4.02402	0.72104	5.58086	2.39335e-08	1.20522e-07	16.2686
210933	916.724	4.02311	0.511817	7.86045	3.82771e-15	4.07326e-14	16.2584
100504641	8.4262	4.02236	1.06366	3.78163	0.000155803	0.00044668	16.2499
100628602	5.0121	4.02182	1.23487	3.25687	0.00112649	0.00277316	16.2438
627214	98.503	4.02134	0.59746	6.73073	1.68812e-11	1.25676e-10	16.2384
56543	1023.67	4.02033	0.811393	4.95485	7.23871e-07	2.98227e-06	16.2271
27208	8.88698	4.02014	1.06651	3.76944	0.000163617	0.000466956	16.225
11906	6238.84	4.01754	0.651889	6.16293	7.14125e-10	4.36644e-09	16.1957
280621	5.14179	4.01312	1.29722	3.09363	0.00197722	0.00461597	16.1462
99031	1521.18	4.01215	0.687676	5.83436	5.39986e-09	2.96277e-08	16.1353
74134	17.1198	4.01041	1.111	3.60973	0.000306515	0.000834171	16.1159
100503873	49.4088	4.01008	0.639862	6.2671	3.67834e-10	2.3328e-09	16.1122
12299	5.02546	4.0083	1.26314	3.17328	0.00150726	0.00360367	16.0924
22419	27.1491	4.00561	0.722576	5.54351	2.96466e-08	1.47971e-07	16.0623
331045	43.2557	4.00523	0.73507	5.44878	5.07175e-08	2.4434e-07	16.0581
214791	209.698	4.00475	0.435631	9.19299	3.82058e-20	6.49579e-19	16.0528
27409	4.99284	4	1.26867	3.1529	0.00161657	0.00384424	16
17756	16393.2	3.99931	0.525494	7.61056	2.72908e-14	2.68735e-13	15.9923
18948	5.10342	3.99902	1.30504	3.06429	0.00218188	0.00504907	15.9891
70127	223.381	3.99831	0.660273	6.05555	1.39942e-09	8.28107e-09	15.9813
216227	5.01041	3.99819	1.26008	3.17296	0.00150892	0.00360712	15.9799
353237	150.733	3.99752	0.776216	5.15001	2.6047e-07	1.13788e-06	15.9725
16370	5.10311	3.99422	1.3085	3.05251	0.00226937	0.00523525	15.936
269700	7274.88	3.99365	0.365597	10.9236	8.88547e-28	2.5231e-26	15.9298
70291	8.08442	3.99164	1.01625	3.9278	8.57251e-05	0.000256893	15.9075
171281	4.97115	3.99147	1.26094	3.16548	0.00154829	0.00369422	15.9057
72002	12.3047	3.99048	0.95346	4.18526	2.84841e-05	9.20725e-05	15.8947
50817	398.857	3.9869	0.596517	6.68363	2.33093e-11	1.70428e-10	15.8554
625801	4.8893	3.98461	1.23875	3.21664	0.00129699	0.00315163	15.8302
100504347	4.96292	3.98406	1.27011	3.13678	0.00170817	0.00404558	15.8242
64296	1318.42	3.98314	0.471728	8.44372	3.07407e-17	4.02559e-16	15.8141
16539	4.99973	3.982	1.28882	3.08965	0.00200391	0.00467493	15.8016
57249	5.04897	3.98032	1.30393	3.05256	0.00226901	0.00523525	15.7832
94187	1860.61	3.97756	0.413468	9.62001	6.58232e-22	1.26214e-20	15.7531
100038587	5.09251	3.97707	1.32832	2.99406	0.00275293	0.00626069	15.7478
12295	1349.94	3.97565	0.369996	10.7451	6.24775e-27	1.68627e-25	15.7323
100316669	4.87419	3.97537	1.24259	3.19926	0.00137782	0.00332433	15.7292
329324	128.36	3.97399	0.992478	4.0041	6.22528e-05	0.000190568	15.7141
213272	4.72292	3.97297	1.18641	3.34873	0.000811823	0.00205227	15.703
12323	1151.31	3.97189	0.474954	8.36268	6.13101e-17	7.82206e-16	15.6913
208748	381.698	3.97093	0.847667	4.68454	2.80591e-06	1.06014e-05	15.6808
100862386	4.95363	3.9698	1.27928	3.10315	0.0019147	0.00447959	15.6686
71729	1620.28	3.96734	0.190847	20.788	5.55746e-96	2.84056e-93	15.6418
71722	3830.78	3.96257	0.33222	11.9275	8.50444e-33	3.25758e-31	15.5902
66715	8.08706	3.96055	1.06545	3.71725	0.000201404	0.000566202	15.5684
21848	1814.2	3.96019	0.322203	12.291	1.01268e-34	4.51319e-33	15.5645
23805	16914.2	3.95951	0.467554	8.46856	2.48455e-17	3.27192e-16	15.5572
21983	139.331	3.95607	0.778066	5.08449	3.68611e-07	1.56964e-06	15.5201
20361	626.615	3.9503	0.361806	10.9183	9.42729e-28	2.66769e-26	15.4581
69739	4.71559	3.94657	1.23067	3.20685	0.00134195	0.00324882	15.4183
243312	223.133	3.94301	0.570346	6.91337	4.73263e-12	3.72328e-11	15.3803
100042959	74.9403	3.94292	0.42591	9.25764	2.09007e-20	3.64837e-19	15.3794
353328	15.0466	3.94181	0.894731	4.40559	1.05498e-05	3.64341e-05	15.3675
76132	4218.06	3.9412	0.55358	7.11948	1.08335e-12	9.14776e-12	15.361
242620	4.65815	3.94048	1.20689	3.265	0.00109466	0.0027013	15.3533
78933	11.3683	3.93967	0.927159	4.24918	2.14552e-05	7.06648e-05	15.3447
76652	5.03064	3.93703	1.3634	2.88767	0.00388108	0.00853212	15.3167
93701	97.712	3.93667	0.917789	4.2893	1.7924e-05	5.96955e-05	15.3128
66662	46.5637	3.93423	0.675265	5.8262	5.67044e-09	3.09979e-08	15.287
791352	4.87212	3.92844	1.31179	2.99472	0.00274697	0.00624974	15.2258
56306	179.908	3.92842	0.491173	7.99803	1.26428e-15	1.40501e-14	15.2255
11686	4.59708	3.92813	1.20519	3.25934	0.00111673	0.00275038	15.2224
73649	15.2665	3.92755	0.785023	5.0031	5.64168e-07	2.34797e-06	15.2163
72122	4.7064	3.92709	1.26102	3.11422	0.00184433	0.00433106	15.2115
20664	48.8875	3.92654	0.775565	5.06282	4.13107e-07	1.74684e-06	15.2057
100502933	16.6335	3.92496	0.887797	4.42101	9.82426e-06	3.41086e-05	15.189
431706	4.75278	3.92355	1.27311	3.08185	0.00205715	0.00479026	15.1743
73815	4.63822	3.92098	1.23006	3.18764	0.00143438	0.00344757	15.1472
72413	50.113	3.92074	0.73302	5.34876	8.85607e-08	4.12913e-07	15.1447
14218	729.801	3.91863	0.423844	9.24545	2.34254e-20	4.06736e-19	15.1226
100504106	4.66197	3.91679	1.24517	3.14558	0.00165758	0.00393431	15.1032
71790	4.69224	3.91667	1.25149	3.1296	0.00175046	0.00413317	15.102
317677	4.59142	3.91469	1.22362	3.19926	0.00137779	0.00332433	15.0813
751518	7.90946	3.91141	1.08919	3.5911	0.000329283	0.000890943	15.047
110862	100.298	3.91008	0.903259	4.32885	1.49887e-05	5.07463e-05	15.0332
791281	4.64486	3.90867	1.25697	3.1096	0.00187338	0.0043911	15.0185
109637	12.2479	3.90593	0.967029	4.03911	5.3655e-05	0.000165894	14.9901
100129	739.794	3.90584	0.376816	10.3654	3.56381e-25	8.46005e-24	14.989
381693	4.59609	3.90313	1.24784	3.12791	0.00176057	0.0041522	14.961
382421	4.68427	3.90289	1.27458	3.0621	0.00219793	0.00508333	14.9585
57349	7.57192	3.90268	1.80976	2.15647	0.0310471	0.0549099	14.9563
241489	4.88391	3.90208	1.35565	2.87839	0.00399714	0.00876252	14.9501
77341	4.60013	3.9008	1.24697	3.12822	0.00175871	0.00414922	14.9368
333715	4.66666	3.90029	1.28159	3.04331	0.00233987	0.00538572	14.9316
21331	4.60106	3.89907	1.24504	3.13168	0.00173811	0.00410698	14.9189
16147	4.49173	3.89806	1.19933	3.2502	0.00115326	0.00283483	14.9085
242594	7.58601	3.89725	1.01486	3.84018	0.000122943	0.000357612	14.9001
320952	4.77858	3.89536	1.32287	2.94463	0.00323343	0.00723475	14.8806
19817	326.959	3.89404	0.626413	6.21641	5.08665e-10	3.17668e-09	14.867
14165	8.83333	3.88883	1.18295	3.28741	0.00101114	0.00250884	14.8134
723857	4.7319	3.8881	1.31736	2.95144	0.00316297	0.00709261	14.8058
50766	1183.5	3.88785	0.58105	6.69108	2.21532e-11	1.62192e-10	14.8034
654472	4.5389	3.88696	1.2464	3.11854	0.00181747	0.00427414	14.7942
100038353	4.47322	3.8847	1.21333	3.20168	0.00136629	0.00330139	14.771
16506	60.7076	3.88456	0.706025	5.50201	3.75482e-08	1.8415e-07	14.7696
319352	405.042	3.88412	0.415828	9.34068	9.57155e-21	1.71283e-19	14.7651
408191	5.04015	3.88408	1.43534	2.70604	0.00680911	0.014171	14.7647
76615	4.68836	3.88337	1.30487	2.97606	0.00291976	0.00659973	14.7575
54126	3272.65	3.88207	0.613593	6.32679	2.50317e-10	1.62018e-09	14.7442
70036	55.5642	3.88058	0.67266	5.769	7.97411e-09	4.25529e-08	14.7289
319909	8.07317	3.88026	1.0689	3.63016	0.000283246	0.00077653	14.7257
11601	7.53301	3.87874	1.03602	3.7439	0.000181187	0.000513071	14.7101
22129	15924	3.87821	0.392382	9.88376	4.89619e-23	1.02015e-21	14.7047
620631	4.41832	3.87794	1.1959	3.2427	0.00118405	0.00290132	14.702
623131	4.50241	3.87138	1.24439	3.11107	0.00186409	0.00437246	14.6353
69601	2557.18	3.87123	0.214875	18.0162	1.45482e-72	3.90083e-70	14.6338
14799	1382.17	3.87068	0.483956	7.99801	1.26447e-15	1.40501e-14	14.6282
245827	11.5328	3.87045	1.13638	3.40595	0.000659348	0.00169378	14.6259
58234	653.924	3.86994	0.87481	4.42374	9.70059e-06	3.37294e-05	14.6207
77940	56.8372	3.86915	0.713749	5.42088	5.93075e-08	2.83103e-07	14.6126
319727	17.637	3.8689	0.767934	5.03807	4.70259e-07	1.97574e-06	14.6102
77220	335.782	3.86729	0.747198	5.17572	2.27039e-07	9.99853e-07	14.5938
100503387	4.4584	3.86721	1.22765	3.15008	0.00163226	0.0038776	14.593
320626	4.45862	3.86393	1.23305	3.13362	0.00172662	0.00408397	14.5599
328977	2603.24	3.86343	0.616329	6.26845	3.64652e-10	2.31532e-09	14.5548
330695	1899.9	3.86141	0.365298	10.5706	4.08021e-26	1.05096e-24	14.5345
353130	4.52256	3.86052	1.26913	3.04187	0.00235112	0.00540857	14.5256
78365	625.251	3.85972	0.96906	3.98295	6.80648e-05	0.000207312	14.5175
75410	2923.74	3.8582	0.424388	9.0912	9.7955e-20	1.61345e-18	14.5022
70852	10.6385	3.8579	0.894181	4.31445	1.60003e-05	5.37704e-05	14.4991
216166	4.40587	3.85737	1.21592	3.1724	0.00151185	0.00361359	14.4939
15204	4972.18	3.85696	0.704981	5.47101	4.47471e-08	2.1724e-07	14.4897
16512	4.56484	3.85498	1.30188	2.96109	0.00306556	0.00689899	14.4698
100042784	30.6995	3.85429	0.791546	4.86932	1.11984e-06	4.46732e-06	14.4629
269713	5136.4	3.85419	0.367087	10.4994	8.69448e-26	2.19794e-24	14.4619
22701	1841.95	3.85416	0.562446	6.85249	7.25737e-12	5.57284e-11	14.4616
14362	210.231	3.85415	0.566743	6.80053	1.04238e-11	7.88581e-11	14.4616
100504178	4.4207	3.85236	1.23704	3.11417	0.00184465	0.0043312	14.4436
238377	24.3496	3.8523	0.680789	5.65858	1.52629e-08	7.89253e-08	14.443
22697	1280.88	3.8516	0.519158	7.41893	1.18069e-13	1.09413e-12	14.436
333193	129.836	3.85062	0.731275	5.26563	1.39713e-07	6.33707e-07	14.4262
12123	164.935	3.84989	1.08507	3.54804	0.000388103	0.00103655	14.4189
218693	1372.68	3.84904	0.167696	22.9525	1.39091e-116	1.19735e-113	14.4104
170441	14.3885	3.84877	0.839849	4.58269	4.59026e-06	1.68073e-05	14.4077
66766	4.45184	3.84826	1.25567	3.06471	0.00217882	0.00504341	14.4026
320272	4.45779	3.84567	1.26728	3.03459	0.00240862	0.00553461	14.3768
100217443	17.3489	3.84542	0.753412	5.104	3.3254e-07	1.42719e-06	14.3743
378937	226.216	3.84528	0.284765	13.5034	1.49364e-41	9.89068e-40	14.3729
16782	10.6783	3.84495	1.1681	3.29163	0.000996084	0.00247598	14.3696
241201	249.733	3.84463	0.481633	7.9825	1.43399e-15	1.58369e-14	14.3664
225055	2498.9	3.84413	0.588871	6.52797	6.66653e-11	4.60852e-10	14.3615
16524	43.8644	3.84299	0.65619	5.85652	4.72657e-09	2.61794e-08	14.3501
433745	7.61893	3.84292	1.02908	3.73434	0.000188205	0.000531471	14.3494
76872	47.1265	3.84165	0.64454	5.9603	2.51769e-09	1.43783e-08	14.3368
240054	51.4491	3.83878	0.484224	7.92768	2.23275e-15	2.41527e-14	14.3083
320864	23.8731	3.83596	0.764115	5.02013	5.16364e-07	2.15939e-06	14.2803
73728	1987.45	3.83426	0.189039	20.2829	1.81997e-91	8.04527e-89	14.2635
12325	1612.41	3.83384	0.222645	17.2195	1.89643e-66	3.48518e-64	14.2594
381582	118.343	3.8334	0.67108	5.71229	1.11467e-08	5.86033e-08	14.2551
18551	20.466	3.83053	0.7866	4.86973	1.11751e-06	4.46131e-06	14.2267
216795	4.64679	3.83052	1.3589	2.81885	0.00481966	0.0103957	14.2266
100039957	4.2512	3.82965	1.19277	3.21072	0.00132401	0.00320966	14.218
381884	4.33102	3.82901	1.22416	3.12787	0.0017608	0.0041522	14.2117
100270744	4.53111	3.82573	1.33035	2.87573	0.00403089	0.00882823	14.1794
70640	785.348	3.82151	0.36566	10.451	1.44967e-25	3.59255e-24	14.1381
100042054	4.39536	3.8206	1.2757	2.9949	0.00274536	0.00624696	14.1291
18781	4.22029	3.81706	1.19098	3.20497	0.00135076	0.00326724	14.0945
77097	2413.55	3.81694	0.407966	9.35602	8.2795e-21	1.48976e-19	14.0933
353310	1538.18	3.8161	0.621828	6.13691	8.41436e-10	5.09158e-09	14.0851
71566	949.145	3.81469	0.40022	9.53148	1.55055e-21	2.92174e-20	14.0713
320633	264.138	3.81359	0.425321	8.96639	3.06402e-19	4.85611e-18	14.0606
80733	89.0911	3.81294	0.702742	5.4258	5.76944e-08	2.7576e-07	14.0543
279610	4.42529	3.8109	1.29693	2.93839	0.00329919	0.00735873	14.0344
20977	2097.64	3.80926	0.272515	13.9782	2.11799e-44	1.64961e-42	14.0185
16450	852.242	3.80894	0.257663	14.7826	1.89608e-49	1.92623e-47	14.0154
74184	4.24997	3.80816	1.21782	3.12703	0.00176582	0.00416285	14.0078
64580	43.3217	3.80661	0.615702	6.18256	6.30717e-10	3.88404e-09	13.9928
666680	4.21846	3.80334	1.21301	3.13546	0.00171587	0.00406148	13.9611
279561	1163.34	3.80257	0.689308	5.51651	3.45801e-08	1.7041e-07	13.9537
723925	4.34075	3.80206	1.2769	2.97757	0.00290548	0.00656926	13.9487
225724	563.617	3.79931	0.434373	8.74664	2.19794e-18	3.20977e-17	13.9221
77300	1111.58	3.79639	0.614677	6.17624	6.56477e-10	4.03053e-09	13.894
73442	4193.02	3.79572	0.475135	7.98871	1.36363e-15	1.51211e-14	13.8875
279653	1088.79	3.79521	1.00148	3.78961	0.000150883	0.000433562	13.8827
12667	269.364	3.79507	0.285764	13.2804	3.00685e-40	1.83508e-38	13.8813
75693	44.7189	3.79316	0.737654	5.14219	2.7155e-07	1.18282e-06	13.8629
216831	217.011	3.79293	0.607012	6.24852	4.14354e-10	2.61062e-09	13.8607
232023	2622.52	3.79192	0.515827	7.35114	1.96523e-13	1.78872e-12	13.851
100504402	19.7234	3.79184	0.835711	4.53726	5.69902e-06	2.05045e-05	13.8502
70598	51.8283	3.78884	0.703402	5.38644	7.18656e-08	3.3923e-07	13.8214
100503562	4.34597	3.78749	1.29123	2.93325	0.00335437	0.00746653	13.8085
212123	1624	3.7847	0.634155	5.9681	2.40026e-09	1.37446e-08	13.7819
269275	4.47656	3.78327	1.36688	2.76782	0.00564328	0.0119577	13.7682
225362	1574.28	3.78136	0.299908	12.6084	1.89831e-36	9.40873e-35	13.75
328186	94.578	3.77968	0.83025	4.55246	5.30223e-06	1.91951e-05	13.734
71768	7.3276	3.77843	1.04238	3.62481	0.000289175	0.000791349	13.7221
242838	4.26901	3.77738	1.29086	2.92625	0.00343077	0.00762206	13.7121
72154	812.795	3.77673	0.45468	8.30634	9.86985e-17	1.23987e-15	13.7059
109332	4.30565	3.77549	1.29787	2.90898	0.0036261	0.00801249	13.6942
67287	3172.29	3.77418	0.662505	5.69683	1.22059e-08	6.38186e-08	13.6817
100041781	4.22088	3.77198	1.2699	2.9703	0.00297512	0.00671352	13.6609
100040792	4.11749	3.76945	1.21882	3.0927	0.00198345	0.00462919	13.637
15484	223.01	3.76844	0.763326	4.93687	7.93853e-07	3.2485e-06	13.6274
104885	376.527	3.768	0.504484	7.46902	8.07936e-14	7.61648e-13	13.6232
80749	849.373	3.76476	0.526964	7.14423	9.04986e-13	7.73351e-12	13.5927
791370	4.1932	3.76437	1.25827	2.9917	0.00277426	0.0063057	13.5891
100504628	4.17788	3.76225	1.24729	3.01634	0.0025585	0.00585024	13.569
100041151	7.41615	3.76212	1.1889	3.16436	0.00155423	0.00370677	13.5678
387181	4.22682	3.76171	1.28766	2.92136	0.00348504	0.00773005	13.564
240665	535.035	3.7613	0.400766	9.38526	6.27633e-21	1.13809e-19	13.5601
23797	2639.37	3.75909	0.432952	8.68247	3.87264e-18	5.52232e-17	13.5394
19775	5621.95	3.75902	0.445503	8.4377	3.23634e-17	4.23469e-16	13.5387
17199	4.23055	3.75891	1.28224	2.93152	0.00337303	0.00750398	13.5377
100072	2544.8	3.75613	0.293667	12.7905	1.8539e-37	9.68144e-36	13.5116
54169	1125.43	3.75521	0.494101	7.60007	2.95963e-14	2.90388e-13	13.503
239652	163.803	3.75414	0.803213	4.6739	2.9553e-06	1.11401e-05	13.493
100503358	4.17466	3.75243	1.27506	2.94294	0.00325109	0.00726595	13.4771
67983	6.97888	3.75153	1.08038	3.47241	0.000515817	0.0013516	13.4686
328516	4.12526	3.75038	1.25869	2.97958	0.00288643	0.0065307	13.4579
16521	4.03504	3.74852	1.20969	3.09874	0.00194348	0.00454237	13.4406
229011	1998.88	3.74831	0.575056	6.51816	7.11764e-11	4.91e-10	13.4386
100504266	7.08451	3.74717	1.11472	3.36154	0.000775096	0.0019655	13.428
246155	4.76309	3.74409	1.51349	2.47382	0.0133677	0.0259208	13.3994
66011	151.097	3.74387	0.611239	6.12505	9.06552e-10	5.46537e-09	13.3973
11806	13.2692	3.74316	1.04025	3.59834	0.00032026	0.000868396	13.3907
12021	34.3922	3.74291	0.76713	4.8791	1.06568e-06	4.27214e-06	13.3884
20856	6.96452	3.74265	1.08403	3.45252	0.000555369	0.00144736	13.3859
56014	4.16874	3.74227	1.28271	2.91746	0.00352893	0.00781361	13.3825
217340	3032.84	3.73705	0.345247	10.8243	2.64144e-27	7.31022e-26	13.3341
108030	1246.22	3.73594	0.528234	7.0725	1.52163e-12	1.26142e-11	13.3238
16189	3.98595	3.73541	1.20102	3.1102	0.0018696	0.00438349	13.319
328440	10.6604	3.73517	0.941978	3.96525	7.33197e-05	0.000222077	13.3168
11500	4.08346	3.73342	1.26083	2.96108	0.00306566	0.00689899	13.3006
100217430	4.09005	3.73335	1.24922	2.98854	0.00280314	0.00636073	13.3
100502630	25.26	3.7332	0.754414	4.94848	7.47966e-07	3.0769e-06	13.2986
100041958	4.18785	3.72709	1.31913	2.82541	0.00472207	0.0102013	13.2423
18378	6.88457	3.72672	1.08368	3.43895	0.000583978	0.0015166	13.239
229722	83.6114	3.72189	0.6912	5.38469	7.25711e-08	3.42264e-07	13.1948
208076	1232.49	3.71854	0.631547	5.888	3.90907e-09	2.18587e-08	13.1642
93714	118.019	3.71708	0.884742	4.20132	2.65368e-05	8.61355e-05	13.1508
15194	1713.33	3.71634	0.52981	7.01447	2.30822e-12	1.87827e-11	13.144
100504626	22.9314	3.71551	0.664536	5.59113	2.25597e-08	1.14308e-07	13.1365
14264	7.41383	3.71508	1.12028	3.31619	0.000912522	0.00228529	13.1326
110962	1687.23	3.71334	0.458139	8.10527	5.26303e-16	6.13995e-15	13.1168
75656	3.99111	3.70972	1.23643	3.00035	0.00269666	0.00614468	13.0839
14803	307.558	3.70837	0.405552	9.14399	6.01896e-20	1.00455e-18	13.0716
105975	3.99767	3.70693	1.26002	2.94195	0.00326156	0.00728719	13.0586
110084	188.494	3.70661	0.307188	12.0662	1.59231e-33	6.43058e-32	13.0557
14809	3533.12	3.7065	0.383889	9.65512	4.6763e-22	9.04084e-21	13.0547
20274	314.646	3.70612	1.14339	3.24134	0.00118967	0.00291291	13.0513
320007	9.98919	3.70461	0.943728	3.9255	8.6548e-05	0.000259074	13.0376
67856	3.90208	3.70057	1.21266	3.05161	0.00227619	0.00524949	13.0012
100124439	4.12418	3.69981	1.32416	2.79409	0.00520464	0.0111234	12.9943
78249	9.62851	3.69927	0.937531	3.94576	7.95486e-05	0.00023948	12.9895
72097	14.166	3.69831	1.05948	3.49067	0.000481819	0.00126923	12.9808
18008	1629.98	3.69475	0.462427	7.98993	1.35017e-15	1.4982e-14	12.9489
100042143	4.14134	3.6913	1.33905	2.75666	0.00583959	0.0123465	12.9179
80877	646.64	3.6906	0.540917	6.82285	8.92499e-12	6.78979e-11	12.9116
235048	78.2901	3.69027	0.870578	4.23888	2.24639e-05	7.3719e-05	12.9087
224833	3.88371	3.6874	1.22651	3.00642	0.0026434	0.00603004	12.883
100504521	3.9021	3.68657	1.23611	2.9824	0.00285999	0.00647895	12.8756
100861927	6.61808	3.68335	1.06228	3.46741	0.000525504	0.00137566	12.8469
12288	596.116	3.6824	0.725203	5.07775	3.81923e-07	1.62169e-06	12.8385
73720	6.59562	3.68229	1.06242	3.46596	0.000528342	0.00138221	12.8375
17888	21.3806	3.68203	0.846427	4.35008	1.36085e-05	4.63614e-05	12.8352
94214	4391.94	3.67846	0.646031	5.69393	1.24151e-08	6.48344e-08	12.8034
100217438	9.68787	3.67683	1.03998	3.53548	0.000407041	0.00108412	12.789
18015	1905.42	3.67512	0.493851	7.44176	9.93529e-14	9.27521e-13	12.7738
213053	266.875	3.67497	0.429842	8.54959	1.23526e-17	1.66837e-16	12.7725
434008	636.606	3.67423	0.68699	5.3483	8.87832e-08	4.13832e-07	12.766
67317	3.97815	3.67362	1.3074	2.80986	0.00495629	0.010651	12.7605
100019	1675.26	3.67313	0.573765	6.4018	1.53556e-10	1.01683e-09	12.7562
328235	4.3017	3.67235	1.44148	2.54762	0.0108461	0.0214873	12.7493
234683	21.8418	3.6723	0.724724	5.06717	4.03782e-07	1.71012e-06	12.7489
30841	1529.96	3.67166	0.479332	7.65996	1.85996e-14	1.85158e-13	12.7432
238076	6.7117	3.67137	1.02692	3.57511	0.000350078	0.000942066	12.7407
269120	34.1399	3.6713	0.694266	5.28803	1.23638e-07	5.64866e-07	12.7401
71086	4.00107	3.66919	1.32293	2.77354	0.00554507	0.0117725	12.7214
214812	2231.25	3.66675	0.311098	11.7865	4.58292e-32	1.70748e-30	12.7
100502854	81.564	3.6657	0.679136	5.3976	6.75372e-08	3.20185e-07	12.6907
83669	11133.2	3.66462	0.364285	10.0598	8.32023e-24	1.81448e-22	12.6812
16528	3.95681	3.66317	1.31321	2.78948	0.00527924	0.0112695	12.6684
11642	3.81639	3.66269	1.22781	2.9831	0.00285341	0.00646673	12.6642
12824	713.847	3.66189	0.669716	5.46782	4.55594e-08	2.20726e-07	12.6572
269774	2285.24	3.66154	0.736984	4.96827	6.75513e-07	2.78866e-06	12.6541
74488	4.17111	3.65892	1.40534	2.60359	0.00922526	0.0185823	12.6312
193022	7.27104	3.65861	1.3038	2.80611	0.00501433	0.0107616	12.6285
114886	385.507	3.65682	0.57788	6.328	2.48362e-10	1.60816e-09	12.6129
71106	6.58131	3.65648	1.09041	3.35329	0.000798556	0.00202217	12.6098
100504043	6.58663	3.65499	1.09974	3.32349	0.000888972	0.00222972	12.5968
18208	2564.21	3.65476	0.692551	5.27724	1.31144e-07	5.96825e-07	12.5948
232889	18.1725	3.65035	0.71993	5.07043	3.96928e-07	1.68321e-06	12.5564
408028	3.87796	3.64784	1.29276	2.82176	0.00477615	0.01031	12.5346
227357	3.75406	3.64608	1.21765	2.99437	0.00275016	0.00625613	12.5193
14237	3.85052	3.64577	1.26959	2.87162	0.00408367	0.00893228	12.5166
234159	3.81147	3.64547	1.25368	2.90781	0.00363975	0.00803831	12.514
237775	185.163	3.64151	0.892415	4.08051	4.49372e-05	0.000140982	12.4797
100503752	3.76038	3.64029	1.22985	2.95994	0.00307696	0.00692062	12.4691
74499	3.83651	3.64023	1.27272	2.86019	0.00423387	0.00923692	12.4686
69320	9.78249	3.63971	0.984805	3.69586	0.000219139	0.000612482	12.4641
72290	756.146	3.63936	0.489534	7.43435	1.05083e-13	9.80347e-13	12.4611
100038388	3.93463	3.63906	1.31844	2.76012	0.00577793	0.0122288	12.4585
226278	3.95664	3.63861	1.33884	2.71773	0.00657315	0.0137341	12.4546
100503099	3.81631	3.63636	1.27679	2.84806	0.00439865	0.00956707	12.4353
100038391	3.87722	3.63571	1.30433	2.78741	0.00531315	0.0113345	12.4296
118453	4.23414	3.63483	1.4639	2.48298	0.0130287	0.0253658	12.4221
110532	364.659	3.633	0.855155	4.24835	2.15346e-05	7.08836e-05	12.4063
667947	3.8138	3.63145	1.28301	2.83041	0.00464877	0.0100562	12.393
29813	868.953	3.63113	0.554342	6.55035	5.74013e-11	4.00194e-10	12.3903
245440	3.88555	3.62974	1.30532	2.78074	0.00542356	0.0115385	12.3783
70575	1181.88	3.62902	0.603912	6.00919	1.86458e-09	1.08453e-08	12.3721
230721	470.49	3.62852	0.408171	8.8897	6.12719e-19	9.45438e-18	12.3678
50786	237.461	3.62821	0.844656	4.29549	1.7431e-05	5.82113e-05	12.3651
100302601	3.82999	3.62453	1.30015	2.78779	0.00530697	0.0113228	12.3337
73435	3.78447	3.62293	1.26058	2.87402	0.00405284	0.00887013	12.32
330149	126.647	3.62227	0.672444	5.38673	7.17522e-08	3.38891e-07	12.3144
76500	1452.26	3.62171	0.393212	9.21059	3.24323e-20	5.53718e-19	12.3096
78263	3.75175	3.61852	1.26885	2.8518	0.00434718	0.00946897	12.2824
246049	3.86467	3.61775	1.32591	2.72851	0.00636211	0.0133169	12.2758
11538	4224.37	3.61647	0.720866	5.01684	5.25283e-07	2.19508e-06	12.2649
320506	308.783	3.61571	0.724671	4.98945	6.05507e-07	2.51362e-06	12.2585
330544	448.201	3.61354	0.5788	6.24316	4.28822e-10	2.69866e-09	12.24
15135	403.496	3.61251	1.34147	2.69294	0.00708241	0.01468	12.2313
16885	2242.89	3.61227	0.543733	6.64346	3.06408e-11	2.21459e-10	12.2293
271944	3.83548	3.61102	1.31186	2.75259	0.00591255	0.0124862	12.2187
71093	9.46191	3.61023	0.957328	3.77116	0.000162493	0.00046407	12.2121
27494	408.079	3.60955	0.433229	8.33173	7.96664e-17	1.0062e-15	12.2062
240069	3.77215	3.60936	1.27788	2.8245	0.00473545	0.0102289	12.2047
11889	3.77056	3.60847	1.29251	2.79184	0.00524092	0.0111951	12.1971
75273	962.861	3.60612	0.518574	6.95392	3.55262e-12	2.83723e-11	12.1773
319688	3.76878	3.60573	1.29634	2.78147	0.0054114	0.0115171	12.174
328274	9.03341	3.60442	0.968364	3.72218	0.000197513	0.000555741	12.1629
100043057	3.84133	3.60357	1.32011	2.72975	0.00633826	0.0132721	12.1557
14686	3.66562	3.60325	1.23781	2.91098	0.00360298	0.00796571	12.1531
192120	9.46141	3.60058	1.20252	2.99418	0.0027518	0.00625899	12.1306
268721	3918.19	3.6005	0.486038	7.40787	1.28346e-13	1.18667e-12	12.13
18108	414.789	3.59941	0.500949	7.18519	6.71146e-13	5.80808e-12	12.1208
13115	6.36114	3.59899	1.1183	3.21828	0.00128961	0.00313556	12.1173
244550	3.71392	3.59767	1.27655	2.81828	0.00482816	0.0104113	12.1062
100503622	3.91305	3.59762	1.38409	2.59927	0.00934225	0.0187902	12.1057
26949	1645.59	3.59664	0.372856	9.6462	5.10117e-22	9.85062e-21	12.0976
320671	3.60521	3.59439	1.21345	2.96214	0.00305509	0.00687899	12.0787
69678	3.85197	3.59417	1.35464	2.65323	0.00797256	0.0163285	12.0768
52028	624.361	3.59389	0.291851	12.3141	7.60146e-35	3.40629e-33	12.0745
77265	3.75556	3.59252	1.30361	2.75581	0.00585463	0.0123751	12.063
434858	6.43426	3.59236	1.04358	3.44234	0.000576709	0.0015001	12.0617
14723	31.0506	3.59162	0.745342	4.81875	1.44459e-06	5.66747e-06	12.0555
226041	26.2568	3.59007	0.759253	4.72842	2.26272e-06	8.66926e-06	12.0425
26568	410.825	3.5899	0.479629	7.48474	7.16879e-14	6.8091e-13	12.0411
230796	1275.71	3.58948	0.319942	11.2192	3.28307e-29	1.02673e-27	12.0377
15116	6.50841	3.58761	1.06164	3.37931	0.000726682	0.0018525	12.022
226352	444.468	3.5876	0.47592	7.53824	4.76346e-14	4.6074e-13	12.0219
22354	12.7419	3.58615	0.915349	3.91779	8.93644e-05	0.00026687	12.0098
54426	6.17641	3.58489	1.07394	3.33808	0.00084358	0.00212434	11.9994
13424	20723.1	3.5768	0.308351	11.5998	4.13245e-31	1.44733e-29	11.9323
100503351	3.82828	3.57666	1.35601	2.63764	0.00834863	0.0169944	11.9311
30791	160.4	3.57522	0.400185	8.93392	4.11189e-19	6.4235e-18	11.9192
207212	400.678	3.57181	0.398233	8.96916	2.98774e-19	4.74441e-18	11.8911
100169874	14.3295	3.57003	0.847588	4.21199	2.53133e-05	8.24092e-05	11.8765
18787	11.7497	3.56853	1.00782	3.54085	0.000398848	0.00106403	11.8641
791423	6.14064	3.56813	1.09209	3.26726	0.00108593	0.00268299	11.8608
100038467	3.57846	3.56778	1.23347	2.89247	0.00382228	0.00841302	11.858
11876	6.32911	3.56775	1.04995	3.39803	0.000678725	0.00174055	11.8577
70957	3.73233	3.56673	1.33744	2.66683	0.00765712	0.0157594	11.8493
239546	388.981	3.56577	0.357744	9.96738	2.11734e-23	4.4801e-22	11.8414
229542	606.14	3.56534	0.607161	5.87215	4.30167e-09	2.38907e-08	11.8379
106522	151.656	3.56524	0.738293	4.82903	1.37199e-06	5.40728e-06	11.8371
228869	1912.42	3.56477	0.495837	7.1894	6.50773e-13	5.6497e-12	11.8332
244886	136.339	3.56247	0.78581	4.5335	5.80131e-06	2.08312e-05	11.8144
77652	201.928	3.56132	0.377745	9.42782	4.18683e-21	7.68573e-20	11.8049
723885	3.66069	3.56099	1.29427	2.75136	0.00593481	0.0125316	11.8023
73616	3.60059	3.56059	1.25773	2.83096	0.00464078	0.0100416	11.799
381801	619.004	3.56034	0.384551	9.25843	2.07453e-20	3.62511e-19	11.7969
433319	3.6782	3.56007	1.31762	2.70189	0.00689468	0.0143318	11.7947
76022	1257.37	3.55786	0.486405	7.3146	2.58142e-13	2.32626e-12	11.7766
19726	758.068	3.55733	0.587427	6.05578	1.39735e-09	8.27185e-09	11.7724
320719	7.16895	3.55728	1.23269	2.88579	0.00390427	0.00857504	11.7719
228071	3023.64	3.55726	0.448382	7.93355	2.12964e-15	2.30831e-14	11.7718
17129	1619.32	3.55711	0.482691	7.36932	1.71497e-13	1.57231e-12	11.7705
546144	3.6787	3.55492	1.31298	2.70752	0.0067788	0.0141155	11.7527
232680	8.69432	3.55254	0.972378	3.65346	0.00025873	0.000713985	11.7334
93703	348.685	3.55018	0.416082	8.53239	1.43357e-17	1.92825e-16	11.7141
100041874	3.49932	3.549	1.22745	2.89136	0.00383578	0.00844161	11.7046
13688	880.102	3.54786	0.54684	6.48794	8.70201e-11	5.94776e-10	11.6954
107932	10932.2	3.54782	0.263777	13.4501	3.07531e-41	1.98813e-39	11.695
74711	50.1519	3.54471	0.749302	4.73069	2.23759e-06	8.57901e-06	11.6699
100040852	3.70047	3.54369	1.34178	2.64103	0.00826544	0.0168439	11.6616
242773	637.698	3.54224	0.435282	8.1378	4.02526e-16	4.74674e-15	11.6498
100503793	62.2636	3.54193	0.742096	4.77288	1.81614e-06	7.04738e-06	11.6474
15404	1281.36	3.54183	0.682806	5.18717	2.13511e-07	9.45623e-07	11.6466
627872	22.2102	3.54068	0.728274	4.86175	1.16355e-06	4.62253e-06	11.6373
269637	3.98922	3.53828	1.49589	2.36532	0.0180143	0.033766	11.6179
22779	66.2326	3.53744	0.810571	4.36414	1.27627e-05	4.35887e-05	11.6112
214162	4087.86	3.5368	0.701308	5.04315	4.57932e-07	1.92593e-06	11.606
140488	880.401	3.53602	0.40982	8.62824	6.23038e-18	8.66532e-17	11.5998
628327	16.0172	3.53436	0.846087	4.1773	2.94984e-05	9.50131e-05	11.5864
328381	24.5586	3.53247	0.7887	4.47884	7.50481e-06	2.65575e-05	11.5712
98970	137.611	3.53237	0.750204	4.70855	2.49486e-06	9.50744e-06	11.5704
107895	932.871	3.53188	0.727602	4.85413	1.20915e-06	4.7944e-06	11.5665
64103	3.72359	3.53177	1.38423	2.55142	0.0107284	0.021272	11.5656
12297	3640.51	3.52634	0.696748	5.06113	4.16769e-07	1.76051e-06	11.5221
17268	1637.68	3.52555	0.442619	7.96519	1.64971e-15	1.80365e-14	11.5158
246229	368.483	3.52377	0.503086	7.00431	2.48203e-12	2.0127e-11	11.5017
100503601	3.46443	3.52333	1.2421	2.8366	0.00455962	0.0098817	11.4982
26757	9154.28	3.52179	0.425197	8.28273	1.20383e-16	1.49961e-15	11.4859
68693	3973.47	3.51923	0.280121	12.5633	3.36163e-36	1.63639e-34	11.4655
330440	3.53394	3.51762	1.30234	2.701	0.00691319	0.0143638	11.4527
68703	4223.02	3.51749	0.400383	8.78533	1.55904e-18	2.32026e-17	11.4517
75870	3.56771	3.51687	1.32027	2.66375	0.0077275	0.0158842	11.4468
192190	3.80969	3.51683	1.44236	2.43826	0.0147583	0.0283185	11.4465
26877	728.387	3.51573	0.313028	11.2313	2.86079e-29	8.96381e-28	11.4378
18676	2161.64	3.51426	0.554968	6.33236	2.41432e-10	1.56639e-09	11.4261
76551	1479.29	3.51425	0.625012	5.6227	1.87996e-08	9.61797e-08	11.426
18095	3.45634	3.51383	1.24285	2.82724	0.00469515	0.0101485	11.4227
224836	1045.82	3.51135	0.491247	7.14783	8.81626e-13	7.55363e-12	11.4031
632687	3.61039	3.51114	1.3536	2.59394	0.00948844	0.0190538	11.4014
230971	163.544	3.50998	0.594969	5.89944	3.64748e-09	2.0487e-08	11.3923
11477	414.564	3.50997	0.382916	9.16642	4.88967e-20	8.22793e-19	11.3921
18599	3.72028	3.50637	1.41486	2.47824	0.0132032	0.0256413	11.3637
667736	3.45441	3.50623	1.25483	2.79418	0.00520309	0.0111215	11.3627
217342	2510.82	3.50597	0.324272	10.8118	3.02577e-27	8.34562e-26	11.3606
100503212	5.87039	3.5057	1.07892	3.24928	0.00115698	0.00284137	11.3585
77682	3.86248	3.50498	1.47421	2.37753	0.0174292	0.0328122	11.3528
329482	3.57279	3.50348	1.33003	2.63414	0.00843513	0.0171428	11.341
12062	6.01866	3.50269	1.03883	3.37176	0.000746889	0.00190016	11.3348
57354	1158.03	3.50268	0.543626	6.44319	1.16991e-10	7.86816e-10	11.3348
319871	3.65661	3.50229	1.39621	2.50843	0.012127	0.0237885	11.3317
12300	494.792	3.50227	1.30323	2.68738	0.00720153	0.0149137	11.3315
52915	5276.04	3.50167	0.237963	14.7151	5.15336e-49	5.17106e-47	11.3268
433082	52.7874	3.5015	0.840413	4.1664	3.09446e-05	9.93791e-05	11.3255
74196	225.57	3.5011	0.456589	7.66796	1.74754e-14	1.74498e-13	11.3224
11536	18.9203	3.50086	0.749113	4.67334	2.96347e-06	1.11683e-05	11.3204
545486	4.41073	3.49931	1.66862	2.09713	0.0359825	0.0625231	11.3083
320655	114.174	3.49852	0.764386	4.5769	4.71917e-06	1.72292e-05	11.3021
276952	1422.56	3.49799	0.395292	8.84915	8.81909e-19	1.34557e-17	11.298
14810	279.37	3.49777	0.364975	9.58357	9.37439e-22	1.78495e-20	11.2962
29867	367.68	3.49658	0.786458	4.44598	8.7492e-06	3.06625e-05	11.2869
80913	2600.18	3.49303	0.534485	6.53532	6.34755e-11	4.40104e-10	11.2592
104175	20915.9	3.49175	0.459261	7.60298	2.89383e-14	2.84273e-13	11.2492
22154	7784.28	3.49136	0.13473	25.9138	4.65208e-148	1.08699e-144	11.2462
67607	424.54	3.49111	0.405586	8.60758	7.46221e-18	1.02997e-16	11.2442
109292	3.50868	3.48919	1.32043	2.64247	0.00823032	0.0167808	11.2293
71153	3.47057	3.48882	1.30224	2.67909	0.00738229	0.0152552	11.2263
378775	3.51793	3.4886	1.32613	2.63067	0.00852163	0.0172971	11.2247
237858	3.53958	3.48649	1.35188	2.579	0.0099086	0.0197785	11.2083
212753	3.47474	3.48624	1.3076	2.66613	0.00767296	0.015788	11.2063
100034739	22.5654	3.48606	0.837324	4.16333	3.13635e-05	0.000100703	11.2049
109135	944.327	3.48594	0.626944	5.56022	2.69433e-08	1.35138e-07	11.204
56386	766.378	3.48249	0.517296	6.7321	1.6723e-11	1.24554e-10	11.1772
23967	6.33692	3.48173	1.30059	2.67704	0.00742753	0.0153428	11.1713
433586	1382.01	3.48123	0.635173	5.48076	4.23513e-08	2.06344e-07	11.1675
13599	1510.83	3.48062	1.32458	2.62771	0.00859605	0.0174259	11.1628
75600	6.10769	3.48055	1.08282	3.21434	0.00130746	0.00317423	11.1622
668917	44.9928	3.47831	0.62219	5.59044	2.26495e-08	1.14727e-07	11.1449
320466	18.2406	3.47691	0.754815	4.60631	4.0988e-06	1.51229e-05	11.1341
72720	234.191	3.47407	0.315592	11.0081	3.49355e-28	1.02586e-26	11.1122
227867	1292.75	3.47405	0.302831	11.4719	1.82602e-30	6.15802e-29	11.112
16867	5.69714	3.47007	1.08337	3.20303	0.00135991	0.00328694	11.0814
331480	26.3548	3.466	0.665349	5.2093	1.89553e-07	8.45239e-07	11.0502
116810	3.59473	3.45976	1.41723	2.44121	0.014638	0.0281008	11.0025
21463	32.0203	3.45954	0.621652	5.56507	2.62043e-08	1.31673e-07	11.0008
407821	119.526	3.45893	0.556057	6.22045	4.95721e-10	3.09939e-09	10.9962
13483	1573.61	3.45864	0.63971	5.40657	6.42419e-08	3.0527e-07	10.994
224727	7498.31	3.45843	0.288763	11.9767	4.70619e-33	1.84149e-31	10.9923
100502869	3.5754	3.45817	1.40632	2.45902	0.0139319	0.0268936	10.9904
245666	166.729	3.45652	0.805136	4.29309	1.76202e-05	5.87794e-05	10.9778
98741	104.858	3.45519	0.963107	3.58755	0.000333801	0.000902123	10.9677
319552	3.42061	3.45456	1.31584	2.62535	0.00865587	0.0175369	10.9629
319527	81.5509	3.45289	0.589816	5.85419	4.79336e-09	2.64955e-08	10.9503
20957	13.285	3.45259	0.914322	3.77612	0.000159288	0.000455634	10.948
211429	531.288	3.45123	0.514396	6.7093	1.95566e-11	1.43955e-10	10.9377
72978	25.3073	3.4484	0.860893	4.00561	6.18582e-05	0.000189486	10.9162
15401	421.238	3.44693	0.668031	5.15983	2.47172e-07	1.08268e-06	10.9051
100126242	5.9605	3.44619	1.08959	3.16283	0.00156244	0.00372525	10.8995
353342	7036.85	3.4453	0.2283	15.0911	1.85336e-51	2.11983e-49	10.8928
243529	637.577	3.44465	0.441302	7.80565	5.9194e-15	6.17854e-14	10.8879
192653	3.50771	3.44411	1.40285	2.45509	0.014085	0.0271443	10.8838
79235	3.34866	3.44404	1.29509	2.6593	0.00783027	0.0160692	10.8833
13983	3.43676	3.44293	1.35014	2.55005	0.0107707	0.0213507	10.8749
16858	5.79693	3.44068	1.18001	2.91581	0.00354768	0.00785088	10.8579
18213	808.623	3.43979	0.634405	5.42207	5.89132e-08	2.81338e-07	10.8512
11441	168.393	3.4395	0.563579	6.10297	1.04117e-09	6.23103e-09	10.8491
93707	341.62	3.43861	0.504273	6.81894	9.17156e-12	6.96749e-11	10.8424
432830	3.29799	3.43512	1.29143	2.65992	0.00781582	0.0160436	10.8162
545667	10.5188	3.43336	0.907878	3.78175	0.000155732	0.000446555	10.803
627828	8.00327	3.43301	0.958337	3.58226	0.000340631	0.000919366	10.8004
12427	3.73099	3.43266	1.51844	2.26066	0.0237806	0.0433466	10.7978
54698	3.22563	3.43201	1.23845	2.77121	0.00558492	0.0118463	10.7929
66673	526.864	3.43167	0.500052	6.86264	6.76001e-12	5.22034e-11	10.7904
18770	11.8569	3.43162	0.908994	3.77518	0.000159891	0.00045728	10.79
100986	5909.28	3.43095	0.350346	9.79303	1.20626e-22	2.44178e-21	10.785
12454	582.913	3.42762	0.495561	6.91666	4.62411e-12	3.6414e-11	10.7601
171395	5.59422	3.42579	1.1149	3.07273	0.00212109	0.00492372	10.7465
12652	1380.7	3.42241	0.405816	8.43341	3.35724e-17	4.38587e-16	10.7213
26942	82.7821	3.42094	0.712624	4.80048	1.58287e-06	6.18922e-06	10.7104
69248	3.28303	3.4187	1.29188	2.6463	0.00813764	0.0166104	10.6938
75305	15.3735	3.4165	0.833163	4.10064	4.1201e-05	0.000130093	10.6775
231724	87.9357	3.41416	0.747709	4.56616	4.96743e-06	1.8059e-05	10.6602
237400	1726.73	3.41373	0.557669	6.12143	9.27412e-10	5.58496e-09	10.657
329252	3.16922	3.41371	1.22564	2.78524	0.00534882	0.0114017	10.6568
13489	8.28348	3.41319	0.907096	3.76277	0.000168041	0.000478329	10.653
72818	3.44071	3.41165	1.40507	2.4281	0.0151781	0.029032	10.6416
434436	3.27333	3.40862	1.29389	2.63441	0.00842847	0.0171314	10.6193
234988	3.30326	3.40856	1.32009	2.58207	0.009821	0.0196324	10.6189
18162	125.75	3.40299	1.21838	2.79306	0.00522125	0.0111574	10.578
239618	645.205	3.40298	0.494016	6.88841	5.64177e-12	4.40672e-11	10.5779
69632	3676.67	3.40263	0.43701	7.78615	6.9083e-15	7.16956e-14	10.5753
100503703	3.32262	3.40139	1.36186	2.49761	0.0125035	0.0244304	10.5663
104886	247.891	3.40019	0.654424	5.1957	2.0395e-07	9.05486e-07	10.5575
71436	916.96	3.39895	0.427948	7.94244	1.9824e-15	2.15442e-14	10.5484
436049	3.23546	3.39822	1.30822	2.59759	0.00938804	0.0188753	10.543
81879	5.72549	3.39818	1.20388	2.8227	0.00476207	0.0102823	10.5428
11488	1446.59	3.39726	0.527315	6.44257	1.17471e-10	7.89381e-10	10.5361
240068	320.224	3.39666	0.36418	9.32688	1.0903e-20	1.93416e-19	10.5317
613263	11.0444	3.38796	0.908883	3.72761	0.000193303	0.000544926	10.4684
269209	550.258	3.38776	0.487055	6.9556	3.51058e-12	2.80915e-11	10.4669
414095	17.4577	3.38571	0.765969	4.42017	9.8623e-06	3.42334e-05	10.452
100043261	3.14469	3.38484	1.2621	2.68191	0.00732042	0.0151369	10.4457
21750	843.359	3.38469	0.332829	10.1695	2.71431e-24	6.08989e-23	10.4446
93704	208.14	3.38443	0.504681	6.70608	1.99927e-11	1.47033e-10	10.4428
100504196	49.5894	3.38339	0.433329	7.8079	5.81496e-15	6.07728e-14	10.4352
66985	203.297	3.38281	0.424261	7.97341	1.54355e-15	1.69666e-14	10.431
56072	3.11846	3.38255	1.25163	2.70251	0.00688176	0.0143076	10.4291
14296	349.21	3.38215	0.463464	7.29754	2.93075e-13	2.62228e-12	10.4263
107869	5.83333	3.38034	1.12422	3.00682	0.00263996	0.00602303	10.4132
69732	10.2091	3.38034	0.945519	3.57511	0.000350077	0.000942066	10.4132
231861	6085.36	3.38033	0.458539	7.37197	1.68121e-13	1.54223e-12	10.4131
66333	32.3825	3.37931	0.660926	5.11299	3.17103e-07	1.36668e-06	10.4057
72401	12.0026	3.37808	1.10073	3.06894	0.00214818	0.00497884	10.3969
22696	404.837	3.37727	0.415562	8.127	4.4003e-16	5.17035e-15	10.3911
13388	698.918	3.37426	0.37524	8.99227	2.42179e-19	3.86446e-18	10.3694
56741	348.084	3.37345	0.388056	8.69321	3.5233e-18	5.03293e-17	10.3636
15371	3.69312	3.37159	1.57837	2.13612	0.0326697	0.0574627	10.3503
16069	3.20751	3.37146	1.31836	2.55732	0.0105483	0.0209403	10.3493
408062	73.5294	3.37055	0.711626	4.73641	2.1754e-06	8.35819e-06	10.3428
414089	3.22122	3.36914	1.34515	2.50465	0.0122573	0.0240067	10.3327
68947	307.693	3.36625	0.616593	5.45944	4.77629e-08	2.30718e-07	10.312
30785	710.692	3.36607	0.499684	6.7364	1.62362e-11	1.21039e-10	10.3107
100504469	3.11794	3.36441	1.26906	2.65111	0.00802279	0.016417	10.2988
100041279	3.19981	3.36439	1.32579	2.53766	0.0111598	0.0220552	10.2987
70458	127.247	3.36379	0.695244	4.83829	1.30964e-06	5.17276e-06	10.2944
100502828	8.11221	3.35943	0.932364	3.60313	0.000314407	0.000853233	10.2633
100526540	3.36662	3.35835	1.44094	2.33067	0.0197708	0.0367051	10.2557
17777	81.7108	3.35624	0.576892	5.81779	5.96325e-09	3.25008e-08	10.2407
101544	65.9874	3.35589	0.45193	7.42567	1.12209e-13	1.04278e-12	10.2382
17996	19.3968	3.35572	0.852563	3.93604	8.28385e-05	0.000248881	10.237
20273	1026.16	3.35539	0.606688	5.53068	3.18997e-08	1.5825e-07	10.2347
20359	1008.41	3.35395	0.580341	5.77928	7.50218e-09	4.02974e-08	10.2244
11819	826.392	3.35358	0.907646	3.69481	0.000220052	0.000614927	10.2218
231474	259.664	3.35337	0.447655	7.49096	6.83699e-14	6.50906e-13	10.2203
56839	31.3673	3.35325	0.554652	6.04568	1.48784e-09	8.78522e-09	10.2195
100862252	3.19937	3.35261	1.34589	2.491	0.0127384	0.0248507	10.2149
244867	561.265	3.35206	0.583946	5.74036	9.44776e-09	5.00413e-08	10.211
170483	111.52	3.35168	0.629029	5.32835	9.91099e-08	4.59089e-07	10.2084
103775	3.09782	3.34796	1.2959	2.5835	0.00978046	0.0195716	10.1821
69602	9.83978	3.34711	0.866959	3.86075	0.000113039	0.000331218	10.1761
194219	3.20245	3.34613	1.35739	2.46512	0.0136967	0.0265116	10.1692
100040682	10.3324	3.3447	0.821768	4.07012	4.69881e-05	0.000146695	10.1591
216835	3.04554	3.34313	1.25167	2.67094	0.00756382	0.0155909	10.148
100861866	8.14086	3.34166	0.955394	3.49767	0.000469334	0.00123873	10.1377
[truncated: 1,716 more rows]

## Sheet: Postnatally enriched genes
NCBI GeneID	Base mean	log2(FC)	StdErr	Wald-Stats	P-value	P-adj	Fold change
17433	198440	-15.6259	0.84364	-18.522	1.3713e-76	4.6727e-74	50568
20203	48756.5	-14.5173	0.71386	-20.3364	6.12692e-92	2.78367e-89	23450.8
17196	4.41286e+06	-13.9302	0.581409	-23.9593	7.39426e-127	8.63861e-124	15609.7
171469	1422.22	-13.8188	1.16961	-11.8149	3.2683e-32	1.22888e-30	14450.5
19144	921.917	-13.5835	1.24052	-10.9498	6.65693e-28	1.90684e-26	12275.4
18823	516583	-13.3044	0.525873	-25.2996	3.22815e-141	5.86663e-138	10116
17153	16401.1	-13.1689	0.671665	-19.6063	1.36625e-85	5.72983e-83	9209.26
14580	1049	-12.9973	1.11207	-11.6874	1.47772e-31	5.3591e-30	8176.56
320981	3251.53	-12.9822	0.744808	-17.4302	4.86342e-68	9.70074e-66	8091.47
230678	683.502	-12.8798	1.11329	-11.5691	5.91023e-31	2.04804e-29	7537.02
20284	843.461	-12.8706	0.96215	-13.3769	8.24951e-41	5.2694e-39	7489.26
77767	5443.21	-12.7802	0.937279	-13.6355	2.46405e-42	1.70771e-40	7034.56
241159	531.095	-12.5409	1.45199	-8.63704	5.76901e-18	8.04416e-17	5959.16
227929	1247.32	-12.5176	1.2875	-9.72242	2.41969e-22	4.79135e-21	5863.63
338521	3762.67	-12.3999	0.769841	-16.1071	2.2741e-58	3.20649e-56	5404.36
23833	1997.02	-12.264	1.38919	-8.82821	1.06365e-18	1.60934e-17	4918.62
12955	6388.33	-12.1606	0.933422	-13.0279	8.48783e-39	4.722e-37	4578.16
67330	340.239	-12.1406	0.888987	-13.6567	1.84196e-42	1.29301e-40	4515.32
242546	312.575	-12.1072	1.24156	-9.75163	1.8153e-22	3.63416e-21	4412.01
226115	295.335	-11.9816	1.28335	-9.33617	9.98773e-21	1.78145e-19	4044.01
17067	244.559	-11.9328	1.11198	-10.7311	7.26878e-27	1.9458e-25	3909.56
56173	480.537	-11.9036	1.13171	-10.5183	7.117e-26	1.81035e-24	3831.23
17136	15203.9	-11.6344	0.549275	-21.1813	1.42009e-99	8.93347e-97	3179.04
67272	3839.01	-11.6173	0.65545	-17.7241	2.73073e-70	6.66624e-68	3141.61
22041	42444.4	-11.4599	0.506486	-22.6264	2.38403e-113	1.94966e-110	2816.98
14960	363.328	-11.2829	0.891346	-12.6583	1.00635e-36	5.08022e-35	2491.75
14618	1859.67	-11.2679	0.92088	-12.236	1.99512e-34	8.61006e-33	2465.96
12986	1068.54	-11.1325	1.34491	-8.27749	1.25803e-16	1.56355e-15	2244.93
20198	144.239	-11.1046	1.21223	-9.1605	5.16577e-20	8.67467e-19	2202.06
66329	242.739	-11.0509	1.45595	-7.59015	3.19525e-14	3.12009e-13	2121.55
76933	216.206	-11.042	2.01467	-5.48079	4.23428e-08	2.06344e-07	2108.44
21926	971.257	-11.0338	1.35351	-8.15197	3.58035e-16	4.25274e-15	2096.57
214112	496.482	-11.0182	0.911505	-12.0879	1.22341e-33	5.02766e-32	2074.01
51791	382.563	-10.9315	2.17441	-5.02735	4.97307e-07	2.08242e-06	1953.07
12374	172.142	-10.9258	1.16662	-9.36528	7.58482e-21	1.36929e-19	1945.27
66222	943.272	-10.8948	1.28746	-8.46228	2.62198e-17	3.44735e-16	1904.01
107993	1131.97	-10.8337	0.833037	-13.0051	1.14481e-38	6.34732e-37	1825.04
20684	512.716	-10.8304	1.38182	-7.83782	4.58427e-15	4.84369e-14	1820.91
11815	7446.4	-10.8159	0.734276	-14.73	4.13722e-49	4.17706e-47	1802.62
213019	7340.35	-10.775	0.700105	-15.3906	1.89292e-53	2.32786e-51	1752.3
16149	1897.6	-10.7353	0.771164	-13.9209	4.73214e-44	3.58328e-42	1704.66
11484	423.157	-10.7351	0.968489	-11.0844	1.49338e-28	4.5066e-27	1704.49
76960	24796.4	-10.7217	0.585643	-18.3075	7.20694e-75	2.1829e-72	1688.68
100040462	105.445	-10.6971	1.16598	-9.17432	4.54438e-20	7.67851e-19	1660.17
78416	132.178	-10.6196	1.50879	-7.03848	1.94354e-12	1.59181e-11	1573.34
20375	1353.77	-10.5792	1.23203	-8.58678	8.94371e-18	1.22515e-16	1529.89
20303	1048.37	-10.5708	1.20486	-8.77346	1.73254e-18	2.55753e-17	1520.95
73690	190.308	-10.4816	1.62883	-6.43503	1.23452e-10	8.26857e-10	1429.8
100502895	83.9629	-10.4223	1.14287	-9.11941	7.55348e-20	1.25426e-18	1372.19
12608	4221.09	-10.4088	1.01098	-10.2958	7.36092e-25	1.70531e-23	1359.49
668139	597.931	-10.3636	1.14603	-9.04301	1.52422e-19	2.46102e-18	1317.47
56696	120.485	-10.3589	1.25578	-8.24903	1.5969e-16	1.95941e-15	1313.26
233274	173.799	-10.3467	1.28414	-8.05726	7.80232e-16	8.96043e-15	1302.15
216445	868.951	-10.3431	1.18565	-8.72358	2.69537e-18	3.89104e-17	1298.95
13040	1820.61	-10.342	1.07459	-9.62415	6.32286e-22	1.21524e-20	1297.96
12493	637.643	-10.3285	0.880402	-11.7315	8.78555e-32	3.21468e-30	1285.81
29862	76.0583	-10.3181	1.1043	-9.34358	9.3129e-21	1.66836e-19	1276.61
12482	102.003	-10.3118	1.48453	-6.94622	3.75205e-12	2.9834e-11	1271.08
15945	593.326	-10.3016	2.06492	-4.98884	6.07434e-07	2.52098e-06	1262.06
98365	87.4134	-10.255	1.35227	-7.58352	3.36305e-14	3.28198e-13	1221.95
20345	764.855	-10.2506	1.12167	-9.13869	6.32123e-20	1.05392e-18	1218.26
20200	2068.14	-10.1854	0.615338	-16.5526	1.53323e-61	2.38833e-59	1164.46
27276	34237.7	-10.1656	0.566304	-17.9507	4.73616e-72	1.24943e-69	1148.53
20196	1061.55	-10.16	0.571916	-17.7649	1.32226e-70	3.27681e-68	1144.11
50778	241.798	-10.1514	1.42041	-7.14682	8.88108e-13	7.6012e-12	1137.34
219170	91.1306	-10.1155	1.13666	-8.89927	5.6215e-19	8.6987e-18	1109.34
14745	11443.5	-10.1046	0.773651	-13.061	5.50112e-39	3.11337e-37	1101.04
72054	696.976	-10.0958	1.22122	-8.267	1.37367e-16	1.69568e-15	1094.32
16178	1049.15	-10.0897	1.39358	-7.24013	NA	NA	1089.67
17750	92.2737	-10.0784	1.14999	-8.76391	1.88587e-18	2.77137e-17	1081.19
231507	384.944	-10.055	1.33835	-7.51299	5.77939e-14	5.53117e-13	1063.78
18557	1587.41	-10.0139	0.57244	-17.4934	1.60985e-68	3.41958e-66	1033.91
73940	1688.19	-9.91241	0.762344	-13.0026	1.18328e-38	6.53844e-37	963.682
100503605	88.5663	-9.9053	1.29962	-7.62169	2.50382e-14	2.47298e-13	958.945
319903	972.228	-9.89388	0.792787	-12.4799	9.61542e-36	4.61202e-34	951.378
14130	215.903	-9.8579	1.25817	-7.8351	4.68456e-15	4.94326e-14	927.945
16426	167.991	-9.84794	0.867259	-11.3552	6.98492e-30	2.28035e-28	921.562
320782	548.753	-9.80899	1.22181	-8.02821	9.89037e-16	1.11717e-14	897.015
12775	138.303	-9.78002	1.10903	-8.81851	1.15993e-18	1.74373e-17	879.185
12799	88298.4	-9.76752	0.518189	-18.8493	2.97512e-79	1.05785e-76	871.6
118446	1640.21	-9.74489	0.703825	-13.8456	1.35219e-43	9.78602e-42	858.033
225845	1106.79	-9.74418	0.742062	-13.1312	2.18113e-39	1.26955e-37	857.611
18173	677.764	-9.72936	1.26313	-7.70256	1.33372e-14	1.3449e-13	848.849
319493	63.5191	-9.68331	1.48925	-6.50215	7.91826e-11	5.43023e-10	822.178
18217	206.559	-9.66993	1.12543	-8.59219	8.53261e-18	1.1708e-16	814.59
626058	51.7193	-9.64944	1.23921	-7.78674	6.87595e-15	7.14052e-14	803.103
320587	3303.59	-9.64228	0.615861	-15.6566	2.99554e-55	3.8885e-53	799.127
67092	8289.06	-9.63221	0.56941	-16.9161	3.42182e-64	5.71095e-62	793.567
105418	139.357	-9.60381	1.24069	-7.74072	9.88525e-15	1.01115e-13	778.098
74131	616.644	-9.59059	1.14459	-8.37904	5.33634e-17	6.86712e-16	771.003
21952	254.722	-9.58322	0.964858	-9.93226	3.01357e-23	6.32733e-22	767.074
109032	104.259	-9.56951	1.35887	-7.04228	1.89124e-12	1.54976e-11	759.818
74559	1905.45	-9.56387	0.775114	-12.3387	5.60796e-35	2.5394e-33	756.854
320484	428.007	-9.55236	0.991722	-9.6321	5.85207e-22	1.12608e-20	750.841
14676	262.878	-9.54514	1.42208	-6.71208	1.91865e-11	1.41485e-10	747.09
12515	57.6931	-9.52051	1.51961	-6.26511	3.72573e-10	2.36102e-09	734.443
233080	53.1839	-9.51586	1.38734	-6.85907	6.93105e-12	5.34737e-11	732.081
11689	1176.97	-9.5003	0.861932	-11.0221	2.99005e-28	8.81887e-27	724.23
12506	272.143	-9.41137	2.33064	-4.03811	5.38829e-05	0.000166531	680.934
381339	42.1585	-9.40894	1.17845	-7.98419	1.41445e-15	1.56315e-14	679.785
100503558	67.3448	-9.40456	2.14159	-4.39139	1.1263e-05	3.87176e-05	677.727
667214	46.3563	-9.35292	1.40942	-6.63598	3.22348e-11	2.32363e-10	653.895
53897	9008.96	-9.33784	0.550562	-16.9605	1.60851e-64	2.74049e-62	647.097
12362	137.143	-9.32958	1.12983	-8.25753	1.48712e-16	1.82883e-15	643.402
22029	173.806	-9.32137	1.41946	-6.56683	5.13968e-11	3.6002e-10	639.752
110197	288.674	-9.31331	1.26668	-7.35252	1.9451e-13	1.77237e-12	636.189
16185	81.0167	-9.29562	2.20991	-4.20634	2.59545e-05	8.43288e-05	628.436
50914	7296.45	-9.27736	0.544621	-17.0345	4.5527e-65	7.92171e-63	620.533
83408	37.5077	-9.26443	1.1678	-7.93324	2.13509e-15	2.31268e-14	614.994
140497	338.207	-9.25581	1.55973	-5.93422	2.9525e-09	1.67794e-08	611.329
226652	856.869	-9.24673	1.06601	-8.67415	4.16667e-18	5.9158e-17	607.496
12047	47.8489	-9.23248	1.54359	-5.98118	2.2153e-09	1.27628e-08	601.526
242248	51.0654	-9.20787	1.26682	-7.26848	3.63544e-13	3.22108e-12	591.349
83430	350.11	-9.19591	0.965646	-9.52306	1.68147e-21	3.16116e-20	586.469
16994	235.254	-9.16953	0.877132	-10.454	1.4049e-25	3.49218e-24	575.841
108670	144.655	-9.14594	1.39815	-6.54147	6.09185e-11	4.23093e-10	566.505
67801	2700.26	-9.12512	0.568612	-16.0481	5.89596e-58	8.1724e-56	558.388
100313531	35.1113	-9.12007	1.30792	-6.97298	3.103e-12	2.49644e-11	556.435
22239	17236.8	-9.06682	0.548881	-16.5188	2.68902e-61	4.1492e-59	536.273
110454	34.6756	-9.06555	1.34156	-6.75746	1.40434e-11	1.05171e-10	535.799
18094	81.1402	-9.05928	1.06455	-8.50995	1.74012e-17	2.3177e-16	533.475
12766	161.638	-9.05847	2.33655	-3.87687	0.000105811	0.000311884	533.177
210940	153.116	-9.0247	2.33689	-3.86185	NA	NA	520.843
18600	2578.19	-9.01455	0.73369	-12.2866	1.0692e-34	4.75213e-33	517.189
27056	572.362	-8.96859	1.17574	-7.62803	2.3837e-14	2.35718e-13	500.973
140571	2018.15	-8.96492	0.484358	-18.5089	1.75196e-76	5.82181e-74	499.7
16019	1037.99	-8.95226	1.03954	-8.61174	7.19593e-18	9.95741e-17	495.334
72834	2340.66	-8.95083	0.670986	-13.3398	1.35783e-40	8.38061e-39	494.846
12478	111.11	-8.94118	1.28574	-6.95412	3.5477e-12	2.83469e-11	491.547
23880	735.566	-8.93963	1.22944	-7.2713	3.56042e-13	3.15804e-12	491.017
56356	30115.7	-8.93118	0.507245	-17.6072	2.16768e-69	4.92425e-67	488.151
76088	1612.26	-8.88348	1.04874	-8.47067	2.43996e-17	3.21579e-16	472.275
100046078	70.4256	-8.87164	0.977692	-9.07407	1.14656e-19	1.88285e-18	468.415
23945	4699.08	-8.84441	0.551837	-16.0272	8.24993e-58	1.12447e-55	459.655
60504	87.646	-8.83164	1.37154	-6.43923	1.20079e-10	8.05256e-10	455.605
20193	931.899	-8.81925	0.654864	-13.4673	2.4362e-41	1.60026e-39	451.71
233079	127.38	-8.8124	1.49593	-5.89091	3.84068e-09	2.14983e-08	449.57
77974	245.208	-8.79764	1.38218	-6.36503	1.95246e-10	1.27738e-09	444.993
16408	1501.6	-8.77208	1.07989	-8.12314	4.54273e-16	5.33005e-15	437.179
11867	6519.26	-8.7529	0.371677	-23.5497	1.26326e-122	1.37746e-119	431.405
70134	36.1493	-8.71877	1.22985	-7.08931	1.34783e-12	1.12647e-11	421.318
402757	115.251	-8.71714	1.44033	-6.05219	1.42893e-09	8.44957e-09	420.843
18783	492.949	-8.71553	0.676469	-12.8839	5.54862e-38	2.97552e-36	420.374
58807	409.807	-8.6972	0.993953	-8.75012	2.13133e-18	3.11807e-17	415.068
14017	807.576	-8.67664	0.458505	-18.9238	7.26738e-80	2.70148e-77	409.194
93675	93.8802	-8.66993	2.33844	-3.70756	0.000209263	0.000586581	407.296
22780	128.531	-8.66235	1.46689	-5.90523	3.52155e-09	1.98342e-08	405.161
16197	93.0795	-8.6573	2.33847	-3.70213	0.000213798	0.000598473	403.746
12978	4454.5	-8.6347	1.10477	-7.81586	5.45889e-15	5.72343e-14	397.47
69169	70.9084	-8.63337	1.36071	-6.34473	2.22813e-10	1.45019e-09	397.103
276950	37.8603	-8.6331	1.76806	-4.88281	1.04585e-06	4.1957e-06	397.028
100126226	88.8295	-8.62746	2.33851	-3.6893	0.000224876	0.000626694	395.48
15985	97.0984	-8.60828	1.41203	-6.09639	1.0849e-09	6.48561e-09	390.256
70719	2184.93	-8.59422	0.884229	-9.71945	2.4913e-22	4.92122e-21	386.471
11829	653.005	-8.5911	0.860737	-9.9811	1.8442e-23	3.93269e-22	385.637
17084	215.661	-8.58604	1.00015	-8.58473	9.10466e-18	1.24616e-16	384.288
270152	89.2141	-8.52554	2.16736	-3.9336	8.36841e-05	0.000251098	368.505
233836	132.97	-8.51985	0.864801	-9.8518	6.73259e-23	1.38688e-21	367.055
94346	269.183	-8.51572	0.730674	-11.6546	2.17371e-31	7.7627e-30	366.005
170744	76.4098	-8.51496	2.33871	-3.64089	0.000271702	0.000747134	365.813
12481	42.7452	-8.50818	1.25963	-6.7545	1.43328e-11	1.0724e-10	364.096
76681	76.6608	-8.4796	1.22105	-6.94452	3.79745e-12	3.01803e-11	356.955
243958	72.7741	-8.47759	2.33877	-3.6248	0.000289184	0.000791349	356.459
272465	28.4388	-8.47394	1.22438	-6.92102	4.484e-12	3.53618e-11	355.558
240913	3276.81	-8.4721	0.629641	-13.4554	2.86018e-41	1.86379e-39	355.104
52570	38.4565	-8.45813	1.59697	-5.29637	1.18129e-07	5.41361e-07	351.684
17085	71.3211	-8.45498	2.33882	-3.61507	0.000300271	0.000819357	350.915
67775	125.758	-8.45229	0.96332	-8.77413	1.72234e-18	2.54477e-17	350.262
16182	32.3398	-8.44364	1.76177	-4.79269	1.64557e-06	6.42056e-06	348.168
381417	69.7633	-8.4347	2.33886	-3.60633	0.000310554	0.000843898	346.016
319819	33.8422	-8.4326	1.48059	-5.69545	1.23047e-08	6.42782e-08	345.514
58222	972.188	-8.4298	0.579205	-14.5541	5.50191e-48	5.32481e-46	344.845
227753	27831.4	-8.42685	0.511773	-16.466	6.4379e-61	9.74984e-59	344.14
16803	461.817	-8.40854	1.09977	-7.64575	2.07732e-14	2.06169e-13	339.798
118454	1321.54	-8.39839	0.651681	-12.8873	5.30901e-38	2.85639e-36	337.417
71398	91.9816	-8.39759	2.18362	-3.84572	0.000120201	0.000350386	337.23
68994	24.7112	-8.39635	1.48634	-5.64901	1.61377e-08	8.31859e-08	336.94
15950	19.1013	-8.36975	1.11148	-7.53026	5.06375e-14	4.88629e-13	330.786
12483	25.7076	-8.36167	1.20353	-6.9476	3.71559e-12	2.96017e-11	328.937
16970	469.462	-8.35187	1.16888	-7.1452	8.98635e-13	7.68326e-12	326.711
380823	22.1624	-8.34963	1.45667	-5.732	9.92537e-09	5.2503e-08	326.203
319430	62.0029	-8.34904	2.33904	-3.56944	0.00035775	0.000960971	326.071
226421	553.649	-8.33793	0.888168	-9.38778	6.12791e-21	1.11241e-19	323.568
80782	56.3639	-8.31972	1.66155	-5.0072	5.52287e-07	2.30087e-06	319.511
83433	123.579	-8.31826	1.00883	-8.24545	1.64546e-16	2.01748e-15	319.188
72318	712.628	-8.3131	1.08214	-7.68209	1.56516e-14	1.56669e-13	318.048
14319	324303	-8.30653	0.589187	-14.0983	3.89151e-45	3.16664e-43	316.602
15002	58.0287	-8.30231	2.33914	-3.5493	0.000386255	0.00103262	315.679
317758	92.7342	-8.30199	1.09295	-7.59597	3.05498e-14	2.99384e-13	315.609
217169	84.0872	-8.29722	1.49169	-5.56228	2.6627e-08	1.33592e-07	314.566
17441	8464.85	-8.29262	0.58151	-14.2605	3.85735e-46	3.35589e-44	313.564
574402	4502.48	-8.29001	0.749094	-11.0667	1.81958e-28	5.43084e-27	312.997
72446	1660.1	-8.27439	0.483457	-17.115	1.14648e-65	2.01632e-63	309.627
13051	1129.99	-8.26238	0.915748	-9.02255	1.83762e-19	2.95537e-18	307.06
52668	272.247	-8.26019	1.02519	-8.05719	7.80668e-16	8.96043e-15	306.594
14263	424.293	-8.25735	0.973432	-8.48272	2.19997e-17	2.90887e-16	305.992
105855	1138.32	-8.21458	1.09905	-7.47427	7.76345e-14	7.34832e-13	297.054
100042926	20.8429	-8.21368	1.40726	-5.83665	5.32619e-09	2.92669e-08	296.869
17858	106.54	-8.19728	1.09753	-7.46888	8.08827e-14	7.62049e-13	293.513
59010	506.924	-8.18847	1.25957	-6.501	7.97869e-11	5.46709e-10	291.725
15900	322.693	-8.18388	1.0003	-8.18145	2.80451e-16	3.36789e-15	290.8
100503361	40.6851	-8.1711	1.4518	-5.62824	1.82061e-08	9.32599e-08	288.234
14469	83.5826	-8.15734	0.936321	-8.71212	2.98242e-18	4.29405e-17	285.498
100504379	25.4392	-8.15278	1.75376	-4.64873	3.33987e-06	1.24976e-05	284.597
381924	23.5655	-8.15106	1.11978	-7.27919	3.3584e-13	2.98858e-12	284.259
106347	80.0959	-8.10901	1.49237	-5.43363	5.52182e-08	2.65086e-07	276.093
16541	810.063	-8.10607	1.00865	-8.03655	9.24053e-16	1.04811e-14	275.531
236312	22.5953	-8.09273	1.69225	-4.78224	1.73349e-06	6.74266e-06	272.995
18725	24.2124	-8.0925	1.75238	-4.618	3.87465e-06	1.43477e-05	272.95
56212	2531.27	-8.07966	0.318092	-25.4004	2.49756e-142	5.10626e-139	270.532
16161	73.6213	-8.07207	1.55785	-5.18155	2.2005e-07	9.72214e-07	269.113
110787	23.1426	-8.0605	1.73634	-4.64223	3.44672e-06	1.28621e-05	266.964
18018	556.315	-8.04307	0.861718	-9.33376	1.02183e-20	1.8206e-19	263.757
14709	294.798	-8.01924	0.947755	-8.46129	2.64432e-17	3.47394e-16	259.436
17748	482.876	-8.015	0.715934	-11.1952	4.30554e-29	1.33881e-27	258.676
216984	868.148	-8.01171	1.1726	-6.83242	8.34932e-12	6.3665e-11	258.087
18722	39.2783	-7.99304	2.33998	-3.41586	0.000635805	0.00163793	254.768
100504591	38.3045	-7.97347	2.34004	-3.40741	0.000655828	0.00168553	251.336
208795	709.638	-7.95209	0.786094	-10.1159	4.69442e-24	1.0404e-22	247.638
20302	897.279	-7.95164	1.14276	-6.95829	3.44434e-12	2.7575e-11	247.561
71607	251.539	-7.94554	0.834382	-9.52267	1.6879e-21	3.16961e-20	246.517
100504549	13.5551	-7.94089	1.09528	-7.25007	4.16554e-13	3.66495e-12	245.723
12523	245.601	-7.94062	0.987966	-8.03733	9.18138e-16	1.04213e-14	245.676
80891	538.724	-7.93537	0.893161	-8.88459	6.41584e-19	9.87182e-18	244.785
107375	273.97	-7.92325	1.12587	-7.03743	1.95813e-12	1.60136e-11	242.737
18669	64.9258	-7.9146	0.917508	-8.62619	6.3427e-18	8.80655e-17	241.287
16174	224.414	-7.91452	1.63552	-4.83914	NA	NA	241.273
19225	137.885	-7.90829	0.889166	-8.89406	5.89165e-19	9.10811e-18	240.233
107526	49.4595	-7.90689	1.21845	-6.48932	8.6225e-11	5.89835e-10	240
17313	48.3414	-7.9033	1.10768	-7.135	9.67893e-13	8.22382e-12	239.404
17068	34.9023	-7.89802	2.34029	-3.3748	0.000738703	0.00188021	238.528
54519	240.022	-7.86806	1.18544	-6.63728	3.19523e-11	2.3053e-10	233.627
98256	18.5331	-7.86441	1.67646	-4.69108	2.71763e-06	1.03012e-05	233.036
216049	1290.65	-7.85868	0.611057	-12.8608	7.48117e-38	3.97279e-36	232.112
56620	33.1662	-7.85555	2.34045	-3.35643	0.000789545	0.00200121	231.61
16071	82.5249	-7.85057	2.16736	-3.62219	0.000292122	0.000798855	230.811
142681	33.1918	-7.8381	2.34051	-3.34889	0.000811367	0.00205175	228.826
69797	13.9805	-7.83695	1.19044	-6.58326	4.60236e-11	3.26154e-10	228.643
270150	19.2585	-7.83559	1.73267	-4.52226	6.11819e-06	2.1897e-05	228.427
14961	310.326	-7.8328	0.953334	-8.21622	2.10021e-16	2.55019e-15	227.985
67596	28.1792	-7.83256	1.72746	-4.53415	5.78356e-06	2.07721e-05	227.948
12262	735.429	-7.82968	0.771099	-10.1539	3.18273e-24	7.10187e-23	227.494
327959	31.5115	-7.8155	2.34059	-3.33911	0.000840476	0.00211685	225.268
51801	303.752	-7.81341	0.61108	-12.7862	1.95739e-37	1.01635e-35	224.942
56312	108.53	-7.81278	1.18968	-6.56712	5.12968e-11	3.59936e-10	224.844
12458	31.8039	-7.79971	2.34066	-3.33228	0.000861386	0.00216618	222.816
11839	25.7372	-7.79962	1.30977	-5.95494	2.60172e-09	1.48426e-08	222.802
170442	23.3799	-7.79622	1.18628	-6.57198	4.96504e-11	3.49132e-10	222.278
14121	22.0985	-7.79477	1.55616	-5.00896	5.47241e-07	2.28275e-06	222.055
208613	12.383	-7.77978	1.27782	-6.0883	1.14113e-09	6.81181e-09	219.759
268973	51.1143	-7.76844	1.37355	-5.65575	1.55171e-08	8.01633e-08	218.039
102132	19.943	-7.76357	1.40803	-5.51378	3.51211e-08	1.72868e-07	217.304
14164	267.006	-7.75715	0.717153	-10.8166	2.87304e-27	7.93775e-26	216.339
100504712	29.0314	-7.74893	2.34086	-3.3103	0.000931973	0.00232936	215.11
103140	20.0209	-7.73823	1.49483	-5.17666	2.25893e-07	9.96095e-07	213.521
110786	28.3799	-7.7297	2.34094	-3.30197	0.000960078	0.00239558	212.262
70839	513.374	-7.72254	0.778173	-9.92394	3.27577e-23	6.86903e-22	211.21
15000	28.0497	-7.72033	2.34098	-3.29791	0.000974059	0.00242713	210.888
19332	65.2501	-7.70787	1.45866	-5.28422	1.26243e-07	5.75802e-07	209.075
621603	27.374	-7.70059	2.34106	-3.28936	0.00100415	0.00249375	208.022
22778	363.626	-7.69673	1.19431	-6.44447	1.16003e-10	7.81123e-10	207.465
27219	96.5671	-7.69664	1.3461	-5.71773	1.07955e-08	5.68852e-08	207.453
319997	90.7619	-7.6956	1.33466	-5.76597	8.11903e-09	4.32557e-08	207.303
16421	658.685	-7.68386	0.542017	-14.1764	1.28212e-45	1.06449e-43	205.623
320871	21.4821	-7.67431	1.5153	-5.06454	4.09381e-07	1.73243e-06	204.267
11565	1450.44	-7.66793	0.371337	-20.6496	9.85278e-95	4.73977e-92	203.366
74229	14899.8	-7.66776	0.564835	-13.5752	5.61722e-42	3.78088e-40	203.342
216859	599.803	-7.66442	0.977711	-7.83915	4.53619e-15	4.79909e-14	202.871
28250	26.5032	-7.64623	2.3413	-3.26581	0.00109152	0.00269438	200.329
380684	14320.1	-7.64122	0.87212	-8.76167	1.92384e-18	2.82462e-17	199.636
16985	2424.79	-7.6411	0.905949	-8.43436	3.33017e-17	4.35398e-16	199.619
55932	26.4893	-7.64072	1.49381	-5.11494	3.13845e-07	1.35299e-06	199.566
19415	188.057	-7.63877	0.981087	-7.78602	6.91515e-15	7.17212e-14	199.296
58860	41.3971	-7.63628	1.09003	-7.00558	2.45965e-12	1.99653e-11	198.952
12527	3651.32	-7.62915	0.585049	-13.0402	7.22709e-39	4.04816e-37	197.971
16822	846.551	-7.62859	1.01907	-7.48587	7.10765e-14	6.75888e-13	197.895
69660	1113.29	-7.61668	0.426042	-17.8778	1.75734e-71	4.4911e-69	196.267
58861	23.2958	-7.59975	1.19199	-6.37569	1.82142e-10	1.19499e-09	193.978
12945	14.4231	-7.59926	1.48368	-5.12191	3.02462e-07	1.30633e-06	193.912
73061	25.9593	-7.59704	1.42211	-5.3421	9.18759e-08	4.27882e-07	193.615
18417	1352.87	-7.58934	0.746783	-10.1627	2.90835e-24	6.50738e-23	192.584
70163	13.1566	-7.58884	1.3664	-5.55388	2.79405e-08	1.39668e-07	192.517
240047	401.794	-7.58594	1.00443	-7.55246	4.27102e-14	4.14549e-13	192.13
229898	17.45	-7.58244	1.4761	-5.13683	2.79417e-07	1.21449e-06	191.665
12332	1001.12	-7.57164	0.916646	-8.26016	1.45482e-16	1.7918e-15	190.235
20128	104.174	-7.57	1.4883	-5.08635	3.65023e-07	1.55477e-06	190.02
26410	188.727	-7.56809	1.17132	-6.46115	1.03908e-10	7.02574e-10	189.768
69983	23.8799	-7.54664	1.45905	-5.1723	2.31234e-07	1.01778e-06	186.967
13036	616.623	-7.5406	0.790015	-9.54489	1.36252e-21	2.57635e-20	186.186
15040	442.289	-7.54015	0.746114	-10.1059	5.20178e-24	1.15129e-22	186.128
19668	15.0275	-7.53815	1.72397	-4.37256	1.22801e-05	4.20634e-05	185.87
327978	84.2486	-7.52387	0.875228	-8.59647	8.22073e-18	1.13085e-16	184.04
67080	36.1411	-7.51848	1.06824	-7.0382	1.94734e-12	1.59333e-11	183.353
67844	436.656	-7.50971	0.860824	-8.72387	2.68863e-18	3.88474e-17	182.242
53314	46.4885	-7.48357	1.22124	-6.12783	8.90863e-10	5.37674e-09	178.969
13733	441.137	-7.47928	1.09618	-6.82307	8.91166e-12	6.78897e-11	178.438
74191	152.082	-7.45467	1.0626	-7.01548	2.29156e-12	1.86565e-11	175.42
14581	52.5994	-7.43258	1.50023	-4.95428	7.25974e-07	2.99019e-06	172.754
12524	105.997	-7.41969	1.11417	-6.65937	2.74995e-11	1.99992e-10	171.218
22695	5836.69	-7.40921	0.96417	-7.68454	1.53544e-14	1.53883e-13	169.979
67647	134.811	-7.40479	0.991233	-7.47028	8.00237e-14	7.54826e-13	169.459
12259	450.021	-7.40428	0.838399	-8.83145	1.03325e-18	1.5648e-17	169.398
19224	435.274	-7.40179	0.86957	-8.51201	1.70939e-17	2.28235e-16	169.107
15242	224.249	-7.39784	1.07534	-6.87956	6.00367e-12	4.66474e-11	168.644
272382	45.5486	-7.39603	1.25319	-5.90177	3.59631e-09	2.02274e-08	168.433
382867	117.771	-7.39043	0.873941	-8.45644	2.7566e-17	3.61564e-16	167.78
57248	21.0984	-7.38219	1.83013	-4.0337	5.49065e-05	0.000169316	166.825
27027	146.82	-7.38049	1.056	-6.9891	2.76652e-12	2.23563e-11	166.628
100041230	12.1971	-7.37685	1.48391	-4.97122	6.65318e-07	2.74935e-06	166.208
231655	75.61	-7.36435	0.930249	-7.91653	2.44225e-15	2.63492e-14	164.774
54396	32.7182	-7.36433	1.20313	-6.12097	9.3007e-10	5.59706e-09	164.772
207839	205.738	-7.3552	0.703644	-10.453	1.41935e-25	3.52274e-24	163.733
66214	224.446	-7.35401	0.641186	-11.4694	1.87994e-30	6.32682e-29	163.597
545030	254.681	-7.35237	0.9532	-7.71336	1.22553e-14	1.24193e-13	163.412
12023	51.0571	-7.3491	1.10324	-6.6614	2.71231e-11	1.9743e-10	163.042
19260	197.184	-7.34873	1.29843	-5.65972	1.5162e-08	7.84776e-08	163
380797	22.9858	-7.34435	1.58477	-4.63433	3.58097e-06	1.33205e-05	162.506
19879	53.3949	-7.34351	1.33382	-5.50561	3.67895e-08	1.80591e-07	162.412
100043861	18.5523	-7.33957	2.34292	-3.13266	0.0017323	0.00409597	161.968
381199	3809.19	-7.3394	0.623211	-11.7767	5.14394e-32	1.91214e-30	161.95
236573	65.9656	-7.33025	1.26913	-5.77583	7.65738e-09	4.10636e-08	160.926
53313	1330.4	-7.32433	1.12243	-6.5254	6.78188e-11	4.68629e-10	160.267
320802	61.3251	-7.31531	0.758574	-9.6435	5.23733e-22	1.01016e-20	159.268
207920	41.6113	-7.31206	1.11347	-6.56693	5.13648e-11	3.6002e-10	158.91
13113	9.20218	-7.29477	1.36583	-5.34091	9.24835e-08	4.30344e-07	157.016
245945	64.7545	-7.27468	1.6082	-4.5235	6.08244e-06	2.17833e-05	154.845
58801	599.432	-7.27335	1.20304	-6.04582	1.48655e-09	8.7808e-09	154.702
101602	384.245	-7.26987	1.05664	-6.88015	5.97891e-12	4.65007e-11	154.33
243910	1058.88	-7.26723	0.805245	-9.02487	1.7991e-19	2.89626e-18	154.048
230726	16.4884	-7.25843	1.69325	-4.2867	1.81347e-05	6.03605e-05	153.111
15894	311.048	-7.25653	0.855749	-8.47975	2.25686e-17	2.97927e-16	152.909
237010	1854.62	-7.23318	0.626086	-11.553	7.12745e-31	2.44909e-29	150.454
100017	525.334	-7.23197	0.568546	-12.7201	4.57131e-37	2.33651e-35	150.328
20363	5996.55	-7.23153	0.561606	-12.8765	6.10241e-38	3.2618e-36	150.283
319269	121.503	-7.21832	1.37499	-5.24974	1.52316e-07	6.87058e-07	148.913
217826	141.69	-7.21556	0.603851	-11.9492	6.55195e-33	2.53342e-31	148.628
21354	267.07	-7.21394	0.520116	-13.8699	9.64293e-44	7.1045e-42	148.461
71586	89.9023	-7.2107	0.817782	-8.81738	1.17167e-18	1.75976e-17	148.128
74734	74.4991	-7.20752	1.3166	-5.47434	4.39148e-08	2.13644e-07	147.802
381337	59.2557	-7.20528	0.90704	-7.94373	1.96194e-15	2.13361e-14	147.572
100124684	15.9019	-7.20438	2.3438	-3.0738	0.00211353	0.00490757	147.48
18377	539.13	-7.20382	0.506086	-14.2344	5.60455e-46	4.77437e-44	147.423
64099	802.227	-7.19455	0.889954	-8.08418	6.25826e-16	7.23905e-15	146.479
11810	246.991	-7.19282	1.19194	-6.03456	1.594e-09	9.36476e-09	146.304
11812	18.8817	-7.19157	1.50994	-4.76282	1.90909e-06	7.38357e-06	146.177
74153	219.455	-7.17917	0.88522	-8.11003	5.06068e-16	5.91654e-15	144.925
94176	1558.29	-7.16714	0.725526	-9.87854	5.15791e-23	1.07059e-21	143.722
224109	1238.27	-7.16444	0.913827	-7.84003	4.50425e-15	4.76838e-14	143.453
330721	27.5023	-7.15699	1.17974	-6.06658	1.30665e-09	7.75456e-09	142.714
15959	52.9441	-7.12373	2.22119	-3.20716	0.0013405	0.00324626	139.462
17183	282.816	-7.11978	0.87894	-8.10042	5.47704e-16	6.37597e-15	139.081
104709	149.335	-7.11749	1.5076	-4.72106	2.34618e-06	8.9764e-06	138.86
23886	71.0407	-7.11715	0.937579	-7.59098	3.17484e-14	3.10387e-13	138.827
14247	335.278	-7.11381	0.789577	-9.00965	2.06715e-19	3.31799e-18	138.507
11816	7140.39	-7.10478	0.625054	-11.3667	6.12853e-30	2.01282e-28	137.642
12960	65.8466	-7.10262	1.2085	-5.87722	4.17206e-09	2.32261e-08	137.437
619288	17.9497	-7.09545	1.52521	-4.6521	3.28571e-06	1.2309e-05	136.755
12260	196.32	-7.09041	0.587096	-12.0771	1.3957e-33	5.67863e-32	136.278
12504	96.49	-7.08302	1.43854	-4.92377	8.48939e-07	3.4592e-06	135.582
235587	106.076	-7.07989	1.18937	-5.95266	2.63826e-09	1.50353e-08	135.288
667370	17.9284	-7.07523	1.55293	-4.55605	5.21249e-06	1.88911e-05	134.851
15953	53.2123	-7.06524	0.915243	-7.71953	1.16763e-14	1.18694e-13	133.921
12010	3451.12	-7.06394	0.823064	-8.5825	9.28344e-18	1.26639e-16	133.801
66375	872.96	-7.06105	0.984376	-7.17313	7.33016e-13	6.32343e-12	133.533
20821	116.79	-7.05819	1.29991	-5.42973	5.6438e-08	2.7011e-07	133.268
192897	608.195	-7.05231	0.667203	-10.57	4.10645e-26	1.05605e-24	132.726
77125	89.3682	-7.05154	1.16494	-6.05314	1.42048e-09	8.40264e-09	132.656
67664	32.9187	-7.04175	1.20674	-5.83536	5.36753e-09	2.94741e-08	131.758
12516	13.373	-7.04059	1.93514	-3.63829	0.000274454	0.000754069	131.652
66650	25.1278	-7.03395	1.54125	-4.5638	5.02351e-06	1.82407e-05	131.048
14431	1673.3	-7.02332	0.644145	-10.9033	1.11115e-27	3.13345e-26	130.086
53945	928.378	-7.02102	0.711163	-9.87259	5.47319e-23	1.13316e-21	129.879
21412	10.5438	-7.02004	1.62254	-4.32657	1.51453e-05	5.11598e-05	129.79
20750	161.153	-7.01995	1.17059	-5.99691	2.01106e-09	1.16559e-08	129.782
16669	12.7829	-7.01344	1.4249	-4.92207	8.56357e-07	3.48856e-06	129.198
622459	12.0796	-6.99401	1.34306	-5.2075	1.91399e-07	8.53004e-07	127.47
109901	100.56	-6.9897	0.654139	-10.6853	1.19209e-26	3.16523e-25	127.089
100861953	16.1785	-6.98939	1.8026	-3.87739	0.000105583	0.000311267	127.062
52840	12528.9	-6.98605	0.548769	-12.7304	4.00745e-37	2.05473e-35	126.768
12521	1094.71	-6.98269	0.427132	-16.3478	4.50787e-60	6.52484e-58	126.473
19253	181.74	-6.97664	0.790328	-8.82752	1.07022e-18	1.6178e-17	125.944
20724	25.2491	-6.97473	2.1642	-3.22277	0.00126955	0.00309092	125.777
18952	5191.18	-6.9742	0.559892	-12.4563	1.29186e-35	6.12455e-34	125.731
21786	9.40733	-6.9588	1.19092	-5.84319	5.1211e-09	2.82212e-08	124.396
56175	958.931	-6.95324	0.77646	-8.95505	3.39571e-19	5.3507e-18	123.918
16205	64.1024	-6.95208	0.636253	-10.9266	8.60073e-28	2.4465e-26	123.819
320784	7.84532	-6.95009	1.50366	-4.62211	3.7986e-06	1.40788e-05	123.648
20852	806.976	-6.94974	1.0038	-6.92341	4.40885e-12	3.48195e-11	123.618
100045066	10.5809	-6.94686	2.33772	-2.97164	NA	NA	123.371
13143	54.3154	-6.94523	1.11421	-6.23333	4.56618e-10	2.86477e-09	123.232
434197	20.2082	-6.9412	1.34691	-5.15341	2.55788e-07	1.11833e-06	122.888
107022	1192.54	-6.91741	0.566092	-12.2196	2.44378e-34	1.04909e-32	120.878
100502861	987.47	-6.91295	0.545947	-12.6623	9.56375e-37	4.84287e-35	120.505
319767	279.863	-6.90998	0.813045	-8.49889	1.91419e-17	2.54128e-16	120.257
18761	855.735	-6.88319	0.553029	-12.4463	1.46392e-35	6.88043e-34	118.045
20344	10.0858	-6.88057	1.85057	-3.71809	0.000200732	0.00056441	117.831
73893	34.0175	-6.86657	0.964091	-7.12233	1.06121e-12	8.97936e-12	116.693
14969	175.25	-6.86105	0.669555	-10.2472	1.2185e-24	2.79129e-23	116.247
66402	13.0765	-6.85168	2.00766	-3.41277	0.000643061	0.00165506	115.494
12866	196.576	-6.84492	0.662995	-10.3242	5.47473e-25	1.28104e-23	114.955
50930	50.9537	-6.82997	1.44354	-4.73142	2.22956e-06	8.55021e-06	113.77
18788	17.1832	-6.81913	1.33711	-5.09988	3.39865e-07	1.4571e-06	112.918
20657	105.625	-6.81638	0.879788	-7.74776	9.35303e-15	9.59712e-14	112.703
72287	62.8129	-6.80859	0.985342	-6.90988	4.85065e-12	3.81063e-11	112.096
381741	20.0706	-6.80608	1.10504	-6.15913	7.31472e-10	4.46084e-09	111.901
67860	2797.1	-6.7867	0.545345	-12.4448	1.49289e-35	6.99648e-34	110.408
14701	6620.96	-6.77065	0.498333	-13.5866	4.80822e-42	3.24972e-40	109.187
17060	42.321	-6.77042	0.909037	-7.4479	9.48394e-14	8.86396e-13	109.169
214944	1038.01	-6.76555	0.561197	-12.0556	1.8125e-33	7.28383e-32	108.801
100862181	35.7705	-6.76497	0.97586	-6.93231	4.14017e-12	3.27767e-11	108.757
12143	9.7282	-6.76187	1.90034	-3.55824	0.000373342	0.00100023	108.524
64383	45752.7	-6.7382	0.512051	-13.1592	1.50608e-39	8.82922e-38	106.758
18081	1085.01	-6.73641	0.544567	-12.3702	3.7887e-35	1.75051e-33	106.625
209488	46.6636	-6.73332	1.21328	-5.54967	2.86203e-08	1.42936e-07	106.397
100502774	27.0488	-6.72323	0.947135	-7.0985	1.26122e-12	1.05841e-11	105.656
100038560	68.7971	-6.71781	1.04319	-6.43967	1.19735e-10	8.03274e-10	105.26
408059	10.701	-6.71019	1.99171	-3.36906	0.000754243	0.00191619	104.706
66166	6.74569	-6.70068	1.54323	-4.34199	1.41199e-05	4.79637e-05	104.017
80859	2744.62	-6.69907	0.951078	-7.04366	1.87258e-12	1.53523e-11	103.901
78449	180.885	-6.69114	0.725737	-9.21978	2.97701e-20	5.10398e-19	103.332
16186	180.742	-6.68885	0.901038	-7.4235	1.14066e-13	1.05943e-12	103.168
20519	27.8012	-6.678	1.41912	-4.70573	2.52958e-06	9.63077e-06	102.395
20715	26.1108	-6.67621	1.06644	-6.26028	3.84282e-10	2.4324e-09	102.268
109198	94.6588	-6.67428	0.814551	-8.19381	2.53079e-16	3.04365e-15	102.131
17079	53.6005	-6.67192	1.1122	-5.99884	1.98734e-09	1.15306e-08	101.964
73652	10.8135	-6.67182	1.32806	-5.02375	5.06732e-07	2.12081e-06	101.957
66895	190.933	-6.66177	0.849934	-7.83799	4.57826e-15	4.84047e-14	101.25
23959	188.07	-6.65767	1.09004	-6.10774	1.01053e-09	6.06095e-09	100.962
217698	6.28345	-6.65035	1.49804	-4.43937	9.02228e-06	3.15384e-05	100.451
26377	219.478	-6.64387	1.10913	-5.99014	2.09654e-09	1.2117e-08	100.001
69312	30.6259	-6.63409	1.49866	-4.42668	9.56928e-06	3.33082e-05	99.3256
100504102	7.76237	-6.62294	1.80419	-3.67087	0.000241723	0.000670104	98.5608
12349	1761.94	-6.60358	0.58975	-11.1973	4.20529e-29	1.31263e-27	97.2469
12045	85.3546	-6.60034	2.30069	-2.86885	0.00411968	0.00900822	97.0288
434782	93.7214	-6.57981	0.590773	-11.1376	8.22784e-29	2.52485e-27	95.6579
12518	87.6407	-6.57401	1.00381	-6.54904	5.79095e-11	4.03393e-10	95.2742
20973	753.339	-6.57231	0.71728	-9.16282	5.05585e-20	8.49881e-19	95.1615
210293	1005.04	-6.57091	0.472016	-13.9209	4.7261e-44	3.58328e-42	95.0696
75345	7.21536	-6.55154	1.7935	-3.65294	0.000259251	0.00071506	93.8017
17706	289.056	-6.54757	0.754353	-8.67971	3.96768e-18	5.64414e-17	93.5438
72058	9.10694	-6.52635	1.68562	-3.87179	0.000108039	0.000317536	92.1779
237504	28.6501	-6.52442	1.12723	-5.788	7.12289e-09	3.84283e-08	92.0548
54630	91.6722	-6.52189	0.998077	-6.53446	6.38397e-11	4.42254e-10	91.8936
270084	1010.36	-6.52029	0.457304	-14.2581	3.99172e-46	3.45442e-44	91.7915
104086	214.95	-6.51843	0.527917	-12.3474	5.02856e-35	2.28464e-33	91.6733
73303	15.3065	-6.50639	1.40132	-4.64306	3.43294e-06	1.28165e-05	90.9116
117167	21.8834	-6.49684	1.49185	-4.35488	1.33138e-05	4.53857e-05	90.3119
233806	928.063	-6.49431	0.462353	-14.0462	8.12476e-45	6.51414e-43	90.1536
108811	59.3978	-6.48728	0.816027	-7.94984	1.86757e-15	2.03369e-14	89.7151
106861	271.199	-6.47786	0.576326	-11.2399	2.59626e-29	8.15056e-28	89.1311
100503007	37.0514	-6.4774	0.76086	-8.51326	1.69112e-17	2.2598e-16	89.1029
12862	7.45407	-6.47366	1.50884	-4.29049	1.78276e-05	5.94108e-05	88.8723
208158	1788.46	-6.47059	0.527423	-12.2683	1.34014e-34	5.87652e-33	88.6836
225341	528.336	-6.46696	0.556979	-11.6108	3.63238e-31	1.28041e-29	88.4606
68480	1362.19	-6.46159	0.512735	-12.6022	2.05343e-36	1.00858e-34	88.1317
75379	38.1246	-6.45492	1.43372	-4.5022	6.72527e-06	2.39387e-05	87.7251
432488	8.98095	-6.44842	1.98904	-3.24197	0.00118708	0.00290743	87.3307
72512	96.3702	-6.44666	0.762612	-8.45339	2.82956e-17	3.70835e-16	87.2243
73914	441.173	-6.44529	0.710976	-9.0654	1.24144e-19	2.02645e-18	87.1414
263406	481.359	-6.44437	0.704331	-9.14963	5.71306e-20	9.57406e-19	87.086
77037	32.1651	-6.43753	1.75216	-3.67406	0.000238731	0.000662036	86.6743
110115	7.49733	-6.43469	1.91107	-3.36706	0.000759732	0.00192863	86.5039
227960	931.678	-6.43222	0.583297	-11.0274	2.82039e-28	8.34184e-27	86.3559
70113	22.6136	-6.4205	0.978112	-6.56417	5.23223e-11	3.66345e-10	85.657
474160	11.9929	-6.42049	1.04339	-6.15348	7.58007e-10	4.61234e-09	85.6563
12032	2636.14	-6.41021	0.738389	-8.68135	3.91093e-18	5.57205e-17	85.0485
26382	229.399	-6.40222	0.885589	-7.22934	4.8536e-13	4.24976e-12	84.5788
321019	195.762	-6.4018	0.614383	-10.4199	2.01228e-25	4.86877e-24	84.5537
109361	9.76537	-6.40101	1.84297	-3.4732	0.000514298	0.00134834	84.5077
433099	53.5602	-6.39496	0.957889	-6.6761	2.45393e-11	1.79101e-10	84.1539
70835	8.38508	-6.38369	1.44244	-4.42562	9.61649e-06	3.34654e-05	83.4993
11606	195.718	-6.38326	1.10632	-5.76983	7.93516e-09	4.23865e-08	83.4743
71670	137.019	-6.37285	0.732424	-8.70104	3.28847e-18	4.70571e-17	82.8743
214359	357.378	-6.36893	0.878419	-7.25045	4.154e-13	3.66071e-12	82.6491
12051	97.6628	-6.3556	1.13878	-5.58106	2.39062e-08	1.20422e-07	81.8893
231931	160.449	-6.35215	0.440958	-14.4053	4.78937e-47	4.2806e-45	81.6936
240168	371.913	-6.34421	0.664231	-9.55122	1.28179e-21	2.4265e-20	81.2453
233186	17.6369	-6.34009	1.38635	-4.57323	4.80267e-06	1.75028e-05	81.0136
64337	28.7157	-6.31912	1.42498	-4.43454	9.2268e-06	3.21846e-05	79.8445
69325	6.10618	-6.31658	1.81916	-3.47224	0.000516126	0.00135219	79.7042
68527	6.10397	-6.3149	1.82089	-3.46803	0.000524284	0.00137291	79.6111
207818	36.7767	-6.31459	1.11809	-5.64766	1.62644e-08	8.37594e-08	79.5943
72324	101.065	-6.30886	0.485732	-12.9884	1.42447e-38	7.84467e-37	79.2785
69386	78.4375	-6.29407	0.713135	-8.82592	1.08565e-18	1.63961e-17	78.4701
214191	14.5768	-6.28977	2.34388	-2.68349	0.00728577	0.0150729	78.2368
15001	5.95062	-6.27726	1.82644	-3.43688	0.00058846	0.00152703	77.5609
328967	610.016	-6.27597	0.657586	-9.54395	1.37492e-21	2.59679e-20	77.4915
545539	318.185	-6.27483	0.790897	-7.93381	2.12515e-15	2.30498e-14	77.4304
13732	495.344	-6.27403	0.862786	-7.27183	3.54655e-13	3.14744e-12	77.3876
53625	462.128	-6.26961	0.911852	-6.87568	6.16931e-12	4.78678e-11	77.1507
229323	24.0513	-6.26878	1.08046	-5.80196	6.55455e-09	3.55223e-08	77.1067
11475	113.237	-6.26738	0.714293	-8.77424	1.72068e-18	2.54477e-17	77.0315
100038561	25.4644	-6.26352	1.86921	-3.3509	0.000805505	0.00203819	76.8258
12892	3483.94	-6.25288	0.501656	-12.4645	1.16608e-35	5.54429e-34	76.2616
101488	309.706	-6.24797	0.516199	-12.1038	1.00822e-33	4.19604e-32	76.0023
244198	78.701	-6.24534	1.08236	-5.77013	7.921e-09	4.23461e-08	75.8637
71660	31.6531	-6.24098	0.882289	-7.07362	1.50942e-12	1.25448e-11	75.6348
73915	6.35894	-6.23589	1.55138	-4.01959	5.83005e-05	0.000179275	75.3684
100042757	57.6863	-6.22761	0.641472	-9.70831	2.77902e-22	5.44354e-21	74.937
229600	49.8563	-6.22579	0.603241	-10.3206	5.68807e-25	1.32716e-23	74.8429
56722	3306.26	-6.22375	0.319567	-19.4756	1.76914e-84	6.88953e-82	74.7369
100504640	7.30473	-6.21836	1.40198	-4.43543	9.18891e-06	3.20798e-05	74.4583
17988	1908.25	-6.21221	0.50363	-12.3349	5.8783e-35	2.64864e-33	74.1414
71223	31.5277	-6.21208	0.956336	-6.49571	8.26446e-11	5.65816e-10	74.1349
75013	10.7431	-6.20841	1.98139	-3.13337	0.00172813	0.00408694	73.9465
17705	1865.07	-6.19541	0.68442	-9.05206	1.40294e-19	2.28097e-18	73.2834
15896	99.3276	-6.18707	1.19814	-5.16391	2.4185e-07	1.06075e-06	72.8606
12257	510.962	-6.18556	0.94107	-6.5729	4.93433e-11	3.47122e-10	72.7846
75303	13.2516	-6.17764	2.34448	-2.63498	0.0084143	0.0171068	72.386
100434	4426.11	-6.17495	0.514081	-12.0116	3.08713e-33	1.22854e-31	72.2512
21817	704.846	-6.16804	0.769335	-8.01736	1.08039e-15	1.21282e-14	71.9058
71071	8.68817	-6.16522	1.55207	-3.97226	7.11926e-05	0.000216154	71.7658
58185	90.7244	-6.14749	1.05109	-5.8487	4.95419e-09	2.73475e-08	70.8889
56460	38.8862	-6.14674	0.742841	-8.27464	1.28844e-16	1.59771e-15	70.8522
71704	401.346	-6.14473	0.933551	-6.58211	4.63829e-11	3.28415e-10	70.7537
67483	11.525	-6.13607	1.46261	-4.19529	2.72522e-05	8.82473e-05	70.33
12370	188.244	-6.12414	0.762374	-8.03299	9.51253e-16	1.07673e-14	69.751
27007	7.22899	-6.11927	2.07353	-2.95113	0.00316612	0.00709774	69.5157
11482	393.958	-6.11752	0.620886	-9.85289	6.66001e-23	1.37366e-21	69.4316
52855	244.048	-6.11255	0.695847	-8.78432	1.57309e-18	2.3348e-17	69.1927
68713	42.3047	-6.10073	0.967177	-6.30777	2.83092e-10	1.82078e-09	68.628
20665	1813.67	-6.09838	0.545563	-11.1781	5.21729e-29	1.61312e-27	68.5164
18089	4.66154	-6.09271	1.6569	-3.67717	0.000235834	0.000654666	68.2479
192136	29.3635	-6.08203	1.03573	-5.87224	4.29942e-09	2.38863e-08	67.7443
606736	44.1003	-6.08032	2.31378	-2.62788	0.00859196	0.0174225	67.6641
258502	8.2971	-6.07604	2.12601	-2.85795	0.00426387	0.00929864	67.4638
231633	448.284	-6.07569	0.593046	-10.2449	1.2478e-24	2.85043e-23	67.4473
70747	5594.01	-6.0715	0.499114	-12.1645	4.80086e-34	2.03427e-32	67.2516
12522	1890.48	-6.05965	0.927958	-6.53009	6.57319e-11	4.54977e-10	66.7015
226422	156.094	-6.05568	0.522636	-11.5868	4.8076e-31	1.67661e-29	66.5181
17710	1943.88	-6.05485	0.650571	-9.30698	1.31523e-20	2.3206e-19	66.4802
15512	638.156	-6.04561	0.40469	-14.9389	1.84102e-50	2.00745e-48	66.0558
13032	382.863	-6.04021	0.973897	-6.2021	5.57137e-10	3.45172e-09	65.8087
66695	6.72711	-6.03188	1.45189	-4.15449	3.26015e-05	0.000104453	65.4298
320111	3495.73	-6.0262	0.55913	-10.7778	4.38185e-27	1.20251e-25	65.1729
17709	1358.63	-6.02563	0.685181	-8.79423	1.44038e-18	2.15149e-17	65.1473
72927	377.613	-6.02509	0.515969	-11.6772	1.6666e-31	6.00415e-30	65.1227
17761	1867.99	-6.02356	0.650687	-9.25722	2.09814e-20	3.65856e-19	65.0537
14159	1091.07	-6.01502	1.10218	-5.45737	4.83249e-08	2.33088e-07	64.6697
208990	110.61	-6.01473	0.67583	-8.89978	5.5958e-19	8.66713e-18	64.657
53320	18.5626	-6.01264	1.48822	-4.04016	5.34158e-05	0.000165248	64.5632
75373	30.1459	-6.00609	0.923808	-6.50145	7.95477e-11	5.45299e-10	64.2709
26364	2268.48	-6.00434	0.773622	-7.76134	8.40367e-15	8.65012e-14	64.1929
16439	1249.06	-6.00045	0.721363	-8.31821	8.9299e-17	1.12525e-15	64.0202
15245	480.309	-5.99111	0.600198	-9.98189	1.82946e-23	3.90636e-22	63.607
70450	457.869	-5.99024	1.03701	-5.77648	7.62774e-09	4.09315e-08	63.5687
56532	111.721	-5.99021	0.6979	-8.5832	9.22732e-18	1.25978e-16	63.5673
18584	336.681	-5.98634	0.415427	-14.4101	4.47099e-47	4.018e-45	63.3969
75104	2198.64	-5.98531	0.456162	-13.121	2.49528e-39	1.44726e-37	63.3517
777648	6.58237	-5.97975	2.04155	-2.92903	0.00340025	0.00755734	63.1081
70008	4.0146	-5.9783	1.54172	-3.87768	0.000105458	0.000311067	63.0444
66066	414.392	-5.97512	0.731517	-8.16812	3.13226e-16	3.74224e-15	62.9059
12925	304.015	-5.97241	0.880878	-6.78006	1.20126e-11	9.04593e-11	62.7877
214855	450.92	-5.97227	0.646731	-9.23455	2.59366e-20	4.47961e-19	62.7817
320435	307.891	-5.97175	0.867687	-6.88238	5.88625e-12	4.58455e-11	62.7589
56774	5.76142	-5.96957	1.81259	-3.29339	0.000989881	0.00246281	62.6642
234199	5.07293	-5.9684	1.91468	-3.11718	0.00182588	0.00429143	62.6136
67704	72.4884	-5.96206	0.822581	-7.24799	4.22995e-13	3.71963e-12	62.3389
232201	410.355	-5.95987	1.13952	-5.23016	1.69365e-07	7.59359e-07	62.2442
242608	15.0539	-5.95829	1.26896	-4.6954	2.66087e-06	1.01e-05	62.176
56213	231.091	-5.94462	0.90336	-6.58056	4.68677e-11	3.31417e-10	61.5896
654818	126.238	-5.93633	0.647222	-9.17201	4.64275e-20	7.82048e-19	61.2367
64685	91.6052	-5.9327	0.620307	-9.56413	1.13147e-21	2.14941e-20	61.0829
11670	9.5763	-5.93055	1.37785	-4.30422	1.67578e-05	5.6097e-05	60.9922
66905	1089.59	-5.92028	0.524158	-11.2948	1.39151e-29	4.42791e-28	60.5595
14555	2970.95	-5.91552	0.592107	-9.99063	1.67512e-23	3.58148e-22	60.36
18605	179.341	-5.91458	0.683773	-8.64991	5.1539e-18	7.23581e-17	60.3205
278679	10.6013	-5.91371	2.34609	-2.52066	0.0117135	0.0230549	60.2841
74519	122.432	-5.9116	0.650636	-9.08589	1.02855e-19	1.69245e-18	60.1963
69550	95.3152	-5.90941	0.641291	-9.21487	3.1165e-20	5.33754e-19	60.1049
66925	15.7576	-5.90644	0.92341	-6.39634	1.59145e-10	1.05128e-09	59.9814
319236	33.7707	-5.89978	1.22758	-4.80603	1.53958e-06	6.02571e-06	59.7049
12142	89.1439	-5.89613	0.827124	-7.12847	1.01494e-12	8.61012e-12	59.554
16601	247.672	-5.89168	0.509107	-11.5726	5.6752e-31	1.97078e-29	59.3706
319887	21.6078	-5.88356	0.788171	-7.46482	8.34135e-14	7.84989e-13	59.0373
14129	55.4978	-5.87911	0.751533	-7.82282	5.16536e-15	5.4331e-14	58.8555
12628	190.054	-5.87234	0.947956	-6.19474	5.83817e-10	3.60881e-09	58.5803
68458	1299.98	-5.87097	0.658348	-8.91774	4.75917e-19	7.41343e-18	58.5247
78829	4130.6	-5.87053	0.342999	-17.1153	1.14123e-65	2.01632e-63	58.5067
68743	1393.86	-5.85683	0.557688	-10.502	8.45795e-26	2.14478e-24	57.9538
286942	439.233	-5.8549	0.707203	-8.27895	1.24268e-16	1.54564e-15	57.8763
107321	141.566	-5.84678	0.959606	-6.0929	1.10886e-09	6.624e-09	57.5513
192657	787.506	-5.84362	0.526996	-11.0885	1.42592e-28	4.31897e-27	57.4254
110595	392.578	-5.84262	0.717243	-8.14594	3.7635e-16	4.45734e-15	57.3857
330660	23.0981	-5.84254	1.12612	-5.18822	2.12316e-07	9.40839e-07	57.3824
214854	497.407	-5.8391	0.92242	-6.3302	2.44837e-10	1.58722e-09	57.2461
20681	785.968	-5.81529	0.471313	-12.3385	5.62033e-35	2.5394e-33	56.3087
68774	12.3256	-5.81473	1.43596	-4.04937	5.13566e-05	0.000159421	56.2868
16477	5304.21	-5.81342	0.707534	-8.21646	2.09607e-16	2.54705e-15	56.236
21934	139.239	-5.81236	0.667445	-8.70838	3.08256e-18	4.42655e-17	56.1947
67866	35.6653	-5.81187	1.38211	-4.20506	2.61012e-05	8.47551e-05	56.1754
403180	5.1093	-5.80902	1.61731	-3.59177	0.000328438	0.000888952	56.0647
50915	1922.44	-5.80592	0.560725	-10.3543	4.00026e-25	9.48234e-24	55.9445
319854	4.37772	-5.80458	1.90991	-3.03919	0.00237215	0.00545311	55.8925
13195	474.107	-5.80271	0.690612	-8.40228	4.37892e-17	5.67525e-16	55.8201
19214	15.77	-5.80176	0.920625	-6.30197	2.93877e-10	1.88496e-09	55.7831
17086	6.85582	-5.80056	2.14461	-2.70471	0.00683636	0.0142259	55.7368
14132	454.337	-5.79706	0.899804	-6.44258	1.17458e-10	7.89381e-10	55.6018
14276	33.3244	-5.79354	1.28713	-4.50113	6.75936e-06	2.40444e-05	55.4663
270157	32.3419	-5.79067	1.88937	-3.06487	0.00217762	0.00504134	55.356
15212	1991.04	-5.78799	0.688342	-8.4086	4.14931e-17	5.39047e-16	55.2534
56429	18.236	-5.77566	1.06545	-5.42085	5.93172e-08	2.83103e-07	54.7832
12496	51.7874	-5.7722	0.831627	-6.94085	3.89751e-12	3.09305e-11	54.6519
20389	26.3029	-5.76628	1.06059	-5.43688	5.42227e-08	2.6046e-07	54.4281
14815	785.057	-5.76456	0.541786	-10.6399	1.94309e-26	5.1095e-25	54.3632
227612	272.963	-5.75933	0.85417	-6.7426	1.55578e-11	1.16141e-10	54.1664
71138	4.729	-5.75636	2.00599	-2.86958	0.00411021	0.00898871	54.055
218121	148.708	-5.75438	0.474887	-12.1174	8.54643e-34	3.58424e-32	53.9809
15267	39.3147	-5.75373	0.989288	-5.81603	6.02609e-09	3.28229e-08	53.9568
225608	251.004	-5.74983	0.622697	-9.23375	2.61328e-20	4.50873e-19	53.8109
11513	644.985	-5.74716	0.880129	-6.5299	6.58116e-11	4.55336e-10	53.7114
13524	19.5175	-5.74534	1.88757	-3.04378	0.00233629	0.00537899	53.6438
11522	65.2326	-5.73884	1.26167	-4.5486	5.40043e-06	1.95117e-05	53.4028
11828	29.374	-5.73857	2.32328	-2.47003	0.0135103	0.0261817	53.3928
11468	66.0875	-5.73259	0.804941	-7.12175	1.06563e-12	9.01211e-12	53.1718
104445	532.49	-5.72911	0.564225	-10.154	3.18203e-24	7.10187e-23	53.0438
76408	103.791	-5.72427	0.910888	-6.28427	3.29394e-10	2.09796e-09	52.866
225908	1274.81	-5.72137	0.452443	-12.6455	1.18448e-36	5.94276e-35	52.7599
228993	120.407	-5.72003	0.96057	-5.95482	2.60351e-09	1.48476e-08	52.7109
110557	58.3866	-5.71817	0.828193	-6.90439	5.04181e-12	3.9551e-11	52.6432
319188	10.2914	-5.71778	1.2011	-4.76047	1.93142e-06	7.46463e-06	52.6287
20963	1011.37	-5.71222	1.00217	-5.69985	1.19912e-08	6.27611e-08	52.4262
13799	23.464	-5.70835	0.973305	-5.86491	4.49363e-09	2.49314e-08	52.286
21425	597.057	-5.70007	0.401718	-14.1892	1.06828e-45	8.91471e-44	51.9867
114679	1551.19	-5.69638	0.737094	-7.72816	1.09116e-14	1.11266e-13	51.8537
66167	251.319	-5.69628	0.587482	-9.6961	3.13244e-22	6.09932e-21	51.8505
16534	30.5777	-5.69137	0.732112	-7.77392	7.60966e-15	7.85755e-14	51.6742
71149	26.8159	-5.6904	1.14991	-4.94856	7.47657e-07	3.0764e-06	51.6395
108995	352.587	-5.68884	0.668836	-8.50559	1.80682e-17	2.40263e-16	51.5837
319156	77.3899	-5.68881	0.989595	-5.74863	8.99721e-09	4.77322e-08	51.5825
12156	198.496	-5.68807	0.710196	-8.00914	1.1551e-15	1.29225e-14	51.5559
100503907	21.4591	-5.68581	1.86071	-3.05573	0.00224517	0.00518525	51.4753
80287	96.2124	-5.68346	0.755711	-7.52068	5.44905e-14	5.23954e-13	51.3916
215748	662.076	-5.68103	0.526221	-10.7959	3.59958e-27	9.89491e-26	51.305
94226	1262.9	-5.68041	0.403633	-14.0732	5.54911e-45	4.49313e-43	51.2831
54354	1012.74	-5.67952	0.883286	-6.42999	1.27615e-10	8.53339e-10	51.2513
19201	242.17	-5.67094	0.787741	-7.19899	6.0659e-13	5.28859e-12	50.9476
20296	33.3016	-5.67063	1.34077	-4.22939	2.34324e-05	7.66826e-05	50.9365
20849	91.9813	-5.66832	1.45257	-3.90226	9.52985e-05	0.000283194	50.8549
73989	56.6484	-5.66824	0.928292	-6.10609	1.02102e-09	6.11491e-09	50.8521
100503392	128.65	-5.66465	1.07619	-5.26361	1.41253e-07	6.40338e-07	50.7258
69146	392.197	-5.65927	0.864758	-6.54435	5.97563e-11	4.15373e-10	50.5372
23844	4.55163	-5.65912	1.79097	-3.1598	0.00157878	0.00376201	50.5319
68792	32.8212	-5.64847	1.2669	-4.4585	8.25351e-06	2.90373e-05	50.1601
100042503	11.7573	-5.64466	1.04843	-5.38393	7.28761e-08	3.43604e-07	50.0279
109731	124.714	-5.64429	0.643012	-8.77789	1.66573e-18	2.46781e-17	50.0149
21835	43.1599	-5.64418	0.865493	-6.52135	6.96777e-11	4.81067e-10	50.0113
20249	6137.8	-5.64246	0.609689	-9.25467	2.14899e-20	3.74323e-19	49.9518
319192	8.5234	-5.64245	1.22651	-4.6004	4.21686e-06	1.55305e-05	49.9511
67765	24.7704	-5.63818	1.4842	-3.79879	0.000145402	0.000418401	49.8038
226359	28.7303	-5.63114	1.18449	-4.75406	1.99376e-06	7.69103e-06	49.5613
236643	9.06697	-5.63068	1.2194	-4.61756	3.88272e-06	1.43743e-05	49.5453
75434	3.91621	-5.63002	1.94385	-2.89633	0.00377557	0.00831693	49.5229
20130	337.407	-5.62404	0.338686	-16.6055	6.36156e-62	1.00048e-59	49.3181
100041655	26.2981	-5.62002	1.19539	-4.7014	2.58384e-06	9.8305e-06	49.1807
329093	6.32639	-5.61961	1.69708	-3.31135	NA	NA	49.1666
11747	2994.78	-5.61497	0.675657	-8.31038	9.53999e-17	1.19935e-15	49.0087
23890	102.434	-5.61325	0.948106	-5.92049	3.20987e-09	1.81474e-08	48.9504
14991	43.7246	-5.60856	1.16335	-4.82104	1.42814e-06	5.60969e-06	48.7914
109552	4581.3	-5.60592	0.30545	-18.353	3.12399e-75	9.82616e-73	48.7023
70274	68.8332	-5.60493	0.88283	-6.34882	2.16975e-10	1.41445e-09	48.669
215418	508.727	-5.5999	0.721264	-7.764	8.22887e-15	8.48622e-14	48.4995
20410	668.488	-5.59988	0.595406	-9.40516	5.19525e-21	9.48366e-20	48.499
234395	185.577	-5.59746	0.890249	-6.28752	3.22576e-10	2.05776e-09	48.4177
19296	118.389	-5.59729	0.725763	-7.71228	1.23588e-14	1.25164e-13	48.4119
17180	4.03997	-5.57875	1.63734	-3.4072	0.000656327	0.00168655	47.7936
16651	548.026	-5.57008	0.637699	-8.73465	2.44412e-18	3.54083e-17	47.5074
319626	101.972	-5.56925	0.567009	-9.82217	9.03762e-23	1.84774e-21	47.4802
17001	17.9674	-5.56187	1.25728	-4.42374	9.70048e-06	3.37294e-05	47.2377
22038	333.168	-5.56006	0.965377	-5.75947	8.43774e-09	4.48659e-08	47.1786
30943	5.20225	-5.55927	2.10069	-2.6464	0.00813541	0.0166095	47.1528
100862012	367.279	-5.55533	0.532286	-10.4367	1.685e-25	4.12573e-24	47.0242
74230	9.33897	-5.55412	1.3147	-4.22464	2.39323e-05	7.82247e-05	46.9847
17480	30.4605	-5.55279	1.16783	-4.75479	1.98653e-06	7.66676e-06	46.9414
73617	3.80115	-5.55195	1.72231	-3.22354	0.00126615	0.00308355	46.9141
17087	25.939	-5.54549	1.33828	-4.14373	3.41695e-05	0.00010907	46.7046
382111	69.0362	-5.53673	0.813623	-6.80503	1.01028e-11	7.65007e-11	46.4216
106878	255.07	-5.52952	0.569136	-9.71565	2.586e-22	5.09599e-21	46.1904
59125	906.463	-5.5261	0.422355	-13.084	4.06346e-39	2.32385e-37	46.0809
109857	28.0018	-5.5044	0.967954	-5.68664	1.29564e-08	6.74459e-08	45.3932
16362	393.667	-5.50205	0.770174	-7.1439	9.07202e-13	7.74841e-12	45.319
77647	7.31365	-5.50113	1.73464	-3.17135	0.00151734	0.00362512	45.2904
108101	1081.08	-5.49688	0.95859	-5.73434	9.78947e-09	5.18176e-08	45.1569
72203	229.882	-5.49365	0.586346	-9.36929	7.30238e-21	1.31975e-19	45.056
20362	7889.21	-5.48738	0.563709	-9.73441	2.15053e-22	4.27388e-21	44.8606
14825	23.2208	-5.48481	1.27765	-4.2929	1.76354e-05	5.88184e-05	44.7808
21391	143.883	-5.4818	1.13597	-4.82563	1.39561e-06	5.49507e-06	44.6874
544817	292.679	-5.48095	0.882633	-6.20978	5.30604e-10	3.30612e-09	44.6612
70110	92.6987	-5.47719	0.93986	-5.82767	5.62077e-09	3.07367e-08	44.5449
110168	46.2508	-5.47666	0.93927	-5.83076	5.5176e-09	3.02331e-08	44.5285
13038	419.606	-5.46854	0.541174	-10.1049	5.25247e-24	1.16094e-22	44.2786
317757	6.59874	-5.46183	1.4416	-3.78874	0.000151416	0.000434942	44.0732
68024	481.684	-5.4609	0.57398	-9.5141	1.83296e-21	3.4302e-20	44.0449
70827	13509.8	-5.45877	0.525447	-10.3888	2.78782e-25	6.65657e-24	43.9798
13507	3.35737	-5.45403	1.82896	-2.98203	0.00286344	0.00648587	43.8354
320635	3.53432	-5.45094	1.98675	-2.74364	0.00607614	0.0127789	43.7417
193740	516.582	-5.44416	0.55457	-9.8169	9.52297e-23	1.94212e-21	43.5367
18606	7898.5	-5.43976	0.509158	-10.6838	1.2116e-26	3.21182e-25	43.4041
12494	65.059	-5.43917	0.904069	-6.01632	1.78431e-09	1.04118e-08	43.3863
20672	50.2416	-5.43652	0.935338	-5.81235	6.16007e-09	3.34842e-08	43.3066
668591	3.53505	-5.43259	1.99951	-2.71696	0.00658846	0.0137643	43.189
68957	40.1871	-5.42527	1.08204	-5.01393	5.33303e-07	2.22632e-06	42.9703
108151	199.842	-5.42386	0.968024	-5.60302	2.10649e-08	1.07199e-07	42.9282
21929	1521.87	-5.42204	0.870016	-6.23211	4.6018e-10	2.88601e-09	42.8742
18824	212.7	-5.40187	0.919311	-5.876	4.20299e-09	2.33744e-08	42.2791
65221	112.745	-5.40127	1.09309	-4.94128	7.76109e-07	3.18239e-06	42.2616
100504728	3.49709	-5.39966	2.01373	-2.68142	0.00733094	0.0151548	42.2142
68790	15.9698	-5.39788	1.49918	-3.60055	0.000317541	0.000861309	42.1622
21985	3466.15	-5.39629	0.367026	-14.7027	6.19095e-49	6.13692e-47	42.1158
212980	277.019	-5.39127	0.639423	-8.43145	3.41405e-17	4.45652e-16	41.9694
192678	560.723	-5.38302	0.942407	-5.71199	1.11662e-08	5.86869e-08	41.7302
100504051	22.3617	-5.37587	1.06714	-5.03763	4.7134e-07	1.97977e-06	41.5239
170755	307.926	-5.37543	0.724306	-7.42149	1.15809e-13	1.07379e-12	41.5113
230073	162.016	-5.36864	0.91871	-5.84368	5.10611e-09	2.81576e-08	41.3164
21416	538.875	-5.36438	0.589561	-9.09894	9.12194e-20	1.50706e-18	41.1945
15446	298.499	-5.36425	1.06057	-5.05789	4.23928e-07	1.78982e-06	41.1907
77675	11.2157	-5.36396	1.30137	-4.12179	3.75947e-05	0.000119207	41.1826
71918	2001.58	-5.35768	0.520489	-10.2936	7.53408e-25	1.7405e-23	41.0038
594843	3.50356	-5.35606	1.6829	-3.18263	0.00145945	0.00350114	40.9576
230766	14.7816	-5.35353	2.22336	-2.40785	0.0160467	0.0305045	40.8859
100861760	6.62581	-5.34922	2.35076	-2.27553	0.0228741	0.0418583	40.7639
73456	18.7689	-5.34635	1.6125	-3.31556	0.000914606	0.0022898	40.6829
108735	656.834	-5.34574	0.638647	-8.37043	5.74107e-17	7.37056e-16	40.6658
54325	1647.76	-5.34309	0.301959	-17.6947	4.60353e-70	1.10729e-67	40.5911
319181	30.4503	-5.34118	0.762434	-7.00543	2.46231e-12	1.9977e-11	40.5372
217333	47.3018	-5.33562	0.803928	-6.63693	3.20273e-11	2.3097e-10	40.3813
20408	5247.66	-5.33018	0.50064	-10.6467	1.80604e-26	4.75677e-25	40.2294
207742	26.076	-5.33016	1.12767	-4.7267	2.28194e-06	8.7388e-06	40.2289
71301	3.45723	-5.32872	1.76954	-3.01135	0.00260085	0.00593714	40.1888
100628611	2.82286	-5.32699	1.66586	-3.19774	0.0013851	0.00333993	40.1406
75465	19.5323	-5.32406	0.725971	-7.33372	2.23857e-13	2.02736e-12	40.0592
78917	25.5326	-5.32344	0.71208	-7.4759	7.66756e-14	7.26597e-13	40.0419
100503460	11.8169	-5.32041	1.32905	-4.00316	6.25032e-05	0.000191192	39.958
229320	65.8151	-5.31752	0.877589	-6.05924	1.36764e-09	8.10769e-09	39.8781
18985	6.88131	-5.31472	1.70559	-3.11606	0.00183285	0.00430719	39.8007
170716	136.271	-5.31452	0.420973	-12.6244	1.54978e-36	7.72809e-35	39.7951
29810	403.432	-5.31438	0.646605	-8.2189	2.05371e-16	2.49743e-15	39.7913
432611	203.529	-5.30084	0.539871	-9.81873	9.35187e-23	1.9096e-21	39.4197
100038882	87.0692	-5.29699	0.887112	-5.97105	2.35732e-09	1.35333e-08	39.3146
628919	4.55876	-5.29254	1.86919	-2.83145	0.00463369	0.0100276	39.1933
11602	12.2902	-5.29124	1.67894	-3.15153	0.00162416	0.00386059	39.1583
12502	3.22321	-5.29122	2.02834	-2.60865	0.00909004	0.018337	39.1575
109905	1890.56	-5.28775	0.391288	-13.5137	1.29846e-41	8.66841e-40	39.0636
223267	117.285	-5.28652	0.581223	-9.09552	9.41363e-20	1.55368e-18	39.0302
14782	2601.59	-5.28275	0.637354	-8.28857	1.14619e-16	1.43327e-15	38.9284
18024	895.266	-5.27914	0.630863	-8.36813	5.85408e-17	7.49799e-16	38.8312
239759	42.2333	-5.27706	0.90868	-5.80739	6.34548e-09	3.44577e-08	38.775
16691	16.736	-5.27644	1.23852	-4.26028	2.04172e-05	6.75044e-05	38.7584
16164	191.227	-5.27574	0.914323	-5.7701	7.92241e-09	4.23461e-08	38.7396
27083	4.70296	-5.27228	1.69054	-3.1187	0.00181651	0.00427248	38.6469
52150	53.1614	-5.27191	1.18159	-4.46172	8.13036e-06	2.86225e-05	38.6371
105501	6043.86	-5.26247	0.51984	-10.1233	4.35688e-24	9.66908e-23	38.385
74645	88.6982	-5.25578	1.02318	-5.13671	2.79584e-07	1.2149e-06	38.2075
12394	212.583	-5.25176	0.992156	-5.29328	1.20139e-07	5.49496e-07	38.1011
20229	1098.77	-5.2514	0.63779	-8.23373	1.81466e-16	2.21994e-15	38.0915
70423	1473.02	-5.24966	0.437411	-12.0017	3.48213e-33	1.37569e-31	38.0457
72948	6969.5	-5.24437	0.522411	-10.0388	1.02943e-23	2.22128e-22	37.9064
66528	87.3798	-5.23869	1.00338	-5.22104	1.7792e-07	7.95535e-07	37.7573
385354	24.7696	-5.2345	1.2508	-4.18493	2.8526e-05	9.21713e-05	37.648
105559	1525.24	-5.23182	0.45261	-11.5592	6.63092e-31	2.28809e-29	37.5781
329416	63.3169	-5.23021	0.423216	-12.3583	4.396e-35	2.01403e-33	37.5362
668041	18.765	-5.22779	0.805206	-6.49249	8.44296e-11	5.77795e-10	37.4733
13822	5095.27	-5.22778	0.411348	-12.7089	5.27746e-37	2.68904e-35	37.4731
17698	5337.81	-5.22556	0.716523	-7.29294	3.03264e-13	2.70668e-12	37.4154
77798	42.8834	-5.2227	0.939767	-5.55745	2.73746e-08	1.37049e-07	37.3414
378472	9.6831	-5.21904	1.01997	-5.11686	3.10665e-07	1.33999e-06	37.2466
218581	271.807	-5.21277	0.698814	-7.45946	8.68749e-14	8.14751e-13	37.0853
233335	2307.48	-5.20281	0.762454	-6.82376	8.86875e-12	6.75943e-11	36.8299
21813	408.773	-5.19518	0.806128	-6.44461	1.15895e-10	7.80719e-10	36.6358
12487	16.2892	-5.19413	1.50129	-3.45977	0.000540639	0.00141257	36.6091
211027	3.03558	-5.19109	2.04731	-2.53556	0.0112266	0.0221713	36.5319
57429	19.2576	-5.18887	1.61286	-3.21718	0.00129457	0.00314622	36.4758
71724	6.94788	-5.18705	1.46074	-3.55096	0.000383827	0.00102664	36.4298
320664	50.9969	-5.17698	0.899147	-5.75766	8.52885e-09	4.53357e-08	36.1766
57814	95.1154	-5.17654	1.00794	-5.13575	2.81014e-07	1.22014e-06	36.1653
19309	300.575	-5.17546	0.690609	-7.49405	6.678e-14	6.36511e-13	36.1383
227620	132.714	-5.16405	0.755133	-6.83859	7.99772e-12	6.10979e-11	35.8536
211550	120.655	-5.15907	1.10231	-4.68024	2.86535e-06	1.0816e-05	35.7301
320718	4.76139	-5.15831	1.72093	-2.9974	0.00272296	0.0061977	35.7112
73046	33.4649	-5.15747	0.831282	-6.20424	5.49619e-10	3.40902e-09	35.6905
100040018	8.0784	-5.15414	1.14241	-4.51164	6.43268e-06	2.29472e-05	35.6082
73376	2.91652	-5.14155	2.05366	-2.5036	0.0122937	0.0240674	35.2987
100045792	26.0613	-5.1406	1.62326	-3.16683	0.00154113	0.00367927	35.2756
30878	190.892	-5.13484	0.40002	-12.8365	1.02464e-37	5.40611e-36	35.135
432396	46.3566	-5.12983	0.906197	-5.66084	1.50636e-08	7.8018e-08	35.0134
18703	3.26518	-5.12831	1.83799	-2.79017	0.00526811	0.0112502	34.9764
50913	685.57	-5.12556	0.483457	-10.6019	2.91994e-26	7.59278e-25	34.9099
22165	9.86399	-5.12009	1.69325	-3.02383	0.00249595	0.00571841	34.7777
214685	572.596	-5.11906	0.491768	-10.4095	2.24395e-25	5.40531e-24	34.7529
237754	4.62768	-5.11141	1.72231	-2.96777	0.00299965	0.00676254	34.5692
67528	99.1028	-5.11012	0.615845	-8.29773	1.06122e-16	1.32904e-15	34.5381
107769	252.466	-5.10275	0.942211	-5.41572	6.10414e-08	2.91077e-07	34.3623
56534	2.92093	-5.10249	2.07758	-2.45598	0.01405	0.0270865	34.3561
77552	4218.97	-5.09818	0.563677	-9.04449	1.50362e-19	2.43016e-18	34.2534
56504	119.755	-5.08699	0.525678	-9.67701	3.77607e-22	7.3177e-21	33.9888
19267	1270.54	-5.08471	0.641185	-7.93018	2.18829e-15	2.36874e-14	33.9352
14699	5.30064	-5.07564	2.35375	-2.15641	0.0310518	0.0549123	33.7224
22319	1948.22	-5.07051	0.413325	-12.2676	1.35192e-34	5.91229e-33	33.6028
208154	29.6829	-5.06962	1.34333	-3.77392	0.000160702	0.000459278	33.5821
17874	721.241	-5.06472	0.739174	-6.85186	7.28979e-12	5.59511e-11	33.4681
14528	157.397	-5.06398	0.932485	-5.43063	5.61552e-08	2.68953e-07	33.4511
76927	78.9675	-5.06381	0.728062	-6.9552	3.52071e-12	2.81588e-11	33.4472
75022	2.76612	-5.06306	2.0658	-2.4509	0.01425	0.0274244	33.4298
242523	41.4366	-5.06072	0.961662	-5.26247	1.42132e-07	6.43788e-07	33.3755
50708	305.405	-5.05351	0.544491	-9.28116	1.6764e-20	2.94514e-19	33.2092
16517	31.6269	-5.0535	1.23914	-4.07822	4.53822e-05	0.000142198	33.2088
16431	673.27	-5.04938	0.663274	-7.61281	2.68194e-14	2.64251e-13	33.1142
12741	345.049	-5.04825	1.1372	-4.43918	9.03016e-06	3.15592e-05	33.0883
76113	44.2862	-5.04782	0.831764	-6.06881	1.28863e-09	7.65316e-09	33.0784
12669	24.3749	-5.0473	1.29565	-3.89557	9.79688e-05	0.000290654	33.0666
270091	67.9475	-5.04538	1.2372	-4.07807	4.54118e-05	0.000142263	33.0225
70843	10.5704	-5.0349	1.30101	-3.86998	0.000108843	0.000319669	32.7835
55951	1161.12	-5.02305	0.49994	-10.0473	9.44177e-24	2.04542e-22	32.5153
22033	33.8379	-5.02183	0.841171	-5.97005	2.37179e-09	1.3602e-08	32.488
60533	213.142	-5.02087	0.812732	-6.17776	6.5017e-10	3.99631e-09	32.4662
21810	518.271	-5.01927	0.838067	-5.9891	2.11006e-09	1.21908e-08	32.4303
57765	103.426	-5.01618	0.86773	-5.78081	7.43434e-09	3.99462e-08	32.3609
21916	74.6208	-5.01603	0.864511	-5.80217	6.54633e-09	3.54895e-08	32.3576
18611	24172.2	-5.01313	0.568304	-8.82121	1.13227e-18	1.70686e-17	32.2925
24110	26.2622	-5.00862	1.22674	-4.08288	4.44809e-05	0.000139829	32.1917
319183	26.8141	-5.00672	0.63571	-7.8758	3.38571e-15	3.61467e-14	32.1495
23831	195.558	-5.00663	0.6282	-7.96981	1.58916e-15	1.74211e-14	32.1475
94094	12.5688	-5.00378	1.8982	-2.63607	0.00838733	0.0170626	32.084
13007	2570.35	-5.00155	0.472904	-10.5762	3.84046e-26	9.93902e-25	32.0344
320769	3.70524	-4.9901	1.43548	-3.47625	0.000508482	0.00133474	31.7811
18126	21.8337	-4.98836	1.01864	-4.89707	9.7276e-07	3.9256e-06	31.7428
16456	139.595	-4.98812	0.595982	-8.36958	5.78244e-17	7.41204e-16	31.7375
243771	153.772	-4.98638	0.406287	-12.2731	1.26394e-34	5.55726e-33	31.6993
620695	346.242	-4.98607	0.51091	-9.75918	1.68506e-22	3.37755e-21	31.6925
98752	2.65147	-4.98224	2.0913	-2.38236	0.017202	0.0324329	31.6085
100503181	6.29888	-4.97903	1.06465	-4.67669	2.91538e-06	1.09972e-05	31.5381
12894	1080.15	-4.97176	0.453091	-10.973	5.15409e-28	1.48678e-26	31.3797
15944	100.167	-4.96931	0.890199	-5.58225	2.37428e-08	1.19746e-07	31.3265
68214	38.6312	-4.96282	0.845602	-5.86898	4.38472e-09	2.43354e-08	31.1859
94227	11.6628	-4.96074	1.5234	-3.25635	0.00112854	0.00277778	31.141
67457	1632.56	-4.95795	0.370907	-13.3671	9.41577e-41	5.94611e-39	31.0807
213649	98.9413	-4.94825	0.835197	-5.92465	3.1296e-09	1.77305e-08	30.8726
170790	177.739	-4.946	0.576163	-8.58438	9.1328e-18	1.24896e-16	30.8244
18477	4017.66	-4.94304	0.517978	-9.54295	1.3883e-21	2.61904e-20	30.7612
244237	17.5133	-4.93784	1.68511	-2.93027	0.00338665	0.00752916	30.6505
23829	260.22	-4.93761	0.993215	-4.97134	6.64915e-07	2.74838e-06	30.6456
78896	47.4542	-4.93292	0.741379	-6.65371	NA	NA	30.5462
70503	10.4919	-4.93265	1.38994	-3.54883	0.000386953	0.00103398	30.5404
223843	69.9872	-4.93126	0.782685	-6.30044	2.96799e-10	1.90072e-09	30.511
630499	87.2262	-4.93004	1.00908	-4.88569	1.03066e-06	4.1419e-06	30.4853
17082	2.76097	-4.9288	2.15886	-2.28305	0.0224272	0.0411278	30.459
100503311	6.86303	-4.91271	1.12039	-4.38482	1.16082e-05	3.98537e-05	30.1213
100504309	106.343	-4.90868	0.64122	-7.65522	1.92981e-14	1.91879e-13	30.0373
100038636	5.97668	-4.90769	1.75133	-2.80227	0.0050745	0.0108793	30.0167
56489	118.994	-4.9058	0.886295	-5.53517	3.10926e-08	1.54528e-07	29.9772
13852	1953.13	-4.90158	0.418511	-11.7119	1.10725e-31	4.04243e-30	29.8897
319638	88.0029	-4.89673	0.928981	-5.27107	1.35628e-07	6.16546e-07	29.7894
100503868	20.147	-4.89397	1.10217	-4.44031	8.98314e-06	3.14218e-05	29.7326
619547	9.28513	-4.89235	1.0476	-4.67004	3.01135e-06	1.13331e-05	29.6991
100316693	9.49397	-4.8919	1.10421	-4.43021	9.41421e-06	3.28103e-05	29.6898
12633	448.879	-4.89043	0.3968	-12.3246	6.67338e-35	2.99862e-33	29.6596
74558	2.49371	-4.88631	2.11789	-2.30716	0.021046	0.0388213	29.5751
14758	31412.2	-4.88465	0.566702	-8.61943	6.7287e-18	9.32666e-17	29.5411
20975	395.829	-4.8743	0.678031	-7.1889	6.53157e-13	5.66439e-12	29.3298
12745	955.2	-4.87369	0.599281	-8.13258	4.20259e-16	4.94515e-15	29.3176
75744	1964.48	-4.87214	0.48859	-9.97184	2.02449e-23	4.30034e-22	29.286
228852	2112.96	-4.86782	0.443254	-10.982	4.66417e-28	1.35261e-26	29.1984
73667	38.3658	-4.86747	0.709694	-6.85854	6.95663e-12	5.36458e-11	29.1913
100628584	905.293	-4.86448	0.488329	-9.96148	2.2469e-23	4.7481e-22	29.1309
18034	254.147	-4.85657	0.880471	-5.51588	3.47047e-08	1.70973e-07	28.9717
18295	5.81523	-4.85614	1.09319	-4.44215	8.90636e-06	3.11666e-05	28.9629
17342	123.956	-4.85413	0.489775	-9.91095	3.73089e-23	7.80338e-22	28.9228
14284	475.547	-4.85245	0.916287	-5.29578	1.1851e-07	5.42802e-07	28.8891
70789	2.84573	-4.84992	2.22011	-2.18454	0.0289228	0.0515486	28.8385
20912	455.546	-4.84771	0.336365	-14.412	4.34665e-47	3.92783e-45	28.7943
78558	163.926	-4.84598	0.770164	-6.29214	3.13119e-10	2.00053e-09	28.7598
320106	11.3014	-4.84463	1.60105	-3.02591	0.0024789	0.00568253	28.7328
360198	10.0962	-4.83821	1.79987	-2.68809	0.00718615	0.0148837	28.6053
105841	207.276	-4.83334	0.95159	-5.07923	3.78965e-07	1.61038e-06	28.509
100502834	18.1727	-4.83295	0.985183	-4.90564	9.31237e-07	3.77013e-06	28.5012
100038730	6.77272	-4.83111	1.30982	-3.68837	0.000225692	0.000628754	28.4648
18768	15.4531	-4.82879	1.13783	-4.24385	2.19715e-05	7.22345e-05	28.4192
114644	46.9813	-4.82402	0.721426	-6.68678	2.28136e-11	1.66878e-10	28.3253
272714	24.2673	-4.82307	0.859242	-5.61317	1.98657e-08	1.01475e-07	28.3066
72215	52.8597	-4.81894	0.90837	-5.30504	1.12646e-07	5.18265e-07	28.2258
71956	57.3156	-4.81339	0.945424	-5.09126	3.557e-07	1.51902e-06	28.1174
233752	599.16	-4.80532	0.537656	-8.93753	3.97979e-19	6.22308e-18	27.9604
213956	8.44879	-4.80396	1.12602	-4.26633	1.98717e-05	6.58337e-05	27.9341
100502992	3.3884	-4.80256	1.49823	-3.20548	0.00134839	0.00326344	27.907
652925	137.019	-4.79726	0.499316	-9.60766	7.42165e-22	1.41809e-20	27.8048
57757	2.73035	-4.79695	2.22669	-2.1543	0.0312169	0.0551743	27.7987
18595	684.401	-4.79662	0.573488	-8.36394	6.06603e-17	7.75125e-16	27.7923
80290	277.363	-4.79532	0.726491	-6.60065	4.09345e-11	2.92114e-10	27.7673
13731	75.4503	-4.79232	0.670154	-7.15106	8.61095e-13	7.38933e-12	27.7096
74032	88.5935	-4.79128	0.621262	-7.71218	1.23689e-14	1.25189e-13	27.6898
89867	36.7831	-4.79117	0.769036	-6.23011	4.66119e-10	2.92101e-09	27.6877
13685	226.076	-4.78863	0.932885	-5.13314	2.84943e-07	1.23654e-06	27.639
68813	515.907	-4.78594	0.984151	-4.86302	1.15611e-06	4.59633e-06	27.5875
100044193	23.028	-4.78247	0.975486	-4.90265	9.45506e-07	3.82316e-06	27.5212
67338	723.109	-4.78223	0.318832	-14.9992	7.43157e-51	8.32539e-49	27.5165
69537	72.794	-4.78065	0.924607	-5.17047	2.33508e-07	1.02641e-06	27.4865
21897	9.27101	-4.7786	1.11173	-4.29836	1.72063e-05	5.75397e-05	27.4475
12380	349.942	-4.77499	0.999436	-4.77769	1.77324e-06	6.89073e-06	27.3789
71336	83.5347	-4.76617	0.461676	-10.3236	5.51016e-25	1.28749e-23	27.212
72536	108.698	-4.7597	0.973634	-4.88859	1.01559e-06	4.09038e-06	27.0902
338367	545.968	-4.7546	0.531889	-8.93908	3.92428e-19	6.14215e-18	26.9946
50498	222.765	-4.75204	0.925059	-5.13701	2.79139e-07	1.21361e-06	26.9467
547253	55.8493	-4.74973	1.32725	-3.57864	0.00034539	0.000930829	26.9037
237082	420.507	-4.74868	0.383961	-12.3676	3.91319e-35	1.79787e-33	26.8841
100041244	29.1276	-4.74804	0.910139	-5.21683	1.82011e-07	8.12494e-07	26.8722
217356	198.157	-4.74774	1.02598	-4.6275	3.70099e-06	1.37388e-05	26.8666
667276	5.44184	-4.74681	2.08372	-2.27804	0.0227239	0.0416079	26.8492
66815	26.313	-4.74637	1.26105	-3.76383	0.00016733	0.000476555	26.841
170757	100.612	-4.74185	0.977332	-4.85183	1.22325e-06	4.84911e-06	26.7571
72243	2.61498	-4.7416	2.23365	-2.1228	0.0337705	0.0591762	26.7524
12389	100.87	-4.73735	0.396718	-11.9413	7.20571e-33	2.77964e-31	26.6737
12445	1428.57	-4.73548	0.898493	-5.27046	1.3608e-07	6.18258e-07	26.6391
16513	824.39	-4.72894	0.600562	-7.87419	3.42956e-15	3.65909e-14	26.5187
12683	5.87616	-4.72637	1.36413	-3.46476	0.000530704	0.00138794	26.4716
100504604	25.3957	-4.72587	0.705964	-6.6942	2.16848e-11	1.58905e-10	26.4623
333883	20.7853	-4.72367	0.982862	-4.80604	1.53947e-06	6.02571e-06	26.4221
77700	4.3853	-4.72242	1.26779	-3.72493	0.000195367	0.000550176	26.3992
381917	18.935	-4.7201	0.897937	-5.25661	1.46733e-07	6.6389e-07	26.3568
69710	655.587	-4.7194	0.932309	-5.06206	4.14752e-07	1.75289e-06	26.344
235345	2.21808	-4.7183	1.782	-2.64776	0.00810279	0.0165475	26.3238
15107	1349.57	-4.71332	0.549074	-8.58412	9.15334e-18	1.25073e-16	26.2331
12490	274.401	-4.71228	0.54672	-8.61918	6.74331e-18	9.339e-17	26.2142
22625	16.0815	-4.71189	1.1582	-4.06828	4.73616e-05	0.000147749	26.2072
19696	303.901	-4.7026	1.04006	-4.52147	6.14114e-06	2.19743e-05	26.039
76469	82.0249	-4.70242	1.13053	-4.15948	3.18979e-05	0.000102339	26.0358
69036	2.99572	-4.70013	1.93091	-2.43415	0.0149268	0.0285968	25.9945
66789	946.725	-4.69495	0.5248	-8.94616	3.68056e-19	5.77727e-18	25.9012
80893	91.0569	-4.69356	0.675002	-6.9534	3.56595e-12	2.8465e-11	25.8762
269629	302.408	-4.69261	0.482524	-9.72513	2.35597e-22	4.67083e-21	25.8593
74013	448.571	-4.69251	0.587927	-7.98144	1.44636e-15	1.59411e-14	25.8574
214547	49.1169	-4.69135	1.07428	-4.36697	1.25979e-05	4.308e-05	25.8367
67248	17.5242	-4.68988	1.03937	-4.51224	6.4147e-06	2.2888e-05	25.8104
13110	683.941	-4.68986	0.464132	-10.1046	5.27206e-24	1.16213e-22	25.8101
100042889	36.074	-4.68543	0.770104	-6.08415	1.1711e-09	6.97799e-09	25.7308
14254	139.294	-4.68347	0.672218	-6.96719	3.2333e-12	2.59489e-11	25.696
76187	30.9353	-4.67905	0.985648	-4.74718	2.06276e-06	7.94784e-06	25.6173
142980	34.1522	-4.67393	0.874466	-5.34489	9.04715e-08	4.21582e-07	25.5265
171170	97.0095	-4.673	1.07921	-4.33004	1.49084e-05	5.05057e-05	25.5102
73341	361.392	-4.67182	1.00565	-4.64556	3.39161e-06	1.26796e-05	25.4893
18553	676.011	-4.6696	0.662642	-7.04693	1.82905e-12	1.50256e-11	25.4501
620966	65.6639	-4.66085	0.622701	-7.48489	7.1607e-14	6.80537e-13	25.2962
18260	18.9099	-4.65533	0.911921	-5.10497	3.30841e-07	1.42027e-06	25.1996
73723	5363.52	-4.65277	0.398431	-11.6777	1.65633e-31	5.98036e-30	25.155
116847	198.991	-4.65106	0.825234	-5.63605	1.73997e-08	8.93533e-08	25.1251
73270	23.6514	-4.65098	0.704545	-6.6014	4.07297e-11	2.90779e-10	25.1238
12346	2.48468	-4.64818	1.54375	-3.01097	0.00260417	0.00594386	25.0751
29817	409.176	-4.64514	0.917337	-5.06372	4.11145e-07	1.73899e-06	25.0223
21386	114.424	-4.64406	0.745868	-6.22638	4.77332e-10	2.99013e-09	25.0035
20354	4224.72	-4.64152	0.21943	-21.1527	2.60841e-99	1.58012e-96	24.9595
75767	477.466	-4.63493	0.856818	-5.40947	6.32121e-08	3.00639e-07	24.8458
12575	829.684	-4.63408	0.936577	-4.94788	7.50242e-07	3.08471e-06	24.8311
21802	2360.99	-4.63208	0.527157	-8.7869	1.53745e-18	2.29022e-17	24.7967
108052	70.1519	-4.63177	0.643618	-7.19646	6.17953e-13	5.38478e-12	24.7914
13244	3164.95	-4.63147	0.402966	-11.4935	1.42291e-30	4.82844e-29	24.7863
67739	5123.25	-4.61882	0.495933	-9.31339	1.23821e-20	2.19179e-19	24.5698
12227	4353.99	-4.61745	0.966514	-4.77743	1.77551e-06	6.89794e-06	24.5466
110257	133.888	-4.60791	1.06454	-4.32853	1.50108e-05	5.07895e-05	24.3849
209200	69.7854	-4.60549	0.943936	-4.87903	1.06609e-06	4.27271e-06	24.344
76438	770.643	-4.60539	0.431499	-10.673	1.36134e-26	3.60291e-25	24.3423
68428	43.3143	-4.60435	1.08521	-4.2428	2.20747e-05	7.25006e-05	24.3247
69864	2.95775	-4.60123	1.96421	-2.34253	0.0191536	0.0356969	24.2721
100502668	108.863	-4.60046	0.408188	-11.2704	1.83638e-29	5.80964e-28	24.2593
27218	8.71531	-4.59943	1.65104	-2.78577	0.00534005	0.011386	24.2419
233271	1294.5	-4.59894	0.483435	-9.51303	1.85188e-21	3.46164e-20	24.2336
83671	241.088	-4.59668	0.913975	-5.02933	4.92197e-07	2.06314e-06	24.1958
13024	29.5516	-4.59614	1.18245	-3.88697	0.000101502	0.000300267	24.1867
100861595	26.1898	-4.59561	0.996361	-4.61239	3.98061e-06	1.47101e-05	24.1778
68859	464.764	-4.59493	0.521977	-8.80293	1.33286e-18	1.99635e-17	24.1663
20501	1141.72	-4.59143	0.694786	-6.6084	3.88497e-11	2.78086e-10	24.1078
319179	36.6968	-4.58981	0.718772	-6.38563	1.70696e-10	1.12305e-09	24.0808
319187	1.99791	-4.5864	2.16527	-2.11816	0.0341611	0.0597902	24.0238
12224	175.93	-4.58542	0.999728	-4.58666	4.50384e-06	1.65094e-05	24.0076
100862175	47.8399	-4.58293	0.61402	-7.4638	8.40618e-14	7.89727e-13	23.9661
210710	101.268	-4.5705	0.303823	-15.0433	3.82138e-51	4.34045e-49	23.7605
233529	42.952	-4.56738	0.912522	-5.00523	5.57949e-07	2.32327e-06	23.7094
14457	1589.15	-4.56558	0.547631	-8.33697	7.62193e-17	9.63403e-16	23.6798
21682	115.698	-4.56495	0.978298	-4.66622	3.06794e-06	1.15249e-05	23.6694
50528	3.67444	-4.56101	1.45454	-3.13571	0.00171438	0.00405852	23.6049
100043755	12.5328	-4.56027	0.979	-4.65809	3.19162e-06	1.19675e-05	23.5927
24109	6316.28	-4.55746	0.313837	-14.5217	8.8242e-48	8.39119e-46	23.5468
66929	285.701	-4.5438	1.04989	-4.32788	1.50549e-05	5.09073e-05	23.3249
240754	62.1517	-4.54134	1.2128	-3.7445	0.000180753	0.000512019	23.2852
15511	427.794	-4.54009	0.597972	-7.59247	3.13861e-14	3.07212e-13	23.265
140483	20.4255	-4.53789	1.13977	-3.98141	6.85085e-05	0.000208392	23.2296
14912	1373.87	-4.53733	0.915707	-4.955	7.23296e-07	2.98066e-06	23.2206
435784	13.8879	-4.53555	0.909668	-4.98594	6.16608e-07	2.55646e-06	23.1919
212439	103.97	-4.5353	0.621878	-7.29291	3.03335e-13	2.70668e-12	23.1879
23871	826.778	-4.53509	0.577596	-7.85166	4.10578e-15	4.36349e-14	23.1845
53415	145.451	-4.53334	0.551793	-8.21565	2.11025e-16	2.55892e-15	23.1563
100504349	4.8734	-4.53153	1.5857	-2.85774	0.00426672	0.00930361	23.1273
71962	34.3888	-4.52972	0.875051	-5.17652	2.26064e-07	9.96095e-07	23.0984
224079	20.6903	-4.52854	0.965539	-4.69017	2.72984e-06	1.03403e-05	23.0795
12580	50.9451	-4.52793	0.992238	-4.56334	5.03451e-06	1.82703e-05	23.0697
12053	267.277	-4.52585	0.833706	-5.42859	5.67998e-08	2.71722e-07	23.0365
217517	884.119	-4.52471	0.578865	-7.81653	5.42994e-15	5.69673e-14	23.0183
67203	1195.42	-4.52449	0.408494	-11.076	1.6398e-28	4.92121e-27	23.0148
66286	1899.96	-4.52444	0.422268	-10.7146	8.69276e-27	2.31561e-25	23.014
78388	255.19	-4.52302	0.972418	-4.65131	3.29831e-06	1.23506e-05	22.9913
243864	7.09408	-4.51999	1.51951	-2.97463	0.00293346	0.00662703	22.9431
212073	22.2243	-4.51694	1.03941	-4.34569	1.38837e-05	4.72104e-05	22.8947
27280	825.523	-4.51378	0.553309	-8.15778	3.41227e-16	4.05899e-15	22.8445
21939	41.53	-4.50559	0.734922	-6.1307	8.74937e-10	5.28452e-09	22.7152
27226	483.528	-4.50363	0.731894	-6.15339	7.5844e-10	4.61326e-09	22.6844
66889	142.738	-4.50297	0.804595	-5.59657	2.1863e-08	1.1109e-07	22.6741
24058	20.7787	-4.50118	0.912971	-4.93025	8.21233e-07	3.35383e-06	22.6459
278676	18.1744	-4.49889	1.05748	-4.25433	2.09671e-05	6.91966e-05	22.61
77741	6.28917	-4.49448	1.10703	-4.05993	4.90881e-05	0.000152931	22.541
11486	116.736	-4.49425	0.917153	-4.90022	9.57279e-07	3.8679e-06	22.5375
68888	8.30436	-4.49298	1.89505	-2.3709	0.0177449	0.0333375	22.5175
11610	324.929	-4.49236	0.880583	-5.10157	3.36844e-07	1.4449e-06	22.5078
17863	127.822	-4.49081	0.770367	-5.82944	5.56146e-09	3.04402e-08	22.4837
100503337	6.46012	-4.48925	1.34795	-3.33043	0.000867116	0.00217992	22.4595
21687	123.751	-4.48116	1.24041	-3.61263	0.000303108	0.000826411	22.3338
19039	55.6842	-4.47795	0.58038	-7.71555	1.20463e-14	1.22226e-13	22.2842
20197	7.64648	-4.47574	1.59746	-2.80179	0.00508198	0.0108897	22.2502
66514	1856.07	-4.47551	0.3774	-11.8588	1.93755e-32	7.33578e-31	22.2465
100041649	631.281	-4.47201	0.536298	-8.33866	7.51386e-17	9.51213e-16	22.1926
319161	1.92845	-4.47019	1.85868	-2.40503	0.0161712	0.030716	22.1646
20497	22.3056	-4.4647	1.02854	-4.3408	1.41965e-05	4.82039e-05	22.0804
333182	141.793	-4.46023	0.721056	-6.18569	6.18295e-10	3.81329e-09	22.0122
107227	275.725	-4.45539	0.645553	-6.90166	5.13993e-12	4.03014e-11	21.9384
320478	860.619	-4.45145	0.551211	-8.07576	6.70556e-16	7.73077e-15	21.8786
266632	159.522	-4.45078	0.676607	-6.57809	4.76534e-11	3.36247e-10	21.8685
72495	15.0197	-4.45024	0.795559	-5.59386	2.22082e-08	1.12737e-07	21.8603
17436	1948.93	-4.44891	0.521735	-8.52715	1.49995e-17	2.01587e-16	21.8401
210808	130.505	-4.44796	0.557879	-7.97297	1.54901e-15	1.70152e-14	21.8257
67991	3802.99	-4.44538	0.583762	-7.61506	2.63573e-14	2.60013e-13	21.7867
72891	2.22622	-4.44478	1.57428	-2.82337	0.00475211	0.0102621	21.7777
18805	367.697	-4.44307	0.33696	-13.1858	1.0598e-39	6.23526e-38	21.7519
12075	153.806	-4.43528	0.659363	-6.72661	1.73659e-11	1.28873e-10	21.6348
240672	514.659	-4.43407	0.717527	-6.17966	6.42412e-10	3.9516e-09	21.6167
114654	57.2092	-4.43377	0.699701	-6.33666	2.34799e-10	1.52456e-09	21.6121
17063	2.01669	-4.43182	1.86905	-2.37117	0.017732	0.033317	21.583
244853	404.649	-4.43115	0.5323	-8.32454	8.4658e-17	1.06842e-15	21.5729
12193	993.961	-4.43092	0.716955	-6.18019	6.40236e-10	3.93969e-09	21.5695
12514	768.801	-4.42992	0.755822	-5.86107	4.59892e-09	2.54983e-08	21.5546
76893	4797.87	-4.42859	0.343591	-12.8892	5.1803e-38	2.79634e-36	21.5348
320277	14.4626	-4.42683	1.0783	-4.1054	4.03623e-05	0.000127519	21.5085
11548	244.953	-4.42599	0.759018	-5.83121	5.50277e-09	3.0162e-08	21.4959
27360	1854.32	-4.42479	0.472128	-9.37203	7.1152e-21	1.28735e-19	21.4781
68204	7.22051	-4.42447	1.18278	-3.74073	0.000183487	0.000519493	21.4732
100041450	4.52028	-4.42363	1.98109	-2.23293	0.0255539	0.046219	21.4608
272411	14.7674	-4.42341	1.16436	-3.79901	0.000145273	0.000418177	21.4575
69574	56.641	-4.42237	0.758633	-5.8294	5.56283e-09	3.04402e-08	21.4421
67075	1502.36	-4.42113	0.534381	-8.27336	1.3024e-16	1.61257e-15	21.4235
18566	2.03809	-4.42071	2.27574	-1.94254	0.0520719	0.0866064	21.4174
319166	25.3281	-4.4185	0.771989	-5.72353	1.04335e-08	5.50665e-08	21.3846
106877	910.265	-4.41693	0.455093	-9.70555	2.85541e-22	5.5865e-21	21.3614
56226	8.93081	-4.41652	1.05561	-4.18385	2.86612e-05	9.25534e-05	21.3553
14667	1522.53	-4.41602	0.561582	-7.86354	3.73425e-15	3.9764e-14	21.3479
12267	51.9161	-4.41264	0.944966	-4.66963	3.01748e-06	1.13526e-05	21.2979
56791	163.964	-4.41207	0.829592	-5.31837	1.04704e-07	4.83494e-07	21.2895
72575	50.0022	-4.41107	0.631963	-6.97995	2.95279e-12	2.38028e-11	21.2748
67547	144.703	-4.40421	0.662489	-6.64797	2.97159e-11	2.15154e-10	21.1738
100042561	63.0572	-4.40344	0.624181	-7.05474	1.72918e-12	1.42696e-11	21.1625
11717	522.526	-4.40134	0.872623	-5.04381	4.56357e-07	1.92029e-06	21.1318
209378	779.102	-4.39597	0.581683	-7.55732	4.11447e-14	3.99859e-13	21.0532
664862	353.353	-4.39585	0.358883	-12.2487	1.70681e-34	7.42464e-33	21.0516
100043102	10.3087	-4.39519	1.11406	-3.9452	7.97345e-05	0.000239996	21.0418
67888	113.606	-4.39348	1.06485	-4.1259	3.69295e-05	0.000117285	21.0169
404739	1.8453	-4.39244	2.23676	-1.96375	0.0495594	0.0829115	21.0018
14085	477.91	-4.39162	0.57156	-7.68356	1.54722e-14	1.54968e-13	20.9899
66990	1705.92	-4.39045	0.35952	-12.212	2.68298e-34	1.14577e-32	20.9729
30939	380.935	-4.3904	0.425415	-10.3203	5.70565e-25	1.32937e-23	20.9722
68519	6506.78	-4.38982	0.531291	-8.26255	1.4259e-16	1.75882e-15	20.9636
54371	5314.38	-4.38888	0.588014	-7.4639	8.40001e-14	7.89601e-13	20.95
68226	617.354	-4.38563	0.582379	-7.53053	5.0534e-14	4.87919e-13	20.9028
18613	244.306	-4.38399	0.53002	-8.27138	1.32417e-16	1.63829e-15	20.8792
628324	1.88401	-4.38388	2.25351	-1.94535	0.0517323	0.0861555	20.8776
69121	6.59758	-4.38336	1.74787	-2.50784	0.0121473	0.0238199	20.87
22415	347.354	-4.3825	0.794385	-5.51685	3.45138e-08	1.70238e-07	20.8576
18578	2019.03	-4.37811	0.378312	-11.5728	5.66294e-31	1.9707e-29	20.7942
71831	2.96832	-4.37749	2.27657	-1.92285	0.0544994	0.0900851	20.7852
14870	823.242	-4.37641	0.507206	-8.62848	6.21743e-18	8.65466e-17	20.7698
213469	1228.08	-4.37469	0.706375	-6.19316	5.89706e-10	3.64384e-09	20.745
57437	7021.37	-4.37315	0.488154	-8.95855	3.28967e-19	5.18861e-18	20.7228
13423	90.7908	-4.37022	0.708641	-6.16703	6.95831e-10	4.25777e-09	20.6807
319554	525.809	-4.3649	0.569317	-7.6669	1.76201e-14	1.75835e-13	20.6046
17718	127.592	-4.36274	0.649067	-6.72156	1.79792e-11	1.33062e-10	20.5739
20393	2865.27	-4.36197	0.544017	-8.01807	1.07418e-15	1.20668e-14	20.5629
80708	345.897	-4.35921	0.676046	-6.44809	1.13269e-10	7.64065e-10	20.5235
71602	898.074	-4.35747	0.636649	-6.84438	7.68098e-12	5.87376e-11	20.4988
21452	898.158	-4.35738	0.602678	-7.23004	4.82869e-13	4.23021e-12	20.4976
75480	28.4053	-4.35186	1.0365	-4.19863	2.68531e-05	8.70756e-05	20.4193
67698	539.264	-4.35181	0.328035	-13.2663	3.63019e-40	2.20726e-38	20.4186
23796	137.923	-4.34932	0.831299	-5.23196	1.67725e-07	7.52415e-07	20.3834
109019	466.203	-4.34853	0.909177	-4.78293	NA	NA	20.3722
18858	271.171	-4.34849	0.526886	-8.25318	1.54231e-16	1.89385e-15	20.3716
18113	6.30167	-4.34817	1.20055	-3.62181	0.000292552	0.000799763	20.3671
241116	29.5398	-4.34792	1.06295	-4.09044	4.30561e-05	0.000135558	20.3635
72082	2.23906	-4.34781	1.65894	-2.62083	0.0087716	0.0177516	20.362
73472	4.22581	-4.3459	1.55529	-2.79428	0.00520157	0.0111197	20.3351
22441	1.7186	-4.34478	1.875	-2.31722	0.0204919	0.037906	20.3193
329509	29.5144	-4.33904	0.876649	-4.94958	7.43741e-07	3.06106e-06	20.2387
69922	54.0431	-4.33747	0.855668	-5.0691	3.9971e-07	1.69413e-06	20.2166
67111	222.026	-4.33601	0.842887	-5.14424	2.68601e-07	1.17122e-06	20.1962
19263	238.483	-4.33106	0.823413	-5.25988	1.4415e-07	6.52744e-07	20.1269
26941	868.714	-4.32848	0.571283	-7.57677	3.5427e-14	3.44907e-13	20.0911
15139	20.9119	-4.32477	0.782073	-5.52988	3.20454e-08	1.58925e-07	20.0394
100502856	2.19217	-4.32423	2.35837	-1.83357	0.0667179	0.107883	20.0319
78634	2.19217	-4.32423	2.35837	-1.83357	0.0667179	0.107883	20.0319
66197	99.8248	-4.32394	0.894697	-4.83286	1.34587e-06	5.31074e-06	20.0279
73724	495.019	-4.32367	0.430975	-10.0323	1.09917e-23	2.36864e-22	20.0242
100043335	15.3425	-4.32097	1.40294	-3.07995	0.00207033	0.00481889	19.9868
64291	2988.27	-4.31823	0.494251	-8.73692	2.39549e-18	3.47963e-17	19.9489
17725	78456.1	-4.31636	0.589753	-7.31892	2.49972e-13	2.25886e-12	19.9229
100504360	120.565	-4.31375	0.587453	-7.34314	2.08647e-13	1.89381e-12	19.8869
546336	193.507	-4.31061	0.590933	-7.29458	2.99592e-13	2.67767e-12	19.8437
73647	12.636	-4.309	1.75169	-2.45991	0.013897	0.0268358	19.8215
546166	26.9604	-4.30596	1.50949	-2.8526	0.00433635	0.00944663	19.7799
18682	71.014	-4.3046	0.731507	-5.88456	3.99116e-09	2.22873e-08	19.7612
56437	61.0983	-4.30316	0.972936	-4.42286	9.74039e-06	3.38533e-05	19.7415
66124	1392.23	-4.29948	0.494016	-8.70312	3.22882e-18	4.63251e-17	19.6913
213945	28.2181	-4.29915	0.744498	-5.77457	7.71511e-09	4.13253e-08	19.6867
217721	55.0784	-4.29826	0.997616	-4.30853	1.64341e-05	5.51358e-05	19.6746
51798	1115.77	-4.29596	0.380168	-11.3002	1.30942e-29	4.17483e-28	19.6433
67213	1325.62	-4.29518	0.684579	-6.27418	3.51478e-10	2.23688e-09	19.6326
66153	109.365	-4.29179	0.643157	-6.67301	2.50617e-11	1.82832e-10	19.5865
99662	1.94002	-4.28866	1.91356	-2.2412	0.0250134	0.0453972	19.5441
100034726	14.1027	-4.28709	0.691621	-6.19862	5.69615e-10	3.52235e-09	19.5229
20730	1.97872	-4.28476	1.96669	-2.17867	0.0293563	0.0522187	19.4914
100042480	968.426	-4.28438	0.897934	-4.77137	1.82977e-06	7.09526e-06	19.4861
16816	38.7294	-4.2814	0.808635	-5.2946	1.19276e-07	5.45699e-07	19.446
76422	24.2944	-4.27687	1.11885	-3.82256	0.000132075	0.000382815	19.385
17260	336.882	-4.27389	0.644305	-6.63333	3.28194e-11	2.36369e-10	19.345
14579	400.796	-4.27195	0.407939	-10.472	1.1614e-25	2.90456e-24	19.319
64381	1.68754	-4.27021	2.26266	-1.88725	0.0591268	0.0968239	19.2957
73712	21.0983	-4.27012	0.772521	-5.52751	3.248e-08	1.60934e-07	19.2945
217262	180.062	-4.26676	0.545611	-7.82015	5.27584e-15	5.53862e-14	19.2497
16364	39.1679	-4.26481	0.79528	-5.36266	8.20051e-08	3.8388e-07	19.2237
11363	755.45	-4.26173	0.423794	-10.0561	8.63241e-24	1.87755e-22	19.1827
16612	1.7938	-4.25794	2.00374	-2.125	0.0335868	0.0588796	19.1323
56613	237.174	-4.25551	0.43475	-9.78839	1.26291e-22	2.5533e-21	19.1001
56338	835.399	-4.25488	0.820646	-5.18479	2.16255e-07	9.56997e-07	19.0918
381418	59.2345	-4.24981	0.869378	-4.88834	1.01692e-06	4.0947e-06	19.0248
78688	235.299	-4.24915	0.674197	-6.30253	2.92833e-10	1.88121e-09	19.0161
17076	383.632	-4.24875	1.02415	-4.14854	3.34601e-05	0.000106994	19.0108
100504235	1.9935	-4.24209	2.35866	-1.79851	0.0720955	0.115361	18.9232
74281	1.9935	-4.24209	2.35866	-1.79851	0.0720955	0.115361	18.9232
231253	1.9935	-4.24209	2.35866	-1.79851	0.0720955	0.115361	18.9232
11497	1.9935	-4.24209	2.35866	-1.79851	0.0720955	0.115361	18.9232
67745	5.06324	-4.24024	1.2783	-3.3171	0.000909586	0.00227933	18.899
19663	212.753	-4.23993	0.710568	-5.96696	2.41719e-09	1.38333e-08	18.8949
21803	175.523	-4.2395	0.794617	-5.33527	9.54036e-08	4.42924e-07	18.8893
227923	7.92395	-4.23894	1.49844	-2.8289	0.00467085	0.0101013	18.8821
15507	33.3127	-4.23772	0.570902	-7.42286	1.14621e-13	1.06398e-12	18.8661
17880	47.1341	-4.23591	0.73426	-5.76894	7.977e-09	4.25544e-08	18.8423
17920	4182.59	-4.23518	0.548334	-7.72372	1.12982e-14	1.15136e-13	18.8328
13590	1.72551	-4.23446	2.29484	-1.84521	0.065007	0.105408	18.8234
97998	142.431	-4.23376	0.553739	-7.64577	2.07694e-14	2.06169e-13	18.8144
71929	1049.41	-4.23054	0.380218	-11.1266	9.31042e-29	2.85171e-27	18.7724
11676	671.487	-4.22882	0.613536	-6.89254	5.48041e-12	4.28888e-11	18.7501
100502742	36.1178	-4.22549	0.811264	-5.20853	1.90342e-07	8.48523e-07	18.7068
68176	93.6229	-4.2247	0.666202	-6.34147	2.27576e-10	1.4806e-09	18.6966
18591	79.2798	-4.21998	0.598783	-7.04759	1.82038e-12	1.49618e-11	18.6355
433424	36.5849	-4.21939	0.423122	-9.97205	2.02022e-23	4.29685e-22	18.6279
57896	400.921	-4.21914	0.344739	-12.2386	1.93275e-34	8.363e-33	18.6246
170574	48.9024	-4.21505	0.576238	-7.31477	2.57813e-13	2.32458e-12	18.572
51875	1341.83	-4.21014	0.584143	-7.20738	5.70379e-13	4.98085e-12	18.5088
74008	242.277	-4.2081	0.683335	-6.15818	7.35846e-10	4.48249e-09	18.4827
277898	1.91683	-4.20494	2.3588	-1.78266	0.0746417	0.118782	18.4422
100039078	13.3743	-4.20247	0.95736	-4.38964	1.13537e-05	3.9021e-05	18.4106
77219	1352.59	-4.20068	0.386266	-10.8751	1.51476e-27	4.23511e-26	18.3879
66139	12.381	-4.1994	1.43193	-2.93269	0.00336038	0.00747686	18.3715
109305	445.121	-4.19801	0.493257	-8.5108	1.72742e-17	2.30454e-16	18.3539
67905	533.595	-4.18887	0.716973	-5.84244	5.14403e-09	2.83381e-08	18.238
103978	93.6486	-4.18757	0.63357	-6.60949	3.85652e-11	2.7617e-10	18.2216
104362	6.73197	-4.18641	1.1618	-3.6034	0.000314082	0.000852494	18.2069
69496	1.60249	-4.17906	1.96559	-2.12611	0.0334939	0.0587355	18.1144
100504084	3.64389	-4.17063	1.28607	-3.24291	0.00118314	0.00289995	18.0088
102595	1283.47	-4.17022	0.856628	-4.86818	1.1263e-06	4.4909e-06	18.0037
105892	1.84015	-4.16637	2.35895	-1.7662	0.0773631	0.122505	17.9556
225884	1.84015	-4.16637	2.35895	-1.7662	0.0773631	0.122505	17.9556
767814	1.84015	-4.16637	2.35895	-1.7662	0.0773631	0.122505	17.9556
104183	1.84015	-4.16637	2.35895	-1.7662	0.0773631	0.122505	17.9556
320207	408.627	-4.16528	1.05103	-3.96304	7.40015e-05	0.000223976	17.9421
67486	249.909	-4.16315	0.518396	-8.03082	9.68225e-16	1.09518e-14	17.9156
66042	16.5122	-4.16281	1.23025	-3.3837	0.000715157	0.00182653	17.9115
18830	794.494	-4.16083	0.517606	-8.03862	9.08579e-16	1.03199e-14	17.8869
68304	187.298	-4.16025	0.822025	-5.06098	4.17111e-07	1.7615e-06	17.8797
78056	1.84604	-4.16016	2.35897	-1.76355	0.0778083	0.123114	17.8786
56517	126.196	-4.15726	0.587216	-7.07961	1.4456e-12	1.20436e-11	17.8426
53603	6.29301	-4.15677	1.41312	-2.94155	0.00326575	0.00729306	17.8366
74335	577.79	-4.14934	0.511724	-8.10855	5.12284e-16	5.98494e-15	17.745
100503924	99.6105	-4.14684	0.56691	-7.31481	2.5774e-13	2.32458e-12	17.7142
100503882	3.1811	-4.14638	1.38093	-3.0026	0.00267681	0.006102	17.7087
12918	12.8994	-4.14522	1.39179	-2.97833	0.00289824	0.0065538	17.6943
71200	1.79885	-4.14364	1.61789	-2.56114	0.010433	0.0207266	17.675
20909	598.55	-4.14048	0.453821	-9.12359	7.26736e-20	1.20798e-18	17.6363
16573	13254	-4.13956	0.566808	-7.30329	2.80825e-13	2.51818e-12	17.6251
109754	10767.3	-4.13923	0.544301	-7.60468	2.85609e-14	2.80735e-13	17.6211
229445	260.709	-4.1365	0.45698	-9.05181	1.40613e-19	2.28387e-18	17.5877
100504674	125.445	-4.1364	0.698218	-5.92423	3.13767e-09	1.77638e-08	17.5865
72349	993.862	-4.13567	0.47865	-8.6403	5.60676e-18	7.83796e-17	17.5777
667772	20.043	-4.13153	1.48747	-2.77756	0.00547694	0.0116384	17.5273
60596	469.227	-4.12998	0.609415	-6.77696	1.2273e-11	9.23782e-11	17.5084
27279	57.6984	-4.12792	0.861614	-4.79092	1.66018e-06	6.47445e-06	17.4835
16821	1.76348	-4.12625	2.35911	-1.74907	0.0802786	0.126545	17.4633
20850	121.008	-4.12469	0.830432	-4.96692	6.80242e-07	2.80677e-06	17.4444
11858	3350.73	-4.12274	0.524717	-7.85707	3.93236e-15	4.1819e-14	17.4208
319170	1.45973	-4.12201	2.26454	-1.82024	0.0687226	0.1106	17.412
67971	5893.24	-4.12176	0.60708	-6.78947	1.12543e-11	8.4945e-11	17.4089
20868	1747.96	-4.11553	0.951965	-4.32319	1.53789e-05	5.18956e-05	17.3339
218454	590.953	-4.11518	0.344893	-11.9318	8.08351e-33	3.10361e-31	17.3298
16432	9170.72	-4.11444	0.341166	-12.06	1.71882e-33	6.92441e-32	17.3209
98363	31.9161	-4.11261	0.794073	-5.17913	2.22921e-07	9.84365e-07	17.2989
50709	141.68	-4.1078	0.562851	-7.2982	2.91641e-13	2.61089e-12	17.2414
665333	7.83876	-4.10698	1.18797	-3.45715	0.000545913	0.00142476	17.2316
93689	63.4209	-4.10695	0.797861	-5.14745	2.64047e-07	1.1529e-06	17.2312
15368	355.942	-4.10652	0.831596	-4.93812	7.88786e-07	3.23019e-06	17.2261
71706	183.41	-4.10623	1.01384	-4.05016	5.11821e-05	0.00015894	17.2226
76073	83.1163	-4.1026	0.718396	-5.71079	1.12456e-08	5.90663e-08	17.1793
104444	1448.5	-4.10142	0.469009	-8.74486	2.23296e-18	3.2522e-17	17.1652
109904	101.239	-4.09925	1.1206	-3.65809	0.000254099	0.000702035	17.1395
791270	1.73066	-4.09895	2.35922	-1.73741	0.082314	0.129243	17.1359
110759	1.73066	-4.09895	2.35922	-1.73741	0.082314	0.129243	17.1359
13168	19.9502	-4.09633	1.14499	-3.57762	0.000346736	0.000934147	17.1048
14225	19349.4	-4.09552	0.511602	-8.00529	1.19181e-15	1.32969e-14	17.0953
20723	11.1486	-4.09503	1.14044	-3.59074	0.000329734	0.000892017	17.0894
15365	62.7217	-4.09421	0.90806	-4.50875	6.52116e-06	2.32476e-05	17.0797
170752	15.1024	-4.09353	1.31379	-3.11582	0.00183434	0.00431007	17.0716
100039786	8.9528	-4.09279	1.88807	-2.16771	0.0301806	0.0535336	17.0629
13190	24.3164	-4.08855	1.02327	-3.99556	6.4541e-05	0.000197315	17.0128
332110	51.4908	-4.08754	0.571653	-7.15038	8.65366e-13	7.42209e-12	17.0009
13654	155.037	-4.08471	1.04778	-3.89846	9.68082e-05	0.000287524	16.9676
240873	1.68681	-4.08447	2.35928	-1.73123	0.0834102	0.130701	16.9647
380780	1.68681	-4.08447	2.35928	-1.73123	0.0834102	0.130701	16.9647
100775175	1.68681	-4.08447	2.35928	-1.73123	0.0834102	0.130701	16.9647
93725	1.68681	-4.08447	2.35928	-1.73123	0.0834102	0.130701	16.9647
546038	1.68681	-4.08447	2.35928	-1.73123	0.0834102	0.130701	16.9647
20400	1.68681	-4.08447	2.35928	-1.73123	0.0834102	0.130701	16.9647
230661	490.902	-4.08405	0.466964	-8.74596	2.21125e-18	3.22633e-17	16.9599
243912	159.345	-4.07988	0.591471	-6.89784	5.27979e-12	4.13583e-11	16.9108
665610	12.1355	-4.07899	0.834716	-4.88669	1.02548e-06	4.12511e-06	16.9005
234577	595.577	-4.07615	0.594381	-6.8578	6.99281e-12	5.38555e-11	16.8672
68545	57.7949	-4.07198	0.63205	-6.44249	1.17527e-10	7.89431e-10	16.8185
30938	449.236	-4.06917	0.307413	-13.2368	5.37795e-40	3.21028e-38	16.7858
777655	1.42176	-4.06548	2.28213	-1.78144	0.0748405	0.119063	16.7429
54598	229.792	-4.06526	0.649991	-6.25433	3.99232e-10	2.51923e-09	16.7404
236920	173.211	-4.05392	0.939962	-4.31285	1.61161e-05	5.41375e-05	16.6093
100038425	24.1514	-4.05084	0.734867	-5.51234	3.54087e-08	1.74167e-07	16.5739
12390	80.4283	-4.04988	0.634898	-6.37878	1.78501e-10	1.17252e-09	16.5628
20692	3477.65	-4.04746	0.435346	-9.29712	1.44305e-20	2.54338e-19	16.5351
14763	631.121	-4.04572	0.671227	-6.02735	1.66665e-09	9.76354e-09	16.5152
70933	4.19866	-4.04524	1.93367	-2.092	0.0364388	0.0632555	16.5097
320709	319.447	-4.04266	0.540385	-7.48107	7.37224e-14	6.99422e-13	16.4802
66273	559.724	-4.04184	0.512689	-7.88361	3.18064e-15	3.40016e-14	16.4708
15077	102.765	-4.04153	0.555309	-7.27799	3.38829e-13	3.01353e-12	16.4673
114301	88.9792	-4.04153	1.05911	-3.81597	0.000135648	0.000392406	16.4672
16165	1.61013	-4.04086	2.35947	-1.71262	0.0867833	0.135274	16.4597
73347	1.61013	-4.04086	2.35947	-1.71262	0.0867833	0.135274	16.4597
211577	2.26317	-4.03877	2.31595	-1.74389	0.0811786	0.127743	16.4358
15476	209.972	-4.03639	0.523564	-7.70945	1.2636e-14	1.27735e-13	16.4087
226250	439.608	-4.03542	0.608869	-6.62772	3.40908e-11	2.44879e-10	16.3976
620253	1.61528	-4.03376	2.3595	-1.70958	0.0873431	0.136017	16.3788
545851	1.61528	-4.03376	2.3595	-1.70958	0.0873431	0.136017	16.3788
71520	39.5297	-4.02525	0.87121	-4.6203	3.83192e-06	1.41991e-05	16.2825
403202	5.30385	-4.0246	1.54377	-2.60699	0.00913412	0.0184169	16.2752
12520	4695.28	-4.02333	0.347955	-11.5628	6.35964e-31	2.19912e-29	16.2609
69655	20.3732	-4.01871	1.12543	-3.57081	0.00035588	0.000956419	16.2088
241274	553.559	-4.01742	0.745727	-5.38726	7.15418e-08	3.38092e-07	16.1944
21826	140.398	-4.01194	0.812873	-4.9355	7.99438e-07	3.27054e-06	16.133
15220	157.04	-4.01048	1.02659	-3.90658	9.36104e-05	0.000278583	16.1166
231510	56.6729	-4.00945	1.02422	-3.91464	9.05391e-05	0.000270032	16.1051
76261	142.629	-4.00562	0.594981	-6.73235	1.66944e-11	1.24398e-10	16.0625
100041724	1.34435	-4.00211	2.28903	-1.74838	0.0803976	0.126684	16.0234
16416	468.295	-4.00107	0.416529	-9.60573	7.56195e-22	1.44321e-20	16.0118
59308	68.5248	-4.0003	0.82128	-4.87081	1.11141e-06	4.43914e-06	16.0033
56219	75.244	-3.99998	0.823073	-4.85981	1.17497e-06	4.66564e-06	15.9998
20163	662.538	-3.99738	0.557581	-7.16914	7.54717e-13	6.49692e-12	15.971
216858	66.7244	-3.996	0.575056	-6.9489	3.68149e-12	2.93586e-11	15.9557
628951	1.53346	-3.99527	2.35967	-1.69315	0.0904273	0.140166	15.9476
791315	1.53346	-3.99527	2.35967	-1.69315	0.0904273	0.140166	15.9476
381452	1.53346	-3.99527	2.35967	-1.69315	0.0904273	0.140166	15.9476
57442	1.53346	-3.99527	2.35967	-1.69315	0.0904273	0.140166	15.9476
68195	53.5384	-3.99457	0.776045	-5.14734	2.64205e-07	1.15328e-06	15.9399
18670	33.9068	-3.99334	0.850828	-4.69348	2.68595e-06	1.01929e-05	15.9264
70354	13632.6	-3.99216	0.580942	-6.87187	6.33636e-12	4.91406e-11	15.9133
320624	1.38379	-3.99103	2.30875	-1.72866	0.0838706	0.131322	15.9009
319832	176.805	-3.98864	0.600891	-6.63787	3.18242e-11	2.29707e-10	15.8745
16402	307.437	-3.98622	0.720298	-5.53413	3.12777e-08	1.554e-07	15.8479
15473	417.973	-3.98303	0.500725	-7.95451	1.79837e-15	1.96356e-14	15.8129
20498	318.013	-3.97939	0.530643	-7.49919	6.42152e-14	6.13137e-13	15.7731
276829	228.549	-3.9787	0.592684	-6.71302	1.90638e-11	1.40707e-10	15.7655
230145	30.3284	-3.97432	0.847608	-4.68887	2.74722e-06	1.04037e-05	15.7177
242805	2.14779	-3.97241	2.32379	-1.70945	0.0873674	0.136042	15.697
384214	81.2247	-3.97037	0.576936	-6.88181	5.90962e-12	4.60056e-11	15.6747
11750	372.133	-3.96803	0.873526	-4.54255	5.5579e-06	2.0032e-05	15.6494
76937	47.5611	-3.96699	0.645674	-6.14395	8.04923e-10	4.88691e-09	15.6381
67776	210.871	-3.96232	0.507013	-7.81503	5.4948e-15	5.7574e-14	15.5875
229699	52.9582	-3.96206	1.07258	-3.69395	0.000220793	0.000616683	15.5847
100503583	14.6087	-3.95786	1.47343	-2.68615	0.00722799	0.0149634	15.5394
319556	15.1315	-3.95741	1.12087	-3.53067	0.000414516	0.00110259	15.5345
67375	2.06957	-3.95714	2.31589	-1.70869	0.0875083	0.136235	15.5316
11881	826.091	-3.95652	0.694324	-5.69838	1.20952e-08	6.32852e-08	15.525
76561	123.145	-3.95367	0.455508	-8.67969	3.96843e-18	5.64414e-17	15.4943
100861652	500.906	-3.95278	0.436697	-9.05153	1.40978e-19	2.28754e-18	15.4847
20530	453.268	-3.95141	0.655769	-6.0256	1.68481e-09	9.86637e-09	15.47
78925	1267.48	-3.95013	0.523522	-7.5453	4.51263e-14	4.36996e-13	15.4564
17936	1406.15	-3.9496	0.399784	-9.87931	5.11821e-23	1.0637e-21	15.4506
56708	13.6461	-3.94917	0.744259	-5.30617	1.1195e-07	5.1554e-07	15.4461
71960	1141.62	-3.94766	0.597665	-6.60514	3.97144e-11	2.83903e-10	15.4299
30925	1.45679	-3.94749	2.35989	-1.67275	0.0943773	0.14553	15.4281
664702	1.45679	-3.94749	2.35989	-1.67275	0.0943773	0.14553	15.4281
215095	1.45679	-3.94749	2.35989	-1.67275	0.0943773	0.14553	15.4281
100042625	294.66	-3.94701	0.593112	-6.65475	2.83775e-11	2.06011e-10	15.423
68190	231.507	-3.94623	0.715672	-5.51402	3.50728e-08	1.72682e-07	15.4146
100503849	241.268	-3.9446	0.384165	-10.268	9.82296e-25	2.25652e-23	15.3972
20317	122.758	-3.94457	0.66084	-5.96903	2.38662e-09	1.36823e-08	15.397
110310	3.88302	-3.94123	1.26897	-3.10586	0.00189729	0.00444205	15.3614
319880	1416.44	-3.94033	0.325868	-12.0918	1.16733e-33	4.82144e-32	15.3517
77173	1.38319	-3.93965	2.02389	-1.94657	0.0515866	0.0859303	15.3445
66834	419.665	-3.93887	0.532398	-7.39835	1.3789e-13	1.27204e-12	15.3362
381812	33.696	-3.93846	1.237	-3.18388	0.00145317	0.00348711	15.3319
76795	7661.89	-3.93791	0.565794	-6.95998	3.40331e-12	2.72732e-11	15.3261
100169878	40.0581	-3.93593	1.22959	-3.201	0.00136952	0.0033087	15.3049
66091	3819.87	-3.93403	0.507958	-7.74479	9.57416e-15	9.81171e-14	15.2848
212862	515.077	-3.93145	0.380453	-10.3336	4.9661e-25	1.16536e-23	15.2575
100040961	4.5004	-3.93106	1.10579	-3.55496	0.00037803	0.00101196	15.2534
76768	1.74723	-3.9304	1.98269	-1.98236	0.0474389	0.0798282	15.2464
66915	3978.11	-3.92989	0.560903	-7.00636	2.4459e-12	1.98734e-11	15.241
20443	717.764	-3.92523	0.484772	-8.09706	5.63046e-16	6.54526e-15	15.1919
22092	40.8138	-3.92497	0.810709	-4.84141	1.28921e-06	5.09823e-06	15.1892
54409	170.614	-3.92392	0.738049	-5.31661	1.05717e-07	4.88033e-07	15.1781
14623	20.7422	-3.92302	1.0556	-3.71638	0.000202096	0.00056805	15.1686
14081	1942.05	-3.91938	0.170365	-23.0058	4.07518e-117	3.9208e-114	15.1304
14915	3.93337	-3.91938	1.31028	-2.99125	0.00277836	0.00631238	15.1304
68943	8433.67	-3.91741	0.554032	-7.07072	1.54129e-12	1.27642e-11	15.1097
107272	3641	-3.91328	0.48132	-8.13031	4.28192e-16	5.03487e-15	15.0666
69674	361.048	-3.91322	0.378668	-10.3342	4.9362e-25	1.16001e-23	15.066
14775	8558.69	-3.91302	0.575006	-6.80518	1.00923e-11	7.64563e-11	15.0639
232440	2111.34	-3.90565	0.474979	-8.22279	1.98826e-16	2.42144e-15	14.9871
14063	2.09129	-3.90301	2.01732	-1.93475	0.0530212	0.0879439	14.9597
631990	338.959	-3.90226	0.743402	-5.24919	1.52766e-07	6.88709e-07	14.952
232400	2.03242	-3.90181	2.33242	-1.67286	0.0943541	0.14553	14.9473
71422	2.03242	-3.90181	2.33242	-1.67286	0.0943541	0.14553	14.9473
622523	2.02654	-3.90065	2.33302	-1.67193	0.094538	0.145723	14.9353
98660	1211.19	-3.90064	0.636652	-6.1268	8.96638e-10	5.4096e-09	14.9352
100042958	3.25589	-3.90028	1.87209	-2.08339	0.037216	0.0644064	14.9315
116701	494.197	-3.89856	0.478706	-8.14396	3.82546e-16	4.52744e-15	14.9137
71684	94.4978	-3.89738	1.04935	-3.7141	0.000203928	0.000572904	14.9015
268288	1.38012	-3.89731	2.36013	-1.65131	0.0986744	0.151074	14.9007
215723	1.38012	-3.89731	2.36013	-1.65131	0.0986744	0.151074	14.9007
238412	1.38012	-3.89731	2.36013	-1.65131	0.0986744	0.151074	14.9007
67038	1.38012	-3.89731	2.36013	-1.65131	0.0986744	0.151074	14.9007
634104	1.38012	-3.89731	2.36013	-1.65131	0.0986744	0.151074	14.9007
100038525	1.38012	-3.89731	2.36013	-1.65131	0.0986744	0.151074	14.9007
212943	406.861	-3.89395	0.811486	-4.79853	1.59831e-06	6.24511e-06	14.866
666752	10.1832	-3.89391	1.17915	-3.30231	0.000958908	0.00239339	14.8657
80876	622.139	-3.89323	0.96175	-4.04807	5.16424e-05	0.000160217	14.8586
227630	1.38453	-3.88908	2.36017	-1.6478	0.0993936	0.152075	14.816
545847	1.38453	-3.88908	2.36017	-1.6478	0.0993936	0.152075	14.816
100040563	19.7566	-3.88889	0.854323	-4.55202	5.31335e-06	1.92268e-05	14.814
52009	4930.09	-3.88597	0.544032	-7.1429	9.13789e-13	7.79652e-12	14.7841
78653	219.395	-3.88378	0.610888	-6.35761	2.0492e-10	1.33799e-09	14.7617
13448	88.5392	-3.88264	0.625598	-6.20628	5.42538e-10	3.37148e-09	14.7499
67800	925.717	-3.88054	0.55068	-7.04683	1.83042e-12	1.50293e-11	14.7286
13010	3306.73	-3.8799	0.412634	-9.40275	5.31568e-21	9.66036e-20	14.7219
98386	2141.79	-3.87765	0.680277	-5.7001	1.19735e-08	6.27026e-08	14.699
67117	1019.41	-3.87498	0.414526	-9.34798	8.93375e-21	1.6022e-19	14.6719
20671	20.8152	-3.87376	1.55303	-2.49433	0.0126196	0.0246338	14.6594
319172	8.06788	-3.87342	1.69412	-2.28639	0.0222315	0.0408056	14.656
58207	121.509	-3.86937	0.645493	-5.99445	2.04181e-09	1.18173e-08	14.6149
170460	300.107	-3.8691	0.420385	-9.20371	3.45794e-20	5.89147e-19	14.6122
93961	470.019	-3.86366	0.652054	-5.92537	3.11594e-09	1.76592e-08	14.5572
14675	1.96996	-3.86351	2.02453	-1.90835	0.056346	0.0927812	14.5556
14009	282.795	-3.86217	0.611647	-6.31438	2.71247e-10	1.74735e-09	14.5422
234094	1246.25	-3.85682	0.448237	-8.60443	7.66947e-18	1.05769e-16	14.4884
67709	1.70926	-3.85652	1.97701	-1.95068	0.0510945	0.08519	14.4853
13417	73.6156	-3.85583	1.0051	-3.83625	0.000124925	0.000363055	14.4784
319579	2.85492	-3.85533	2.06643	-1.8657	0.0620836	0.101145	14.4733
72131	2.05649	-3.85517	1.61836	-2.38214	0.0172124	0.0324488	14.4718
384309	69.8003	-3.85469	0.595262	-6.47563	9.44196e-11	6.42934e-10	14.467
14133	13.2999	-3.85448	1.03336	-3.73004	0.000191449	0.000540072	14.4648
18590	457.036	-3.85361	0.421218	-9.14872	5.76097e-20	9.64446e-19	14.4561
22178	1.90844	-3.8532	2.33113	-1.65293	0.0983454	0.150697	14.452
11629	32.5917	-3.85292	0.960565	-4.01109	6.04379e-05	0.00018536	14.4492
12805	2349.3	-3.85191	0.518421	-7.43007	1.08536e-13	1.0098e-12	14.4391
16842	58.8547	-3.85092	0.573156	-6.7188	1.83228e-11	1.35421e-10	14.4292
664968	37.6757	-3.85084	0.66949	-5.7519	8.8247e-09	4.68322e-08	14.4284
14913	20.5076	-3.8507	1.18359	-3.2534	0.00114031	0.00280465	14.427
21922	39.8315	-3.84991	0.858553	-4.48418	7.31934e-06	2.59292e-05	14.4191
13823	4531.76	-3.84962	0.639859	-6.01635	1.78393e-09	1.04118e-08	14.4162
240185	608.163	-3.84774	0.666399	-5.77393	7.74453e-09	4.1463e-08	14.3974
70988	1.30344	-3.84446	2.36039	-1.62874	0.103368	0.157248	14.3647
227288	1.30344	-3.84446	2.36039	-1.62874	0.103368	0.157248	14.3647
70138	1.30344	-3.84446	2.36039	-1.62874	0.103368	0.157248	14.3647
66395	578.262	-3.83986	0.559309	-6.86537	6.63202e-12	5.12392e-11	14.319
21414	162.752	-3.8329	0.729764	-5.25225	1.50256e-07	6.78889e-07	14.2501
100504333	49.3202	-3.82853	0.880125	-4.34999	1.36146e-05	4.63725e-05	14.207
20304	2.00011	-3.82797	2.0704	-1.8489	0.0644721	0.104629	14.2015
71078	1.994	-3.82711	2.07108	-1.84789	0.0646189	0.104831	14.1931
76467	261.013	-3.82534	0.394889	-9.68711	3.42079e-22	6.64494e-21	14.1756
237300	7.33547	-3.82441	1.40017	-2.73138	0.00630698	0.0132151	14.1665
14433	373.751	-3.82262	0.263169	-14.5253	8.37652e-48	8.01207e-46	14.1489
94180	507.383	-3.82003	0.705469	-5.41487	6.13326e-08	2.9238e-07	14.1235
223433	324.495	-3.81811	0.744443	-5.12882	2.91571e-07	1.26196e-06	14.1048
626802	3.16887	-3.81654	1.67478	-2.27883	0.0226769	0.0415345	14.0894
620078	1.26547	-3.81614	2.36053	-1.61665	0.105955	0.160641	14.0855
394436	1.26547	-3.81614	2.36053	-1.61665	0.105955	0.160641	14.0855
434218	1.26547	-3.81614	2.36053	-1.61665	0.105955	0.160641	14.0855
72391	68.299	-3.81454	0.961859	-3.9658	7.31513e-05	0.00022169	14.0699
104252	633.745	-3.81345	0.473781	-8.04897	8.34925e-16	9.52303e-15	14.0593
19703	95.82	-3.81207	0.833939	-4.57116	4.85036e-06	1.76726e-05	14.0458
331004	353.84	-3.80916	0.417276	-9.12863	6.93705e-20	1.15542e-18	14.0175
194908	67.0489	-3.80885	0.792984	-4.80319	1.5616e-06	6.11041e-06	14.0145
110785	1.18954	-3.80817	2.33496	-1.63093	0.102904	0.15667	14.0079
215280	338.86	-3.80606	0.556162	-6.84344	7.73116e-12	5.90892e-11	13.9875
76263	113.435	-3.80593	0.493305	-7.71517	1.20818e-14	1.22511e-13	13.9862
20208	1.25709	-3.80372	2.07548	-1.8327	0.0668478	0.108051	13.9648
29811	1291.98	-3.80353	0.491403	-7.74015	9.92998e-15	1.01509e-13	13.963
208647	255.346	-3.80159	0.475252	-7.99909	1.25341e-15	1.39651e-14	13.9441
19293	4.72302	-3.80067	1.21059	-3.13952	0.00169223	0.00401074	13.9353
319278	19.9213	-3.80064	0.88623	-4.28855	1.79841e-05	5.98715e-05	13.935
17075	59.616	-3.79841	0.828953	-4.58217	4.60171e-06	1.68455e-05	13.9134
16617	1.9904	-3.79809	2.09329	-1.81441	0.0696139	0.111865	13.9104
67870	1658	-3.79797	0.406628	-9.34017	9.61803e-21	1.71738e-19	13.9092
68279	1.18533	-3.79698	2.01081	-1.88828	0.0589885	0.0966266	13.8997
75556	3.913	-3.79658	1.79201	-2.11862	0.0341228	0.059736	13.8958
64292	82.4559	-3.79514	0.892278	-4.25332	2.10628e-05	6.94983e-05	13.882
216991	40.7071	-3.79382	0.656919	-5.77518	7.68726e-09	4.12104e-08	13.8693
22724	98.4838	-3.79366	1.03932	-3.65015	0.000262083	0.000722141	13.8678
66205	83.6279	-3.79087	0.586397	-6.46469	1.01507e-10	6.88044e-10	13.841
623121	1.22677	-3.78864	2.36067	-1.6049	0.108517	0.163872	13.8196
780956	1.22677	-3.78864	2.36067	-1.6049	0.108517	0.163872	13.8196
668582	1.22677	-3.78864	2.36067	-1.6049	0.108517	0.163872	13.8196
232972	1.22677	-3.78864	2.36067	-1.6049	0.108517	0.163872	13.8196
23993	1.22677	-3.78864	2.36067	-1.6049	0.108517	0.163872	13.8196
71854	1.22677	-3.78864	2.36067	-1.6049	0.108517	0.163872	13.8196
12038	220.765	-3.78434	0.907582	-4.1697	3.05003e-05	9.80471e-05	13.7785
80888	38.303	-3.78169	1.00318	-3.7697	0.000163446	0.00046655	13.7531
271970	1.93021	-3.77941	2.07621	-1.82035	0.0687063	0.110585	13.7315
27055	877.441	-3.7724	0.468289	-8.05572	7.90133e-16	9.06271e-15	13.6649
14255	15.9497	-3.77094	1.1715	-3.21888	0.0012869	0.00313037	13.651
231842	102.775	-3.7706	0.85596	-4.40511	1.05729e-05	3.65061e-05	13.6478
63959	395.768	-3.76764	0.381905	-9.86539	5.88065e-23	1.21598e-21	13.6199
381413	668.322	-3.76723	0.668694	-5.63371	1.76373e-08	9.05166e-08	13.616
15227	5.76588	-3.76601	1.59737	-2.35763	0.018392	0.034395	13.6045
229534	933.353	-3.76548	0.766381	-4.91332	8.95472e-07	3.63884e-06	13.5995
627782	27.8495	-3.76296	1.18419	-3.17766	0.00148468	0.0035528	13.5757
18049	4.99478	-3.7614	1.61873	-2.32368	0.0201429	0.0373196	13.5611
13609	462.121	-3.76095	0.477458	-7.87703	3.35256e-15	3.58161e-14	13.5568
791288	1.1888	-3.7586	2.36083	-1.59207	0.11137	0.16767	13.5348
100504501	4.24047	-3.75707	1.3427	-2.79814	0.00513972	0.0110004	13.5205
54610	921.431	-3.75636	0.874221	-4.2968	1.73279e-05	5.79109e-05	13.5137
19027	1334.36	-3.75116	0.310252	-12.0907	1.18305e-33	4.87405e-32	13.4651
109232	5117.81	-3.75089	0.54225	-6.91727	4.60443e-12	3.62765e-11	13.4626
19133	4.8269	-3.74924	1.53249	-2.44651	0.0144247	0.0277239	13.4473
11534	595.779	-3.74709	0.331295	-11.3104	1.16513e-29	3.75134e-28	13.4272
18073	2172.9	-3.74698	0.72057	-5.20003	1.99261e-07	8.86591e-07	13.4262
22262	1.76965	-3.74569	2.34495	-1.59734	0.110189	0.166076	13.4142
70691	1.76965	-3.74569	2.34495	-1.59734	0.110189	0.166076	13.4142
545750	2.97849	-3.74444	1.70325	-2.19841	0.02792	0.0499627	13.4026
66845	960.148	-3.74428	0.319035	-11.7363	8.3072e-32	3.05331e-30	13.4011
18671	32.5849	-3.74324	0.69462	-5.38891	7.0888e-08	3.35293e-07	13.3915
12512	624.293	-3.74285	0.673273	-5.55919	2.71036e-08	1.35776e-07	13.3878
23795	2.1681	-3.74282	1.68682	-2.21886	0.0264965	0.047734	13.3875
59031	848.591	-3.74169	0.919165	-4.07075	4.68619e-05	0.000146392	13.3771
94353	492.073	-3.74121	0.532878	-7.02077	2.20653e-12	1.79821e-11	13.3726
100503915	22.0469	-3.74113	0.876723	-4.26717	1.9797e-05	6.56394e-05	13.3718
20446	65.9067	-3.73761	1.0309	-3.62556	0.000288338	0.00078943	13.3392
16169	27.3641	-3.73606	0.787885	-4.74189	2.11733e-06	8.14848e-06	13.325
12702	590.639	-3.7349	0.775346	-4.81708	1.45676e-06	5.71387e-06	13.3143
234663	18952.7	-3.7309	0.538635	-6.92659	4.3112e-12	3.40648e-11	13.2774
595136	837.783	-3.72949	0.500166	-7.4565	8.88529e-14	8.32347e-13	13.2644
282663	1.1501	-3.72948	2.36099	-1.57962	0.114193	0.171117	13.2644
100042802	1.1501	-3.72948	2.36099	-1.57962	0.114193	0.171117	13.2644
59310	1.1501	-3.72948	2.36099	-1.57962	0.114193	0.171117	13.2644
100303645	1.1501	-3.72948	2.36099	-1.57962	0.114193	0.171117	13.2644
217212	11.7319	-3.72807	1.07793	-3.45854	0.000543116	0.00141791	13.2514
21351	9981.39	-3.72671	0.249699	-14.9248	2.27411e-50	2.43107e-48	13.2389
11501	1279.09	-3.72442	1.1001	-3.38552	0.000710432	0.00181531	13.2178
69729	1.87502	-3.72271	2.10272	-1.77042	0.0766568	0.121622	13.2022
74635	1.15377	-3.71981	2.36105	-1.57549	0.115143	0.172382	13.1757
432950	1.11226	-3.71954	2.02474	-1.83705	0.0662027	0.107145	13.1733
17751	322.618	-3.71874	0.505937	-7.35022	1.97887e-13	1.80014e-12	13.166
54135	98.5337	-3.71684	0.619768	-5.99715	2.00816e-09	1.16432e-08	13.1486
71452	2478.27	-3.71682	0.495148	-7.50648	6.0739e-14	5.80624e-13	13.1484
332934	4.64734	-3.71535	1.66832	-2.227	0.0259471	0.0468526	13.135
78650	1.33808	-3.71374	1.70983	-2.172	0.0298559	0.0529923	13.1204
16173	106.483	-3.70943	0.476807	-7.77975	7.26698e-15	7.5227e-14	13.0813
207474	50.0991	-3.70918	0.77594	-4.78024	1.75084e-06	6.80855e-06	13.079
19363	61.6247	-3.70893	0.915482	-4.05134	5.09245e-05	0.00015817	13.0768
74931	13.3417	-3.70814	0.930766	-3.98397	6.77731e-05	0.000206633	13.0696
100502849	62.032	-3.70548	0.655571	-5.65229	1.58325e-08	8.17155e-08	13.0455
319551	14.6872	-3.70502	1.46543	-2.52828	0.0114622	0.022601	13.0414
101835	39.8316	-3.70401	0.717262	-5.1641	2.41597e-07	1.06025e-06	13.0322
27060	520.307	-3.70151	0.871464	-4.24746	2.16211e-05	7.11394e-05	13.0096
100862085	2.03741	-3.70063	1.69652	-2.18131	0.0291604	0.0519258	13.0017
13595	1099.72	-3.69981	0.431412	-8.57605	9.81898e-18	1.33833e-16	12.9944
68285	324.575	-3.69891	0.656423	-5.63495	1.75105e-08	8.98939e-08	12.9863
100123473	1.11213	-3.69751	2.36117	-1.56596	0.117357	0.175168	12.9736
18188	12.6424	-3.69609	1.06864	-3.45868	0.000542836	0.0014174	12.9609
11799	229.591	-3.69421	1.02871	-3.59113	0.000329251	0.000890943	12.944
246228	441.191	-3.68862	0.721986	-5.10899	3.23891e-07	1.39409e-06	12.8939
328643	2615.63	-3.68811	0.857903	-4.29899	1.71582e-05	5.73904e-05	12.8894
332221	1.69402	-3.68655	2.35325	-1.56658	0.117213	0.174985	12.8754
13041	58.0496	-3.68623	0.997926	-3.69389	0.000220852	0.000616741	12.8726
17720	90.5062	-3.68306	0.729916	-5.04586	4.51478e-07	1.90123e-06	12.8443
14261	18.3168	-3.68232	1.20483	-3.05629	0.00224092	0.00517617	12.8377
13849	140.647	-3.67846	0.653195	-5.63149	1.7866e-08	9.16036e-08	12.8035
78460	6.72248	-3.67703	1.46595	-2.50829	0.0121318	0.0237946	12.7908
14658	730.829	-3.67288	0.474269	-7.74431	9.61008e-15	9.84236e-14	12.7541
23991	532.413	-3.6708	0.397319	-9.23893	2.48975e-20	4.30469e-19	12.7356
65086	29.6889	-3.67056	0.846199	-4.33771	1.43977e-05	4.88668e-05	12.7336
545428	139.305	-3.66996	1.09401	-3.3546	0.000794793	0.00201389	12.7282
22236	1.07342	-3.66656	2.36135	-1.55274	0.120485	0.178971	12.6983
16429	1.07342	-3.66656	2.36135	-1.55274	0.120485	0.178971	12.6983
382696	1.07342	-3.66656	2.36135	-1.55274	0.120485	0.178971	12.6983
319293	1.07342	-3.66656	2.36135	-1.55274	0.120485	0.178971	12.6983
332713	1.07342	-3.66656	2.36135	-1.55274	0.120485	0.178971	12.6983
387512	1.07342	-3.66656	2.36135	-1.55274	0.120485	0.178971	12.6983
100504026	1.07342	-3.66656	2.36135	-1.55274	0.120485	0.178971	12.6983
257978	1.07342	-3.66656	2.36135	-1.55274	0.120485	0.178971	12.6983
72265	1039.75	-3.66507	0.286551	-12.7903	1.85863e-37	9.68144e-36	12.6851
14863	13.5933	-3.66161	1.23803	-2.95762	0.00310026	0.00696919	12.6548
12503	17.4518	-3.66012	1.18469	-3.08952	0.0020048	0.00467634	12.6417
74364	54.8953	-3.65965	0.642037	-5.70006	1.19762e-08	6.27026e-08	12.6376
12495	271.2	-3.65956	0.672179	-5.44432	5.20032e-08	2.50166e-07	12.6368
668253	67.5475	-3.6589	0.941703	-3.88541	0.000102159	0.000302099	12.631
212733	11.5389	-3.65876	0.943532	-3.87772	0.000105438	0.000311065	12.6298
777656	1.07637	-3.65779	2.3614	-1.54899	0.121383	0.180207	12.6213
83436	546.702	-3.65683	0.981547	-3.72558	0.000194864	0.000548854	12.613
170706	11.5826	-3.65617	1.04251	-3.50709	0.000453039	0.00119882	12.6072
100504577	2.64607	-3.65507	2.07932	-1.75782	0.0787781	0.12448	12.5976
12068	578.043	-3.65281	0.440372	-8.29483	1.08737e-16	1.36075e-15	12.5779
13653	5118.18	-3.65137	0.680637	-5.36464	8.11105e-08	3.80307e-07	12.5653
56363	3477.38	-3.65123	0.481594	-7.58156	3.41413e-14	3.32985e-13	12.5641
100503890	894.958	-3.64769	0.424311	-8.59673	8.20163e-18	1.12917e-16	12.5332
67052	159.145	-3.64682	0.983199	-3.70913	0.000207969	0.000583154	12.5257
100217422	3.55708	-3.64595	1.48143	-2.4611	0.0138513	0.0267601	12.5182
100101484	3.79028	-3.64498	1.63358	-2.23128	0.0256626	0.046398	12.5097
238673	148.822	-3.64491	0.460725	-7.91126	2.54805e-15	2.74544e-14	12.5092
24017	1490.36	-3.64304	0.235656	-15.4591	6.54661e-54	8.11185e-52	12.4929
109672	2413.36	-3.6395	0.439136	-8.28786	1.15309e-16	1.44079e-15	12.4623
225742	276.99	-3.63671	1.03399	-3.51716	0.000436189	0.00115648	12.4383
14619	32.2493	-3.63662	0.838576	-4.33666	1.44663e-05	4.90893e-05	12.4375
12797	18.5206	-3.63577	0.735383	-4.94405	7.6518e-07	3.14139e-06	12.4301
19242	3984.09	-3.63535	0.512763	-7.08973	1.3437e-12	1.12359e-11	12.4265
74646	546.886	-3.63472	0.570517	-6.37092	1.87897e-10	1.23127e-09	12.4211
72562	123.124	-3.63408	0.448439	-8.10384	5.32518e-16	6.20803e-15	12.4156
12351	50.7151	-3.63312	1.07641	-3.37521	0.000737603	0.00187827	12.4073
18300	2.7657	-3.63302	2.31616	-1.56856	0.116751	0.174439	12.4065
212070	1.03545	-3.63237	2.36155	-1.53813	0.124017	0.1836	12.4009
110175	316.115	-3.63123	0.551809	-6.58059	4.68597e-11	3.31417e-10	12.391
66520	668.702	-3.63054	0.382113	-9.50122	2.07448e-21	3.86449e-20	12.3852
67861	61.7381	-3.62966	0.314088	-11.5562	6.87018e-31	2.36565e-29	12.3776
225115	698.271	-3.62768	0.943038	-3.84681	0.000119668	0.000349266	12.3607
368202	2.78007	-3.62686	2.0801	-1.7436	0.0812289	0.12781	12.3536
326619	1.04414	-3.62686	2.0362	-1.78119	0.0748816	0.119117	12.3536
14526	4.75665	-3.62591	1.62281	-2.23434	0.0254607	0.0460811	12.3454
245600	2.39384	-3.6253	1.63834	-2.21278	0.0269126	0.0483769	12.3403
100503309	1.03633	-3.62441	2.03858	-1.77791	0.0754192	0.119856	12.3326
100039988	1.2587	-3.61946	1.73886	-2.08151	0.037387	0.0646749	12.2904
22097	1.67275	-3.61897	2.10164	-1.72197	0.0850745	0.13299	12.2862
66152	2421.31	-3.61769	0.495048	-7.30776	2.71638e-13	2.43982e-12	12.2753
100040667	1.68731	-3.61585	2.0996	-1.72216	0.085041	0.132951	12.2597
67705	2358.38	-3.61535	0.49015	-7.376	1.63112e-13	1.49879e-12	12.2554
72792	41.14	-3.61335	0.7393	-4.88752	1.02112e-06	4.1096e-06	12.2384
99543	318.191	-3.61318	0.517305	-6.98462	2.85634e-12	2.3048e-11	12.237
236539	996.468	-3.6111	0.5499	-6.56684	5.13957e-11	3.6002e-10	12.2194
71339	15.0108	-3.61064	0.745815	-4.8412	1.2906e-06	5.10252e-06	12.2155
16423	2610.12	-3.6093	0.4315	-8.36453	6.03547e-17	7.71823e-16	12.2041
58805	40.4384	-3.60814	0.980031	-3.68166	0.000231721	0.000644124	12.1943
436090	335.734	-3.6004	0.600479	-5.99588	2.02392e-09	1.17262e-08	12.1291
394435	0.99675	-3.59935	2.36175	-1.52402	0.127504	0.187912	12.1203
100504464	0.99675	-3.59935	2.36175	-1.52402	0.127504	0.187912	12.1203
668577	0.99675	-3.59935	2.36175	-1.52402	0.127504	0.187912	12.1203
404743	0.99675	-3.59935	2.36175	-1.52402	0.127504	0.187912	12.1203
78753	0.99675	-3.59935	2.36175	-1.52402	0.127504	0.187912	12.1203
77543	0.99675	-3.59935	2.36175	-1.52402	0.127504	0.187912	12.1203
233544	0.99675	-3.59935	2.36175	-1.52402	0.127504	0.187912	12.1203
76679	0.99675	-3.59935	2.36175	-1.52402	0.127504	0.187912	12.1203
75616	906.347	-3.59735	0.399974	-8.99396	2.38484e-19	3.80922e-18	12.1035
27357	787.429	-3.593	0.270936	-13.2615	3.87258e-40	2.34592e-38	12.0671
114663	71.5407	-3.58967	0.964556	-3.72157	0.000197986	0.000556976	12.0392
16142	0.999693	-3.5893	2.36181	-1.51973	0.12858	0.189311	12.0361
58869	805.434	-3.58813	0.590796	-6.07339	1.2524e-09	7.44339e-09	12.0264
330890	7.31749	-3.58255	1.62778	-2.20087	0.027745	0.0496932	11.9799
30963	444.15	-3.57973	0.572305	-6.25492	3.97714e-10	2.51159e-09	11.9565
11974	902.916	-3.57804	0.397766	-8.99533	2.35534e-19	3.76578e-18	11.9425
239559	14.4258	-3.57298	1.06821	-3.34484	0.000823287	0.00207868	11.9008
27278	16.2989	-3.56994	1.55108	-2.30158	0.0213588	0.0393406	11.8757
97440	85.7558	-3.56987	0.515037	-6.9313	4.17004e-12	3.29972e-11	11.8751
236900	903.723	-3.56906	0.279964	-12.7483	3.18723e-37	1.63932e-35	11.8684
666513	5.20256	-3.56889	1.02239	-3.49074	0.000481693	0.0012691	11.867
78329	29.2775	-3.56729	0.645583	-5.52569	3.28191e-08	1.62418e-07	11.8539
97031	1163.69	-3.56613	0.51132	-6.97435	3.07285e-12	2.4734e-11	11.8443
239760	83.7375	-3.56534	0.581564	-6.13061	8.75443e-10	5.28562e-09	11.8379
666737	68.418	-3.56529	0.903949	-3.94412	8.00923e-05	0.00024094	11.8375
76376	137.676	-3.56435	0.491624	-7.25016	4.1627e-13	3.66443e-12	11.8298
14862	239.965	-3.56354	0.454345	-7.84325	4.39026e-15	4.65675e-14	11.8232
66147	1272.52	-3.56068	0.296792	-11.9972	3.67396e-33	1.44798e-31	11.7997
70652	57.4706	-3.55846	0.776946	-4.58005	4.6486e-06	1.70019e-05	11.7815
277468	70.7069	-3.55826	0.958192	-3.71351	0.000204401	0.000574134	11.7799
100503571	5.14043	-3.55193	1.67973	-2.11458	0.0344657	0.0602074	11.7284
320736	75.1514	-3.54894	0.707831	-5.01382	5.3359e-07	2.22694e-06	11.7041
27371	11.8016	-3.54736	1.18286	-2.99897	0.00270892	0.00617005	11.6913
93960	1137.33	-3.54516	0.520727	-6.80809	9.89009e-12	7.49594e-11	11.6734
19143	22.5295	-3.54385	0.723728	-4.89665	9.74823e-07	3.93296e-06	11.6628
72315	178.437	-3.54301	0.751762	-4.71294	2.44165e-06	9.31334e-06	11.6561
69387	20.6156	-3.54227	1.20411	-2.94181	0.00326299	0.00728791	11.6501
18407	2.04707	-3.54054	2.3396	-1.51331	0.130202	0.191457	11.6361
20615	2203.95	-3.5392	0.469757	-7.53412	4.91645e-14	4.74976e-13	11.6253
73906	6.11792	-3.53843	1.08933	-3.24825	0.00116119	0.00285086	11.6191
69186	2013.17	-3.53667	0.498513	-7.09444	1.29878e-12	1.08826e-11	11.605
67484	145.633	-3.53395	0.918926	-3.84574	0.00012019	0.000350386	11.5831
54204	224.635	-3.53143	0.632477	-5.5835	2.3573e-08	1.19e-07	11.5629
229595	147.546	-3.53132	1.04785	-3.37006	0.000751531	0.00190989	11.562
330260	534.481	-3.53072	0.410107	-8.60929	7.35166e-18	1.01557e-16	11.5572
76220	202.434	-3.52743	0.873114	-4.04006	5.34374e-05	0.000165284	11.5309
100862182	0.920077	-3.5272	2.3622	-1.49319	0.135388	0.197733	11.5291
11634	0.920077	-3.5272	2.3622	-1.49319	0.135388	0.197733	11.5291
780931	0.920077	-3.5272	2.3622	-1.49319	0.135388	0.197733	11.5291
780932	0.920077	-3.5272	2.3622	-1.49319	0.135388	0.197733	11.5291
100775172	0.920077	-3.5272	2.3622	-1.49319	0.135388	0.197733	11.5291
13035	0.920077	-3.5272	2.3622	-1.49319	0.135388	0.197733	11.5291
77055	0.920077	-3.5272	2.3622	-1.49319	0.135388	0.197733	11.5291
100043332	0.920077	-3.5272	2.3622	-1.49319	0.135388	0.197733	11.5291
171168	0.920077	-3.5272	2.3622	-1.49319	0.135388	0.197733	11.5291
436522	0.920077	-3.5272	2.3622	-1.49319	0.135388	0.197733	11.5291
381959	0.920077	-3.5272	2.3622	-1.49319	0.135388	0.197733	11.5291
100042856	0.920077	-3.5272	2.3622	-1.49319	0.135388	0.197733	11.5291
71860	22.0128	-3.52461	1.3328	-2.64451	0.0081809	0.0166883	11.5083
67138	34.7107	-3.52425	1.24641	-2.82753	0.00469091	0.010142	11.5055
232408	6.20328	-3.52311	1.40902	-2.5004	0.0124052	0.0242644	11.4964
100504668	46.1449	-3.5205	0.668361	-5.26736	1.38403e-07	6.28112e-07	11.4756
16992	23.9851	-3.52047	1.43864	-2.44708	0.0144018	0.0276831	11.4754
68728	27859.8	-3.52041	0.529047	-6.65425	2.84758e-11	2.06633e-10	11.4749
71406	2.22894	-3.52	2.33646	-1.50655	0.131926	0.193593	11.4716
667035	13.7083	-3.51925	0.891468	-3.9477	7.89042e-05	0.000237672	11.4657
58233	313.232	-3.51863	0.560924	-6.27292	3.54329e-10	2.25414e-09	11.4608
215384	0.922284	-3.51852	2.36225	-1.48948	0.136361	0.199012	11.4599
22117	104.331	-3.5175	0.453652	-7.75374	8.92261e-15	9.17273e-14	11.4518
100504287	0.92302	-3.51558	2.36227	-1.48822	0.136693	0.199371	11.4366
100038752	0.92302	-3.51558	2.36227	-1.48822	0.136693	0.199371	11.4366
227659	363.131	-3.51221	0.610095	-5.75682	8.57129e-09	4.55465e-08	11.4098
19317	12924.8	-3.51015	0.474996	-7.38985	1.47e-13	1.35455e-12	11.3936
13167	3606.29	-3.50889	0.42894	-8.18038	2.82948e-16	3.39538e-15	11.3837
11848	4787.76	-3.50194	0.204585	-17.1173	1.10241e-65	1.98143e-63	11.329
74318	1040.93	-3.501	0.537453	-6.51404	7.3154e-11	5.03755e-10	11.3215
211286	522.762	-3.49884	0.352964	-9.91275	3.66403e-23	7.67334e-22	11.3046
67695	698.236	-3.49483	0.324772	-10.7609	5.26678e-27	1.43812e-25	11.2733
231440	127.925	-3.4945	0.739223	-4.72726	2.27572e-06	8.71703e-06	11.2706
228961	584.512	-3.4935	0.315555	-11.071	1.73503e-28	5.19746e-27	11.2628
110606	2609.22	-3.49257	0.571941	-6.10651	1.01834e-09	6.10331e-09	11.2556
68283	220.354	-3.49202	0.576533	-6.05693	1.38742e-09	8.21901e-09	11.2513
208449	797.462	-3.48909	0.647706	-5.38684	7.17065e-08	3.38773e-07	11.2285
18689	10.7852	-3.48756	0.912681	-3.82122	0.000132794	0.000384625	11.2165
384622	0.882108	-3.48749	2.36246	-1.47622	0.139886	0.203303	11.2161
20493	6.3804	-3.48604	1.13491	-3.07164	0.00212884	0.00493891	11.2048
67469	761.785	-3.48484	0.286376	-12.1687	4.56091e-34	1.94266e-32	11.1954
73474	43.1404	-3.48341	0.834522	-4.17413	2.99123e-05	9.62323e-05	11.1843
81535	665.105	-3.48287	0.246717	-14.1169	2.98989e-45	2.45742e-43	11.1801
407243	2037.79	-3.48193	0.446287	-7.80199	6.09383e-15	6.34441e-14	11.1729
58206	34.7177	-3.48058	0.841468	-4.13632	3.52927e-05	0.000112436	11.1624
21846	128.361	-3.48026	1.08197	-3.21658	0.00129728	0.00315186	11.1599
107373	486.39	-3.47939	0.937904	-3.70975	0.000207466	0.000581945	11.1532
76108	3777.19	-3.47808	0.432099	-8.04928	8.32823e-16	9.50569e-15	11.1431
212285	230.008	-3.4771	0.545176	-6.37793	1.79496e-10	1.17811e-09	11.1355
100039731	7.61831	-3.47571	1.71395	-2.0279	0.0425704	0.0725822	11.1248
100861721	25.8872	-3.47397	0.809064	-4.29381	1.75633e-05	5.86136e-05	11.1114
73824	618.273	-3.47366	0.527405	-6.58632	4.50851e-11	3.20058e-10	11.109
16190	320.826	-3.47168	0.63385	-5.47714	4.32256e-08	2.10416e-07	11.0938
52700	2262.51	-3.47077	0.497264	-6.97973	2.95755e-12	2.38294e-11	11.0868
12870	60.8634	-3.4673	0.898104	-3.86069	0.000113067	0.000331242	11.0602
231148	478.776	-3.46708	0.636806	-5.44448	5.19567e-08	2.50016e-07	11.0585
22146	115.523	-3.4664	0.580354	-5.97291	2.33063e-09	1.33941e-08	11.0533
13710	6.46419	-3.46639	1.34369	-2.57975	0.00988716	0.0197431	11.0532
100526527	0.927721	-3.46578	2.07342	-1.67153	0.0946177	0.145804	11.0485
75572	196.243	-3.46411	0.585159	-5.91995	3.22048e-09	1.82012e-08	11.0357
19766	386.424	-3.46229	0.783412	-4.4195	9.89287e-06	3.43249e-05	11.0218
19419	29.7944	-3.45997	0.938155	-3.68806	0.000225969	0.000629419	11.0041
19285	123.251	-3.45936	0.742916	-4.65646	3.2169e-06	1.2054e-05	10.9995
30953	147.89	-3.45918	0.668237	-5.17658	2.25985e-07	9.96095e-07	10.9981
70083	1963.63	-3.45822	0.643561	-5.37358	7.71896e-08	3.62478e-07	10.9908
74685	13.541	-3.45819	1.07815	-3.20752	0.00133885	0.00324275	10.9905
27384	68.5193	-3.45658	0.753269	-4.58877	4.45858e-06	1.63508e-05	10.9783
71998	32.2111	-3.45577	0.794942	-4.3472	1.37888e-05	4.69168e-05	10.9721
16548	155.157	-3.45517	0.450491	-7.66979	1.7228e-14	1.72238e-13	10.9676
252864	888.004	-3.45123	0.435678	-7.92152	2.34622e-15	2.53634e-14	10.9377
100039796	0.843404	-3.44932	2.36271	-1.4599	0.144317	0.208908	10.9232
100038854	0.843404	-3.44932	2.36271	-1.4599	0.144317	0.208908	10.9232
100628585	0.843404	-3.44932	2.36271	-1.4599	0.144317	0.208908	10.9232
71619	0.843404	-3.44932	2.36271	-1.4599	0.144317	0.208908	10.9232
70809	0.843404	-3.44932	2.36271	-1.4599	0.144317	0.208908	10.9232
100502618	0.843404	-3.44932	2.36271	-1.4599	0.144317	0.208908	10.9232
73567	0.843404	-3.44932	2.36271	-1.4599	0.144317	0.208908	10.9232
68041	3020.73	-3.44885	0.418906	-8.23298	1.82611e-16	2.23227e-15	10.9196
218865	40.1654	-3.44825	1.17171	-2.94292	0.00325138	0.00726595	10.9151
18686	6.42348	-3.44804	1.71207	-2.01396	0.0440142	0.074841	10.9135
100040416	4.42918	-3.44789	1.21757	-2.83179	0.00462887	0.0100198	10.9123
12737	208.719	-3.44702	0.95903	-3.59428	0.000325295	0.000881174	10.9057
268729	5.72629	-3.44552	1.54198	-2.23447	0.0254519	0.0460753	10.8944
212892	24.1438	-3.44352	0.855834	-4.02358	5.732e-05	0.000176625	10.8793
74257	1528.11	-3.44315	0.629687	-5.46803	4.55058e-08	2.20531e-07	10.8765
17913	556.61	-3.4425	0.822639	-4.1847	2.85543e-05	9.22445e-05	10.8716
777654	0.845611	-3.43919	2.36278	-1.45557	0.145512	0.210414	10.8467
107351	960.711	-3.43484	0.655208	-5.24236	1.58539e-07	7.13362e-07	10.8141
16783	11129.7	-3.43435	0.300552	-11.4268	3.07167e-30	1.02531e-28	10.8104
213783	346.022	-3.4331	0.759665	-4.51923	6.20658e-06	2.21939e-05	10.801
241112	13.0762	-3.42941	1.22959	-2.78907	0.00528604	0.0112826	10.7734
78748	123.706	-3.42809	0.910003	-3.76712	0.00016514	0.000470891	10.7636
24136	2373.47	-3.42709	0.354074	-9.67901	3.7027e-22	7.18402e-21	10.7562
71099	28.1888	-3.42152	1.0693	-3.19977	0.00137538	0.00332139	10.7147
69187	9.765	-3.41962	0.844035	-4.05152	5.08861e-05	0.00015808	10.7006
21648	91.7872	-3.41864	0.424823	-8.04721	8.47049e-16	9.64786e-15	10.6933
20708	0.967161	-3.41493	2.1519	-1.58694	0.112526	0.169036	10.6659
66599	81.6117	-3.41427	0.514962	-6.63015	3.35353e-11	2.41206e-10	10.661
71819	355.661	-3.41098	0.991862	-3.43896	0.000583947	0.0015166	10.6367
74185	367.625	-3.40529	0.565995	-6.01648	1.78252e-09	1.04087e-08	10.5949
98878	407.297	-3.40402	0.786253	-4.32942	1.49501e-05	5.06261e-05	10.5855
78491	12.2895	-3.40401	0.993935	-3.42478	0.000615289	0.00159034	10.5855
18643	12207.7	-3.40137	0.392913	-8.65679	4.85238e-18	6.84775e-17	10.5661
216169	4340.8	-3.39862	0.516336	-6.58219	4.63566e-11	3.28371e-10	10.546
66447	2617.61	-3.39788	0.622172	-5.46133	4.72589e-08	2.28486e-07	10.5406
270106	790.515	-3.39652	0.443094	-7.66546	1.78193e-14	1.77715e-13	10.5306
12861	9224.34	-3.39526	0.567212	-5.98587	2.15232e-09	1.24218e-08	10.5214
11758	4140.8	-3.39509	0.289264	-11.737	8.23849e-32	3.03488e-30	10.5202
73811	0.807642	-3.39505	2.36309	-1.4367	0.150803	0.216838	10.5199
73480	0.807642	-3.39505	2.36309	-1.4367	0.150803	0.216838	10.5199
16770	0.807642	-3.39505	2.36309	-1.4367	0.150803	0.216838	10.5199
19226	0.807642	-3.39505	2.36309	-1.4367	0.150803	0.216838	10.5199
100040635	0.807642	-3.39505	2.36309	-1.4367	0.150803	0.216838	10.5199
100047133	36.9786	-3.39415	0.934191	-3.63325	0.000279876	0.000767648	10.5133
18718	2812.93	-3.39372	0.313355	-10.8302	2.475e-27	6.86121e-26	10.5102
15160	19.9957	-3.3933	0.997	-3.40351	0.00066527	0.00170765	10.5071
70962	1.90548	-3.39212	2.35172	-1.4424	0.14919	0.214984	10.4986
320642	66.8517	-3.39115	0.732985	-4.62649	3.71919e-06	1.38001e-05	10.4915
13361	327.812	-3.38815	0.608212	-5.57068	2.53743e-08	1.2766e-07	10.4697
69941	18.7359	-3.38427	0.691241	-4.89594	9.78383e-07	3.94635e-06	10.4416
319158	18.3418	-3.37929	0.648209	-5.21327	1.8554e-07	8.28019e-07	10.4056
76987	2231.79	-3.37885	0.492753	-6.85709	7.02757e-12	5.40654e-11	10.4025
58809	165.456	-3.3774	0.658265	-5.13076	2.88572e-07	1.24997e-06	10.392
109050	71.7023	-3.37634	0.866404	-3.89696	9.74086e-05	0.00028915	10.3843
73873	192.934	-3.37608	0.752141	-4.48862	7.16848e-06	2.54113e-05	10.3825
22153	36151.5	-3.37413	0.494807	-6.81907	9.16286e-12	6.96411e-11	10.3685
72560	25.0956	-3.37348	0.949949	-3.55123	0.000383436	0.00102576	10.3638
100125262	1.70853	-3.37343	2.33376	-1.44549	0.148319	0.213831	10.3634
17454	152.055	-3.37193	0.955307	-3.52968	0.000416064	0.00110635	10.3526
14412	92.5381	-3.36799	0.858492	-3.92315	8.7399e-05	0.00026143	10.3245
100041694	1.21838	-3.36677	2.36071	-1.42617	0.15382	0.22044	10.3157
17524	459.047	-3.36585	0.844854	-3.98394	6.77806e-05	0.000206633	10.3091
231821	2945.67	-3.36545	0.41234	-8.16184	3.29971e-16	3.93367e-15	10.3063
59047	1668.33	-3.36529	0.702037	-4.79361	1.6381e-06	6.39294e-06	10.3051
218734	315.483	-3.36495	0.468474	-7.18279	6.83027e-13	5.90777e-12	10.3027
19171	598.903	-3.36488	0.392739	-8.56774	1.05532e-17	1.43482e-16	10.3022
100503045	0.766731	-3.3647	2.36331	-1.42373	0.154526	0.22118	10.3009
634346	0.766731	-3.3647	2.36331	-1.42373	0.154526	0.22118	10.3009
17228	0.766731	-3.3647	2.36331	-1.42373	0.154526	0.22118	10.3009
19074	0.766731	-3.3647	2.36331	-1.42373	0.154526	0.22118	10.3009
20761	0.766731	-3.3647	2.36331	-1.42373	0.154526	0.22118	10.3009
16641	0.766731	-3.3647	2.36331	-1.42373	0.154526	0.22118	10.3009
70080	0.766731	-3.3647	2.36331	-1.42373	0.154526	0.22118	10.3009
434410	0.766731	-3.3647	2.36331	-1.42373	0.154526	0.22118	10.3009
12046	0.766731	-3.3647	2.36331	-1.42373	0.154526	0.22118	10.3009
75458	169.066	-3.35614	0.724295	-4.63367	3.5924e-06	1.336e-05	10.24
71988	78.2324	-3.3534	1.12549	-2.97951	0.00288711	0.00653134	10.2206
66824	87.1945	-3.35275	0.936093	-3.58164	0.000341444	0.000921104	10.2159
12856	547.504	-3.3527	0.414688	-8.08488	6.2225e-16	7.20787e-15	10.2156
211945	1476.11	-3.35198	0.50063	-6.69553	2.14891e-11	1.57754e-10	10.2105
17155	259.366	-3.3502	0.403699	-8.29874	1.05223e-16	1.3198e-15	10.1979
52665	214.522	-3.34885	0.517801	-6.46744	9.96748e-11	6.76185e-10	10.1884
100678	620.227	-3.34792	0.516085	-6.48714	8.74801e-11	5.97671e-10	10.1818
67426	97.8695	-3.34691	0.417126	-8.02372	1.02589e-15	1.1572e-14	10.1746
27984	741.117	-3.3466	0.650743	-5.14274	2.70761e-07	1.18001e-06	10.1725
76574	723.332	-3.34381	0.531409	-6.29235	3.12692e-10	1.99859e-09	10.1529
11671	1206.26	-3.34246	0.343966	-9.71743	2.54114e-22	5.01363e-21	10.1434
219140	1549	-3.34195	0.549152	-6.08566	1.16014e-09	6.92021e-09	10.1398
414124	1.8288	-3.34177	2.35711	-1.41774	0.156266	0.223436	10.1385
69491	1.74553	-3.34027	2.35796	-1.41659	0.156602	0.223838	10.1279
20747	8262.41	-3.33748	0.413126	-8.0786	6.55129e-16	7.56195e-15	10.1084
70832	15.4764	-3.33731	0.864583	-3.86003	0.000113375	0.000332025	10.1072
11768	6.15539	-3.33215	1.23075	-2.70742	0.00678089	0.0141176	10.0711
666060	162.351	-3.32986	0.670014	-4.96983	6.70104e-07	2.76773e-06	10.0551
105844	133.238	-3.32749	0.782777	-4.25088	2.12931e-05	7.02017e-05	10.0386
19883	49.4204	-3.32444	0.651131	-5.10564	3.2968e-07	1.41603e-06	10.0174
433182	70.4116	-3.32238	0.739798	-4.49093	7.0912e-06	2.51591e-05	10.0031
21940	9.70493	-3.32222	1.07233	-3.09813	0.00194743	0.00455032	10.002
353156	170.58	-3.31355	0.734988	-4.50831	6.5347e-06	2.32908e-05	9.94209
21814	270.185	-3.31292	0.751163	-4.41039	1.03186e-05	3.5681e-05	9.93776
13805	154.811	-3.3123	0.702647	-4.71403	2.4287e-06	9.27258e-06	9.93346
56458	201.837	-3.31199	0.375731	-8.81478	1.19921e-18	1.79947e-17	9.93134
328417	71.6938	-3.31163	1.17843	-2.8102	0.00495106	0.0106426	9.92889
320312	51.128	-3.31145	0.436275	-7.59028	3.19214e-14	3.11892e-13	9.92763
20341	37.1896	-3.30783	0.802441	-4.1222	3.75265e-05	0.00011906	9.90272
74211	201.075	-3.30551	0.836046	-3.95374	7.69386e-05	0.000232264	9.88685
72040	8.25473	-3.30467	1.37622	-2.40126	0.0163387	0.0309982	9.88108
100043513	1.15627	-3.30461	2.36105	-1.39964	0.161622	0.229908	9.8807
100504740	1.15627	-3.30461	2.36105	-1.39964	0.161622	0.229908	9.8807
67356	1.1495	-3.30461	2.36105	-1.39964	0.161622	0.229908	9.8807
227326	12.236	-3.30177	0.888496	-3.71613	0.0002023	0.000568524	9.86122
68612	296.166	-3.30051	0.81599	-4.0448	5.23681e-05	0.000162284	9.85266
22272	3978.61	-3.29987	0.572879	-5.76015	8.40372e-09	4.46996e-08	9.84827
69524	152.121	-3.29478	0.827485	-3.98168	6.84289e-05	0.000208227	9.81361
60411	41.8972	-3.29369	0.901368	-3.6541	0.000258081	0.000712435	9.80618
67533	751.983	-3.29072	0.848354	-3.87895	0.00010491	0.000309562	9.78601
66733	28.7138	-3.28935	0.779684	-4.21883	2.45577e-05	8.01247e-05	9.77673
223646	71.8309	-3.28932	0.806665	-4.07768	4.54882e-05	0.000142475	9.77649
14630	574.337	-3.28834	0.332792	-9.88108	5.02864e-23	1.04642e-21	9.76989
107885	67.1619	-3.28815	0.435132	-7.55666	4.13537e-14	4.01651e-13	9.76859
56461	331.221	-3.28808	0.535749	-6.13736	8.39017e-10	5.07881e-09	9.76815
791329	3.82404	-3.28795	1.476	-2.2276	0.0259069	0.0467955	9.76721
12715	2.86899	-3.28788	2.11667	-1.55333	0.120344	0.178892	9.76676
19128	172.333	-3.28746	0.581762	-5.65087	1.59639e-08	8.23678e-08	9.76391
14368	59.1414	-3.2827	0.752519	-4.36229	1.2871e-05	4.39218e-05	9.73178
20537	1.75414	-3.28267	2.09073	-1.57011	0.11639	0.173978	9.73159
66151	1893.43	-3.28257	0.680756	-4.82194	1.42167e-06	5.58561e-06	9.73086
666468	211.223	-3.28117	0.503267	-6.51975	7.04256e-11	4.86026e-10	9.72147
14151	1198.55	-3.27906	0.409454	-8.00837	1.16241e-15	1.29955e-14	9.70724
13850	66.8723	-3.27905	0.738556	-4.43981	9.00394e-06	3.14811e-05	9.70715
14272	4552.5	-3.27889	0.468647	-6.99649	2.62446e-12	2.12398e-11	9.70607
235293	2468.82	-3.27801	0.435348	-7.52963	5.0883e-14	4.90709e-13	9.70019
668489	3.28592	-3.27306	1.49789	-2.18512	0.02888	0.0514835	9.66695
12585	2583.97	-3.27081	0.57473	-5.69103	1.26275e-08	6.59016e-08	9.65186
217149	223.31	-3.2695	0.518364	-6.30735	2.83859e-10	1.825e-09	9.64311
20619	594.044	-3.26784	0.289131	-11.3023	1.27842e-29	4.08395e-28	9.63202
105439	2052.91	-3.26699	0.571761	-5.71392	1.10404e-08	5.8063e-08	9.62638
621837	480.006	-3.26676	0.559609	-5.83757	5.29669e-09	2.91202e-08	9.62481
67885	184.2	-3.26669	0.44342	-7.36702	1.7448e-13	1.59787e-12	9.62433
338320	2.10211	-3.26224	2.00143	-1.62995	0.103111	0.156941	9.59469
16180	618.152	-3.26041	0.385077	-8.46691	2.51994e-17	3.31585e-16	9.58257
67713	406.234	-3.25992	0.431101	-7.56186	3.97339e-14	3.86378e-13	9.57932
19141	2480.72	-3.25984	0.285238	-11.4285	3.01362e-30	1.01006e-28	9.57875
19340	770.734	-3.25821	0.844298	-3.85907	0.000113819	0.000333207	9.56793
319149	4.30527	-3.25756	1.09475	-2.97561	0.00292404	0.00660756	9.56361
18854	163.017	-3.25353	0.775459	-4.19561	2.72134e-05	8.8139e-05	9.53694
14910	297.837	-3.25352	0.419863	-7.74901	9.26151e-15	9.50918e-14	9.53691
22337	5.15064	-3.25318	1.61977	-2.00843	0.0445978	0.0756997	9.53467
56327	2892.1	-3.25255	0.603476	-5.38969	7.05807e-08	3.33936e-07	9.53047
13809	16.8307	-3.25235	0.959515	-3.38957	0.000700013	0.00179121	9.52916
65971	1.30085	-3.25099	2.1654	-1.50134	0.133269	0.195283	9.52022
140795	23.2303	-3.24703	0.945002	-3.436	0.000590361	0.00153123	9.4941
621961	107.4	-3.24595	0.349984	-9.27456	1.78355e-20	3.12666e-19	9.487
13867	276.325	-3.24526	0.610417	-5.31646	1.05805e-07	4.88304e-07	9.48243
100502959	4.78991	-3.24385	1.23237	-2.6322	0.00848328	0.0172278	9.47318
100861935	0.81412	-3.24314	2.14735	-1.5103	0.130966	0.192443	9.46855
100503720	13.6474	-3.24135	1.02869	-3.15096	0.00162735	0.00386705	9.45677
252837	11.1007	-3.24126	1.0626	-3.05031	0.00228608	0.00527155	9.45621
13709	500.601	-3.24014	0.329427	-9.8357	7.90192e-23	1.62163e-21	9.44889
16332	1212.21	-3.23948	0.520493	-6.22387	4.85034e-10	3.03722e-09	9.44455
381678	177.13	-3.23898	0.430445	-7.52472	5.28344e-14	5.08928e-13	9.44125
22626	1.06187	-3.23825	2.36143	-1.37131	0.170279	0.240258	9.43647
100504109	1.06187	-3.23825	2.36143	-1.37131	0.170279	0.240258	9.43647
69513	11.9038	-3.23376	0.630467	-5.12915	2.91046e-07	1.26002e-06	9.4072
66968	22.3576	-3.23353	0.856541	-3.7751	0.000159941	0.000457342	9.40568
69327	16.173	-3.22719	0.59789	-5.39763	6.7526e-08	3.20185e-07	9.36443
380712	14.4638	-3.22693	0.905124	-3.56519	0.000363598	0.00097524	9.36276
54403	246.996	-3.22676	0.824983	-3.91131	9.17967e-05	0.000273534	9.36165
100503848	2.55292	-3.22376	1.27932	-2.5199	0.0117389	0.0230965	9.34216
21955	48.8299	-3.22364	1.18183	-2.72766	0.00637856	0.013348	9.34141
12864	3917.8	-3.22363	0.547603	-5.8868	3.93743e-09	2.20022e-08	9.34135
73183	8.42628	-3.22305	0.924632	-3.48577	0.000490732	0.00129043	9.33758
67150	232.158	-3.22292	0.456978	-7.05267	1.75513e-12	1.44707e-11	9.33674
21815	400.935	-3.22188	0.816256	-3.94714	7.90895e-05	0.000238186	9.33001
67103	105.02	-3.22146	1.00685	-3.19956	0.00137637	0.00332267	9.32733
76257	197.713	-3.2191	0.553791	-5.81284	6.14225e-09	3.33985e-08	9.31206
21838	27.2349	-3.2174	0.89094	-3.61124	0.000304738	0.000830162	9.30108
13860	265.262	-3.21644	0.874941	-3.67618	0.000236752	0.000656992	9.29491
66111	611.577	-3.21514	0.394425	-8.15145	3.59576e-16	4.26794e-15	9.28652
66460	2050.14	-3.21364	0.376257	-8.54107	1.3299e-17	1.79028e-16	9.27687
110829	1472.24	-3.20974	0.631596	-5.08196	3.73568e-07	1.5891e-06	9.25187
66711	1560.74	-3.20845	0.353882	-9.06643	1.22976e-19	2.01543e-18	9.24357
69656	13.2364	-3.20666	0.963302	-3.32882	0.000872135	0.00219154	9.23212
52076	365.51	-3.20494	0.443034	-7.23407	4.68745e-13	4.10868e-12	9.22111
100503799	5.48219	-3.20417	1.1805	-2.71424	0.0066429	0.013871	9.21617
320846	53.2431	-3.20171	0.846696	-3.78141	0.000155942	0.000447	9.20047
15360	36.4537	-3.20134	0.917164	-3.49047	0.000482169	0.00126994	9.1981
19265	55.5477	-3.2013	0.663746	-4.82308	1.41356e-06	5.56173e-06	9.19787
19261	2384.27	-3.1998	0.87979	-3.63701	0.000275823	0.000757703	9.18834
11520	958.597	-3.19753	0.840969	-3.8022	0.000143418	0.0004132	9.17388
100502619	9.08294	-3.19559	1.08868	-2.93529	0.00333236	0.0074236	9.16155
319750	2.42716	-3.19489	1.64822	-1.93839	0.0525759	0.0873204	9.15708
72674	2865.43	-3.19255	0.310741	-10.274	9.23124e-25	2.12357e-23	9.14224
237911	79.484	-3.19122	0.733464	-4.35088	1.3559e-05	4.62024e-05	9.1338
67442	91.5593	-3.19021	0.421404	-7.57042	3.72025e-14	3.61978e-13	9.12741
66383	495.951	-3.1894	0.328315	-9.71445	2.6167e-22	5.15028e-21	9.1223
71840	14.0962	-3.18912	0.99105	-3.21792	0.00129126	0.0031391	9.12052
100503066	17.8386	-3.18879	0.620139	-5.14206	2.71738e-07	1.18332e-06	9.11847
19024	170.918	-3.18745	0.593049	-5.37469	7.67161e-08	3.60359e-07	9.11002
104923	903.98	-3.18704	0.468655	-6.80038	1.0434e-11	7.88993e-11	9.10738
13139	413.32	-3.18329	0.392271	-8.11503	4.85654e-16	5.69416e-15	9.08379
28146	2826.85	-3.18218	0.268424	-11.8551	2.02584e-32	7.65234e-31	9.07675
75495	7.32578	-3.18095	0.994193	-3.19953	0.00137652	0.00332267	9.06904
319939	958.494	-3.17876	0.549018	-5.78991	7.04249e-09	3.80406e-08	9.05529
17991	2198.07	-3.17723	0.487833	-6.51294	7.36947e-11	5.06876e-10	9.04568
117160	541.668	-3.17684	0.543376	-5.84649	5.02053e-09	2.7695e-08	9.04326
170461	13.8364	-3.17679	0.832851	-3.81435	0.000136539	0.000394775	9.04292
22710	44.9085	-3.17629	0.688291	-4.61474	3.93579e-06	1.45543e-05	9.03978
26397	664.933	-3.17469	0.815371	-3.89356	9.87841e-05	0.000292808	9.0298
114606	218.92	-3.17435	0.892029	-3.55857	0.000372881	0.000999155	9.02762
14590	299.438	-3.17266	0.242408	-13.0881	3.85042e-39	2.21752e-37	9.01708
338368	40.6273	-3.17027	0.770887	-4.11249	3.91414e-05	0.000123853	9.00213
20846	1018.09	-3.1692	0.387708	-8.17419	2.97853e-16	3.56899e-15	8.99547
100038436	1.60893	-3.16719	2.35734	-1.34355	0.179095	0.250644	8.98297
327768	0.988365	-3.16704	2.36185	-1.34091	0.179949	0.251473	8.98202
387353	0.99615	-3.16704	2.36185	-1.34091	0.179949	0.251473	8.98202
381580	2.7351	-3.16653	1.67265	-1.89312	0.0583415	0.0957104	8.97882
232449	559.151	-3.16559	0.339251	-9.3311	1.04773e-20	1.86471e-19	8.97299
399101	6.1462	-3.16498	0.84277	-3.75545	0.000173028	0.000491328	8.96922
23827	1639.59	-3.16374	0.475148	-6.65842	2.76786e-11	2.01205e-10	8.96149
69747	168.548	-3.16293	0.480718	-6.5796	4.71725e-11	3.33284e-10	8.95649
106759	78.5796	-3.16251	0.635304	-4.97795	6.42605e-07	2.66087e-06	8.95388
12833	309.227	-3.16251	1.00533	-3.14574	0.00165666	0.0039327	8.95387
100041697	182.118	-3.16163	0.602829	-5.24466	1.56572e-07	7.05285e-07	8.94841
14871	26.7678	-3.15996	0.820015	-3.85354	0.000116424	0.000340406	8.93803
623534	2.95472	-3.15897	1.66223	-1.90044	0.0573759	0.0942777	8.93189
71778	2495.51	-3.15881	0.337615	-9.35625	8.26131e-21	1.48813e-19	8.93092
240354	275.1	-3.15782	0.620338	-5.09049	3.57134e-07	1.52435e-06	8.92483
16668	1.58827	-3.15633	1.56157	-2.02126	0.0432529	0.0736691	8.91559
66616	232.962	-3.155	0.365858	-8.62358	6.48939e-18	9.00259e-17	8.9074
68731	227.769	-3.1533	0.745734	-4.22845	2.35305e-05	7.69882e-05	8.89688
100861979	3.57128	-3.15272	1.18983	-2.64972	0.00805582	0.0164763	8.89332
26395	1384.5	-3.15257	0.344395	-9.15394	5.48917e-20	9.20829e-19	8.89238
243655	1.58181	-3.15183	2.13385	-1.47706	0.13966	0.203101	8.8878
68209	474.095	-3.15152	0.301871	-10.4399	1.62924e-25	4.00719e-24	8.88588
121021	255.159	-3.15099	0.729227	-4.321	1.55323e-05	5.23052e-05	8.88265
14707	714.391	-3.15044	0.275676	-11.428	3.029e-30	1.01313e-28	8.87925
14685	6.13851	-3.14788	1.61467	-1.94955	0.0512293	0.0854048	8.86351
100041677	31.8186	-3.14644	0.675031	-4.66118	3.14401e-06	1.17971e-05	8.85468
68058	250.421	-3.14504	0.27129	-11.5929	4.47774e-31	1.56491e-29	8.84608
12946	208.455	-3.14477	0.580806	-5.4145	6.1461e-08	2.92736e-07	8.84444
432534	7.99909	-3.14266	1.2127	-2.59145	0.00955729	0.0191756	8.8315
109042	68.504	-3.14187	0.442095	-7.10679	1.18776e-12	9.98816e-12	8.82669
80291	386.55	-3.14182	0.315512	-9.95785	2.33045e-23	4.91831e-22	8.82639
15431	2.65032	-3.14175	2.36506	-1.3284	0.184046	0.256388	8.82595
100535	2.65032	-3.14175	2.36506	-1.3284	0.184046	0.256388	8.82595
94071	2.65032	-3.14175	2.36506	-1.3284	0.184046	0.256388	8.82595
69706	17.8469	-3.14124	0.587	-5.35134	8.73055e-08	4.07875e-07	8.82279
23994	4456.65	-3.13928	0.263217	-11.9266	8.59882e-33	3.28603e-31	8.81087
16192	1.19836	-3.13647	2.17968	-1.43896	0.150162	0.216202	8.79368
104725	1929.75	-3.1354	0.441857	-7.09596	1.28457e-12	1.07691e-11	8.78719
67623	1289.44	-3.13338	0.31305	-10.0092	1.38869e-23	2.98467e-22	8.77489
67091	528.98	-3.12727	0.458346	-6.82296	8.91864e-12	6.78979e-11	8.73783
50784	547.064	-3.12358	0.49679	-6.28752	3.22578e-10	2.05776e-09	8.71546
677289	11.9092	-3.12266	0.820227	-3.80707	0.000140622	0.000405576	8.70993
17191	861.837	-3.11889	0.293922	-10.6113	2.64126e-26	6.90104e-25	8.68717
52898	3146.04	-3.11823	0.377641	-8.25714	1.49203e-16	1.83349e-15	8.68323
67628	2348.47	-3.11583	0.42471	-7.33637	2.1946e-13	1.98863e-12	8.66878
68520	203.546	-3.11579	0.429495	-7.25454	4.03022e-13	3.55354e-12	8.66854
228607	120.326	-3.11363	0.436177	-7.13845	9.43883e-13	8.03652e-12	8.65557
80898	113.738	-3.1119	0.725345	-4.29023	1.78487e-05	5.94688e-05	8.64521
26427	62.696	-3.11133	0.734163	-4.23792	2.25596e-05	7.40041e-05	8.64177
56752	909.381	-3.11026	0.169644	-18.334	4.43242e-75	1.36786e-72	8.63537
230904	150.118	-3.11019	0.600127	-5.18256	2.18858e-07	9.6773e-07	8.63499
140792	160.471	-3.10852	0.798358	-3.89364	9.87508e-05	0.000292762	8.62498
69094	597.724	-3.10789	0.486037	-6.39436	1.61221e-10	1.06328e-09	8.62124
108961	131.094	-3.10748	0.916151	-3.39188	0.000694138	0.00177757	8.61875
13406	27.7484	-3.10724	1.11747	-2.78061	0.00542576	0.0115416	8.6173
108934	2572.89	-3.1054	0.567748	-5.46968	4.50846e-08	2.18749e-07	8.60633
110006	805.762	-3.104	0.469767	-6.60753	3.90778e-11	2.79596e-10	8.59798
85030	59.808	-3.10329	1.18498	-2.61885	0.0088227	0.0178417	8.59376
68920	423.085	-3.10257	0.610251	-5.08408	3.69406e-07	1.57221e-06	8.58946
11927	2043.59	-3.1	0.426085	-7.27553	3.45071e-13	3.06738e-12	8.57416
12868	5354.89	-3.09817	0.485232	-6.38493	1.71477e-10	1.12774e-09	8.56333
14281	7814.33	-3.09794	0.75921	-4.08048	4.49425e-05	0.000140982	8.56196
328778	5.30413	-3.09768	0.889275	-3.48338	0.000495129	0.00130115	8.56041
52685	18.227	-3.09393	1.14771	-2.69575	0.00702312	0.0145686	8.53821
20971	96.5595	-3.0938	0.722033	-4.28485	1.82862e-05	6.08029e-05	8.53744
66469	674.587	-3.09362	0.582941	-5.30693	1.11489e-07	5.13813e-07	8.53637
67723	291.154	-3.09356	0.639099	-4.84051	1.29509e-06	5.11902e-06	8.536
71281	1.40573	-3.09271	2.35895	-1.31105	0.18984	0.263361	8.53097
268890	783.238	-3.09216	0.474909	-6.51106	7.46239e-11	5.13051e-10	8.52771
68082	456.058	-3.09148	0.58047	-5.32583	1.00491e-07	4.64696e-07	8.52373
21356	1191.36	-3.09142	0.573693	-5.38863	7.09986e-08	3.35719e-07	8.52333
71946	993.735	-3.08988	0.665034	-4.6462	3.38102e-06	1.26458e-05	8.51425
68721	1082.47	-3.08964	0.479146	-6.44822	1.13169e-10	7.63924e-10	8.51285
14595	447.059	-3.08884	0.615297	-5.02009	5.16478e-07	2.15939e-06	8.50814
67313	240.905	-3.0887	0.547919	-5.63714	1.72894e-08	8.88422e-08	8.50729
433297	16.8794	-3.08779	0.671164	-4.60065	4.21184e-06	1.55155e-05	8.50193
70617	194.137	-3.08712	0.405887	-7.60586	2.83014e-14	2.78351e-13	8.49797
27426	377.107	-3.08603	0.445035	-6.93434	4.08123e-12	3.23414e-11	8.49154
100198	395.71	-3.08393	0.679875	-4.53602	5.73255e-06	2.06069e-05	8.4792
30935	83.5752	-3.08342	0.68312	-4.51373	6.3696e-06	2.2742e-05	8.47623
68385	59.3084	-3.08045	0.784455	-3.92687	8.60595e-05	0.000257847	8.45878
17281	553.497	-3.08007	0.325387	-9.46585	2.91179e-21	5.38138e-20	8.45655
621697	11.1088	-3.07994	0.914323	-3.36854	0.000755671	0.00191922	8.45577
11746	62.7073	-3.0797	0.847172	-3.63527	0.000277692	0.000762196	8.45436
54683	3367.4	-3.0785	0.652345	-4.71913	2.36852e-06	9.05342e-06	8.44738
231991	150.606	-3.0783	0.806212	-3.81823	0.000134413	0.00038897	8.44621
216881	1900.98	-3.07233	0.426658	-7.20091	5.98137e-13	5.21767e-12	8.41129
16542	221.173	-3.07163	0.989549	-3.10407	0.00190881	0.00446773	8.4072
69183	24.353	-3.0688	1.09536	-2.80164	0.00508437	0.0108934	8.39073
109801	1404.84	-3.06781	0.462317	-6.63572	3.22924e-11	2.32676e-10	8.38499
53906	1.6011	-3.06393	1.87631	-1.63295	0.102479	0.15611	8.36246
67078	1063.94	-3.06118	0.337668	-9.06565	1.23864e-19	2.0239e-18	8.34653
16852	309.758	-3.06073	0.623587	-4.90827	9.18831e-07	3.72543e-06	8.34397
59290	4.81071	-3.05623	1.72913	-1.7675	0.077145	0.122254	8.31798
18822	655.934	-3.05544	0.31274	-9.7699	1.51595e-22	3.04232e-21	8.31339
57339	25.6384	-3.05456	0.707348	-4.31833	1.57217e-05	5.28887e-05	8.30833
474332	18.4613	-3.05435	0.776253	-3.93474	8.32858e-05	0.000250041	8.30715
320975	8.91001	-3.05385	1.18668	-2.57344	0.0100693	0.0200698	8.30427
215789	345.234	-3.0528	0.732622	-4.16695	3.087e-05	9.91771e-05	8.29822
24066	130.183	-3.05126	0.745229	-4.09439	4.23284e-05	0.000133447	8.28933
57357	344.057	-3.05058	0.371684	-8.20746	2.25913e-16	2.731e-15	8.28547
231603	25.3505	-3.04785	1.16116	-2.62483	0.0086692	0.0175596	8.26977
70123	1218.47	-3.04709	0.596665	-5.10687	3.27536e-07	1.40719e-06	8.26545
55987	36.1386	-3.04528	0.919981	-3.31015	0.000932453	0.00233011	8.25506
77113	3057.05	-3.04417	0.438184	-6.94724	3.72496e-12	2.96619e-11	8.24872
[truncated: 1,211 more rows]
[truncated: 1 more columns]
