# Supplementary material for: Control of spinal motor neuron terminal differentiation through sustained Hoxc8 gene activity
Source: eLife. 2022 Mar 22;11:e70766. doi: 10.7554/eLife.70766 (PMC8940177; doi:10.7554/eLife.70766)
Supplement: Supplementary file 2. [file elife-70766-supp2.xlsx]

## Sheet: Embryonic
Gene ID	Gene symbol	Gene name
Gene-specific transcriptional regulator (PC00264)
MOUSE|MGI=MGI=1919378|UniProtKB=G3X964	2610008E11Rik	RIKEN cDNA 2610008E11 gene;2610008E11Rik;ortholog
MOUSE|MGI=MGI=1917194|UniProtKB=Q8BIB6	2810021J22Rik	RIKEN cDNA 2810021J22 gene;2810021J22Rik;ortholog
MOUSE|MGI=MGI=1917882|UniProtKB=J3QPX0	5730507C01Rik	RIKEN cDNA 5730507C01 gene;5730507C01Rik;ortholog
MOUSE|MGI=MGI=1202294|UniProtKB=O55112	Aff2	AF4/FMR2 family member 2;Aff2;ortholog
MOUSE|MGI=MGI=1341886|UniProtKB=Q91XC0	Ajuba	LIM domain-containing protein ajuba;Ajuba;ortholog
MOUSE|MGI=MGI=1891750|UniProtKB=Q9EQS3	Amy1	c-Myc-binding protein;Mycbp;ortholog
MOUSE|MGI=MGI=3650624|UniProtKB=A6PWV5	Arid3c	AT-rich interactive domain-containing protein 3C;Arid3c;ortholog
MOUSE|MGI=MGI=107188|UniProtKB=Q61324	Arnt2	Aryl hydrocarbon receptor nuclear translocator 2;Arnt2;ortholog
MOUSE|MGI=MGI=2684845|UniProtKB=Q2VPD4	Arntl2	Aryl hydrocarbon receptor nuclear translocator-like protein 2;Arntl2;ortholog
MOUSE|MGI=MGI=1097716|UniProtKB=O35085	Arx	Homeobox protein ARX;Arx;ortholog
MOUSE|MGI=MGI=1918343|UniProtKB=Q99NA2	Atoh8	Protein atonal homolog 8;Atoh8;ortholog
MOUSE|MGI=MGI=1859288|UniProtKB=P63157	Barhl1	BarH-like 1 homeobox protein;Barhl1;ortholog
MOUSE|MGI=MGI=1859314|UniProtKB=Q8VIB5	Barhl2	BarH-like 2 homeobox protein;Barhl2;ortholog
MOUSE|MGI=MGI=1929913|UniProtKB=Q99PV8	Bcl11b	B-cell lymphoma/leukemia 11B;Bcl11b;ortholog
MOUSE|MGI=MGI=1930001|UniProtKB=Q8C6A8	Bhlhe22	Class E basic helix-loop-helix protein 22;Bhlhe22;ortholog
MOUSE|MGI=MGI=2153710|UniProtKB=Q8BGW3	Bhlhe23	Class E basic helix-loop-helix protein 23;Bhlhe23;ortholog
MOUSE|MGI=MGI=1097164|UniProtKB=O35914	Bnc1	Zinc finger protein basonuclin-1;Bnc1;ortholog
MOUSE|MGI=MGI=2443805|UniProtKB=Q8BMQ3	Bnc2	Zinc finger protein basonuclin-2;Bnc2;ortholog
MOUSE|MGI=MGI=2146836|UniProtKB=B2KF05	Brpf3	Bromodomain and PHD finger-containing, 3;Brpf3;ortholog
MOUSE|MGI=MGI=2140230|UniProtKB=A2A891	Camta1	Calmodulin-binding transcription activator 1;Camta1;ortholog
MOUSE|MGI=MGI=1333833|UniProtKB=O70374	Cbfa2t2	Protein CBFA2T2;Cbfa2t2;ortholog
MOUSE|MGI=MGI=2142523|UniProtKB=Q68ED7	Crtc1	CREB-regulated transcription coactivator 1;Crtc1;ortholog
MOUSE|MGI=MGI=107321|UniProtKB=P70298	Cux2	Homeobox protein cut-like 2;Cux2;ortholog
MOUSE|MGI=MGI=99252|UniProtKB=Q9WUF2	Egr4	Early growth response protein 4;Egr4;ortholog
MOUSE|MGI=MGI=95389|UniProtKB=P09065	En1	Homeobox protein engrailed-1;En1;ortholog
MOUSE|MGI=MGI=2150010|UniProtKB=Q923Z4	Ferd3l	Fer3-like protein;Ferd3l;ortholog
MOUSE|MGI=MGI=1347472|UniProtKB=P35582	Foxa1	Hepatocyte nuclear factor 3-alpha;Foxa1;ortholog
MOUSE|MGI=MGI=1347476|UniProtKB=P35583	Foxa2	Hepatocyte nuclear factor 3-beta;Foxa2;ortholog
MOUSE|MGI=MGI=1927549|UniProtKB=Q64732	Foxb1	Forkhead box protein B1;Foxb1;ortholog
MOUSE|MGI=MGI=1347481|UniProtKB=Q61850	Foxc2	Forkhead box protein C2;Foxc2;ortholog
MOUSE|MGI=MGI=1347473|UniProtKB=Q61060	Foxd3	Forkhead box protein D3;Foxd3;ortholog
MOUSE|MGI=MGI=1347467|UniProtKB=Q60688	Foxd4	Forkhead box protein D4;Foxd4;ortholog
MOUSE|MGI=MGI=2443225|UniProtKB=Q8VHR5	Gatad2b	Transcriptional repressor p66-beta;Gatad2b;ortholog
MOUSE|MGI=MGI=95667|UniProtKB=P82976	Gbx1	Homeobox protein GBX-1;Gbx1;ortholog
MOUSE|MGI=MGI=95668|UniProtKB=P48031	Gbx2	Homeobox protein GBX-2;Gbx2;ortholog
MOUSE|MGI=MGI=1932535|UniProtKB=Q8VDL9	Glis2	Zinc finger protein GLIS2;Glis2;ortholog
MOUSE|MGI=MGI=3696710|UniProtKB=Q0P5U5	Gm3055	Predicted gene 3055;Gm3055;ortholog
MOUSE|MGI=MGI=3643133|UniProtKB=A0A1B0GR71	Gm4924	Predicted gene 4924;Gm4924;ortholog
MOUSE|MGI=MGI=1917579|UniProtKB=Q9DB00	Gon4l	GON-4-like protein;Gon4l;ortholog
MOUSE|MGI=MGI=1352760|UniProtKB=Q9JMG7	Hdgfl3	Hepatoma-derived growth factor-related protein 3;Hdgfl3;ortholog
MOUSE|MGI=MGI=104876|UniProtKB=P70120	Hes5	Transcription factor HES-5;Hes5;ortholog
MOUSE|MGI=MGI=1859778|UniProtKB=Q0VBL6	Hif3a	Hypoxia-inducible factor 3-alpha;Hif3a;ortholog
MOUSE|MGI=MGI=98504|UniProtKB=P22361	Hnf1a	Hepatocyte nuclear factor 1-alpha;Hnf1a;ortholog
MOUSE|MGI=MGI=98505|UniProtKB=P27889	Hnf1b	Hepatocyte nuclear factor 1-beta;Hnf1b;ortholog
MOUSE|MGI=MGI=96177|UniProtKB=P09021	Hoxa5	Homeobox protein Hox-A5;Hoxa5;ortholog
MOUSE|MGI=MGI=96178|UniProtKB=P09092	Hoxa6	Homeobox protein Hox-A6;Hoxa6;ortholog
MOUSE|MGI=MGI=96179|UniProtKB=P02830	Hoxa7	Homeobox protein Hox-A7;Hoxa7;ortholog
MOUSE|MGI=MGI=96186|UniProtKB=P09079	Hoxb5	Homeobox protein Hox-B5;Hoxb5;ortholog
MOUSE|MGI=MGI=96187|UniProtKB=P09023	Hoxb6	Homeobox protein Hox-B6;Hoxb6;ortholog
MOUSE|MGI=MGI=96188|UniProtKB=P09024	Hoxb7	Homeobox protein Hox-B7;Hoxb7;ortholog
MOUSE|MGI=MGI=96196|UniProtKB=P32043	Hoxc5	Homeobox protein Hox-C5;Hoxc5;ortholog
MOUSE|MGI=MGI=96197|UniProtKB=P10629	Hoxc6	Homeobox protein Hox-C6;Hoxc6;ortholog
MOUSE|MGI=MGI=96239|UniProtKB=P38533	Hsf2	Heat shock factor protein 2;Hsf2;ortholog
MOUSE|MGI=MGI=1347058|UniProtKB=Q9R0L1	Hsf4	Heat shock factor protein 4;Hsf4;ortholog
MOUSE|MGI=MGI=99414|UniProtKB=P41139	Id4	DNA-binding protein inhibitor ID-4;Id4;ortholog
MOUSE|MGI=MGI=1342541|UniProtKB=P81183	Ikzf2	Zinc finger protein Helios;Ikzf2;ortholog
MOUSE|MGI=MGI=2442463|UniProtKB=Q8K3X4	Irf2bpl	Probable E3 ubiquitin-protein ligase IRF2BPL;Irf2bpl;ortholog
MOUSE|MGI=MGI=1197515|UniProtKB=P81068	Irx1	Iroquois-class homeodomain protein IRX-1;Irx1;ortholog
MOUSE|MGI=MGI=1197526|UniProtKB=P81066	Irx2	Iroquois-class homeodomain protein IRX-2;Irx2;ortholog
MOUSE|MGI=MGI=1197522|UniProtKB=P81067	Irx3	Iroquois-class homeodomain protein IRX-3;Irx3;ortholog
MOUSE|MGI=MGI=1355275|UniProtKB=Q9QY61	Irx4	Iroquois-class homeodomain protein IRX-4;Irx4;ortholog
MOUSE|MGI=MGI=101791|UniProtKB=P61372	Isl1	Insulin gene enhancer protein ISL-1;Isl1;ortholog
MOUSE|MGI=MGI=109156|UniProtKB=Q9CXV0	Isl2	Insulin gene enhancer protein ISL-2;Isl2;ortholog
MOUSE|MGI=MGI=2148019|UniProtKB=Q6IE82	Jade3	Protein Jade-3;Jade3;ortholog
MOUSE|MGI=MGI=104867|UniProtKB=P52955	Lbx1	Transcription factor LBX1;Lbx1;ortholog
MOUSE|MGI=MGI=894762|UniProtKB=P70662	Ldb1	LIM domain-binding protein 1;Ldb1;ortholog
MOUSE|MGI=MGI=96785|UniProtKB=Q9Z0S2	Lhx2	LIM/homeobox protein Lhx2;Lhx2;ortholog
MOUSE|MGI=MGI=102673|UniProtKB=P50481	Lhx3	LIM/homeobox protein Lhx3;Lhx3;ortholog
MOUSE|MGI=MGI=101776|UniProtKB=P53776	Lhx4	LIM/homeobox protein Lhx4;Lhx4;ortholog
MOUSE|MGI=MGI=107792|UniProtKB=P61375	Lhx5	LIM/homeobox protein Lhx5;Lhx5;ortholog
MOUSE|MGI=MGI=1316721|UniProtKB=Q9WUH2	Lhx9	LIM/homeobox protein Lhx9;Lhx9;ortholog
MOUSE|MGI=MGI=1100513|UniProtKB=O88609	Lmx1b	LIM homeobox transcription factor 1-beta;Lmx1b;ortholog
MOUSE|MGI=MGI=2673307|UniProtKB=Q8CF90	Mafa	Transcription factor MafA;Mafa;ortholog
MOUSE|MGI=MGI=1890504|UniProtKB=Q6T264	Maml1	Mastermind-like protein 1;Maml1;ortholog
MOUSE|MGI=MGI=2389461|UniProtKB=D4QGC2	Maml3	Mastermind-2;Maml3;ortholog
MOUSE|MGI=MGI=1338823|UniProtKB=P56671	Maz	Myc-associated zinc finger protein;Maz;ortholog
MOUSE|MGI=MGI=95457|UniProtKB=P14404	Mecom	Histone-lysine N-methyltransferase MECOM;Mecom;ortholog
MOUSE|MGI=MGI=104717|UniProtKB=Q60954	Meis1	Homeobox protein Meis1;Meis1;ortholog
MOUSE|MGI=MGI=108564|UniProtKB=P97367	Meis2	Homeobox protein Meis2;Meis2;ortholog
MOUSE|MGI=MGI=108519|UniProtKB=P97368	Meis3	Homeobox protein Meis3;Meis3;ortholog
MOUSE|MGI=MGI=1352483|UniProtKB=A2AWL7	Mga	MAX gene-associated protein;Mga;ortholog
MOUSE|MGI=MGI=1935145|UniProtKB=B1AR10	Mllt6	Myeloid/lymphoid or mixed-lineage leukemia; translocated to, 6;Mllt6;ortholog
MOUSE|MGI=MGI=109160|UniProtKB=Q9QZW9	Mnx1	Motor neuron and pancreas homeobox protein 1;Mnx1;ortholog
MOUSE|MGI=MGI=97169|UniProtKB=Q03358	Msx2	Homeobox protein MSX-2;Msx2;ortholog
MOUSE|MGI=MGI=106587|UniProtKB=P70354	Msx3	Homeobox protein MSX-3;Msx3;ortholog
MOUSE|MGI=MGI=2150037|UniProtKB=Q8K4B0	Mta1	Metastasis-associated protein MTA1;Mta1;ortholog
MOUSE|MGI=MGI=1100535|UniProtKB=Q8CFC2	Myt1	Myelin transcription factor 1;Myt1;ortholog
MOUSE|MGI=MGI=1100511|UniProtKB=P97500	Myt1l	Myelin transcription factor 1-like protein;Myt1l;ortholog
MOUSE|MGI=MGI=2385165|UniProtKB=Q91W39	Ncoa5	Nuclear receptor coactivator 5;Ncoa5;ortholog
MOUSE|MGI=MGI=1339708|UniProtKB=Q60867	Neurod1	Neurogenic differentiation factor 1;Neurod1;ortholog
MOUSE|MGI=MGI=107755|UniProtKB=Q62414	Neurod2	Neurogenic differentiation factor 2;Neurod2;ortholog
MOUSE|MGI=MGI=108055|UniProtKB=O09105	Neurod4	Neurogenic differentiation factor 4;Neurod4;ortholog
MOUSE|MGI=MGI=106593|UniProtKB=P48986	Neurod6	Neurogenic differentiation factor 6;Neurod6;ortholog
MOUSE|MGI=MGI=107754|UniProtKB=P70660	Neurog1	Neurogenin-1;Neurog1;ortholog
MOUSE|MGI=MGI=109619|UniProtKB=P70447	Neurog2	Neurogenin-2;Neurog2;ortholog
MOUSE|MGI=MGI=893591|UniProtKB=P70661	Neurog3	Neurogenin-3;Neurog3;ortholog
MOUSE|MGI=MGI=1859333|UniProtKB=Q9WV30	Nfat5	Nuclear factor of activated T-cells 5;Nfat5;ortholog
MOUSE|MGI=MGI=1920431|UniProtKB=Q8K120	Nfatc4	Nuclear factor of activated T-cells, cytoplasmic 4;Nfatc4;ortholog
MOUSE|MGI=MGI=97316|UniProtKB=P23708	Nfya	Nuclear transcription factor Y subunit alpha;Nfya;ortholog
MOUSE|MGI=MGI=98481|UniProtKB=Q02576	Nhlh1	Helix-loop-helix protein 1;Nhlh1;ortholog
MOUSE|MGI=MGI=97324|UniProtKB=Q64221	Nhlh2	Helix-loop-helix protein 2;Nhlh2;ortholog
MOUSE|MGI=MGI=1924536|UniProtKB=Q8BY02	Nkrf	NF-kappa-B-repressing factor;Nkrf;ortholog
MOUSE|MGI=MGI=109346|UniProtKB=G3UXB3	Nkx1-1	NK1 homeobox 1;Nkx1-1;ortholog
MOUSE|MGI=MGI=104806|UniProtKB=P42580	Nkx1-2	NK1 transcription factor-related protein 2;Nkx1-2;ortholog
MOUSE|MGI=MGI=97352|UniProtKB=P97436	Nkx3-1	Homeobox protein Nkx-3.1;Nkx3-1;ortholog
MOUSE|MGI=MGI=1351610|UniProtKB=Q9QZQ0	Npas3	Neuronal PAS domain-containing protein 3;Npas3;ortholog
MOUSE|MGI=MGI=2664186|UniProtKB=Q8BGD7	Npas4	Neuronal PAS domain-containing protein 4;Npas4;ortholog
MOUSE|MGI=MGI=1346307|UniProtKB=O35627	Nr1i3	Nuclear receptor subfamily 1 group I member 3;Nr1i3;ortholog
MOUSE|MGI=MGI=1352451|UniProtKB=Q60632	Nr2f1	COUP transcription factor 1;Nr2f1;ortholog
MOUSE|MGI=MGI=1352452|UniProtKB=P43135	Nr2f2	COUP transcription factor 2;Nr2f2;ortholog
MOUSE|MGI=MGI=1346834|UniProtKB=P45448	Nr5a2	Nuclear receptor subfamily 5 group A member 2;Nr5a2;ortholog
MOUSE|MGI=MGI=2149955|UniProtKB=Q6PFG8	Olig3	Oligodendrocyte transcription factor 3;Olig3;ortholog
MOUSE|MGI=MGI=1196423|UniProtKB=O08755	Onecut1	Hepatocyte nuclear factor 6;Onecut1;ortholog
MOUSE|MGI=MGI=1891408|UniProtKB=Q6XBJ3	Onecut2	One cut domain family member 2;Onecut2;ortholog
MOUSE|MGI=MGI=1891409|UniProtKB=Q8K557	Onecut3	One cut domain family member 3;Onecut3;ortholog
MOUSE|MGI=MGI=1344424|UniProtKB=Q9WVG7	Osr1	Protein odd-skipped-related 1;Osr1;ortholog
MOUSE|MGI=MGI=97495|UniProtKB=P41778	Pbx1	Pre-B-cell leukemia transcription factor 1;Pbx1;ortholog
MOUSE|MGI=MGI=97496|UniProtKB=O35317	Pbx3	Pre-B-cell leukemia transcription factor 3;Pbx3;ortholog
MOUSE|MGI=MGI=1923539|UniProtKB=Q9D4H9	Phf14	PHD finger protein 14;Phf14;ortholog
MOUSE|MGI=MGI=2445415|UniProtKB=Q8BG99	Pknox2	Homeobox protein PKNOX2;Pknox2;ortholog
MOUSE|MGI=MGI=1100874|UniProtKB=Q9JLQ4	Plagl1	Pleiomorphic adenoma gene-like 1;Plagl1;ortholog
MOUSE|MGI=MGI=2685553|UniProtKB=A2AGX3	Prdm11	PR domain-containing protein 11;Prdm11;ortholog
MOUSE|MGI=MGI=2685844|UniProtKB=A2AJ77	Prdm12	PR domain zinc finger protein 12;Prdm12;ortholog
MOUSE|MGI=MGI=2448528|UniProtKB=E9PZZ1	Prdm13	PR domain zinc finger protein 13;Prdm13;ortholog
MOUSE|MGI=MGI=1930121|UniProtKB=E9Q8T2	Prdm15	PR domain zinc finger protein 15;Prdm15;ortholog
MOUSE|MGI=MGI=2684938|UniProtKB=Q3UZD5	Prdm6	Putative histone-lysine N-methyltransferase PRDM6;Prdm6;ortholog
MOUSE|MGI=MGI=2148204|UniProtKB=Q8BYH0	Prrxl1	Dorsal root ganglia homeobox protein;Drgx;ortholog
MOUSE|MGI=MGI=1328312|UniProtKB=Q9QX98	Ptf1a	Pancreas transcription factor 1 subunit alpha;Ptf1a;ortholog
MOUSE|MGI=MGI=103291|UniProtKB=Q61818	Rai1	Retinoic acid-induced protein 1;Rai1;ortholog
MOUSE|MGI=MGI=97857|UniProtKB=P22605	Rarb	Retinoic acid receptor beta;Rarb;ortholog
MOUSE|MGI=MGI=1927369|UniProtKB=Q8BQC8	Rbak	RB-associated KRAB zinc finger protein;Rbak;ortholog
MOUSE|MGI=MGI=106583|UniProtKB=P48379	Rfx2	DNA-binding protein RFX2;Rfx2;ortholog
MOUSE|MGI=MGI=106582|UniProtKB=P48381	Rfx3	Transcription factor RFX3;Rfx3;ortholog
MOUSE|MGI=MGI=1918387|UniProtKB=Q7TNK1	Rfx4	Transcription factor RFX4;Rfx4;ortholog
MOUSE|MGI=MGI=2442675|UniProtKB=F8VPJ6	Rfx7	Regulatory factor X, 7;Rfx7;ortholog
MOUSE|MGI=MGI=3588206|UniProtKB=D3YU81	Rfx8	DNA-binding protein RFX8;Rfx8;ortholog
MOUSE|MGI=MGI=104793|UniProtKB=Q61909	Runx1t1	Protein CBFA2T1;Runx1t1;ortholog
MOUSE|MGI=MGI=109295|UniProtKB=Q62255	Sall3	Sal-like protein 3;Sall3;ortholog
MOUSE|MGI=MGI=2679336|UniProtKB=Q8VI24	Satb2	DNA-binding protein SATB2;Satb2;ortholog
MOUSE|MGI=MGI=2176606|UniProtKB=Q99M85	Scrt1	Transcriptional repressor scratch 1;Scrt1;ortholog
MOUSE|MGI=MGI=2139287|UniProtKB=Q8BTH6	Scrt2	Transcriptional repressor scratch 2;Scrt2;ortholog
MOUSE|MGI=MGI=98306|UniProtKB=Q61045	Sim1	Single-minded homolog 1;Sim1;ortholog
MOUSE|MGI=MGI=102780|UniProtKB=Q62231	Six1	Homeobox protein SIX1;Six1;ortholog
MOUSE|MGI=MGI=1328787|UniProtKB=P97454	Smad5	Mothers against decapentaplegic homolog 5;Smad5;ortholog
MOUSE|MGI=MGI=1336883|UniProtKB=O35182	Smad6	Mothers against decapentaplegic homolog 6;Smad6;ortholog
MOUSE|MGI=MGI=1859993|UniProtKB=Q9JIW5	Smad9	Mothers against decapentaplegic homolog 9;Smad9;ortholog
MOUSE|MGI=MGI=98357|UniProtKB=P53783	Sox1	Transcription factor SOX-1;Sox1;ortholog
MOUSE|MGI=MGI=98359|UniProtKB=Q7M6Y2	Sox11	Transcription factor SOX-11;Sox11;ortholog
MOUSE|MGI=MGI=98362|UniProtKB=Q04892	Sox14	Transcription factor SOX-14;Sox14;ortholog
MOUSE|MGI=MGI=98363|UniProtKB=P43267	Sox15	Protein SOX-15;Sox15;ortholog
MOUSE|MGI=MGI=98366|UniProtKB=Q06831	Sox4	Transcription factor SOX-4;Sox4;ortholog
MOUSE|MGI=MGI=1927715|UniProtKB=Q9JHX2	Sp5	Transcription factor Sp5;Sp5;ortholog
MOUSE|MGI=MGI=1932575|UniProtKB=Q9ESX2	Sp6	Transcription factor Sp6;Sp6;ortholog
MOUSE|MGI=MGI=2443471|UniProtKB=Q8BMJ8	Sp8	Transcription factor Sp8;Sp8;ortholog
MOUSE|MGI=MGI=3574660|UniProtKB=Q64HY3	Sp9	Transcription factor Sp9;Sp9;ortholog
MOUSE|MGI=MGI=1353422|UniProtKB=Q9WTP3	Spdef	SAM pointed domain-containing Ets transcription factor;Spdef;ortholog
MOUSE|MGI=MGI=2444061|UniProtKB=Q8BW22	Ss18l1	Calcium-responsive transactivator;Ss18l1;ortholog
MOUSE|MGI=MGI=98480|UniProtKB=P22091	Tal1	T-cell acute lymphocytic leukemia protein 1 homolog;Tal1;ortholog
MOUSE|MGI=MGI=1277234|UniProtKB=O70306	Tbx15	T-box transcription factor TBX15;Tbx15;ortholog
MOUSE|MGI=MGI=98494|UniProtKB=Q60707	Tbx2	T-box transcription factor TBX2;Tbx2;ortholog
MOUSE|MGI=MGI=1888496|UniProtKB=Q9ES03	Tbx20	T-box transcription factor TBX20;Tbx20;ortholog
MOUSE|MGI=MGI=101876|UniProtKB=P30051	Tead1	Transcriptional enhancer factor TEF-1;Tead1;ortholog
MOUSE|MGI=MGI=104904|UniProtKB=P48301	Tead2	Transcriptional enhancer factor TEF-4;Tead2;ortholog
MOUSE|MGI=MGI=109241|UniProtKB=P70210	Tead3	Transcriptional enhancer factor TEF-5;Tead3;ortholog
MOUSE|MGI=MGI=2444691|UniProtKB=Q3UNW5	Tfcp2l1	Transcription factor CP2-like protein 1;Tfcp2l1;ortholog
MOUSE|MGI=MGI=104635|UniProtKB=Q9WVB2	Tle2	Transducin-like enhancer protein 2;Tle2;ortholog
MOUSE|MGI=MGI=104634|UniProtKB=Q08122	Tle3	Transducin-like enhancer protein 3;Tle3;ortholog
MOUSE|MGI=MGI=1346031|UniProtKB=Q5DTH5	Tshz1	Teashirt homolog 1;Tshz1;ortholog
MOUSE|MGI=MGI=104685|UniProtKB=Q9D030	Twist2	Twist-related protein 2;Twist2;ortholog
MOUSE|MGI=MGI=1920819|UniProtKB=P85442	Vgll3	Transcription cofactor vestigial-like protein 3;Vgll3;ortholog
MOUSE|MGI=MGI=1332638|UniProtKB=O88286	Wiz	Protein Wiz;Wiz;ortholog
MOUSE|MGI=MGI=98968|UniProtKB=P22561	Wt1	Wilms tumor protein homolog;Wt1;ortholog
MOUSE|MGI=MGI=99150|UniProtKB=Q00899	Yy1	Transcriptional repressor protein YY1;Yy1;ortholog
MOUSE|MGI=MGI=88133|UniProtKB=Q9Z150	Zbtb12	Zinc finger and BTB domain-containing 12;Zbtb12;ortholog
MOUSE|MGI=MGI=1353609|UniProtKB=Q9WUK6	Zbtb18	Zinc finger and BTB domain-containing protein 18;Zbtb18;ortholog
MOUSE|MGI=MGI=2444402|UniProtKB=Q8C8S0	Zbtb26	Zinc finger and BTB domain containing 26, isoform CRA_a;Zbtb26;ortholog
MOUSE|MGI=MGI=1922541|UniProtKB=Q91X45	Zbtb3	Zinc finger and BTB domain-containing protein 3;Zbtb3;ortholog
MOUSE|MGI=MGI=1927290|UniProtKB=Q8BN78	Zbtb33	Transcriptional regulator Kaiso;Zbtb33;ortholog
MOUSE|MGI=MGI=2443316|UniProtKB=Q6PDK0	Zbtb39	Zinc finger and BTB domain-containing 39;Zbtb39;ortholog
MOUSE|MGI=MGI=1922830|UniProtKB=Q5F293	Zbtb4	Zinc finger and BTB domain-containing protein 4;Zbtb4;ortholog
MOUSE|MGI=MGI=2444487|UniProtKB=Q811F1	Zbtb41	Zinc finger and BTB domain-containing protein 41;Zbtb41;ortholog
MOUSE|MGI=MGI=2442998|UniProtKB=Q8K088	Zbtb6	Zinc finger and BTB domain-containing protein 6;Zbtb6;ortholog
MOUSE|MGI=MGI=2682314|UniProtKB=Q6ZPZ3	Zc3h4	Zinc finger CCCH domain-containing protein 4;Zc3h4;ortholog
MOUSE|MGI=MGI=1344313|UniProtKB=Q64318	Zeb1	Zinc finger E-box-binding homeobox 1;Zeb1;ortholog
MOUSE|MGI=MGI=2686934|UniProtKB=Q2MHN3	Zfhx2	Zinc finger homeobox protein 2;Zfhx2;ortholog
MOUSE|MGI=MGI=99948|UniProtKB=Q61329	Zfhx3	Zinc finger homeobox protein 3;Zfhx3;ortholog
MOUSE|MGI=MGI=2137668|UniProtKB=Q9JJN2	Zfhx4	Zinc finger homeobox protein 4;Zfhx4;ortholog
MOUSE|MGI=MGI=107547|UniProtKB=Q8BP18	Zfp101	Zinc finger protein 101;Zfp101;ortholog
MOUSE|MGI=MGI=99156|UniProtKB=P10751	Zfp11	Zinc finger protein 11;Zfp11;ortholog
MOUSE|MGI=MGI=1929116|UniProtKB=Q8C689	Zfp113	Zinc finger protein 113;Zfp113;ortholog
MOUSE|MGI=MGI=1347092|UniProtKB=Q8BQN6	Zfp146	Zinc finger protein OZF;Znf146;ortholog
MOUSE|MGI=MGI=1919404|UniProtKB=Q6PCM4	Zfp157	Zinc finger protein 157;Zfp157;ortholog
MOUSE|MGI=MGI=2686600|UniProtKB=B9EJW5	Zfp174	Zinc finger protein 174;Zfp174;ortholog
MOUSE|MGI=MGI=2682609|UniProtKB=G3X8R7	Zfp212	Zinc finger protein 212;Zfp212;ortholog
MOUSE|MGI=MGI=2679295|UniProtKB=E9PWT2	Zfp229	Zinc finger protein 229;Zfp229;ortholog
MOUSE|MGI=MGI=1926950|UniProtKB=S4R299	Zfp236	Zinc finger protein 236;Zfp236;ortholog
MOUSE|MGI=MGI=1919970|UniProtKB=Q640N4	Zfp248	Zinc finger protein 248;Zfp248;ortholog
MOUSE|MGI=MGI=99173|UniProtKB=P10076	Zfp26	Zinc finger protein 26;Zfp26;ortholog
MOUSE|MGI=MGI=2387585|UniProtKB=Q6P3Y5	Zfp280c	Zinc finger protein 280C;Znf280c;ortholog
MOUSE|MGI=MGI=2384583|UniProtKB=Q68FE8	Zfp280d	Zinc finger protein 280D;Znf280d;ortholog
MOUSE|MGI=MGI=2141413|UniProtKB=E9PVC2	Zfp282	Zinc finger protein 282;Zfp282;ortholog
MOUSE|MGI=MGI=2442566|UniProtKB=Q8BZ89	Zfp322a	Zinc finger protein 322;Znf322;ortholog
MOUSE|MGI=MGI=2682937|UniProtKB=Q6PGC9	Zfp341	Zinc finger protein 341;Zfp341;ortholog
MOUSE|MGI=MGI=2176229|UniProtKB=Q921B4	Zfp369	Neurotrophin receptor-interacting factor 2;Nrif2;ortholog
MOUSE|MGI=MGI=99181|UniProtKB=P17141	Zfp37	Zinc finger protein 37;Zfp37;ortholog
MOUSE|MGI=MGI=1920979|UniProtKB=A0A087WRR7	Zfp383	Zinc finger protein 383;Zfp383;ortholog
MOUSE|MGI=MGI=99186|UniProtKB=Q02526	Zfp41	Zinc finger protein 41;Zfp41;ortholog
MOUSE|MGI=MGI=1914505|UniProtKB=Q9ERU3	Zfp422	Zinc finger protein 22;Znf22;ortholog
MOUSE|MGI=MGI=1891217|UniProtKB=Q80TS5	Zfp423	Zinc finger protein 423;Znf423;ortholog
MOUSE|MGI=MGI=2143340|UniProtKB=Q8R2V3	Zfp445	Zinc finger protein 445;Znf445;ortholog
MOUSE|MGI=MGI=2442185|UniProtKB=Q8C9M8	Zfp446	Zinc finger protein 446;Zfp446;ortholog
MOUSE|MGI=MGI=2664334|UniProtKB=L7N1X4	Zfp457	Zinc finger protein 457;Zfp457;ortholog
MOUSE|MGI=MGI=3040701|UniProtKB=Q8BZ17	Zfp459	Zinc finger protein 459;Zfp459;ortholog
MOUSE|MGI=MGI=99192|UniProtKB=Q8BPP0	Zfp46	Zinc finger protein 436;Znf436;ortholog
MOUSE|MGI=MGI=2140750|UniProtKB=B2RRE4	Zfp518b	Zinc finger protein 518B;Znf518b;ortholog
MOUSE|MGI=MGI=95459|UniProtKB=Q6KAS7	Zfp521	Zinc finger protein 521;Znf521;ortholog
MOUSE|MGI=MGI=99204|UniProtKB=Q8C6P8	Zfp57	Zinc finger protein 57;Zfp57;ortholog
MOUSE|MGI=MGI=99207|UniProtKB=P16374	Zfp60	Zinc finger protein 60;Zfp60;ortholog
MOUSE|MGI=MGI=1918413|UniProtKB=A0A0U1RQ84	Zfp626	Zinc finger protein 626;Zfp626;ortholog
MOUSE|MGI=MGI=2442757|UniProtKB=Q2TL60	Zfp667	Zinc finger protein 667;Znf667;ortholog
MOUSE|MGI=MGI=3045342|UniProtKB=A2ANX9	Zfp711	Zinc finger protein 711;Znf711;ortholog
MOUSE|MGI=MGI=3040706|UniProtKB=B8JJX8	Zfp738	Zinc finger protein 738;Zfp738;ortholog
MOUSE|MGI=MGI=2445100|UniProtKB=Q8BIQ8	Zfp770	Zinc finger protein 770;Znf770;ortholog
MOUSE|MGI=MGI=1919556|UniProtKB=B9EKF4	Zfp777	Zinc finger protein 777;Zfp777;ortholog
MOUSE|MGI=MGI=107783|UniProtKB=Q5U406	Zfp78	Zinc finger protein 78;Zfp78;ortholog
MOUSE|MGI=MGI=3026883|UniProtKB=Q8BV42	Zfp786	Zinc finger protein 786;Znf786;ortholog
MOUSE|MGI=MGI=1914857|UniProtKB=E9Q980	Zfp788	Zinc finger protein 788;Zfp788;ortholog
MOUSE|MGI=MGI=3648473|UniProtKB=Q497V9	Zfp791	Zinc finger protein 791;Zfp791;ortholog
MOUSE|MGI=MGI=2443934|UniProtKB=Q8BHK4	Zfp799	RIKEN cDNA 6030490I01;Zfp799;ortholog
MOUSE|MGI=MGI=2384563|UniProtKB=Q99K45	Zfp810	Zinc finger protein 810;Zfp810;ortholog
MOUSE|MGI=MGI=2682944|UniProtKB=A0A0J9YU71	Zfp811	Zinc finger protein 811;Zfp811;ortholog
MOUSE|MGI=MGI=1921650|UniProtKB=Q80V81	Zfp819	Zinc finger protein 819;Zfp819;ortholog
MOUSE|MGI=MGI=2444807|UniProtKB=Q505G8	Zfp827	Zinc finger protein 827;Znf827;ortholog
MOUSE|MGI=MGI=2685638|UniProtKB=A0A1D5RM95	Zfp853	Zinc finger protein 853;Zfp853;ortholog
MOUSE|MGI=MGI=2442656|UniProtKB=Q3U3I9	Zfp865	Zinc finger protein 865;Znf865;ortholog
MOUSE|MGI=MGI=99210|UniProtKB=Q8BIS1	Zfp9	Zinc finger protein 9;Zfp9;ortholog
MOUSE|MGI=MGI=104786|UniProtKB=Q61967	Zfp90	Zinc finger protein 90;Zfp90;ortholog
MOUSE|MGI=MGI=2445132|UniProtKB=F6WAU7	Zfp945	Zinc finger protein 945;Zfp945;ortholog
MOUSE|MGI=MGI=1918890|UniProtKB=E9Q732	Zfp949	Zinc finger protein 949;Zfp949;ortholog
MOUSE|MGI=MGI=4834570|UniProtKB=Q80XR7	Zfp955a	Zinc finger protein 422, related sequence 1;Zfp955a;ortholog
MOUSE|MGI=MGI=4834573|UniProtKB=L7N232	Zfp955b	Zinc finger protein 955B;Zfp955b;ortholog
MOUSE|MGI=MGI=3646490|UniProtKB=B2RR88	Zfp964	EG636741 protein;Zfp964;ortholog
MOUSE|MGI=MGI=1920680|UniProtKB=Q3UVF6	Zfp974	Zinc finger protein 974;Zfp974;ortholog
MOUSE|MGI=MGI=1334444|UniProtKB=Q8CCH7	Zfpm2	Zinc finger protein ZFPM2;Zfpm2;ortholog
MOUSE|MGI=MGI=106683|UniProtKB=P46684	Zic1	Zinc finger protein ZIC 1;Zic1;ortholog
MOUSE|MGI=MGI=106679|UniProtKB=Q62520	Zic2	Zinc finger protein ZIC 2;Zic2;ortholog
MOUSE|MGI=MGI=1929518|UniProtKB=Q7TQ40	Zic5	Zinc finger protein ZIC 5;Zic5;ortholog
MOUSE|MGI=MGI=2444060|UniProtKB=G3X952	Zkscan2	MCG20985, isoform CRA_a;Zkscan2;ortholog
MOUSE|MGI=MGI=3649412|UniProtKB=Q5SZT6	Zkscan4	MCG23028;Zkscan4;ortholog
MOUSE|MGI=MGI=1923257|UniProtKB=Q9CU65	Zmym2	Zinc finger MYM-type protein 2;Zmym2;ortholog
MOUSE|MGI=MGI=1927231|UniProtKB=Q9JLM4	Zmym3	Zinc finger MYM-type protein 3;Zmym3;ortholog
MOUSE|MGI=MGI=1915035|UniProtKB=A2A791	Zmym4	Zinc finger MYM-type protein 4;Zmym4;ortholog
MOUSE|MGI=MGI=3643810|UniProtKB=E9PUD6	Zscan18	Zinc finger and SCAN domain-containing 18;Zscan18;ortholog
MOUSE|MGI=MGI=99176|UniProtKB=Q07230	Zscan2	Zinc finger and SCAN domain-containing protein 2;Zscan2;ortholog
MOUSE|MGI=MGI=99182|UniProtKB=Q07231	Zscan21	Zinc finger and SCAN domain-containing protein 21;Zscan21;ortholog
MOUSE|MGI=MGI=3531417|UniProtKB=Q5RJ54	Zscan26	Zinc finger and SCAN domain-containing protein 26;Zscan26;ortholog
Protein modifying enzyme (PC00260)
MOUSE|MGI=MGI=2447992|UniProtKB=Q38HM4	Trim63	E3 ubiquitin-protein ligase TRIM63;Trim63;ortholog
MOUSE|MGI=MGI=2384877|UniProtKB=Q8VCA5	Cap2	Transmembrane protease serine 4;Tmprss4;ortholog
MOUSE|MGI=MGI=2652869|UniProtKB=Q5SYL1	Rskr	Ribosomal protein S6 kinase-related protein;Rskr;ortholog
MOUSE|MGI=MGI=1861229|UniProtKB=Q9JI76	Adam21	Disintegrin and metalloproteinase domain-containing protein 21;Adam21;ortholog
MOUSE|MGI=MGI=1927552|UniProtKB=Q9JJX8	Stk32b	Serine/threonine-protein kinase 32B;Stk32b;ortholog
MOUSE|MGI=MGI=1924989|UniProtKB=Q8BLI0	Adamtsl1	ADAMTS-like protein 1;Adamtsl1;ortholog
MOUSE|MGI=MGI=1922075|UniProtKB=Q6P7W0	Senp6	Sentrin-specific protease 6;Senp6;ortholog
MOUSE|MGI=MGI=3605764|UniProtKB=Q8K4I7	Prss45	Inactive serine protease 45;Prss45;ortholog
MOUSE|MGI=MGI=1918244|UniProtKB=Q09LZ8	Agbl4	Cytosolic carboxypeptidase 6;Agbl4;ortholog
MOUSE|MGI=MGI=1922857|UniProtKB=Q3UH66	Wnk2	Serine/threonine-protein kinase WNK2;Wnk2;ortholog
MOUSE|MGI=MGI=1341813|UniProtKB=Q923W9	Adam33	Disintegrin and metalloproteinase domain-containing protein 33;Adam33;ortholog
MOUSE|MGI=MGI=2444541|UniProtKB=Q8BUM9	Usp43	Ubiquitin carboxyl-terminal hydrolase 43;Usp43;ortholog
MOUSE|MGI=MGI=1354956|UniProtKB=Q9JKX3	Tfr2	Transferrin receptor protein 2;Tfr2;ortholog
MOUSE|MGI=MGI=2442403|UniProtKB=Q8BGW6	Stk32a	Serine/threonine-protein kinase 32A;Stk32a;ortholog
MOUSE|MGI=MGI=105112|UniProtKB=Q91X72	Hpx	Hemopexin;Hpx;ortholog
MOUSE|MGI=MGI=2442484|UniProtKB=Q3TEL6	Rnf157	E3 ubiquitin ligase Rnf157;Rnf157;ortholog
MOUSE|MGI=MGI=1346053|UniProtKB=Q9EQF2	Kel	Kell blood group glycoprotein homolog;Kel;ortholog
MOUSE|MGI=MGI=1920209|UniProtKB=B2RT44	Lonrf2	LON peptidase N-terminal domain and ring finger 2;Lonrf2;ortholog
MOUSE|MGI=MGI=107202|UniProtKB=Q62388	Atm	Serine-protein kinase ATM;Atm;ortholog
MOUSE|MGI=MGI=2685973|UniProtKB=Q1PSW8	Trim71	E3 ubiquitin-protein ligase TRIM71;Trim71;ortholog
MOUSE|MGI=MGI=3612246|UniProtKB=P69525	Tmprss9	Transmembrane protease serine 9;Tmprss9;ortholog
MOUSE|MGI=MGI=1330861|UniProtKB=Q9JLM8	Dclk1	Serine/threonine-protein kinase DCLK1;Dclk1;ortholog
MOUSE|MGI=MGI=97598|UniProtKB=P28867	Sdk1	Protein kinase C delta type;Prkcd;ortholog
MOUSE|MGI=MGI=1201387|UniProtKB=O54949	Nlk	Serine/threonine-protein kinase NLK;Nlk;ortholog
MOUSE|MGI=MGI=1347557|UniProtKB=Q61241	Tssk1	Testis-specific serine/threonine-protein kinase 1;Tssk1b;ortholog
MOUSE|MGI=MGI=1321152|UniProtKB=Q99M80	Ptprt	Receptor-type tyrosine-protein phosphatase T;Ptprt;ortholog
MOUSE|MGI=MGI=1915596|UniProtKB=Q8K2C6	Sirt5	NAD-dependent protein deacylase sirtuin-5, mitochondrial;Sirt5;ortholog
MOUSE|MGI=MGI=103310|UniProtKB=P35822	Ptprk	Receptor-type tyrosine-protein phosphatase kappa;Ptprk;ortholog
MOUSE|MGI=MGI=1927086|UniProtKB=Q9ES00	Ube4b	Ubiquitin conjugation factor E4 B;Ube4b;ortholog
MOUSE|MGI=MGI=1196224|UniProtKB=Q8R3L8	Cdk8	Cyclin-dependent kinase 8;Cdk8;ortholog
MOUSE|MGI=MGI=88259|UniProtKB=Q923T9	Camk2g	Calcium/calmodulin-dependent protein kinase type II subunit gamma;Camk2g;ortholog
MOUSE|MGI=MGI=2685810|UniProtKB=Q7M758	Naaladl1	Aminopeptidase NAALADL1;Naaladl1;ortholog
MOUSE|MGI=MGI=1278336|UniProtKB=Q3UTQ8	Cdkl5	Cyclin-dependent kinase-like 5;Cdkl5;ortholog
MOUSE|MGI=MGI=1916347|UniProtKB=G3UY57	Trim15	Tripartite motif protein 15, isoform CRA_a;Trim15;ortholog
MOUSE|MGI=MGI=3583944|UniProtKB=Q3V3A1	Cdk15	Cyclin-dependent kinase 15;Cdk15;ortholog
MOUSE|MGI=MGI=2388073|UniProtKB=Q91VB2	Camk1g	Calcium/calmodulin-dependent protein kinase type 1G;Camk1g;ortholog
MOUSE|MGI=MGI=1355075|UniProtKB=Q9JLG8	Capn15	Calpain-15;Capn15;ortholog
MOUSE|MGI=MGI=2686594|UniProtKB=Q8BIK6	Tmprss7	Transmembrane protease serine 7;Tmprss7;ortholog
MOUSE|MGI=MGI=2661234|UniProtKB=Q80WM7	Prss33	Serine protease 33;Prss33;ortholog
MOUSE|MGI=MGI=2444521|UniProtKB=E9QAU8	Rnf165	E3 ubiquitin-protein ligase RNF165;Rnf165;ortholog
MOUSE|MGI=MGI=1919041|UniProtKB=Q6P8K8	Cpa4	Carboxypeptidase A4;Cpa4;ortholog
MOUSE|MGI=MGI=1916366|UniProtKB=A2AN08	Ubr4	E3 ubiquitin-protein ligase UBR4;Ubr4;ortholog
MOUSE|MGI=MGI=97514|UniProtKB=P29121	Pcsk4	Proprotein convertase subtilisin/kexin type 4;Pcsk4;ortholog
MOUSE|MGI=MGI=2153072|UniProtKB=Q6PCX9	Trim37	E3 ubiquitin-protein ligase TRIM37;Trim37;ortholog
MOUSE|MGI=MGI=1346861|UniProtKB=Q91Y86	Mapk8	Mitogen-activated protein kinase 8;Mapk8;ortholog
MOUSE|MGI=MGI=2444752|UniProtKB=Q6PGH0	Ubtd2	Ubiquitin domain-containing protein 2;Ubtd2;ortholog
MOUSE|MGI=MGI=2443157|UniProtKB=Q80SY4	Mib1	E3 ubiquitin-protein ligase MIB1;Mib1;ortholog
MOUSE|MGI=MGI=1345147|UniProtKB=Q9WUA6	Akt3	RAC-gamma serine/threonine-protein kinase;Akt3;ortholog
MOUSE|MGI=MGI=99549|UniProtKB=O08643	Gzmm	Granzyme M;Gzmm;ortholog
MOUSE|MGI=MGI=1924230|UniProtKB=A0PJN4	Ube2ql1	Ubiquitin-conjugating enzyme E2Q-like protein 1;Ube2ql1;ortholog
MOUSE|MGI=MGI=2442600|UniProtKB=Q4VC17	Adamts18	A disintegrin and metalloproteinase with thrombospondin motifs 18;Adamts18;ortholog
MOUSE|MGI=MGI=1919857|UniProtKB=Q5BKP2	Usp13	Ubiquitin carboxyl-terminal hydrolase 13;Usp13;ortholog
MOUSE|MGI=MGI=94921|UniProtKB=Q9Z218	Dpp6	Dipeptidyl aminopeptidase-like protein 6;Dpp6;ortholog
MOUSE|MGI=MGI=1861437|UniProtKB=Q9WV60	Gsk3b	Glycogen synthase kinase-3 beta;Gsk3b;ortholog
MOUSE|MGI=MGI=1347361|UniProtKB=O88676	Mmp23	Matrix metalloproteinase-23;Mmp23;ortholog
MOUSE|MGI=MGI=1918341|UniProtKB=Q8CEQ0	Cdkl1	Cyclin-dependent kinase-like 1;Cdkl1;ortholog
MOUSE|MGI=MGI=97815|UniProtKB=B0V2N1	Ptprs	Receptor-type tyrosine-protein phosphatase S;Ptprs;ortholog
MOUSE|MGI=MGI=2442875|UniProtKB=P59509	Adamts19	A disintegrin and metalloproteinase with thrombospondin motifs 19;Adamts19;ortholog
MOUSE|MGI=MGI=2652875|UniProtKB=Q80XP9	Wnk3	Serine/threonine-protein kinase WNK3;Wnk3;ortholog
MOUSE|MGI=MGI=1347357|UniProtKB=Q9QYK9	Pnck	Calcium/calmodulin-dependent protein kinase type 1B;Pnck;ortholog
MOUSE|MGI=MGI=1918395|UniProtKB=Q8K299	Scara5	Scavenger receptor class A member 5;Scara5;ortholog
MOUSE|MGI=MGI=1276539|UniProtKB=O88196	Ttc3	E3 ubiquitin-protein ligase TTC3;Ttc3;ortholog
MOUSE|MGI=MGI=1346321|UniProtKB=Q9R001	Adamts5	A disintegrin and metalloproteinase with thrombospondin motifs 5;Adamts5;ortholog
MOUSE|MGI=MGI=1926884|UniProtKB=Q7TMY8	Huwe1	E3 ubiquitin-protein ligase HUWE1;Huwe1;ortholog
MOUSE|MGI=MGI=1352744|UniProtKB=Q61010	Dtx1	E3 ubiquitin-protein ligase DTX1;Dtx1;ortholog
MOUSE|MGI=MGI=104731|UniProtKB=Q8CGQ2	Adam4	A disintegrin and metallopeptidase domain 4;Adam4;ortholog
MOUSE|MGI=MGI=2177191|UniProtKB=Q80YW5	Bspry	B box and SPRY domain-containing protein;Bspry;ortholog
MOUSE|MGI=MGI=2385336|UniProtKB=Q8QZV4	Stk32c	Serine/threonine-protein kinase 32C;Stk32c;ortholog
MOUSE|MGI=MGI=2441745|UniProtKB=Q09M02	Agbl5	Cytosolic carboxypeptidase-like protein 5;Agbl5;ortholog
MOUSE|MGI=MGI=97511|UniProtKB=P63239	Pcsk1	Neuroendocrine convertase 1;Pcsk1;ortholog
MOUSE|MGI=MGI=2444559|UniProtKB=Q6P5G0	Mapk4	Mitogen-activated protein kinase 4;Mapk4;ortholog
MOUSE|MGI=MGI=104730|UniProtKB=Q3TTE0	Adam5	Disintegrin and metalloproteinase domain-containing protein 5;Adam5;ortholog
MOUSE|MGI=MGI=107489|UniProtKB=P70669	Phex	Phosphate-regulating neutral endopeptidase PHEX;Phex;ortholog
MOUSE|MGI=MGI=2386139|UniProtKB=Q9EPX2	Papln	Papilin;Papln;ortholog
MOUSE|MGI=MGI=1859281|UniProtKB=Q9R098	Hgfac	Hepatocyte growth factor activator;Hgfac;ortholog
MOUSE|MGI=MGI=1347348|UniProtKB=D3Z1A5	Adamts6	A disintegrin-like and metallopeptidase (reprolysin type) with thrombospondin type 1 motif, 6;Adamts6;ortholog
MOUSE|MGI=MGI=2685946|UniProtKB=Q5RJI5	Brsk1	Serine/threonine-protein kinase BRSK1;Brsk1;ortholog
MOUSE|MGI=MGI=2444506|UniProtKB=Q8CHX6	Mbtps2	Membrane-bound transcription factor site-2 protease;Mbtps2;ortholog
MOUSE|MGI=MGI=2685391|UniProtKB=Q6P9L4	Usp49	Ubiquitin carboxyl-terminal hydrolase 49;Usp49;ortholog
MOUSE|MGI=MGI=1933831|UniProtKB=E9PUS2	Btbd2	BTB (POZ) domain-containing 2;Btbd2;ortholog
MOUSE|MGI=MGI=1338757|UniProtKB=Q9WUH5	Trim10	Tripartite motif-containing protein 10;Trim10;ortholog
MOUSE|MGI=MGI=1929914|UniProtKB=Q9D2E1	Tssk3	Testis-specific serine/threonine-protein kinase 3;Tssk3;ortholog
MOUSE|MGI=MGI=96968|UniProtKB=Q07646	Mest	Mesoderm-specific transcript protein;Mest;ortholog
MOUSE|MGI=MGI=3045323|UniProtKB=Q505D9	Trim67	Tripartite motif-containing protein 67;Trim67;ortholog
MOUSE|MGI=MGI=1354946|UniProtKB=Q61532	Mapk6	Mitogen-activated protein kinase 6;Mapk6;ortholog
MOUSE|MGI=MGI=2158736|UniProtKB=Q9EP97	Senp3	Sentrin-specific protease 3;Senp3;ortholog
MOUSE|MGI=MGI=88258|UniProtKB=P08414	Camk4	Calcium/calmodulin-dependent protein kinase type IV;Camk4;ortholog
MOUSE|MGI=MGI=1861901|UniProtKB=Q9R1L5	Mast1	Microtubule-associated serine/threonine-protein kinase 1;Mast1;ortholog
MOUSE|MGI=MGI=109320|UniProtKB=O54732	Mmp15	Matrix metalloproteinase-15;Mmp15;ortholog
MOUSE|MGI=MGI=2685541|UniProtKB=Q80ZK9	Wdtc1	WD and tetratricopeptide repeats protein 1;Wdtc1;ortholog
MOUSE|MGI=MGI=107247|UniProtKB=O35227	Adam7	Disintegrin and metalloproteinase domain-containing protein 7;Adam7;ortholog
MOUSE|MGI=MGI=2155779|UniProtKB=Q3UVR3	Ttbk2,Ttbk1	Tau-tubulin kinase 2;Ttbk2;ortholog
MOUSE|MGI=MGI=1347559|UniProtKB=O54863	Tssk2	Testis-specific serine/threonine-protein kinase 2;Tssk2;ortholog
MOUSE|MGI=MGI=1098667|UniProtKB=Q9R1V4	Adam11	Disintegrin and metalloproteinase domain-containing protein 11;Adam11;ortholog
MOUSE|MGI=MGI=1914338|UniProtKB=Q6ZQ73	Cand2	Cullin-associated NEDD8-dissociated protein 2;Cand2;ortholog
MOUSE|MGI=MGI=2384311|UniProtKB=Q8K093	Trhde	Thyrotropin-releasing hormone-degrading ectoenzyme;Trhde;ortholog
MOUSE|MGI=MGI=1330832|UniProtKB=Q91WP0	Masp2	Mannan-binding lectin serine protease 2;Masp2;ortholog
MOUSE|MGI=MGI=2135752|UniProtKB=Q80V91	Dtx3	Probable E3 ubiquitin-protein ligase DTX3;Dtx3;ortholog
MOUSE|MGI=MGI=1101358|UniProtKB=Q11011	Npepps	Puromycin-sensitive aminopeptidase;Npepps;ortholog
MOUSE|MGI=MGI=88558|UniProtKB=Q9ER05	Ctrl	Chymopasin;Ctrl;ortholog
MOUSE|MGI=MGI=88257|UniProtKB=P28652	Camk2b	Calcium/calmodulin-dependent protein kinase type II subunit beta;Camk2b;ortholog
MOUSE|MGI=MGI=1915155|UniProtKB=Q8BU27	Ppm1e	Protein phosphatase 1M;Ppm1m;ortholog
MOUSE|MGI=MGI=97004|UniProtKB=Q61391	Mme	Neprilysin;Mme;ortholog
MOUSE|MGI=MGI=1933754|UniProtKB=Q8CFI0	Nedd4l	E3 ubiquitin-protein ligase NEDD4-like;Nedd4l;ortholog
MOUSE|MGI=MGI=1921092|UniProtKB=Q5NCX5	Neurl4	Neuralized-like protein 4;Neurl4;ortholog
MOUSE|MGI=MGI=2685214|UniProtKB=Q6PAQ9	Prrg3	Transmembrane gamma-carboxyglutamic acid protein 3;Prrg3;ortholog
MOUSE|MGI=MGI=2147036|UniProtKB=Q6PCN3	Ttbk1	Tau-tubulin kinase 1;Ttbk1;ortholog
MOUSE|MGI=MGI=1919742|UniProtKB=Q8BKX6	Smg1	Serine/threonine-protein kinase SMG1;Smg1;ortholog
MOUSE|MGI=MGI=2137630|UniProtKB=Q9ESG9	Myt1	Membrane-associated tyrosine- and threonine-specific cdc2-inhibitory kinase;Pkmyt1;ortholog
MOUSE|MGI=MGI=107412|UniProtKB=P52483	Ube2e3	Ubiquitin-conjugating enzyme E2 E3;Ube2e3;ortholog
MOUSE|MGI=MGI=2685008|UniProtKB=Q3V016	Hipk4	Homeodomain-interacting protein kinase 4;Hipk4;ortholog
MOUSE|MGI=MGI=2136459|UniProtKB=Q7TT50	Cdc42bpb	Serine/threonine-protein kinase MRCK beta;Cdc42bpb;ortholog
MOUSE|MGI=MGI=2444115|UniProtKB=Q8K4P8	Hecw1	E3 ubiquitin-protein ligase HECW1;Hecw1;ortholog
MOUSE|MGI=MGI=2387432|UniProtKB=Q8JZK6	Trim61	MCG22896, isoform CRA_b;Trim61;ortholog
MOUSE|MGI=MGI=3606211|UniProtKB=Q8BV57	Ssc5d	Soluble scavenger receptor cysteine-rich domain-containing protein SSC5D;Ssc5d;ortholog
MOUSE|MGI=MGI=2384296|UniProtKB=Q3UHL1	Camkv	CaM kinase-like vesicle-associated protein;Camkv;ortholog
MOUSE|MGI=MGI=1916885|UniProtKB=Q80YE7	Dapk1	Death-associated protein kinase 1;Dapk1;ortholog
MOUSE|MGI=MGI=2147134|UniProtKB=Q7TPD1	Fbxo11	F-box only protein 11;Fbxo11;ortholog
MOUSE|MGI=MGI=97599|UniProtKB=P16054	Prkce	Protein kinase C epsilon type;Prkce;ortholog
MOUSE|MGI=MGI=2146046|UniProtKB=Q811B3	Adamts12	A disintegrin and metalloproteinase with thrombospondin motifs 12;Adamts12;ortholog
MOUSE|MGI=MGI=1100537|UniProtKB=O70583	Mid1	E3 ubiquitin-protein ligase Midline-1;Mid1;ortholog
MOUSE|MGI=MGI=1335093|UniProtKB=Q9Z176	Ppp2r3d	Serine/threonine-protein phosphatase 2A regulatory subunit B'' subunit delta;Ppp2r3d;ortholog
MOUSE|MGI=MGI=1923020|UniProtKB=Q69Z98	Brsk2	Serine/threonine-protein kinase BRSK2;Brsk2;ortholog
MOUSE|MGI=MGI=2156378|UniProtKB=A2RT81	Rnf39	MCG22610;Rnf39;ortholog
MOUSE|MGI=MGI=1918878|UniProtKB=Q504M2	Pdp2	MCG53395;Pdp2;ortholog
MOUSE|MGI=MGI=1891884|UniProtKB=Q9JHR9	Nrip2	Nuclear receptor-interacting protein 2;Nrip2;ortholog
MOUSE|MGI=MGI=97620|UniProtKB=P20918	Plg	Plasminogen;Plg;ortholog
MOUSE|MGI=MGI=2153062|UniProtKB=Q8CGV8	Mmp28	Matrix metallopeptidase 28 (epilysin);Mmp28;ortholog
MOUSE|MGI=MGI=1351645|UniProtKB=Q8CIG8	Prmt5	Protein arginine N-methyltransferase 5;Prmt5;ortholog
MOUSE|MGI=MGI=97297|UniProtKB=P46935	Nedd4	E3 ubiquitin-protein ligase NEDD4;Nedd4;ortholog
MOUSE|MGI=MGI=2444096|UniProtKB=Q80TL0	Ppm1e	Protein phosphatase 1E;Ppm1e;ortholog
MOUSE|MGI=MGI=1330301|UniProtKB=Q5U4C9	Dyrk2	Dual specificity tyrosine-phosphorylation-regulated kinase 2;Dyrk2;ortholog
MOUSE|MGI=MGI=1916703|UniProtKB=F2YMG0	Prss56	Serine protease 56;Prss56;ortholog
MOUSE|MGI=MGI=1270126|UniProtKB=O70405	Ulk1	Serine/threonine-protein kinase ULK1;Ulk1;ortholog
MOUSE|MGI=MGI=1918012|UniProtKB=Q6PGN3	Dclk2	Serine/threonine-protein kinase DCLK2;Dclk2;ortholog
MOUSE|MGI=MGI=3588216|UniProtKB=B1AUC4	Ube2u	Ubiquitin-conjugating enzyme E2U (putative);Ube2u;ortholog
MOUSE|MGI=MGI=894681|UniProtKB=P70398	Usp9x	Probable ubiquitin carboxyl-terminal hydrolase FAF-X;Usp9x;ortholog
MOUSE|MGI=MGI=2685630|UniProtKB=Q6DFV6	Fndc3c1	Fibronectin type III domain containing protein 3C1;Fndc3c1;ortholog
MOUSE|MGI=MGI=2652890|UniProtKB=Q571E5	Prss53	Serine protease 53;Prss53;ortholog
MOUSE|MGI=MGI=2384312|UniProtKB=Q99K46	Usp11	Ubiquitin carboxyl-terminal hydrolase 11;Usp11;ortholog
MOUSE|MGI=MGI=1919834|UniProtKB=A2A432	Cul4b	Cullin-4B;Cul4b;ortholog
MOUSE|MGI=MGI=97512|UniProtKB=P21661	Pcsk2	Neuroendocrine convertase 2;Pcsk2;ortholog
MOUSE|MGI=MGI=102695|UniProtKB=A2A8L5	Ptprf	Receptor-type tyrosine-protein phosphatase F;Ptprf;ortholog
MOUSE|MGI=MGI=1351603|UniProtKB=Q9JLI3	Mmel1	Membrane metallo-endopeptidase-like 1;Mmel1;ortholog
MOUSE|MGI=MGI=97008|UniProtKB=Q02853	Mmp11	Stromelysin-3;Mmp11;ortholog
MOUSE|MGI=MGI=1098687|UniProtKB=Q3UHJ0	Aak1	AP2-associated protein kinase 1;Aak1;ortholog
MOUSE|MGI=MGI=894676|UniProtKB=Q60592	Mast2	Microtubule-associated serine/threonine-protein kinase 2;Mast2;ortholog
MOUSE|MGI=MGI=2685924|UniProtKB=P0C5K0	Sbk3	Uncharacterized serine/threonine-protein kinase SBK3;Sbk3;ortholog
MOUSE|MGI=MGI=1346076|UniProtKB=Q9R0S3	Mmp17	Matrix metalloproteinase-17;Mmp17;ortholog
MOUSE|MGI=MGI=94906|UniProtKB=P54265	Dmpk	Myotonin-protein kinase;Dmpk;ortholog
MOUSE|MGI=MGI=87884|UniProtKB=P23578	Acr	Acrosin;Acr;ortholog
MOUSE|MGI=MGI=3646380|UniProtKB=B2RUD9	Gm4787	MCG140564;Gm4787;ortholog
MOUSE|MGI=MGI=3644687|UniProtKB=E9PXF3	Gm5415	Predicted gene 5415;Gm5415;ortholog
MOUSE|MGI=MGI=3617840|UniProtKB=Q504N0	Cpa2	Carboxypeptidase A2;Cpa2;ortholog
MOUSE|MGI=MGI=1098801|UniProtKB=B2RRE7	Otud4	OTU domain-containing protein 4;Otud4;ortholog
MOUSE|MGI=MGI=3588195|UniProtKB=E9Q4D1	Adamts17	A disintegrin-like and metallopeptidase (reprolysin type) with thrombospondin type 1 motif, 17;Adamts17;ortholog
MOUSE|MGI=MGI=1349391|UniProtKB=Q9QUL7	Tpsg1	Tryptase gamma;Tpsg1;ortholog
MOUSE|MGI=MGI=3045353|UniProtKB=E9Q287	Adamts3	A disintegrin-like and metallopeptidase (reprolysin type) with thrombospondin type 1 motif, 3;Adamts3;ortholog
MOUSE|MGI=MGI=1918253|UniProtKB=Q920S2	Prss41	Serine protease 41;Prss41;ortholog
MOUSE|MGI=MGI=2673000|UniProtKB=Q7TNM2	Trim46	Tripartite motif-containing protein 46;Trim46;ortholog
MOUSE|MGI=MGI=88492|UniProtKB=P98064	Masp1	Mannan-binding lectin serine protease 1;Masp1;ortholog
MOUSE|MGI=MGI=2443413|UniProtKB=Q8R2S1	Rps6kl1	Ribosomal protein S6 kinase-like 1;Rps6kl1;ortholog
MOUSE|MGI=MGI=2153272|UniProtKB=Q80YV3	Trrap	Transformation/transcription domain-associated protein;Trrap;ortholog
MOUSE|MGI=MGI=1919840|UniProtKB=Q8BVQ5	Ppme1	Protein phosphatase methylesterase 1;Ppme1;ortholog
MOUSE|MGI=MGI=1351660|UniProtKB=Q9JMK2	Csnk1e	Casein kinase I isoform epsilon;Csnk1e;ortholog
MOUSE|MGI=MGI=1343461|UniProtKB=Q9JMI0	Ecel1	Endothelin-converting enzyme-like 1;Ecel1;ortholog
MOUSE|MGI=MGI=1341867|UniProtKB=Q9R0S2	Mmp24	Matrix metalloproteinase-24;Mmp24;ortholog
MOUSE|MGI=MGI=1917728|UniProtKB=A6H611	Mip	Mitochondrial intermediate peptidase;Mipep;ortholog
MOUSE|MGI=MGI=2449569|UniProtKB=P59384	Adamts15	A disintegrin and metalloproteinase with thrombospondin motifs 15;Adamts15;ortholog
MOUSE|MGI=MGI=88256|UniProtKB=P11798	Camk2a	Calcium/calmodulin-dependent protein kinase type II subunit alpha;Camk2a;ortholog
MOUSE|MGI=MGI=1925226|UniProtKB=Q641K5	Nuak1	NUAK family SNF1-like kinase 1;Nuak1;ortholog
MOUSE|MGI=MGI=1333883|UniProtKB=Q8BYR2	Lats1	Serine/threonine-protein kinase LATS1;Lats1;ortholog
MOUSE|MGI=MGI=96080|UniProtKB=P26928	Mst1	Hepatocyte growth factor-like protein;Mst1;ortholog
MOUSE|MGI=MGI=1352490|UniProtKB=Q6J756	Capn11	Calpain-11;Capn11;ortholog
MOUSE|MGI=MGI=3026877|UniProtKB=E9Q0N2	Ptprh	Receptor-type tyrosine-protein phosphatase H;Ptprh;ortholog
MOUSE|MGI=MGI=2135937|UniProtKB=Q8QZX0	Sbk1	Serine/threonine-protein kinase SBK1;Sbk1;ortholog
MOUSE|MGI=MGI=109473|UniProtKB=Q6ZQ93	Usp34	Ubiquitin carboxyl-terminal hydrolase 34;Usp34;ortholog
Transporter (PC00227)
MOUSE|MGI=MGI=1888498|UniProtKB=Q9JLF1	Gabrq	Gamma-aminobutyric acid receptor subunit theta;Gabrq;ortholog
MOUSE|MGI=MGI=2153182|UniProtKB=P58390	Kcnn2	Small conductance calcium-activated potassium channel protein 2;Kcnn2;ortholog
MOUSE|MGI=MGI=2147279|UniProtKB=Q8C145	Slc39a6	Zinc transporter ZIP6;Slc39a6;ortholog
MOUSE|MGI=MGI=2443431|UniProtKB=E9PVD9	Slco5a1	Solute carrier organic anion transporter family member;Slco5a1;ortholog
MOUSE|MGI=MGI=2445299|UniProtKB=Q8K4D3	Slc36a1	Proton-coupled amino acid transporter 1;Slc36a1;ortholog
MOUSE|MGI=MGI=2178051|UniProtKB=E9Q7P2	Cacna1i	Voltage-dependent T-type calcium channel subunit alpha;Cacna1i;ortholog
MOUSE|MGI=MGI=1345278|UniProtKB=Q61672	Slc29a2	Equilibrative nucleoside transporter 2;Slc29a2;ortholog
MOUSE|MGI=MGI=106215|UniProtKB=Q9WTY4	Aqp5	Aquaporin-5;Aqp5;ortholog
MOUSE|MGI=MGI=1352629|UniProtKB=B2RUS7	Abcc8	ATP-binding cassette, sub-family C (CFTR/MRP), member 8;Abcc8;ortholog
MOUSE|MGI=MGI=2384860|UniProtKB=Q921V7	Slc44a3	Choline transporter-like protein 3;Slc44a3;ortholog
MOUSE|MGI=MGI=1201678|UniProtKB=Q5SUF7	Cacna1g	Voltage-dependent T-type calcium channel subunit alpha;Cacna1g;ortholog
MOUSE|MGI=MGI=1097160|UniProtKB=Q3UR32	P2rx3	P2X purinoceptor 3;P2rx3;ortholog
MOUSE|MGI=MGI=2147363|UniProtKB=Q6PGE7	Slc6a7	Sodium-dependent proline transporter;Slc6a7;ortholog
MOUSE|MGI=MGI=1927259|UniProtKB=Q91WD2	Trpv6	Transient receptor potential cation channel subfamily V member 6;Trpv6;ortholog
MOUSE|MGI=MGI=2443515|UniProtKB=G5E8K6	Slc16a5	Monocarboxylate transporter 6;Slc16a5;ortholog
MOUSE|MGI=MGI=98248|UniProtKB=B1AWN6	Scn2a	Sodium channel protein type 2 subunit alpha;Scn2a;ortholog
MOUSE|MGI=MGI=99828|UniProtKB=P18581	Slc7a2	Cationic amino acid transporter 2;Slc7a2;ortholog
MOUSE|MGI=MGI=2684326|UniProtKB=G3X943	Slc39a2	MCG18706, isoform CRA_b;Slc39a2;ortholog
MOUSE|MGI=MGI=1913396|UniProtKB=Q7TQE6	Maco1	Macoilin;Maco1;ortholog
MOUSE|MGI=MGI=2442850|UniProtKB=Q5NCM1	Slc17a4	Probable small intestine urate exporter;Slc17a4;ortholog
MOUSE|MGI=MGI=2386976|UniProtKB=Q8R4P9	Abcc10	Multidrug resistance-associated protein 7;Abcc10;ortholog
MOUSE|MGI=MGI=2159339|UniProtKB=Q6X1Y6	Asic3	Acid-sensing ion channel 3;Asic3;ortholog
MOUSE|MGI=MGI=96285|UniProtKB=Q60857	Htt	Sodium-dependent serotonin transporter;Slc6a4;ortholog
MOUSE|MGI=MGI=98251|UniProtKB=Q9JJV9	Scn5a	Sodium channel protein type 5 subunit alpha;Scn5a;ortholog
MOUSE|MGI=MGI=2663709|UniProtKB=Q5NC32	Slc16a11	Monocarboxylate transporter 11;Slc16a11;ortholog
MOUSE|MGI=MGI=1929706|UniProtKB=Q99NF8	Ranbp17	Ran-binding protein 17;Ranbp17;ortholog
MOUSE|MGI=MGI=97932|UniProtKB=Q9Z0U0	Xpr1	Xenotropic and polytropic retrovirus receptor 1;Xpr1;ortholog
MOUSE|MGI=MGI=1353474|UniProtKB=Q9QZ03	Slc39a1	Zinc transporter ZIP1;Slc39a1;ortholog
MOUSE|MGI=MGI=1924845|UniProtKB=Q9D2F7	Nup210l	Nuclear pore membrane glycoprotein 210-like;Nup210l;ortholog
MOUSE|MGI=MGI=2145895|UniProtKB=Q8K2P7	Slc38a1	Sodium-coupled neutral amino acid transporter 1;Slc38a1;ortholog
MOUSE|MGI=MGI=2138987|UniProtKB=A2AJN7	Slc4a11	Sodium bicarbonate transporter-like protein 11;Slc4a11;ortholog
MOUSE|MGI=MGI=1347358|UniProtKB=O88561	Slc27a3	Solute carrier family 27 member 3;Slc27a3;ortholog
MOUSE|MGI=MGI=1345280|UniProtKB=P97441	Slc30a3	Zinc transporter 3;Slc30a3;ortholog
MOUSE|MGI=MGI=2665170|UniProtKB=Q8K3P1	P2rx2	P2X purinoceptor 2;P2rx2;ortholog
MOUSE|MGI=MGI=109525|UniProtKB=Q9QUQ5	Trpc4	Short transient receptor potential channel 4;Trpc4;ortholog
MOUSE|MGI=MGI=1347353|UniProtKB=Q0VF55	Atp2b3	Calcium-transporting ATPase;Atp2b3;ortholog
MOUSE|MGI=MGI=2181182|UniProtKB=Q99P88	Nup155	Nuclear pore complex protein Nup155;Nup155;ortholog
MOUSE|MGI=MGI=95747|UniProtKB=Q64018	Glra1	Glycine receptor subunit alpha-1;Glra1;ortholog
MOUSE|MGI=MGI=1916025|UniProtKB=Q99L60	Atp6v1c2	V-type proton ATPase subunit C 2;Atp6v1c2;ortholog
MOUSE|MGI=MGI=2653235|UniProtKB=Q8BIV7	Slc45a1	Proton-associated sugar transporter A;Slc45a1;ortholog
MOUSE|MGI=MGI=95750|UniProtKB=Q61603	Glra4	Glycine receptor subunit alpha-4;Glra4;ortholog
MOUSE|MGI=MGI=2442535|UniProtKB=Q8BJI1	Slc6a17	Sodium-dependent neutral amino acid transporter SLC6A17;Slc6a17;ortholog
MOUSE|MGI=MGI=108029|UniProtKB=Q6QIY3	Scn10a	Sodium channel protein type 10 subunit alpha;Scn10a;ortholog
MOUSE|MGI=MGI=2685542|UniProtKB=B2RXE2	Slc9a5	Sodium/hydrogen exchanger;Slc9a5;ortholog
MOUSE|MGI=MGI=2685565|UniProtKB=A2AG10	Nup62cl	Nucleoporin 62 C-terminal-like;Nup62cl;ortholog
MOUSE|MGI=MGI=96990|UniProtKB=P51180	Mip	Lens fiber major intrinsic protein;Mip;ortholog
MOUSE|MGI=MGI=88108|UniProtKB=P14094	Atp1b1	Sodium/potassium-transporting ATPase subunit beta-1;Atp1b1;ortholog
MOUSE|MGI=MGI=2443384|UniProtKB=E9PUP3	Slc4a9	Anion exchange protein;Slc4a9;ortholog
MOUSE|MGI=MGI=2385330|UniProtKB=Q8R139	Slc29a4	Equilibrative nucleoside transporter 4;Slc29a4;ortholog
MOUSE|MGI=MGI=103169|UniProtKB=Q9WTU3	Scn8a	Sodium channel protein type 8 subunit alpha;Scn8a;ortholog
MOUSE|MGI=MGI=2150150|UniProtKB=Q5DTL9	Slc4a10	Sodium-driven chloride bicarbonate exchanger;Slc4a10;ortholog
MOUSE|MGI=MGI=1919663|UniProtKB=Q9CZM9	Kcnmb2	Calcium-activated potassium channel subunit beta-2;Kcnmb2;ortholog
MOUSE|MGI=MGI=1919336|UniProtKB=Q9D856	Slc39a5	Zinc transporter ZIP5;Slc39a5;ortholog
MOUSE|MGI=MGI=2652846|UniProtKB=Q7TNS7	Asic4	Acid-sensing ion channel 4;Asic4;ortholog
MOUSE|MGI=MGI=1347100|UniProtKB=Q4LDG0	Slc27a5	Bile acyl-CoA synthetase;Slc27a5;ortholog
MOUSE|MGI=MGI=1334416|UniProtKB=O88396	Grpel2	GrpE protein homolog 2, mitochondrial;Grpel2;ortholog
MOUSE|MGI=MGI=1927128|UniProtKB=Q5F297	Slc35g3	Solute carrier family 35 member G3;Slc35g3;ortholog
MOUSE|MGI=MGI=95617|UniProtKB=Q8BHJ7	Gabra5	Gamma-aminobutyric acid receptor subunit alpha-5;Gabra5;ortholog
MOUSE|MGI=MGI=98249|UniProtKB=A2ASI5	Scn3a	Sodium channel protein type 3 subunit alpha;Scn3a;ortholog
MOUSE|MGI=MGI=2152414|UniProtKB=Q9EPL8	Ipo7	Importin-7;Ipo7;ortholog
MOUSE|MGI=MGI=2384851|UniProtKB=Q75N73	Slc39a14	Zinc transporter ZIP14;Slc39a14;ortholog
MOUSE|MGI=MGI=1918882|UniProtKB=Q8BHK2	Scn3b	Sodium channel subunit beta-3;Scn3b;ortholog
MOUSE|MGI=MGI=1890457|UniProtKB=Q9ES07	Slc15a2	Solute carrier family 15 member 2;Slc15a2;ortholog
MOUSE|MGI=MGI=1890500|UniProtKB=Q8R4F0	Mcoln3	Mucolipin-3;Mcoln3;ortholog
MOUSE|MGI=MGI=2156538|UniProtKB=Q8R526	Pkd1l1	Polycystic kidney disease protein 1-like 1;Pkd1l1;ortholog
MOUSE|MGI=MGI=1859661|UniProtKB=Q9QZW0	Atp11c	Phospholipid-transporting ATPase 11C;Atp11c;ortholog
MOUSE|MGI=MGI=99684|UniProtKB=A2AGL3	Ryr3	Ryanodine receptor 3;Ryr3;ortholog
MOUSE|MGI=MGI=107532|UniProtKB=P70168	Kpnb1	Importin subunit beta-1;Kpnb1;ortholog
MOUSE|MGI=MGI=2181435|UniProtKB=Q8R4D5	Trpm8	Transient receptor potential cation channel subfamily M member 8;Trpm8;ortholog
MOUSE|MGI=MGI=1925589|UniProtKB=Q6P5F7	Ttyh3	Protein tweety homolog 3;Ttyh3;ortholog
MOUSE|MGI=MGI=1349470|UniProtKB=Q9WVC5	Trpc7	Short transient receptor potential channel 7;Trpc7;ortholog
MOUSE|MGI=MGI=1927379|UniProtKB=Q8BUX5	Rhbg	Ammonium transporter Rh type B;Rhbg;ortholog
MOUSE|MGI=MGI=107636|UniProtKB=Q62205	Scn9a	Sodium channel protein type 9 subunit alpha;Scn9a;ortholog
MOUSE|MGI=MGI=106926|UniProtKB=O08601	Mttp	Microsomal triglyceride transfer protein large subunit;Mttp;ortholog
MOUSE|MGI=MGI=1330305|UniProtKB=Q2TV84	Trpm1	Transient receptor potential cation channel subfamily M member 1;Trpm1;ortholog
MOUSE|MGI=MGI=2443342|UniProtKB=Q3UUQ7	Pgap1	GPI inositol-deacylase;Pgap1;ortholog
MOUSE|MGI=MGI=1351619|UniProtKB=Q9QY30	Abcb11	Bile salt export pump;Abcb11;ortholog
MOUSE|MGI=MGI=2384849|UniProtKB=Q99LG2	Tnpo2	Transportin-2;Tnpo2;ortholog
MOUSE|MGI=MGI=109526|UniProtKB=Q9QZC1	Trpc3	Short transient receptor potential channel 3;Trpc3;ortholog
MOUSE|MGI=MGI=2676312|UniProtKB=E9Q876	Abca12	ATP-binding cassette, sub-family A (ABC1), member 12;Abca12;ortholog
MOUSE|MGI=MGI=2144215|UniProtKB=Q8BVN7	Slc25a41	Solute carrier family 25 member 41;Slc25a41;ortholog
MOUSE|MGI=MGI=109393|UniProtKB=P04919	Slc4a1	Band 3 anion transport protein;Slc4a1;ortholog
MOUSE|MGI=MGI=104653|UniProtKB=G5E829	Atp2b1	Plasma membrane calcium-transporting ATPase 1;Atp2b1;ortholog
MOUSE|MGI=MGI=95620|UniProtKB=P63137	Gabrb2	Gamma-aminobutyric acid receptor subunit beta-2;Gabrb2;ortholog
MOUSE|MGI=MGI=87888|UniProtKB=O70174	Chrna4	Neuronal acetylcholine receptor subunit alpha-4;Chrna4;ortholog
MOUSE|MGI=MGI=105090|UniProtKB=Q761V0	Slc6a5	Sodium- and chloride-dependent glycine transporter 2;Slc6a5;ortholog
MOUSE|MGI=MGI=2442940|UniProtKB=Q8BYR8	Slc41a2	Solute carrier family 41 member 2;Slc41a2;ortholog
MOUSE|MGI=MGI=1917272|UniProtKB=A0A0J9YUX7	Slc23a4	Solute carrier family 23 member 4;Slc23a4;ortholog
MOUSE|MGI=MGI=1347099|UniProtKB=O35488	Slc27a2	Very long-chain acyl-CoA synthetase;Slc27a2;ortholog
MOUSE|MGI=MGI=2685930|UniProtKB=A0A1L1SR47	Slc6a16	Solute carrier family 6, member 16;Slc6a16;ortholog
MOUSE|MGI=MGI=1351617|UniProtKB=Q8R420	Abca3	ATP-binding cassette sub-family A member 3;Abca3;ortholog
MOUSE|MGI=MGI=1890226|UniProtKB=Q9D164	Fxyd6	FXYD domain-containing ion transport regulator 6;Fxyd6;ortholog
MOUSE|MGI=MGI=2681523|UniProtKB=Q8BFY9	Tnpo1	Transportin-1;Tnpo1;ortholog
MOUSE|MGI=MGI=1194915|UniProtKB=Q6NXK8	Asic1	Acid-sensing ion channel 1;Asic1;ortholog
MOUSE|MGI=MGI=87892|UniProtKB=Q8R493	Chrnb4	Neuronal acetylcholine receptor subunit beta-4;Chrnb4;ortholog
MOUSE|MGI=MGI=1889005|UniProtKB=Q9D2W0	Fxyd4	FXYD domain-containing ion transport regulator 4;Fxyd4;ortholog
MOUSE|MGI=MGI=1859660|UniProtKB=P98199	Atp8b2	Phospholipid-transporting ATPase ID;Atp8b2;ortholog
MOUSE|MGI=MGI=1891123|UniProtKB=Q9D808	Kcne2	Potassium voltage-gated channel subfamily E member 2;Kcne2;ortholog
MOUSE|MGI=MGI=95748|UniProtKB=Q7TNC8	Glra2	Glycine receptor subunit alpha-2;Glra2;ortholog
MOUSE|MGI=MGI=109523|UniProtKB=Q61143	Trpc6	Short transient receptor potential channel 6;Trpc6;ortholog
MOUSE|MGI=MGI=2153480|UniProtKB=Q920R6	Atp6v0a4	V-type proton ATPase 116 kDa subunit a isoform 4;Atp6v0a4;ortholog
MOUSE|MGI=MGI=1920211|UniProtKB=Q3TXX4	Slc17a7	Vesicular glutamate transporter 1;Slc17a7;ortholog
MOUSE|MGI=MGI=1929519|UniProtKB=O35308	Slc16a8	Monocarboxylate transporter 3;Slc16a8;ortholog
MOUSE|MGI=MGI=88113|UniProtKB=Q64436	Atp4a	Potassium-transporting ATPase alpha chain 1;Atp4a;ortholog
MOUSE|MGI=MGI=2441679|UniProtKB=Q80WJ6	Abcc12	Multidrug resistance-associated protein 9;Abcc12;ortholog
MOUSE|MGI=MGI=1919055|UniProtKB=Q8BJ71	Nup93	Nuclear pore complex protein Nup93;Nup93;ortholog
MOUSE|MGI=MGI=1101061|UniProtKB=O35304	Slc18a3	Vesicular acetylcholine transporter;Slc18a3;ortholog
MOUSE|MGI=MGI=2443511|UniProtKB=A1L3P4	Slc9a6	Sodium/hydrogen exchanger;Slc9a6;ortholog
MOUSE|MGI=MGI=3606480|UniProtKB=Q3UEZ8	Slc10a4	Sodium/bile acid cotransporter 4;Slc10a4;ortholog
MOUSE|MGI=MGI=1891430|UniProtKB=Q8BHK3	Slc36a2	Proton-coupled amino acid transporter 2;Slc36a2;ortholog
MOUSE|MGI=MGI=1351668|UniProtKB=Q8K440	Abca8b	ATP-binding cassette sub-family A member 8-B;Abca8b;ortholog
MOUSE|MGI=MGI=3580298|UniProtKB=Q6H1V1	Best3	Bestrophin-3;Best3;ortholog
MOUSE|MGI=MGI=1345284|UniProtKB=Q60825	Slc34a1	Sodium-dependent phosphate transport protein 2A;Slc34a1;ortholog
MOUSE|MGI=MGI=1341204|UniProtKB=Q8C4A0	Aqp6	Aquaporin-6;Aqp6;ortholog
MOUSE|MGI=MGI=106684|UniProtKB=Q8R090	Vat1	Chromaffin granule amine transporter;Slc18a1;ortholog
MOUSE|MGI=MGI=99685|UniProtKB=E9Q401	Ryr2	Ryanodine receptor 2;Ryr2;ortholog
MOUSE|MGI=MGI=87887|UniProtKB=Q8R4G9	Chrna3	Neuronal acetylcholine receptor subunit alpha-3;Chrna3;ortholog
MOUSE|MGI=MGI=2447362|UniProtKB=Q8CGQ8	Slc24a4	Sodium/potassium/calcium exchanger 4;Slc24a4;ortholog
MOUSE|MGI=MGI=1923001|UniProtKB=Q8VI75	Ipo4	Importin-4;Ipo4;ortholog
MOUSE|MGI=MGI=1916852|UniProtKB=Q80UF9	Otop3	Proton channel OTOP3;Otop3;ortholog
MOUSE|MGI=MGI=2147716|UniProtKB=Q8BGC3	Slc16a12	Monocarboxylate transporter 12;Slc16a12;ortholog
MOUSE|MGI=MGI=2156052|UniProtKB=Q8BLE7	Slc17a6	Vesicular glutamate transporter 2;Slc17a6;ortholog
MOUSE|MGI=MGI=98246|UniProtKB=A2APX8	Scn1a	Sodium channel protein type 1 subunit alpha;Scn1a;ortholog
MOUSE|MGI=MGI=3039629|UniProtKB=Q8BFU8	Slc17a8	Vesicular glutamate transporter 3;Slc17a8;ortholog
MOUSE|MGI=MGI=1351901|UniProtKB=Q91YD4	Trpc7	Transient receptor potential cation channel subfamily M member 2;Trpm2;ortholog
MOUSE|MGI=MGI=1096331|UniProtKB=O35544	Slc1a6	Excitatory amino acid transporter 4;Slc1a6;ortholog
MOUSE|MGI=MGI=1100867|UniProtKB=Q925H0	Bnc1	Acid-sensing ion channel 2;Asic2;ortholog
MOUSE|MGI=MGI=99779|UniProtKB=P49582	Chrna7	Neuronal acetylcholine receptor subunit alpha-7;Chrna7;ortholog
MOUSE|MGI=MGI=87891|UniProtKB=Q9ERK7	Chrnb2	Neuronal acetylcholine receptor subunit beta-2;Chrnb2;ortholog
Metabolite interconversion enzyme (PC00262)
MOUSE|MGI=MGI=88019|UniProtKB=P00687	Amy1	Alpha-amylase 1;Amy1;ortholog
MOUSE|MGI=MGI=109599|UniProtKB=O08650	Has3	Hyaluronan synthase 3;Has3;ortholog
MOUSE|MGI=MGI=3605455|UniProtKB=Q8VCH0	Acaa1b	3-ketoacyl-CoA thiolase B, peroxisomal;Acaa1b;ortholog
MOUSE|MGI=MGI=2151164|UniProtKB=A2ART8	Tgm7	Transglutaminase 7;Tgm7;ortholog
MOUSE|MGI=MGI=99538|UniProtKB=Q3UNX5	Acsm3	Acyl-coenzyme A synthetase ACSM3, mitochondrial;Acsm3;ortholog
MOUSE|MGI=MGI=107673|UniProtKB=P45377	Akr1b8	Aldose reductase-related protein 2;Akr1b8;ortholog
MOUSE|MGI=MGI=2444315|UniProtKB=Q8BFZ6	Idi2	Isopentenyl-diphosphate delta-isomerase 2;Idi2;ortholog
MOUSE|MGI=MGI=1347050|UniProtKB=O35945	Aldh1a7	Aldehyde dehydrogenase, cytosolic 1;Aldh1a7;ortholog
MOUSE|MGI=MGI=894701|UniProtKB=Q8R4G6	Mgat5	Alpha-1,6-mannosylglycoprotein 6-beta-N-acetylglucosaminyltransferase A;Mgat5;ortholog
MOUSE|MGI=MGI=1918935|UniProtKB=Q8BVG5	Galnt14	Polypeptide N-acetylgalactosaminyltransferase 14;Galnt14;ortholog
MOUSE|MGI=MGI=1913581|UniProtKB=E5D8G1	Galntl6	Polypeptide N-acetylgalactosaminyltransferase;Galntl6;ortholog
MOUSE|MGI=MGI=1195264|UniProtKB=Q91WV7	Slc3a1	Neutral and basic amino acid transport protein rBAT;Slc3a1;ortholog
MOUSE|MGI=MGI=1330859|UniProtKB=O88819	Fut9	Alpha-(1,3)-fucosyltransferase 9;Fut9;ortholog
MOUSE|MGI=MGI=1354959|UniProtKB=Q80UW0	Hs6st2	Heparan-sulfate 6-O-sulfotransferase 2;Hs6st2;ortholog
MOUSE|MGI=MGI=2442842|UniProtKB=Q9Z2D0	Mtmr9	Myotubularin-related protein 9;Mtmr9;ortholog
MOUSE|MGI=MGI=97475|UniProtKB=P97467	Pam	Peptidyl-glycine alpha-amidating monooxygenase;Pam;ortholog
MOUSE|MGI=MGI=1924265|UniProtKB=Q9CZJ0	Mpped2	Metallophosphoesterase MPPED2;Mpped2;ortholog
MOUSE|MGI=MGI=1349403|UniProtKB=O54904	B3galt1	Beta-1,3-galactosyltransferase 1;B3galt1;ortholog
MOUSE|MGI=MGI=2138283|UniProtKB=Q6PGK7	Chst10	Carbohydrate sulfotransferase 10;Chst10;ortholog
MOUSE|MGI=MGI=2388283|UniProtKB=Q3UPY5	Glb1l2	Beta-galactosidase-1-like protein 2;Glb1l2;ortholog
MOUSE|MGI=MGI=1339968|UniProtKB=Q8VCN5	Cth	Cystathionine gamma-lyase;Cth;ortholog
MOUSE|MGI=MGI=1922725|UniProtKB=Q8K010	Oplah	5-oxoprolinase;Oplah;ortholog
MOUSE|MGI=MGI=2386681|UniProtKB=Q6P7F1	Mpp4	MAGUK p55 subfamily member 4;Mpp4;ortholog
MOUSE|MGI=MGI=1928380|UniProtKB=Q9WVK5	B4galt6	Beta-1,4-galactosyltransferase 6;B4galt6;ortholog
MOUSE|MGI=MGI=3646700|UniProtKB=Q8CFA2	Amt	Aminomethyltransferase, mitochondrial;Amt;ortholog
MOUSE|MGI=MGI=1321386|UniProtKB=Q8BFW6	Entpd3	Ectonucleoside triphosphate diphosphohydrolase 3;Entpd3;ortholog
MOUSE|MGI=MGI=104720|UniProtKB=P51661	Hsd11b2	Corticosteroid 11-beta-dehydrogenase isozyme 2;Hsd11b2;ortholog
MOUSE|MGI=MGI=1274782|UniProtKB=O70582	Alox12b	Arachidonate 12-lipoxygenase, 12R-type;Alox12b;ortholog
MOUSE|MGI=MGI=109552|UniProtKB=O09046	Il4i1	L-amino-acid oxidase;Il4i1;ortholog
MOUSE|MGI=MGI=106576|UniProtKB=Q6IQX7	Chpf	Chondroitin sulfate synthase 2;Chpf;ortholog
MOUSE|MGI=MGI=1289238|UniProtKB=Q3TLP5	Echdc2	Enoyl-CoA hydratase domain-containing protein 2, mitochondrial;Echdc2;ortholog
MOUSE|MGI=MGI=2664115|UniProtKB=Q9ESL0	Oxct2b	Succinyl-CoA:3-ketoacid coenzyme A transferase 2B, mitochondrial;Oxct2b;ortholog
MOUSE|MGI=MGI=1927166|UniProtKB=Q9JME2	Chst11	Carbohydrate sulfotransferase 11;Chst11;ortholog
MOUSE|MGI=MGI=2384819|UniProtKB=P0C871	Pla2g4b	Cytosolic phospholipase A2 beta;Pla2g4b;ortholog
MOUSE|MGI=MGI=2143539|UniProtKB=Q571F8	Gls2	Glutaminase liver isoform, mitochondrial;Gls2;ortholog
MOUSE|MGI=MGI=2685814|UniProtKB=B2RY83	Hpse2	Inactive heparanase-2;Hpse2;ortholog
MOUSE|MGI=MGI=1922997|UniProtKB=Q9CYP7	Sesn3	Sestrin-3;Sesn3;ortholog
MOUSE|MGI=MGI=1921305|UniProtKB=Q8K4S1	Plce1	1-phosphatidylinositol 4,5-bisphosphate phosphodiesterase epsilon-1;Plce1;ortholog
MOUSE|MGI=MGI=2176159|UniProtKB=Q811W2	Cyp26b1	Cytochrome P450 26B1;Cyp26b1;ortholog
MOUSE|MGI=MGI=1926173|UniProtKB=Q5DTK1	Chsy3	Chondroitin sulfate synthase 3;Chsy3;ortholog
MOUSE|MGI=MGI=106015|UniProtKB=Q61387	Scaf1	Cytochrome c oxidase subunit 7A-related protein, mitochondrial;Cox7a2l;ortholog
MOUSE|MGI=MGI=95653|UniProtKB=Q64467	Gapdhs	Glyceraldehyde-3-phosphate dehydrogenase, testis-specific;Gapdhs;ortholog
MOUSE|MGI=MGI=1196403|UniProtKB=Q64GA5	Pla2g4c	Cytosolic phospholipase A2 gamma;Pla2g4c;ortholog
MOUSE|MGI=MGI=95634|UniProtKB=P48320	Gad2	Glutamate decarboxylase 2;Gad2;ortholog
MOUSE|MGI=MGI=2138563|UniProtKB=Q8K007	Sulf1	Extracellular sulfatase Sulf-1;Sulf1;ortholog
MOUSE|MGI=MGI=1916969|UniProtKB=B2RQC6	Cad	CAD protein;Cad;ortholog
MOUSE|MGI=MGI=1917825|UniProtKB=Q9CYH5	Gfod2	Glucose-fructose oxidoreductase domain-containing protein 2;Gfod2;ortholog
MOUSE|MGI=MGI=2388640|UniProtKB=Q7TPB0	Plppr3	Phospholipid phosphatase-related protein type 3;Plppr3;ortholog
MOUSE|MGI=MGI=2448520|UniProtKB=Q6U7H8	Pip5kl1	Phosphatidylinositol 4-phosphate 5-kinase-like protein 1;Pip5kl1;ortholog
MOUSE|MGI=MGI=1919030|UniProtKB=Q9JHU9	Isyna1	Inositol-3-phosphate synthase 1;Isyna1;ortholog
MOUSE|MGI=MGI=1923904|UniProtKB=Q8CGR7	Upp2	Uridine phosphorylase 2;Upp2;ortholog
MOUSE|MGI=MGI=1934234|UniProtKB=Q80XI4	Pip4k2b	Phosphatidylinositol 5-phosphate 4-kinase type-2 beta;Pip4k2b;ortholog
MOUSE|MGI=MGI=97615|UniProtKB=Q62077	Plcg1	1-phosphatidylinositol 4,5-bisphosphate phosphodiesterase gamma-1;Plcg1;ortholog
MOUSE|MGI=MGI=1096359|UniProtKB=O55127	Cyp26a1	Cytochrome P450 26A1;Cyp26a1;ortholog
MOUSE|MGI=MGI=1349764|UniProtKB=O35098	Dpysl4	Dihydropyrimidinase-related protein 4;Dpysl4;ortholog
MOUSE|MGI=MGI=2444646|UniProtKB=Q8K248	Hpdl	4-hydroxyphenylpyruvate dioxygenase-like protein;Hpdl;ortholog
MOUSE|MGI=MGI=1328354|UniProtKB=O88910	Mpp3	MAGUK p55 subfamily member 3;Mpp3;ortholog
MOUSE|MGI=MGI=2152819|UniProtKB=Q91Z92	B3galt6	Beta-1,3-galactosyltransferase 6;B3galt6;ortholog
MOUSE|MGI=MGI=2685279|UniProtKB=Q3V1N9	A3galt2	Alpha-1,3-galactosyltransferase 2;A3galt2;ortholog
MOUSE|MGI=MGI=1919144|UniProtKB=Q50L42	Pla2g4e	Cytosolic phospholipase A2 epsilon;Pla2g4e;ortholog
MOUSE|MGI=MGI=2653900|UniProtKB=Q8BH00	Aldh8a1	2-aminomuconic semialdehyde dehydrogenase;Aldh8a1;ortholog
MOUSE|MGI=MGI=2683547|UniProtKB=Q4KWH5	Plch1	1-phosphatidylinositol 4,5-bisphosphate phosphodiesterase eta-1;Plch1;ortholog
MOUSE|MGI=MGI=1351352|UniProtKB=Q9CWJ9	Atic	Bifunctional purine biosynthesis protein PURH;Atic;ortholog
MOUSE|MGI=MGI=95632|UniProtKB=P48318	Gad1	Glutamate decarboxylase 1;Gad1;ortholog
MOUSE|MGI=MGI=105119|UniProtKB=Q5SDA5	Gucy2f	Retinal guanylyl cyclase 2;Gucy2f;ortholog
MOUSE|MGI=MGI=1921371|UniProtKB=Q9DBS4	Acoxl	Acyl-coenzyme A oxidase-like protein;Acoxl;ortholog
MOUSE|MGI=MGI=2136405|UniProtKB=Q9EPS3	Glce	D-glucuronyl C5-epimerase;Glce;ortholog
MOUSE|MGI=MGI=95394|UniProtKB=P17183	Eno2	Gamma-enolase;Eno2;ortholog
MOUSE|MGI=MGI=96567|UniProtKB=P50096	Impdh1	Inosine-5'-monophosphate dehydrogenase 1;Impdh1;ortholog
MOUSE|MGI=MGI=1345167|UniProtKB=Q9WVM8	Aadat	Kynurenine/alpha-aminoadipate aminotransferase, mitochondrial;Aadat;ortholog
MOUSE|MGI=MGI=88588|UniProtKB=P00184	Cyp1a1	Cytochrome P450 1A1;Cyp1a1;ortholog
MOUSE|MGI=MGI=2139422|UniProtKB=A2AQ92	Duox1	Dual oxidase 1;Duox1;ortholog
MOUSE|MGI=MGI=2685726|UniProtKB=Q3UHE1	Pitpnm3	Membrane-associated phosphatidylinositol transfer protein 3;Pitpnm3;ortholog
MOUSE|MGI=MGI=1925623|UniProtKB=Q9CWD3	Nudt17	Nucleoside diphosphate-linked moiety X motif 17;Nudt17;ortholog
MOUSE|MGI=MGI=3584519|UniProtKB=Q3UX83	Accsl	Probable inactive 1-aminocyclopropane-1-carboxylate synthase-like protein 2;Accsl;ortholog
MOUSE|MGI=MGI=1354960|UniProtKB=Q9QYK4	Hs6st3	Heparan-sulfate 6-O-sulfotransferase 3;Hs6st3;ortholog
MOUSE|MGI=MGI=1202298|UniProtKB=O70311	Nmt2	Glycylpeptide N-tetradecanoyltransferase 2;Nmt2;ortholog
MOUSE|MGI=MGI=88392|UniProtKB=Q03059	Chat	Choline O-acetyltransferase;Chat;ortholog
MOUSE|MGI=MGI=95402|UniProtKB=P49222	Epb42	Erythrocyte membrane protein band 4.2;Epb42;ortholog
MOUSE|MGI=MGI=3644563|UniProtKB=D3YTS9	Acp4	Testicular acid phosphatase;Acp4;ortholog
MOUSE|MGI=MGI=1349762|UniProtKB=Q62188	Dpysl3	Dihydropyrimidinase-related protein 3;Dpysl3;ortholog
MOUSE|MGI=MGI=97724|UniProtKB=P40935	Pnmt	Phenylethanolamine N-methyltransferase;Pnmt;ortholog
MOUSE|MGI=MGI=107928|UniProtKB=Q62148	Aldh1a2,Aldh1a7	Retinal dehydrogenase 2;Aldh1a2;ortholog
MOUSE|MGI=MGI=106638|UniProtKB=P48076	Pla2g2c	Group IIC secretory phospholipase A2;Pla2g2c;ortholog
MOUSE|MGI=MGI=891996|UniProtKB=Q8C196	Cps1	Carbamoyl-phosphate synthase [ammonia], mitochondrial;Cps1;ortholog
MOUSE|MGI=MGI=97614|UniProtKB=Q8R3B1	Plcd1	1-phosphatidylinositol 4,5-bisphosphate phosphodiesterase delta-1;Plcd1;ortholog
MOUSE|MGI=MGI=1917516|UniProtKB=Q8BTY1	Kyat1	Kynurenine--oxoglutarate transaminase 1;Kyat1;ortholog
MOUSE|MGI=MGI=1889276|UniProtKB=Q9R1C6	Dgke	Diacylglycerol kinase epsilon;Dgke;ortholog
MOUSE|MGI=MGI=1930957|UniProtKB=P0C028	Nudt11	Diphosphoinositol polyphosphate phosphohydrolase 3-beta;Nudt11;ortholog
MOUSE|MGI=MGI=1098274|UniProtKB=O35084	Cyp27b1	25-hydroxyvitamin D-1 alpha hydroxylase, mitochondrial;Cyp27b1;ortholog
MOUSE|MGI=MGI=3646885|UniProtKB=Q402B2	Wdr93	WD repeat-containing protein 93;Wdr93;ortholog
MOUSE|MGI=MGI=109598|UniProtKB=O35469	Hsd3b6	3 beta-hydroxysteroid dehydrogenase/Delta 5--4-isomerase type 6;Hsd3b6;ortholog
MOUSE|MGI=MGI=2137302|UniProtKB=Q8BGY6	B3gnt5	Lactosylceramide 1,3-N-acetyl-beta-D-glucosaminyltransferase;B3gnt5;ortholog
MOUSE|MGI=MGI=1932466|UniProtKB=Q99N32	Klb	Beta-klotho;Klb;ortholog
MOUSE|MGI=MGI=2146830|UniProtKB=Q8BVP2	Ldhal6b	L-lactate dehydrogenase;Ldhal6b;ortholog
MOUSE|MGI=MGI=107815|UniProtKB=P70265	Pfkfb2	6-phosphofructo-2-kinase/fructose-2,6-bisphosphatase 2;Pfkfb2;ortholog
MOUSE|MGI=MGI=1916197|UniProtKB=Q8BQ86	Chst8	Carbohydrate sulfotransferase 8;Chst8;ortholog
MOUSE|MGI=MGI=1196256|UniProtKB=Q6ZQ88	Kdm1a	Lysine-specific histone demethylase 1A;Kdm1a;ortholog
MOUSE|MGI=MGI=2180699|UniProtKB=Q91XS1	Mtmr4	Myotubularin-related protein 4;Mtmr4;ortholog
MOUSE|MGI=MGI=1098297|UniProtKB=Q924X2	Cpt1b	Carnitine O-palmitoyltransferase 1, muscle isoform;Cpt1b;ortholog
MOUSE|MGI=MGI=2446239|UniProtKB=Q8K1B9	Galnt18	Polypeptide N-acetylgalactosaminyltransferase 18;Galnt18;ortholog
MOUSE|MGI=MGI=87926|UniProtKB=Q64437	Adh7	Alcohol dehydrogenase class 4 mu/sigma chain;Adh7;ortholog
MOUSE|MGI=MGI=97360|UniProtKB=Q9Z0J4	Nos1	Nitric oxide synthase, brain;Nos1;ortholog
MOUSE|MGI=MGI=106590|UniProtKB=Q61647	Has1	Hyaluronan synthase 1;Has1;ortholog
MOUSE|MGI=MGI=97372|UniProtKB=Q6VVW5	Npr2	Atrial natriuretic peptide receptor 2;Npr2;ortholog
MOUSE|MGI=MGI=1923750|UniProtKB=Q80V72	Ip6k2	Inositol hexakisphosphate kinase 2;Ip6k2;ortholog
MOUSE|MGI=MGI=1354958|UniProtKB=Q9QYK5	Hs6st1	Heparan-sulfate 6-O-sulfotransferase 1;Hs6st1;ortholog
MOUSE|MGI=MGI=2444155|UniProtKB=Q8BNJ3	Nmnat2	Nicotinamide/nicotinic acid mononucleotide adenylyltransferase 2;Nmnat2;ortholog
MOUSE|MGI=MGI=107816|UniProtKB=P70266	Pfkfb1	6-phosphofructo-2-kinase/fructose-2,6-bisphosphatase 1;Pfkfb1;ortholog
MOUSE|MGI=MGI=2654575|UniProtKB=Q925G2	Cybrd1	Cytochrome b reductase 1;Cybrd1;ortholog
MOUSE|MGI=MGI=1341796|UniProtKB=Q9WVF6	Pla2g2d	Group IID secretory phospholipase A2;Pla2g2d;ortholog
MOUSE|MGI=MGI=2389490|UniProtKB=P59270	B3gat2	Galactosylgalactosylxylosylprotein 3-beta-glucuronosyltransferase 2;B3gat2;ortholog
MOUSE|MGI=MGI=2652891|UniProtKB=Q766D5	B4galnt4	N-acetyl-beta-glucosaminyl-glycoprotein 4-beta-N-acetylgalactosaminyltransferase 1;B4galnt4;ortholog
MOUSE|MGI=MGI=3041155|UniProtKB=Q6L8S8	B4galnt3	Beta-1,4-N-acetylgalactosaminyltransferase 3;B4galnt3;ortholog
MOUSE|MGI=MGI=1932403|UniProtKB=Q6A152	Cyp4x1	Cytochrome P450 4X1;Cyp4x1;ortholog
MOUSE|MGI=MGI=3034689|UniProtKB=Q80WS3	Fbll1	rRNA/tRNA 2'-O-methyltransferase fibrillarin-like protein 1;Fbll1;ortholog
MOUSE|MGI=MGI=1917271|UniProtKB=A0A2I3BR81	Nt5dc2	5'-nucleotidase domain-containing 2;Nt5dc2;ortholog
MOUSE|MGI=MGI=2441982|UniProtKB=Q8BWF0	Aldh5a1	Succinate-semialdehyde dehydrogenase, mitochondrial;Aldh5a1;ortholog
Transmembrane signal receptor (PC00197)
MOUSE|MGI=MGI=1920260|UniProtKB=Q8BZL4	Gpr22	G-protein coupled receptor 22;Gpr22;ortholog
MOUSE|MGI=MGI=97796|UniProtKB=P43117	Ptgfr	Prostaglandin F2-alpha receptor;Ptgfr;ortholog
MOUSE|MGI=MGI=1351342|UniProtKB=Q3UVX5	Grm5	Metabotropic glutamate receptor 5;Grm5;ortholog
MOUSE|MGI=MGI=2139714|UniProtKB=Q8JZZ7	Adgrl2	Adhesion G protein-coupled receptor L2;Adgrl2;ortholog
MOUSE|MGI=MGI=3643278|UniProtKB=P0C5J4	Gpr52	G-protein coupled receptor 52;Gpr52;ortholog
MOUSE|MGI=MGI=108082|UniProtKB=O70342	Npy5r	Neuropeptide Y receptor type 5;Npy5r;ortholog
MOUSE|MGI=MGI=1337018|UniProtKB=O88854	Galr2	Galanin receptor type 2;Galr2;ortholog
MOUSE|MGI=MGI=96273|UniProtKB=Q64264	Htr1a	5-hydroxytryptamine receptor 1A;Htr1a;ortholog
MOUSE|MGI=MGI=1859216|UniProtKB=Q62463	Avpr1a	Vasopressin V1a receptor;Avpr1a;ortholog
MOUSE|MGI=MGI=108476|UniProtKB=Q61086	Fzd3	Frizzled-3;Fzd3;ortholog
MOUSE|MGI=MGI=1196625|UniProtKB=O70421	Fzd1	Frizzled-1;Fzd1;ortholog
MOUSE|MGI=MGI=97795|UniProtKB=P30557	Ptger3	Prostaglandin E2 receptor EP3 subtype;Ptger3;ortholog
MOUSE|MGI=MGI=1338022|UniProtKB=Q9WUK7	Opn3	Opsin-3;Opn3;ortholog
MOUSE|MGI=MGI=1330275|UniProtKB=Q9Z2J6	Ptgdr2	Prostaglandin D2 receptor 2;Ptgdr2;ortholog
MOUSE|MGI=MGI=1860292|UniProtKB=Q9WUP1	Ramp3	Receptor activity-modifying protein 3;Ramp3;ortholog
MOUSE|MGI=MGI=1920266|UniProtKB=Q8K1S7	Kremen2	Kremen protein 2;Kremen2;ortholog
MOUSE|MGI=MGI=1095407|UniProtKB=O35607	Bmpr2	Bone morphogenetic protein receptor type-2;Bmpr2;ortholog
MOUSE|MGI=MGI=1927653|UniProtKB=Q9EPB7	Gpr88	Probable G-protein coupled receptor 88;Gpr88;ortholog
MOUSE|MGI=MGI=2685211|UniProtKB=Q80T62	Gpr101	Probable G-protein coupled receptor 101;Gpr101;ortholog
MOUSE|MGI=MGI=1915522|UniProtKB=Q9D1T0	Lingo1	Leucine-rich repeat and immunoglobulin-like domain-containing nogo receptor-interacting protein 1;Lingo1;ortholog
MOUSE|MGI=MGI=894682|UniProtKB=Q8K1S4	Unc5a	Netrin receptor UNC5A;Unc5a;ortholog
MOUSE|MGI=MGI=2385324|UniProtKB=Q8K087	Gpr1	G-protein coupled receptor 1;Gpr1;ortholog
MOUSE|MGI=MGI=106673|UniProtKB=P97714	Adra1a,Adra1d	Alpha-1D adrenergic receptor;Adra1d;ortholog
MOUSE|MGI=MGI=1351345|UniProtKB=P47743	Grm8	Metabotropic glutamate receptor 8;Grm8;ortholog
MOUSE|MGI=MGI=2136761|UniProtKB=Q8BKG4	Fzd10	Frizzled-10;Fzd10;ortholog
MOUSE|MGI=MGI=109147|UniProtKB=P97926	Oxtr	Oxytocin receptor;Oxtr;ortholog
MOUSE|MGI=MGI=1349163|UniProtKB=Q64519	Sdc3	Syndecan-3;Sdc3;ortholog
MOUSE|MGI=MGI=98328|UniProtKB=P30875	Sstr2	Somatostatin receptor type 2;Sstr2;ortholog
MOUSE|MGI=MGI=97438|UniProtKB=P32300	Oprd1	Delta-type opioid receptor;Oprd1;ortholog
MOUSE|MGI=MGI=2181363|UniProtKB=Q8K458	Prokr2	Prokineticin receptor 2;Prokr2;ortholog
MOUSE|MGI=MGI=2444651|UniProtKB=Q149C3	Lingo4	Leucine-rich repeat and immunoglobulin-like domain containing-NOGO receptor-interacting protein 4;Lingo4;ortholog
MOUSE|MGI=MGI=2441763|UniProtKB=Q8BFQ3	Gpr68	Ovarian cancer G-protein coupled receptor 1;Gpr68;ortholog
MOUSE|MGI=MGI=101909|UniProtKB=P35412	Gpr12	G-protein coupled receptor 12;Gpr12;ortholog
MOUSE|MGI=MGI=1096364|UniProtKB=P56479	Galr1	Galanin receptor type 1;Galr1;ortholog
MOUSE|MGI=MGI=1313278|UniProtKB=Q9R216	Fzd3	Frizzled-9;Fzd9;ortholog
MOUSE|MGI=MGI=1860130|UniProtKB=Q924H0	Npffr2	Neuropeptide FF receptor 2;Npffr2;ortholog
MOUSE|MGI=MGI=87966|UniProtKB=P35374	Agtr2	Type-2 angiotensin II receptor;Agtr2;ortholog
MOUSE|MGI=MGI=2441719|UniProtKB=Q8C010	Gpr61	G-protein coupled receptor 61;Gpr61;ortholog
MOUSE|MGI=MGI=2653880|UniProtKB=Q6PCP7	Gpr156	Probable G-protein coupled receptor 156;Gpr156;ortholog
MOUSE|MGI=MGI=99478|UniProtKB=O08786	Cckar	Cholecystokinin receptor type A;Cckar;ortholog
MOUSE|MGI=MGI=2442479|UniProtKB=Q8C8T7	Elfn1	Protein ELFN1;Elfn1;ortholog
MOUSE|MGI=MGI=1098590|UniProtKB=Q61212	Npy5r	Neuropeptide Y receptor type 6;Npy6r;ortholog
MOUSE|MGI=MGI=87911|UniProtKB=P37172	Acvr1	Activin receptor type-1;Acvr1;ortholog
MOUSE|MGI=MGI=2669796|UniProtKB=Q7M6Z0	Rtn4rl2	Reticulon-4 receptor-like 2;Rtn4rl2;ortholog
MOUSE|MGI=MGI=107191|UniProtKB=P36898	Bmpr1b	Bone morphogenetic protein receptor type-1B;Bmpr1b;ortholog
MOUSE|MGI=MGI=2685054|UniProtKB=B2RPY5	Gpr161	G-protein coupled receptor 161;Gpr161;ortholog
MOUSE|MGI=MGI=105062|UniProtKB=Q8K592	Amhr2	Anti-Muellerian hormone type-2 receptor;Amhr2;ortholog
MOUSE|MGI=MGI=2385650|UniProtKB=P58307	Hcrtr1	Orexin receptor type 1;Hcrtr1;ortholog
MOUSE|MGI=MGI=2441950|UniProtKB=Q80TS3	Adgrl3	Adhesion G protein-coupled receptor L3;Adgrl3;ortholog
MOUSE|MGI=MGI=109545|UniProtKB=P43142	Gpr182	G-protein coupled receptor 182;Gpr182;ortholog
MOUSE|MGI=MGI=1933547|UniProtKB=Q925D8	Tas1r3	Taste receptor type 1 member 3;Tas1r3;ortholog
MOUSE|MGI=MGI=1333744|UniProtKB=O35930	Gp1ba	Platelet glycoprotein Ib alpha chain;Gp1ba;ortholog
MOUSE|MGI=MGI=108418|UniProtKB=P97295	Npy2r	Neuropeptide Y receptor type 2;Npy2r;ortholog
MOUSE|MGI=MGI=2443855|UniProtKB=Q8CBR6	Tsku	Tsukushin;Tsku;ortholog
MOUSE|MGI=MGI=2441827|UniProtKB=Q8BGE9	Rxfp3	Relaxin-3 receptor 1;Rxfp3;ortholog
MOUSE|MGI=MGI=2135884|UniProtKB=Q9EQQ3	Gpr63	Probable G-protein coupled receptor 63;Gpr63;ortholog
MOUSE|MGI=MGI=97386|UniProtKB=O88319	Ntsr1	Neurotensin receptor type 1;Ntsr1;ortholog
MOUSE|MGI=MGI=95408|UniProtKB=P14753	Epor	Erythropoietin receptor;Epor;ortholog
MOUSE|MGI=MGI=1888513|UniProtKB=Q9JIP6	Fzd2,Fzd10	Frizzled-2;Fzd2;ortholog
MOUSE|MGI=MGI=1351344|UniProtKB=Q68ED2	Grm7	Metabotropic glutamate receptor 7;Grm7;ortholog
MOUSE|MGI=MGI=2441765|UniProtKB=Q8BZ39	Nmur2	Neuromedin-U receptor 2;Nmur2;ortholog
MOUSE|MGI=MGI=2441843|UniProtKB=Q6X632	Gpr75	Probable G-protein coupled receptor 75;Gpr75;ortholog
MOUSE|MGI=MGI=2441837|UniProtKB=Q80ZF8	Adgrb3	Adhesion G protein-coupled receptor B3;Adgrb3;ortholog
MOUSE|MGI=MGI=1860139|UniProtKB=Q9WV18	Gabbr1	Gamma-aminobutyric acid type B receptor subunit 1;Gabbr1;ortholog
MOUSE|MGI=MGI=99456|UniProtKB=Q01727	Mc1r	Melanocyte-stimulating hormone receptor;Mc1r;ortholog
MOUSE|MGI=MGI=3605040|UniProtKB=Q8BHA1	Lrrc24	Leucine-rich repeat-containing protein 24;Lrrc24;ortholog
MOUSE|MGI=MGI=109521|UniProtKB=P35363	Htr2a	5-hydroxytryptamine receptor 2A;Htr2a;ortholog
MOUSE|MGI=MGI=2448607|UniProtKB=P83503	Nyx	Nyctalopin;Nyx;ortholog
MOUSE|MGI=MGI=1918021|UniProtKB=Q6PI62	Gpr173	Probable G-protein coupled receptor 173;Gpr173;ortholog
MOUSE|MGI=MGI=94926|UniProtKB=P51436	Drd4	D(4) dopamine receptor;Drd4;ortholog
MOUSE|MGI=MGI=3645892|UniProtKB=O70410	Vmn2r1	Vomeronasal type-2 receptor 1;Vmn2r1;ortholog
MOUSE|MGI=MGI=891989|UniProtKB=P49681	Npbwr1	Neuropeptides B/W receptor type 1;Npbwr1;ortholog
MOUSE|MGI=MGI=102845|UniProtKB=P32299	Bdkrb2	B2 bradykinin receptor;Bdkrb2;ortholog
MOUSE|MGI=MGI=2389364|UniProtKB=Q8K1S2	Unc5d	Netrin receptor UNC5D;Unc5d;ortholog
MOUSE|MGI=MGI=2685213|UniProtKB=B7ZCC9	Adgrg4	Adhesion G-protein coupled receptor G4;Adgrg4;ortholog
MOUSE|MGI=MGI=104963|UniProtKB=Q04573	Npy1r	Neuropeptide Y receptor type 1;Npy1r;ortholog
MOUSE|MGI=MGI=2139279|UniProtKB=P58406	Hrh3	Histamine H3 receptor;Hrh3;ortholog
MOUSE|MGI=MGI=109246|UniProtKB=P97288	Htr4	5-hydroxytryptamine receptor 4;Htr4;ortholog
MOUSE|MGI=MGI=2446854|UniProtKB=Q8CJ12	Adgrg2	Adhesion G-protein coupled receptor G2;Adgrg2;ortholog
MOUSE|MGI=MGI=2441906|UniProtKB=Q99P50	Ghsr	Growth hormone secretagogue receptor type 1;Ghsr;ortholog
MOUSE|MGI=MGI=2177651|UniProtKB=Q9CZT5	Vasn	Vasorin;Vasn;ortholog
MOUSE|MGI=MGI=99457|UniProtKB=P56450	Mc4r	Melanocortin receptor 4;Mc4r;ortholog
MOUSE|MGI=MGI=1351341|UniProtKB=Q68EF4	Grm4	Metabotropic glutamate receptor 4;Grm4;ortholog
MOUSE|MGI=MGI=1860298|UniProtKB=Q9WU66	Sfrp5	Secreted frizzled-related protein 5;Sfrp5;ortholog
MOUSE|MGI=MGI=88397|UniProtKB=Q9ERZ4	Chrm2	Muscarinic acetylcholine receptor M2;Chrm2;ortholog
MOUSE|MGI=MGI=1916151|UniProtKB=Q6F3F9	Adgrg6	Adhesion G-protein coupled receptor G6;Adgrg6;ortholog
MOUSE|MGI=MGI=1349162|UniProtKB=P18828	Sdc1	Syndecan-1;Sdc1;ortholog
MOUSE|MGI=MGI=107619|UniProtKB=P70174	Hrh1	Histamine H1 receptor;Hrh1;ortholog
MOUSE|MGI=MGI=102806|UniProtKB=P27038	Acvr2a	Activin receptor type-2A;Acvr2a;ortholog
MOUSE|MGI=MGI=96283|UniProtKB=P30966	Htr5a	5-hydroxytryptamine receptor 5A;Htr5a;ortholog
MOUSE|MGI=MGI=104773|UniProtKB=P97718	Adra1a	Alpha-1A adrenergic receptor;Adra1a;ortholog
MOUSE|MGI=MGI=1918711|UniProtKB=Q8BKG3	Ptk7	Inactive tyrosine-protein kinase 7;Ptk7;ortholog
MOUSE|MGI=MGI=1196627|UniProtKB=Q9R1C8	Htr6	5-hydroxytryptamine receptor 6;Htr6;ortholog
MOUSE|MGI=MGI=1929461|UniProtKB=Q80TR1	Adgrl1	Adhesion G protein-coupled receptor L1;Adgrl1;ortholog
MOUSE|MGI=MGI=2135956|UniProtKB=Q6VMN6	Prlhr	Prolactin-releasing peptide receptor;Prlhr;ortholog
MOUSE|MGI=MGI=1340051|UniProtKB=Q8K209	Adgrg1	Adhesion G-protein coupled receptor G1;Adgrg1;ortholog
MOUSE|MGI=MGI=2183450|UniProtKB=Q8VIH9	Uts2r	Urotensin-2 receptor;Uts2r;ortholog
MOUSE|MGI=MGI=1914718|UniProtKB=Q9CQY7	Mmd	Monocyte to macrophage differentiation factor;Mmd;ortholog
MOUSE|MGI=MGI=1913106|UniProtKB=Q9ERS6	Il1rapl2	X-linked interleukin-1 receptor accessory protein-like 2;Il1rapl2;ortholog
MOUSE|MGI=MGI=96783|UniProtKB=P30730	Lhcgr	Lutropin-choriogonadotropic hormone receptor;Lhcgr;ortholog
MOUSE|MGI=MGI=1927505|UniProtKB=Q99PG6	Tas1r1	Taste receptor type 1 member 1;Tas1r1;ortholog
MOUSE|MGI=MGI=94924|UniProtKB=P61168	Drd2	D(2) dopamine receptor;Drd2;ortholog
MOUSE|MGI=MGI=104615|UniProtKB=P47746	Cnr1	Cannabinoid receptor 1;Cnr1;ortholog
MOUSE|MGI=MGI=98329|UniProtKB=P30935	Sstr3	Somatostatin receptor type 3;Sstr3;ortholog
MOUSE|MGI=MGI=88399|UniProtKB=P32211	Chrm4	Muscarinic acetylcholine receptor M4;Chrm4;ortholog
MOUSE|MGI=MGI=1888501|UniProtKB=Q9JJL9	Ltb4r2	Leukotriene B4 receptor 2;Ltb4r2;ortholog
MOUSE|MGI=MGI=2155249|UniProtKB=Q6YNI2	Gpr6	G-protein coupled receptor 6;Gpr6;ortholog
MOUSE|MGI=MGI=1921738|UniProtKB=Q80X72	Lrrc15	Leucine-rich repeat-containing protein 15;Lrrc15;ortholog
MOUSE|MGI=MGI=99578|UniProtKB=Q61616	Drd1	D(1A) dopamine receptor;Drd1;ortholog
MOUSE|MGI=MGI=892010|UniProtKB=Q9Z1N6	Sfrp4	Secreted frizzled-related sequence protein 4;Sfrp4;ortholog
MOUSE|MGI=MGI=2441805|UniProtKB=Q3UVD5	Lgr6	Leucine-rich repeat-containing G-protein coupled receptor 6;Lgr6;ortholog
MOUSE|MGI=MGI=1351339|UniProtKB=Q14BI2	Grm2	Metabotropic glutamate receptor 2;Grm2;ortholog
MOUSE|MGI=MGI=2441758|UniProtKB=Q8BZA7	Gpr26	G-protein coupled receptor 26;Gpr26;ortholog
MOUSE|MGI=MGI=2679683|UniProtKB=Q6TCG8	Paqr3	Progestin and adipoQ receptor family member 3;Paqr3;ortholog
MOUSE|MGI=MGI=2441697|UniProtKB=Q8C419	Gpr158	Probable G-protein coupled receptor 158;Gpr158;ortholog
MOUSE|MGI=MGI=1858422|UniProtKB=Q9JL06	Lpar2	Lysophosphatidic acid receptor 2;Lpar2;ortholog
MOUSE|MGI=MGI=2661081|UniProtKB=Q8K348	Acvr1c	Activin receptor type-1C;Acvr1c;ortholog
MOUSE|MGI=MGI=892014|UniProtKB=Q8C4U3	Sfrp1	Secreted frizzled-related protein 1;Sfrp1;ortholog
Nucleic acid binding protein (PC00171)
MOUSE|MGI=MGI=1926224|UniProtKB=Q9JJ43	Rbfox1	RNA binding protein fox-1 homolog 1;Rbfox1;ortholog
MOUSE|MGI=MGI=106368|UniProtKB=Q8BIF2	Rbfox3	RNA binding protein fox-1 homolog 3;Rbfox3;ortholog
MOUSE|MGI=MGI=104626|UniProtKB=Q91WM1	Strbp	Spermatid perinuclear RNA-binding protein;Strbp;ortholog
MOUSE|MGI=MGI=3584032|UniProtKB=Q45KJ6	Lin28b	Protein lin-28 homolog B;Lin28b;ortholog
MOUSE|MGI=MGI=104297|UniProtKB=Q9JKN6	Nova1	RNA-binding protein Nova-1;Nova1;ortholog
MOUSE|MGI=MGI=2385292|UniProtKB=Q3UHK8	Tnrc6a	Trinucleotide repeat-containing gene 6A protein;Tnrc6a;ortholog
MOUSE|MGI=MGI=1891690|UniProtKB=Q7TMK9	Syncrip	Heterogeneous nuclear ribonucleoprotein Q;Syncrip;ortholog
MOUSE|MGI=MGI=1919890|UniProtKB=G3UYU0	Mex3a	Mex3 RNA-binding family member A;Mex3a;ortholog
MOUSE|MGI=MGI=2685518|UniProtKB=Q6PEE2	Ctif	CBP80/20-dependent translation initiation factor;Ctif;ortholog
MOUSE|MGI=MGI=1923304|UniProtKB=Q7TPM1	Prrc2b	Protein PRRC2B;Prrc2b;ortholog
MOUSE|MGI=MGI=2151118|UniProtKB=Q9JI20	Adarb2	Double-stranded RNA-specific editase B2;Adarb2;ortholog
MOUSE|MGI=MGI=1918252|UniProtKB=Q69Z36	Mex3b	RNA-binding protein MEX3B;Mex3b;ortholog
MOUSE|MGI=MGI=1891925|UniProtKB=O35737	Hnrnph1	Heterogeneous nuclear ribonucleoprotein H;Hnrnph1;ortholog
MOUSE|MGI=MGI=2144117|UniProtKB=P61406	Smg6	Telomerase-binding protein EST1A;Smg6;ortholog
MOUSE|MGI=MGI=2143151|UniProtKB=Q91WE3	Rpp25	Ribonuclease P protein subunit p25;Rpp25;ortholog
MOUSE|MGI=MGI=1890358|UniProtKB=Q5SF07	Igf2bp2	Insulin-like growth factor 2 mRNA-binding protein 2;Igf2bp2;ortholog
MOUSE|MGI=MGI=1913754|UniProtKB=Q3TLH4	Prrc2c	Protein PRRC2C;Prrc2c;ortholog
MOUSE|MGI=MGI=1914715|UniProtKB=Q8K4Z5	Sf3a1	Splicing factor 3A subunit 1;Sf3a1;ortholog
MOUSE|MGI=MGI=2146027|UniProtKB=Q91YQ3	Csdc2	Cold shock domain-containing protein C2;Csdc2;ortholog
MOUSE|MGI=MGI=2179381|UniProtKB=Q99PV0	Prpf8	Pre-mRNA-processing-splicing factor 8;Prpf8;ortholog
MOUSE|MGI=MGI=1931751|UniProtKB=Q80U58	Pum2	Pumilio homolog 2;Pum2;ortholog
MOUSE|MGI=MGI=2445102|UniProtKB=Q80VY9	Dhx33	ATP-dependent RNA helicase DHX33;Dhx33;ortholog
MOUSE|MGI=MGI=4936930|UniProtKB=E9Q368	Tarbp1	TAR RNA-binding protein 1;Tarbp1;ortholog
MOUSE|MGI=MGI=107726|UniProtKB=Q62383	Supt6	Transcription elongation factor SPT6;Supt6h;ortholog
MOUSE|MGI=MGI=2447364|UniProtKB=Q6ZPY2	Smg5	Protein SMG5;Smg5;ortholog
MOUSE|MGI=MGI=104842|UniProtKB=Q5SU73	Coil	Coilin;Coil;ortholog
MOUSE|MGI=MGI=2147067|UniProtKB=Q6P5D3	Dhx57	Putative ATP-dependent RNA helicase DHX57;Dhx57;ortholog
MOUSE|MGI=MGI=3040677|UniProtKB=Q8CGC4	Lsm14b	Protein LSM14 homolog B;Lsm14b;ortholog
MOUSE|MGI=MGI=1932115|UniProtKB=Q9WVP6	Papolb	Poly(A) polymerase beta;Papolb;ortholog
MOUSE|MGI=MGI=1917821|UniProtKB=Q3B807	Tcerg1l	Transcription elongation regulator 1-like protein;Tcerg1l;ortholog
MOUSE|MGI=MGI=1890545|UniProtKB=A2RT18	Tex16	Testis-expressed gene 16;Tex16;ortholog
MOUSE|MGI=MGI=1349436|UniProtKB=Q9Z2E3	Ern2	Serine/threonine-protein kinase/endoribonuclease IRE2;Ern2;ortholog
MOUSE|MGI=MGI=99918|UniProtKB=Q9Z2D6	Mecp2	Methyl-CpG-binding protein 2;Mecp2;ortholog
MOUSE|MGI=MGI=2676627|UniProtKB=P60322	Nanos2	Nanos homolog 2;Nanos2;ortholog
MOUSE|MGI=MGI=109352|UniProtKB=P97931	Ung	Uracil-DNA glycosylase;Ung;ortholog
MOUSE|MGI=MGI=1921719|UniProtKB=Q9D3R9	Taf7l	Transcription initiation factor TFIID subunit 7-like;Taf7l;ortholog
MOUSE|MGI=MGI=1270859|UniProtKB=Q9R194	Cry2	Cryptochrome-2;Cry2;ortholog
MOUSE|MGI=MGI=1337131|UniProtKB=Q61493	Rev3l	DNA polymerase zeta catalytic subunit;Rev3l;ortholog
MOUSE|MGI=MGI=105128|UniProtKB=P54728	Rad23b	UV excision repair protein RAD23 homolog B;Rad23b;ortholog
MOUSE|MGI=MGI=1928268|UniProtKB=Q811J3	Ireb2	Iron-responsive element-binding protein 2;Ireb2;ortholog
MOUSE|MGI=MGI=1890165|UniProtKB=Q6ZQ58	Larp1	La-related protein 1;Larp1;ortholog
MOUSE|MGI=MGI=1915465|UniProtKB=Q80VD1	Fam98b	Protein FAM98B;Fam98b;ortholog
MOUSE|MGI=MGI=2681847|UniProtKB=Q3UE17	Mex3d	RNA-binding protein MEX3D;Mex3d;ortholog
MOUSE|MGI=MGI=2152346|UniProtKB=E9QAP7	Taf4	TATA-box-binding protein-associated factor 4;Taf4;ortholog
MOUSE|MGI=MGI=1918976|UniProtKB=Q6P5C5	Smug1	Single-strand selective monofunctional uracil DNA glycosylase;Smug1;ortholog
MOUSE|MGI=MGI=1917372|UniProtKB=A2AM29	Mllt3	Protein AF-9;Mllt3;ortholog
MOUSE|MGI=MGI=1919412|UniProtKB=Q8VHK9	Dhx36	ATP-dependent DNA/RNA helicase DHX36;Dhx36;ortholog
MOUSE|MGI=MGI=97073|UniProtKB=Q04841	Mid1	DNA-3-methyladenine glycosylase;Mpg;ortholog
MOUSE|MGI=MGI=1916338|UniProtKB=Q9D2C9	Snapc3	snRNA-activating protein complex subunit 3;Snapc3;ortholog
MOUSE|MGI=MGI=1339973|UniProtKB=Q9Z1X4	Ilf3	Interleukin enhancer-binding factor 3;Ilf3;ortholog
MOUSE|MGI=MGI=2151114|UniProtKB=Q9EQM6	Dgcr8	Microprocessor complex subunit DGCR8;Dgcr8;ortholog
MOUSE|MGI=MGI=2140151|UniProtKB=Q8R5K4	Nol6	Nucleolar protein 6;Nol6;ortholog
MOUSE|MGI=MGI=2384993|UniProtKB=Q8VE62	Paip1	Polyadenylate-binding protein-interacting protein 1;Paip1;ortholog
MOUSE|MGI=MGI=1342279|UniProtKB=Q9WVE0	Aicda	Single-stranded DNA cytosine deaminase;Aicda;ortholog
MOUSE|MGI=MGI=1918248|UniProtKB=Q9D4J7	Phf6	PHD finger protein 6;Phf6;ortholog
MOUSE|MGI=MGI=1917826|UniProtKB=Q8BTV2	Cpsf7	Cleavage and polyadenylation specificity factor subunit 7;Cpsf7;ortholog
MOUSE|MGI=MGI=2678085|UniProtKB=Q8CH09	Sugp2	SURP and G-patch domain-containing protein 2;Sugp2;ortholog
MOUSE|MGI=MGI=88192|UniProtKB=Q3TKT4	Smarca4	Transcription activator BRG1;Smarca4;ortholog
MOUSE|MGI=MGI=1930190|UniProtKB=Q6PG95	Cramp1l	Protein cramped-like;Cramp1;ortholog
MOUSE|MGI=MGI=2385231|UniProtKB=Q6WBX7	Rad9b	Cell cycle checkpoint control protein RAD9B;Rad9b;ortholog
MOUSE|MGI=MGI=1923598|UniProtKB=Q6PHZ5	Rbm15b	Putative RNA-binding protein 15B;Rbm15b;ortholog
MOUSE|MGI=MGI=1918764|UniProtKB=Q8VIJ6	Sfpq	Splicing factor, proline- and glutamine-rich;Sfpq;ortholog
MOUSE|MGI=MGI=2446242|UniProtKB=Q7TQH0	Atxn2l	Ataxin-2-like protein;Atxn2l;ortholog
MOUSE|MGI=MGI=108202|UniProtKB=Q61990	Pcbp2	Poly(rC)-binding protein 2;Pcbp2;ortholog
MOUSE|MGI=MGI=1935127|UniProtKB=Q6PGB8	Smarca1	Probable global transcription activator SNF2L1;Smarca1;ortholog
MOUSE|MGI=MGI=1914544|UniProtKB=Q7TT37	Elp1	Elongator complex protein 1;Elp1;ortholog
MOUSE|MGI=MGI=2446126|UniProtKB=B2RQG2	Phf3	PHD finger protein 3;Phf3;ortholog
MOUSE|MGI=MGI=2444505|UniProtKB=Q8BJ34	Marf1	Meiosis regulator and mRNA stability factor 1;Marf1;ortholog
MOUSE|MGI=MGI=98347|UniProtKB=P63163	Snrpn	Small nuclear ribonucleoprotein-associated protein N;Snrpn;ortholog
MOUSE|MGI=MGI=1918066|UniProtKB=Q149F1	Rpusd2	RNA pseudouridylate synthase domain-containing protein 2;Rpusd2;ortholog
MOUSE|MGI=MGI=1890357|UniProtKB=O88477	Igf2bp1	Insulin-like growth factor 2 mRNA-binding protein 1;Igf2bp1;ortholog
MOUSE|MGI=MGI=1341788|UniProtKB=Q6NS46	Pdcd11	Protein RRP5 homolog;Pdcd11;ortholog
MOUSE|MGI=MGI=104671|UniProtKB=P34056	Tfap2a	Transcription factor AP-2-alpha;Tfap2a;ortholog
MOUSE|MGI=MGI=1927224|UniProtKB=Q9CR11	Yeats4	YEATS domain-containing protein 4;Yeats4;ortholog
MOUSE|MGI=MGI=2685159|UniProtKB=B2RXZ1	Pnldc1	Poly(A)-specific ribonuclease PNLDC1;Pnldc1;ortholog
MOUSE|MGI=MGI=2177178|UniProtKB=Q8R418	Dicer1	Endoribonuclease Dicer;Dicer1;ortholog
MOUSE|MGI=MGI=1328310|UniProtKB=F8VPP8	Zc3h7b	Zinc finger CCCH type-containing 7B;Zc3h7b;ortholog
MOUSE|MGI=MGI=1313312|UniProtKB=Q9R226	Khdrbs3	KH domain-containing, RNA-binding, signal transduction-associated protein 3;Khdrbs3;ortholog
MOUSE|MGI=MGI=1917689|UniProtKB=Q8BQ46	Taf15	TAF15 RNA polymerase II, TATA box binding protein (TBP)-associated factor;Taf15;ortholog
MOUSE|MGI=MGI=2686058|UniProtKB=Q6R2P8	Neil2	Endonuclease 8-like 2;Neil2;ortholog
MOUSE|MGI=MGI=1926195|UniProtKB=Q9R0I7	Ylpm1	YLP motif-containing protein 1;Ylpm1;ortholog
MOUSE|MGI=MGI=1915467|UniProtKB=Q7TSC1	Prrc2a	Protein PRRC2A;Prrc2a;ortholog
MOUSE|MGI=MGI=101761|UniProtKB=P52927	Hmga2	High mobility group protein HMGI-C;Hmga2;ortholog
MOUSE|MGI=MGI=1890359|UniProtKB=Q9CPN8	Igf2bp3	Insulin-like growth factor 2 mRNA-binding protein 3;Igf2bp3;ortholog
MOUSE|MGI=MGI=1353633|UniProtKB=P56959	Fus	RNA-binding protein FUS;Fus;ortholog
MOUSE|MGI=MGI=104672|UniProtKB=Q61313	Tfap2b	Transcription factor AP-2-beta;Tfap2b;ortholog
MOUSE|MGI=MGI=98341|UniProtKB=Q62376	Snrnp70	U1 small nuclear ribonucleoprotein 70 kDa;Snrnp70;ortholog
MOUSE|MGI=MGI=1919540|UniProtKB=Q8BUV6	Lsm11	U7 snRNA-associated Sm-like protein LSm11;Lsm11;ortholog
MOUSE|MGI=MGI=1921941|UniProtKB=Q14BI7	Tdrd9	ATP-dependent RNA helicase TDRD9;Tdrd9;ortholog
MOUSE|MGI=MGI=2682295|UniProtKB=Q6PB75	Tent4a	Terminal nucleotidyltransferase 4A;Tent4a;ortholog
MOUSE|MGI=MGI=1277182|UniProtKB=E9Q2N0	Cpsf4l	Cleavage and polyadenylation-specific factor 4-like;Cpsf4l;ortholog
MOUSE|MGI=MGI=1891706|UniProtKB=Q62504	Spen	Msx2-interacting protein;Spen;ortholog
MOUSE|MGI=MGI=891999|UniProtKB=Q91ZS8	Adarb1	Double-stranded RNA-specific editase 1;Adarb1;ortholog
MOUSE|MGI=MGI=1915746|UniProtKB=A3KGA4	Tceal7	Transcription elongation factor A protein-like 7;Tceal7;ortholog
MOUSE|MGI=MGI=108177|UniProtKB=O70133	Dhx9	ATP-dependent RNA helicase A;Dhx9;ortholog
Cytoskeletal protein (PC00085)
MOUSE|MGI=MGI=1314653|UniProtKB=Q9QZQ1	Afdn	Afadin;Afdn;ortholog
MOUSE|MGI=MGI=1333798|UniProtKB=O88398	Avil	Advillin;Avil;ortholog
MOUSE|MGI=MGI=3044681|UniProtKB=P0C7L0	Wipf3	WAS/WASL-interacting protein family member 3;Wipf3;ortholog
MOUSE|MGI=MGI=2388820|UniProtKB=Q8BX51	Sgcz	Zeta-sarcoglycan;Sgcz;ortholog
MOUSE|MGI=MGI=1913589|UniProtKB=A2APC3	Ttll9	Probable tubulin polyglutamylase TTLL9;Ttll9;ortholog
MOUSE|MGI=MGI=1920960|UniProtKB=Q9CWF2	Tubb2b	Tubulin beta-2B chain;Tubb2b;ortholog
MOUSE|MGI=MGI=105100|UniProtKB=P30999	Ctnnd1	Catenin delta-1;Ctnnd1;ortholog
MOUSE|MGI=MGI=1923957|UniProtKB=Q80TV8	Clasp1	CLIP-associating protein 1;Clasp1;ortholog
MOUSE|MGI=MGI=1919397|UniProtKB=Q8BID6	Zbtb46	Zinc finger and BTB domain-containing protein 46;Zbtb46;ortholog
MOUSE|MGI=MGI=1917612|UniProtKB=A2AKE7	Actl10	Actin-like protein 10;Actl10;ortholog
MOUSE|MGI=MGI=1933548|UniProtKB=Q99MR0	Actl6b	Actin-like protein 6B;Actl6b;ortholog
MOUSE|MGI=MGI=2443337|UniProtKB=Q32M02	Fscn2	Fascin-2;Fscn2;ortholog
MOUSE|MGI=MGI=1923902|UniProtKB=Q8BXF8	Actrt3	Actin-related protein T3;Actrt3;ortholog
MOUSE|MGI=MGI=1914502|UniProtKB=Q9CYT6	Cap2	Adenylyl cyclase-associated protein 2;Cap2;ortholog
MOUSE|MGI=MGI=1917176|UniProtKB=Q69Z23	Dnah17	Dynein heavy chain 17, axonemal;Dnah17;ortholog
MOUSE|MGI=MGI=3646919|UniProtKB=J3QK54	Fignl2	Fidgetin-like 2;Fignl2;ortholog
MOUSE|MGI=MGI=105976|UniProtKB=Q99104	Myo5a	Unconventional myosin-Va;Myo5a;ortholog
MOUSE|MGI=MGI=107721|UniProtKB=E9Q8T7	Dnah1	Dynein heavy chain 1, axonemal;Dnah1;ortholog
MOUSE|MGI=MGI=1194898|UniProtKB=Q9R269	Ppl	Periplakin;Ppl;ortholog
MOUSE|MGI=MGI=1920344|UniProtKB=Q8VD37	Sgip1	SH3-containing GRB2-like protein 3-interacting protein 1;Sgip1;ortholog
MOUSE|MGI=MGI=102784|UniProtKB=Q62219	Tgfb1i1	Transforming growth factor beta-1-induced transcript 1 protein;Tgfb1i1;ortholog
MOUSE|MGI=MGI=103147|UniProtKB=Q9JHU4	Dync1h1	Cytoplasmic dynein 1 heavy chain 1;Dync1h1;ortholog
MOUSE|MGI=MGI=2384818|UniProtKB=Q8R1S4	Mtss1	Protein MTSS 1;Mtss1;ortholog
MOUSE|MGI=MGI=1344412|UniProtKB=Q9JKS4	Ldb3	LIM domain-binding protein 3;Ldb3;ortholog
MOUSE|MGI=MGI=2444120|UniProtKB=Q9JJF2	Spag4	Sperm-associated antigen 4 protein;Spag4;ortholog
MOUSE|MGI=MGI=2685838|UniProtKB=E9Q0T8	Dnah7a	Dynein, axonemal, heavy chain 7A;Dnah7a;ortholog
MOUSE|MGI=MGI=107732|UniProtKB=O88329	Myo1a	Unconventional myosin-Ia;Myo1a;ortholog
MOUSE|MGI=MGI=2384878|UniProtKB=Q5DU05	Cep164	Centrosomal protein of 164 kDa;Cep164;ortholog
MOUSE|MGI=MGI=2442591|UniProtKB=Q8BVJ3	BC024139	cDNA sequence BC024139;BC024139;ortholog
MOUSE|MGI=MGI=107736|UniProtKB=Q45VK7	Dync2h1	Cytoplasmic dynein 2 heavy chain 1;Dync2h1;ortholog
MOUSE|MGI=MGI=107979|UniProtKB=O35066	Kif3c	Kinesin-like protein KIF3C;Kif3c;ortholog
MOUSE|MGI=MGI=2446256|UniProtKB=Q8K1S6	Spire2	Protein spire homolog 2;Spire2;ortholog
MOUSE|MGI=MGI=1914701|UniProtKB=Q9CQ73	Pkp2	Plakophilin 2;Pkp2;ortholog
MOUSE|MGI=MGI=2183448|UniProtKB=Q920M5	Coro6	Coronin-6;Coro6;ortholog
MOUSE|MGI=MGI=1346118|UniProtKB=O08641	Sh3yl1	SH3 domain-containing YSC84-like protein 1;Sh3yl1;ortholog
MOUSE|MGI=MGI=1345181|UniProtKB=Q61644	Pacsin1	Protein kinase C and casein kinase substrate in neurons protein 1;Pacsin1;ortholog
MOUSE|MGI=MGI=2447076|UniProtKB=Q7TNC6	Kif26b	Kinesin-like protein KIF26B;Kif26b;ortholog
MOUSE|MGI=MGI=2177957|UniProtKB=Q8CIV2	Tmem259	Membralin;Tmem259;ortholog
MOUSE|MGI=MGI=88549|UniProtKB=P97315	Crp	Cysteine and glycine-rich protein 1;Csrp1;ortholog
MOUSE|MGI=MGI=1926784|UniProtKB=Q9R1Q8	Tagln3	Transgelin-3;Tagln3;ortholog
MOUSE|MGI=MGI=109234|UniProtKB=Q9QXL1	Kif21b	Kinesin-like protein KIF21B;Kif21b;ortholog
MOUSE|MGI=MGI=98544|UniProtKB=Q01755	Tcp11	T-complex protein 11;Tcp11;ortholog
MOUSE|MGI=MGI=3639762|UniProtKB=A0A087WR13	Dnah7c	Dynein, axonemal, heavy chain 7C;Dnah7c;ortholog
MOUSE|MGI=MGI=2140967|UniProtKB=Q6PER3	Ebf3	Microtubule-associated protein RP/EB family member 3;Mapre3;ortholog
MOUSE|MGI=MGI=107814|UniProtKB=A2AQ07	Tubb1	Tubulin beta-1 chain;Tubb1;ortholog
MOUSE|MGI=MGI=2685570|UniProtKB=Q1W617	Shroom4	Protein Shroom4;Shroom4;ortholog
MOUSE|MGI=MGI=1913446|UniProtKB=Q5SV80	Myo19	Unconventional myosin-XIX;Myo19;ortholog
MOUSE|MGI=MGI=1917789|UniProtKB=Q8CI43	Myl6b	Myosin light chain 6B;Myl6b;ortholog
MOUSE|MGI=MGI=108390|UniProtKB=P28740	Kif2a	Kinesin-like protein KIF2A;Kif2a;ortholog
MOUSE|MGI=MGI=1919338|UniProtKB=Q9ES64	Ush1c	Harmonin;Ush1c;ortholog
MOUSE|MGI=MGI=107812|UniProtKB=P99024	Tubb5	Tubulin beta-5 chain;Tubb5;ortholog
MOUSE|MGI=MGI=1351466|UniProtKB=Q9WV52	Plek2	Pleckstrin-2;Plek2;ortholog
MOUSE|MGI=MGI=2386306|UniProtKB=Q8R0W0	Eppk1	Epiplakin;Eppk1;ortholog
MOUSE|MGI=MGI=3039591|UniProtKB=Q6P9S0	Mtss2	Protein MTSS 2;Mtss2;ortholog
MOUSE|MGI=MGI=3608325|UniProtKB=E9Q9W7	Pdzd7	PDZ domain-containing protein 7;Pdzd7;ortholog
MOUSE|MGI=MGI=99670|UniProtKB=Q9WV69	Dmtn	Dematin;Dmtn;ortholog
MOUSE|MGI=MGI=2387181|UniProtKB=Q8CII0	Zbtb8b	Zinc finger and BTB domain-containing protein 8B;Zbtb8b;ortholog
MOUSE|MGI=MGI=2139883|UniProtKB=E9Q8X5	Zbtb10	Zinc finger and BTB domain-containing 10;Zbtb10;ortholog
MOUSE|MGI=MGI=1355285|UniProtKB=Q9JLH8	Tmod4	Tropomodulin-4;Tmod4;ortholog
MOUSE|MGI=MGI=2182079|UniProtKB=Q8VI88	Odf4	Outer dense fiber protein 4;Odf4;ortholog
MOUSE|MGI=MGI=2153070|UniProtKB=Q91YE8	Synpo2	Synaptopodin-2;Synpo2;ortholog
MOUSE|MGI=MGI=2658986|UniProtKB=Q8VHI6	Wasf3	Wiskott-Aldrich syndrome protein family member 3;Wasf3;ortholog
MOUSE|MGI=MGI=1890647|UniProtKB=Q9ERZ6	Fign	Fidgetin;Fign;ortholog
MOUSE|MGI=MGI=107566|UniProtKB=P70188	Kifap3	Kinesin-associated protein 3;Kifap3;ortholog
MOUSE|MGI=MGI=3043381|UniProtKB=Q6P9J5	Kank4	KN motif and ankyrin repeat domain-containing protein 4;Kank4;ortholog
MOUSE|MGI=MGI=2684953|UniProtKB=L7N1Y0	Dnah7b	Dynein, axonemal, heavy chain 7B;Dnah7b;ortholog
MOUSE|MGI=MGI=2685483|UniProtKB=D3Z7H4	Gsg1l	Germ cell-specific gene 1-like protein;Gsg1l;ortholog
MOUSE|MGI=MGI=107813|UniProtKB=Q9ERD7	Tubb3	Tubulin beta-3 chain;Tubb3;ortholog
MOUSE|MGI=MGI=109611|UniProtKB=E9Q557	Dsp	Desmoplakin;Dsp;ortholog
MOUSE|MGI=MGI=1194499|UniProtKB=Q8R1W2	Gsg1	Germ cell-specific gene 1 protein;Gsg1;ortholog
MOUSE|MGI=MGI=1916010|UniProtKB=Q8BWB1	Synpo2l	Synaptopodin 2-like protein;Synpo2l;ortholog
MOUSE|MGI=MGI=2447072|UniProtKB=Q52KG5	Kif26a	Kinesin-like protein KIF26A;Kif26a;ortholog
MOUSE|MGI=MGI=107752|UniProtKB=P46735	Myo1b	Unconventional myosin-Ib;Myo1b;ortholog
MOUSE|MGI=MGI=2152434|UniProtKB=Q6Q6R3	Crip3	Cysteine-rich protein 3;Crip3;ortholog
MOUSE|MGI=MGI=87919|UniProtKB=Q9QYB8	Add2	Beta-adducin;Add2;ortholog
MOUSE|MGI=MGI=1924234|UniProtKB=Q9D3R6	Katnal2	Katanin p60 ATPase-containing subunit A-like 2;Katnal2;ortholog
MOUSE|MGI=MGI=2685402|UniProtKB=Q3UYR4	Espnl	Espin-like protein;Espnl;ortholog
MOUSE|MGI=MGI=108559|UniProtKB=Q9QXZ0	Macf1	Microtubule-actin cross-linking factor 1;Macf1;ortholog
MOUSE|MGI=MGI=2442582|UniProtKB=Q69ZX8	Ablim3	Actin-binding LIM protein 3;Ablim3;ortholog
MOUSE|MGI=MGI=106598|UniProtKB=P21271	Myo5b	Unconventional myosin-Vb;Myo5b;ortholog
Intercellular signal molecule (PC00207)
MOUSE|MGI=MGI=109167|UniProtKB=P70378	Fgf11	Fibroblast growth factor 11;Fgf11;ortholog
MOUSE|MGI=MGI=109252|UniProtKB=Q64151	Sema4c	Semaphorin-4C;Sema4c;ortholog
MOUSE|MGI=MGI=102708|UniProtKB=P52795	Efnb1	Ephrin-B1;Efnb1;ortholog
MOUSE|MGI=MGI=105308|UniProtKB=Q64387	Pnoc	Prepronociceptin;Pnoc;ortholog
MOUSE|MGI=MGI=107557|UniProtKB=Q62181	Sema3c	Semaphorin-3C;Sema3c;ortholog
MOUSE|MGI=MGI=97380|UniProtKB=P20181	Ntf3	Neurotrophin-3;Ntf3;ortholog
MOUSE|MGI=MGI=1097165|UniProtKB=O35181	Nrg3	Pro-neuregulin-3, membrane-bound isoform;Nrg3;ortholog
MOUSE|MGI=MGI=1336197|UniProtKB=G3X9N5	Nxph4	Neurexophilin;Nxph4;ortholog
MOUSE|MGI=MGI=1930008|UniProtKB=Q9EQX0	Ghrl	Appetite-regulating hormone;Ghrl;ortholog
MOUSE|MGI=MGI=1202889|UniProtKB=O54951	Sema6b	Semaphorin-6B;Sema6b;ortholog
MOUSE|MGI=MGI=88182|UniProtKB=P20722	Bmp6	Bone morphogenetic protein 6;Bmp6;ortholog
MOUSE|MGI=MGI=1277980|UniProtKB=O89101	Fgf18	Fibroblast growth factor 18;Fgf18;ortholog
MOUSE|MGI=MGI=98956|UniProtKB=P27467	Wnt3a	Protein Wnt-3a;Wnt3a;ortholog
MOUSE|MGI=MGI=1347047|UniProtKB=Q9WUH7	Sema4g	Semaphorin-4G;Sema4g;ortholog
MOUSE|MGI=MGI=97931|UniProtKB=P47932	Rln1	Prorelaxin 1;Rln1;ortholog
MOUSE|MGI=MGI=1306826|UniProtKB=Q9QUR8	Sema7a	Semaphorin-7A;Sema7a;ortholog
MOUSE|MGI=MGI=104327|UniProtKB=P97466	Nog	Noggin;Nog;ortholog
MOUSE|MGI=MGI=95519|UniProtKB=P15656	Fgf5	Fibroblast growth factor 5;Fgf5;ortholog
MOUSE|MGI=MGI=107559|UniProtKB=Q62179	Sema4b	Semaphorin-4B;Sema4b;ortholog
MOUSE|MGI=MGI=1336188|UniProtKB=Q91VX5	Nxph3	Neurexophilin-3;Nxph3;ortholog
MOUSE|MGI=MGI=96083|UniProtKB=Q6DR99	Nrg1	Neuregulin 1;Nrg1;ortholog
MOUSE|MGI=MGI=107492|UniProtKB=Q61200	Nxph1	Neurexophilin-1;Nxph1;ortholog
MOUSE|MGI=MGI=95692|UniProtKB=Q07105	Gdf9	Growth/differentiation factor 9;Gdf9;ortholog
MOUSE|MGI=MGI=2671932|UniProtKB=J3S6Y1	Tspear	Thrombospondin-type laminin G domain and EAR repeat-containing protein;Tspear;ortholog
MOUSE|MGI=MGI=105097|UniProtKB=P52800	Efnb2	Ephrin-B2;Efnb2;ortholog
MOUSE|MGI=MGI=98958|UniProtKB=P22725	Wnt5a	Protein Wnt-5a;Wnt5a;ortholog
MOUSE|MGI=MGI=98933|UniProtKB=P32648	Vip	VIP peptides;Vip;ortholog
MOUSE|MGI=MGI=107555|UniProtKB=Q60519	Sema5b	Semaphorin-5B;Sema5b;ortholog
MOUSE|MGI=MGI=1922403|UniProtKB=Q14C37	Lemd1	LEM domain-containing protein 1;Lemd1;ortholog
MOUSE|MGI=MGI=1333791|UniProtKB=Q9Z0L2	Artn	Artemin;Artn;ortholog
MOUSE|MGI=MGI=106643|UniProtKB=O08542	Efna4	Ephrin-A4;Efna4;ortholog
MOUSE|MGI=MGI=2685581|UniProtKB=D3Z5L9	Ccn6	Cellular communication network factor 6;Ccn6;ortholog
MOUSE|MGI=MGI=98727|UniProtKB=P17125	Tgfb3	Transforming growth factor beta-3 proprotein;Tgfb3;ortholog
MOUSE|MGI=MGI=94900|UniProtKB=Q09163	Dlk1	Protein delta homolog 1;Dlk1;ortholog
MOUSE|MGI=MGI=1888712|UniProtKB=Q9EQI5	Ppbp	Chemokine (C-X-C motif) ligand 7, isoform CRA_b;Ppbp;ortholog
MOUSE|MGI=MGI=98953|UniProtKB=P04426	Wnt1	Proto-oncogene Wnt-1;Wnt1;ortholog
MOUSE|MGI=MGI=1343180|UniProtKB=Q0VGU4	Vgf	Neurosecretory protein VGF;Vgf;ortholog
MOUSE|MGI=MGI=98258|UniProtKB=P10146	Ccl1	C-C motif chemokine 1;Ccl1;ortholog
MOUSE|MGI=MGI=109178|UniProtKB=P70377	Fgf13	Fibroblast growth factor 13;Fgf13;ortholog
MOUSE|MGI=MGI=106644|UniProtKB=O08545	Efna3	Ephrin-A3;Efna3;ortholog
MOUSE|MGI=MGI=109189|UniProtKB=P70379	Fgf14	Fibroblast growth factor 14;Fgf14;ortholog
MOUSE|MGI=MGI=1338027|UniProtKB=Q9Z1W4	Gdf11	Growth/differentiation factor 11;Gdf11;ortholog
MOUSE|MGI=MGI=1861731|UniProtKB=Q9JIL2	Ccl28	C-C motif chemokine 28;Ccl28;ortholog
MOUSE|MGI=MGI=88145|UniProtKB=P21237	Bdnf	Brain-derived neurotrophic factor;Bdnf;ortholog
MOUSE|MGI=MGI=1888711|UniProtKB=Q9Z126	Pf4	Platelet factor 4;Pf4;ortholog
MOUSE|MGI=MGI=2446084|UniProtKB=Q8R5M2	Wnt9a	Protein Wnt-9a;Wnt9a;ortholog
MOUSE|MGI=MGI=1353627|UniProtKB=Q9R182	Angptl3	Angiopoietin-related protein 3;Angptl3;ortholog
MOUSE|MGI=MGI=1099809|UniProtKB=O35565	Fgf10	Fibroblast growth factor 10;Fgf10;ortholog
MOUSE|MGI=MGI=95688|UniProtKB=P43027	Gdf5	Growth/differentiation factor 5;Gdf5;ortholog
MOUSE|MGI=MGI=1328326|UniProtKB=Q9Z0G4	Ccn5	WNT1-inducible-signaling pathway protein 2;Wisp2;ortholog
MOUSE|MGI=MGI=98959|UniProtKB=P22726	Wnt5b	Protein Wnt-5b;Wnt5b;ortholog
MOUSE|MGI=MGI=1202401|UniProtKB=P63075	Fgf17	Fibroblast growth factor 17;Fgf17;ortholog
MOUSE|MGI=MGI=104723|UniProtKB=P54130	Fgf9	Fibroblast growth factor 9;Fgf9;ortholog
MOUSE|MGI=MGI=96569|UniProtKB=Q04997	Inha	Inhibin alpha chain;Inha;ortholog
MOUSE|MGI=MGI=1096383|UniProtKB=O35622	Fgf15	Fibroblast growth factor 15;Fgf15;ortholog
MOUSE|MGI=MGI=1344332|UniProtKB=Q9WUA1	Wif1	Wnt inhibitory factor 1;Wif1;ortholog
MOUSE|MGI=MGI=107558|UniProtKB=O08665	Sema3a	Semaphorin-3A;Sema3a;ortholog
MOUSE|MGI=MGI=95690|UniProtKB=P43029	Gdf7	Growth/differentiation factor 7;Gdf7;ortholog
MOUSE|MGI=MGI=1202890|UniProtKB=O35608	Angpt2	Angiopoietin-2;Angpt2;ortholog
MOUSE|MGI=MGI=97374|UniProtKB=P57774	Npy	Pro-neuropeptide Y;Npy;ortholog
MOUSE|MGI=MGI=1316731|UniProtKB=O88452	Stc2	Stanniocalcin-2;Stc2;ortholog
MOUSE|MGI=MGI=1921749|UniProtKB=Q99P68	Sost	Sclerostin;Sost;ortholog
MOUSE|MGI=MGI=2138953|UniProtKB=A2AV25	Fibcd1	Fibrinogen C domain-containing protein 1;Fibcd1;ortholog
MOUSE|MGI=MGI=2180370|UniProtKB=Q14A28	Prok1	Prokineticin-1;Prok1;ortholog
MOUSE|MGI=MGI=97763|UniProtKB=Q08501	Prlr	Prolactin receptor;Prlr;ortholog
MOUSE|MGI=MGI=1096347|UniProtKB=O88632	Sema3f	Semaphorin-3F;Sema3f;ortholog
MOUSE|MGI=MGI=98326|UniProtKB=P60041	Sst,Sms	Somatostatin;Sst;ortholog
MOUSE|MGI=MGI=109538|UniProtKB=P56469	Cort	Cortistatin;Cort;ortholog
MOUSE|MGI=MGI=109131|UniProtKB=O55183	Stc1	Stanniocalcin-1;Stc1;ortholog
MOUSE|MGI=MGI=98957|UniProtKB=P22724	Wnt4	Protein Wnt-4;Wnt4;ortholog
Protein-binding activity modulator (PC00095)
MOUSE|MGI=MGI=2651588|UniProtKB=Q8VHQ2	Socs7	Suppressor of cytokine signaling 7;Socs7;ortholog
MOUSE|MGI=MGI=1921452|UniProtKB=Q71FD7	Fblim1	Filamin-binding LIM protein 1;Fblim1;ortholog
MOUSE|MGI=MGI=109514|UniProtKB=Q62426	Cst6	Cystatin-B;Cstb;ortholog
MOUSE|MGI=MGI=2443881|UniProtKB=E9PW37	Rasal2	RAS protein activator-like 2;Rasal2;ortholog
MOUSE|MGI=MGI=3036245|UniProtKB=A3KGS3	Ralgapa2	Ral GTPase-activating protein subunit alpha-2;Ralgapa2;ortholog
MOUSE|MGI=MGI=3611446|UniProtKB=Q68EF8	Rapgefl1	Rap guanine nucleotide exchange factor-like 1;Rapgefl1;ortholog
MOUSE|MGI=MGI=2146636|UniProtKB=Q9ESB3	Hrg	Histidine-rich glycoprotein;Hrg;ortholog
MOUSE|MGI=MGI=101764|UniProtKB=P61809	Cdk5r1	Cyclin-dependent kinase 5 activator 1;Cdk5r1;ortholog
MOUSE|MGI=MGI=108466|UniProtKB=Q62172	Rbp1	RalA-binding protein 1;Ralbp1;ortholog
MOUSE|MGI=MGI=2183442|UniProtKB=Q91Z61	Diras1	GTP-binding protein Di-Ras1;Diras1;ortholog
MOUSE|MGI=MGI=95776|UniProtKB=P21279	Gnaq	Guanine nucleotide-binding protein G(q) subunit alpha;Gnaq;ortholog
MOUSE|MGI=MGI=1927230|UniProtKB=Q0KL02	Trio	Triple functional domain protein;Trio;ortholog
MOUSE|MGI=MGI=1916851|UniProtKB=Q3UHC7	Dab2ip	Disabled homolog 2-interacting protein;Dab2ip;ortholog
MOUSE|MGI=MGI=2445175|UniProtKB=Q6IFT4	Arhgap20	Rho GTPase-activating protein 20;Arhgap20;ortholog
MOUSE|MGI=MGI=1194506|UniProtKB=O35684	Serpini1	Neuroserpin;Serpini1;ortholog
MOUSE|MGI=MGI=1918996|UniProtKB=Q3UYI5	Rgl3	Ral guanine nucleotide dissociation stimulator-like 3;Rgl3;ortholog
MOUSE|MGI=MGI=1353431|UniProtKB=Q9QXV0	Pcsk1	ProSAAS;Pcsk1n;ortholog
MOUSE|MGI=MGI=2384589|UniProtKB=E9PZP8	Herc1	HECT and RLD domain-containing E3 ubiquitin protein ligase family member 1;Herc1;ortholog
MOUSE|MGI=MGI=2665139|UniProtKB=Q8R367	Rerg	Ras-related and estrogen-regulated growth inhibitor;Rerg;ortholog
MOUSE|MGI=MGI=2442179|UniProtKB=Q8BFR2	Fstl5	Follistatin-related protein 5;Fstl5;ortholog
MOUSE|MGI=MGI=2140327|UniProtKB=Q501J7	Phactr4	Phosphatase and actin regulator 4;Phactr4;ortholog
MOUSE|MGI=MGI=103234|UniProtKB=Q4U2R1	Herc2	E3 ubiquitin-protein ligase HERC2;Herc2;ortholog
MOUSE|MGI=MGI=103263|UniProtKB=Q64096	Mcf2l	Guanine nucleotide exchange factor DBS;Mcf2l;ortholog
MOUSE|MGI=MGI=2445221|UniProtKB=Q8R422	Cd109	CD109 antigen;Cd109;ortholog
MOUSE|MGI=MGI=1915453|UniProtKB=Q5PR73	Diras2	GTP-binding protein Di-Ras2;Diras2;ortholog
MOUSE|MGI=MGI=2443199|UniProtKB=Q5STE3	Fstl4	Follistatin-related protein 4;Fstl4;ortholog
MOUSE|MGI=MGI=2676458|UniProtKB=A2AWP0	Birc7	Baculoviral IAP repeat-containing protein 7;Birc7;ortholog
MOUSE|MGI=MGI=1926022|UniProtKB=Q9D2G9	Hhipl2	HHIP-like protein 2;Hhipl2;ortholog
MOUSE|MGI=MGI=1330828|UniProtKB=O35926	Cdk5r2	Cyclin-dependent kinase 5 activator 2;Cdk5r2;ortholog
MOUSE|MGI=MGI=95779|UniProtKB=P50149	Gnat2	Guanine nucleotide-binding protein G(t) subunit alpha-2;Gnat2;ortholog
MOUSE|MGI=MGI=1298375|UniProtKB=G3X8Q1	Cabin1	Calcineurin binding protein 1, isoform CRA_a;Cabin1;ortholog
MOUSE|MGI=MGI=2385326|UniProtKB=Q8R3D1	Tbc1d13	TBC1 domain family member 13;Tbc1d13;ortholog
MOUSE|MGI=MGI=2443456|UniProtKB=Q3UUG6	Tbc1d24	TBC1 domain family member 24;Tbc1d24;ortholog
MOUSE|MGI=MGI=1277173|UniProtKB=Q9CWR0	Arhgef25	Rho guanine nucleotide exchange factor 25;Arhgef25;ortholog
MOUSE|MGI=MGI=104566|UniProtKB=P52734	Fgd1	FYVE, RhoGEF and PH domain-containing protein 1;Fgd1;ortholog
MOUSE|MGI=MGI=1915303|UniProtKB=Q0KL01	Ubxn2b	UBX domain-containing protein 2B;Ubxn2b;ortholog
MOUSE|MGI=MGI=1914546|UniProtKB=Q91ZA6	Socs7	Suppressor of cytokine signaling 4;Socs4;ortholog
MOUSE|MGI=MGI=1276106|UniProtKB=O88874	Ccnk	Cyclin-K;Ccnk;ortholog
MOUSE|MGI=MGI=1920297|UniProtKB=Q78WH7	Camk2n2	Calcium/calmodulin-dependent protein kinase II inhibitor 2;Camk2n2;ortholog
MOUSE|MGI=MGI=2652878|UniProtKB=A2ABG4	Tbc1d16	TBC1 domain family, member 16;Tbc1d16;ortholog
MOUSE|MGI=MGI=2385695|UniProtKB=Q921Q7	Rin1	Ras and Rab interactor 1;Rin1;ortholog
MOUSE|MGI=MGI=2180784|UniProtKB=P60764	Rac3	Ras-related C3 botulinum toxin substrate 3;Rac3;ortholog
MOUSE|MGI=MGI=2673002|UniProtKB=Q80U35	Arhgef17	Rho guanine nucleotide exchange factor 17;Arhgef17;ortholog
MOUSE|MGI=MGI=2145790|UniProtKB=Q8BRJ4	Ppp1r3e	Protein phosphatase 1 regulatory subunit 3E;Ppp1r3e;ortholog
MOUSE|MGI=MGI=108408|UniProtKB=Q8BXT1	Rgs8	Regulator of G-protein signaling 8;Rgs8;ortholog
MOUSE|MGI=MGI=2441842|UniProtKB=Q5XK03	Serinc4	Serine incorporator 4;Serinc4;ortholog
MOUSE|MGI=MGI=2152938|UniProtKB=Q812A2	Srgap3	SLIT-ROBO Rho GTPase-activating protein 3;Srgap3;ortholog
MOUSE|MGI=MGI=1919265|UniProtKB=Q14DK5	Hhipl1	HHIP-like protein 1;Hhipl1;ortholog
MOUSE|MGI=MGI=97306|UniProtKB=Q04690	Nf1	Neurofibromin;Nf1;ortholog
MOUSE|MGI=MGI=1100856|UniProtKB=O08989	Mras	Ras-related protein M-Ras;Mras;ortholog
MOUSE|MGI=MGI=2152936|UniProtKB=Q91Z69	Srgap1	SLIT-ROBO Rho GTPase-activating protein 1;Srgap1;ortholog
MOUSE|MGI=MGI=2141101|UniProtKB=P61460	Depdc5	GATOR complex protein DEPDC5;Depdc5;ortholog
MOUSE|MGI=MGI=88313|UniProtKB=P25322	Ccnd1	G1/S-specific cyclin-D1;Ccnd1;ortholog
MOUSE|MGI=MGI=1922387|UniProtKB=Q6NXI6	Rprd2	Regulation of nuclear pre-mRNA domain-containing protein 2;Rprd2;ortholog
MOUSE|MGI=MGI=3039785|UniProtKB=F6SEU4	Syngap1	Ras/Rap GTPase-activating protein SynGAP;Syngap1;ortholog
MOUSE|MGI=MGI=1098604|UniProtKB=Q7TT45	Rragd	Ras-related GTP-binding protein D;Rragd;ortholog
MOUSE|MGI=MGI=96440|UniProtKB=Q07079	Igfbp5	Insulin-like growth factor-binding protein 5;Igfbp5;ortholog
MOUSE|MGI=MGI=102705|UniProtKB=P63213	Gng2	Guanine nucleotide-binding protein G(I)/G(S)/G(O) subunit gamma-2;Gng2;ortholog
MOUSE|MGI=MGI=2685233|UniProtKB=Q14B62	Ptchd1	Patched domain-containing protein 1;ptchd1;ortholog
MOUSE|MGI=MGI=1922654|UniProtKB=B1AUC7	Arhgap36	Rho GTPase-activating protein 36;Arhgap36;ortholog
MOUSE|MGI=MGI=1914549|UniProtKB=Q8R1A4	Dock7	Dedicator of cytokinesis protein 7;Dock7;ortholog
MOUSE|MGI=MGI=108042|UniProtKB=Q61456	Ccna1	Cyclin-A1;Ccna1;ortholog
MOUSE|MGI=MGI=2384892|UniProtKB=Q8JZN7	Rhot2	Mitochondrial Rho GTPase 2;Rhot2;ortholog
MOUSE|MGI=MGI=1919132|UniProtKB=Q8K0E7	Serinc2	Serine incorporator 2;Serinc2;ortholog
MOUSE|MGI=MGI=2429763|UniProtKB=Q8CIQ7	Dock3	Dedicator of cytokinesis protein 3;Dock3;ortholog
MOUSE|MGI=MGI=97608|UniProtKB=P22777	Serpine1	Plasminogen activator inhibitor 1;Serpine1;ortholog
MOUSE|MGI=MGI=104747|UniProtKB=P63248	Pkia	cAMP-dependent protein kinase inhibitor alpha;Pkia;ortholog
MOUSE|MGI=MGI=3649852|UniProtKB=E9Q6X9	Arhgap40	Rho GTPase-activating protein 40;Arhgap40;ortholog
MOUSE|MGI=MGI=2443297|UniProtKB=Q3TZI6	Ccnj	Cyclin-J;Ccnj;ortholog
MOUSE|MGI=MGI=1925505|UniProtKB=Q9ERD6	Ralgps2	Ras-specific guanine nucleotide-releasing factor RalGPS2;Ralgps2;ortholog
Scaffold/adaptor protein (PC00226)
MOUSE|MGI=MGI=3045316|UniProtKB=Q8CDE2	Ccin	Calicin;Ccin;ortholog
MOUSE|MGI=MGI=1277959|UniProtKB=Q62108	Dlg4	Disks large homolog 4;Dlg4;ortholog
MOUSE|MGI=MGI=1920858|UniProtKB=Q9D956	Marveld3	MARVEL domain-containing protein 3;Marveld3;ortholog
MOUSE|MGI=MGI=3651622|UniProtKB=A2AM80	Fam43b	Family with sequence similarity 43, member B;Fam43b;ortholog
MOUSE|MGI=MGI=2443181|UniProtKB=Q8BJ42	Dlgap2	Disks large-associated protein 2;Dlgap2;ortholog
MOUSE|MGI=MGI=2683536|UniProtKB=Q6GQU2	Klhl23	Kelch-like protein 23;Klhl23;ortholog
MOUSE|MGI=MGI=1915033|UniProtKB=Q8CJF7	Ahctf1	Protein ELYS;Ahctf1;ortholog
MOUSE|MGI=MGI=1194884|UniProtKB=P70429	Evl	Ena/VASP-like protein;Evl;ortholog
MOUSE|MGI=MGI=1929751|UniProtKB=Q9WV71	Asb4	Ankyrin repeat and SOCS box protein 4;Asb4;ortholog
MOUSE|MGI=MGI=2181067|UniProtKB=Q9D5V2	Klhl10	Kelch-like protein 10;Klhl10;ortholog
MOUSE|MGI=MGI=2145950|UniProtKB=Q80U72	Scrib	Protein scribble homolog;Scrib;ortholog
MOUSE|MGI=MGI=2385276|UniProtKB=Q8K0E1	Kctd15	BTB/POZ domain-containing protein KCTD15;Kctd15;ortholog
MOUSE|MGI=MGI=2388648|UniProtKB=Q8CE33	Klhl11	Kelch-like protein 11;Klhl11;ortholog
MOUSE|MGI=MGI=2443804|UniProtKB=Q50H33	Kctd8	BTB/POZ domain-containing protein KCTD8;Kctd8;ortholog
MOUSE|MGI=MGI=2444248|UniProtKB=E9PVA8	Gcn1	eIF-2-alpha kinase activator GCN1;Gcn1;ortholog
MOUSE|MGI=MGI=1919434|UniProtKB=Q9CZ49	Klhl35	Kelch-like protein 35;Klhl35;ortholog
MOUSE|MGI=MGI=2148149|UniProtKB=Q6PCZ4	Magee1	Melanoma-associated antigen E1;Magee1;ortholog
MOUSE|MGI=MGI=3036228|UniProtKB=B2RPU2	Plekhd1	Pleckstrin homology domain-containing family D member 1;Plekhd1;ortholog
MOUSE|MGI=MGI=2136335|UniProtKB=Q9JI74	Klhl1	Kelch-like protein 1;Klhl1;ortholog
MOUSE|MGI=MGI=1918038|UniProtKB=Q8C3F7	Klhl30	Kelch-like protein 30;Klhl30;ortholog
MOUSE|MGI=MGI=1924557|UniProtKB=Q8BGI7	Lrrc39	Leucine-rich repeat-containing protein 39;Lrrc39;ortholog
MOUSE|MGI=MGI=1344351|UniProtKB=Q91XM9	Dlg2	Disks large homolog 2;Dlg2;ortholog
MOUSE|MGI=MGI=2444654|UniProtKB=Q6PDH4	Ranbp3l	Ran-binding protein 3-like;Ranbp3l;ortholog
MOUSE|MGI=MGI=2136419|UniProtKB=Q6PDS3	Sarm1	Sterile alpha and TIR motif-containing protein 1;Sarm1;ortholog
MOUSE|MGI=MGI=2684949|UniProtKB=Q5VCS6	Tdrd5	Tudor domain-containing protein 5;Tdrd5;ortholog
MOUSE|MGI=MGI=1924568|UniProtKB=Q8BLD6	Ankrd55	Ankyrin repeat domain-containing protein 55;Ankrd55;ortholog
MOUSE|MGI=MGI=1918348|UniProtKB=Q6A065	Cep170	Centrosomal protein of 170 kDa;Cep170;ortholog
MOUSE|MGI=MGI=2138865|UniProtKB=B1AZP2	Dlgap4	Disks large-associated protein 4;Dlgap4;ortholog
MOUSE|MGI=MGI=103232|UniProtKB=Q60760	Grb10	Growth factor receptor-bound protein 10;Grb10;ortholog
MOUSE|MGI=MGI=2652847|UniProtKB=Q80WG5	Lrrc8a	Volume-regulated anion channel subunit LRRC8A;Lrrc8a;ortholog
MOUSE|MGI=MGI=1098783|UniProtKB=Q61085	Rhpn1	Rhophilin-1;Rhpn1;ortholog
MOUSE|MGI=MGI=3651644|UniProtKB=A2A9G7	Shisal2a	Protein shisa-like-2A;Shisal2a;ortholog
MOUSE|MGI=MGI=1351648|UniProtKB=Q9QZ04	Magel2	MAGE-like protein 2;Magel2;ortholog
MOUSE|MGI=MGI=2150019|UniProtKB=Q924S7	Spred2	Sprouty-related, EVH1 domain-containing protein 2;Spred2;ortholog
MOUSE|MGI=MGI=2676665|UniProtKB=Q80TE7	Lrrc7	Leucine-rich repeat-containing protein 7;Lrrc7;ortholog
MOUSE|MGI=MGI=106921|UniProtKB=Q56A07	Scn2b	Sodium channel subunit beta-2;Scn2b;ortholog
MOUSE|MGI=MGI=2685537|UniProtKB=Q6PDS0	Vstm2l	V-set and transmembrane domain-containing protein 2-like protein;Vstm2l;ortholog
MOUSE|MGI=MGI=3039563|UniProtKB=Q6PFD5	Dlgap3	Disks large-associated protein 3;Dlgap3;ortholog
MOUSE|MGI=MGI=2142186|UniProtKB=Q6P6N5	Spred3	Sprouty-related, EVH1 domain-containing protein 3;Spred3;ortholog
MOUSE|MGI=MGI=2445185|UniProtKB=E0CZ16	Klhl3	Kelch-like protein 3;Klhl3;ortholog
MOUSE|MGI=MGI=1098644|UniProtKB=Q3V1N1	Mfhas1	Malignant fibrous histiocytoma-amplified sequence 1 homolog;Mfhas1;ortholog
MOUSE|MGI=MGI=1924550|UniProtKB=F2Z3U3	Raph1	Ras association (RalGDS/AF-6) and pleckstrin homology domains 1;Raph1;ortholog
MOUSE|MGI=MGI=1918128|UniProtKB=Q3TVA9	Ccdc136	Coiled-coil domain-containing protein 136;Ccdc136;ortholog
MOUSE|MGI=MGI=108109|UniProtKB=P61982	Ywhag	14-3-3 protein gamma;Ywhag;ortholog
MOUSE|MGI=MGI=1196453|UniProtKB=Q8BUL5	Klhl7	Kelch-like protein 7;Klhl7;ortholog
MOUSE|MGI=MGI=2444236|UniProtKB=Q80WC1	Ubn2	Ubinuclein-2;Ubn2;ortholog
MOUSE|MGI=MGI=3045299|UniProtKB=Q8C0R9	Lrrd1	Leucine-rich repeat and death domain-containing protein 1;Lrrd1;ortholog
MOUSE|MGI=MGI=1353420|UniProtKB=Q9R000	Itgb1bp2	Integrin beta-1-binding protein 2;Itgb1bp2;ortholog
MOUSE|MGI=MGI=894702|UniProtKB=O08919	Numbl	Numb-like protein;Numbl;ortholog
MOUSE|MGI=MGI=1919231|UniProtKB=Q9CWU0	Tdrd12	Putative ATP-dependent RNA helicase TDRD12;Tdrd12;ortholog
MOUSE|MGI=MGI=3041225|UniProtKB=Q3UPR0	Shisa3	Protein shisa-3 homolog;Shisa3;ortholog
MOUSE|MGI=MGI=1922805|UniProtKB=Q99PB1	1700020D05Rik	Mage-g2;1700020D05Rik;ortholog
MOUSE|MGI=MGI=1930187|UniProtKB=Q9QYH6	Maged1	Melanoma-associated antigen D1;Maged1;ortholog
MOUSE|MGI=MGI=108360|UniProtKB=Q03173	Enah	Protein enabled homolog;Enah;ortholog
MOUSE|MGI=MGI=1916052|UniProtKB=Q5DTJ9	Mypn	Myopalladin;Mypn;ortholog
MOUSE|MGI=MGI=105109|UniProtKB=Q9D2H4	Mageb3	MAGEB3;Mageb3;ortholog
MOUSE|MGI=MGI=1920496|UniProtKB=Q80UQ2	Rassf6	Ras association domain-containing protein 6;Rassf6;ortholog
MOUSE|MGI=MGI=3045310|UniProtKB=Q8BSF5	Klhl38	Kelch-like protein 38;Klhl38;ortholog
MOUSE|MGI=MGI=1933218|UniProtKB=Q99MV1	Tdrd1	Tudor domain-containing protein 1;Tdrd1;ortholog
MOUSE|MGI=MGI=2679007|UniProtKB=Q8BYZ7	Elmo3	Engulfment and cell motility protein 3;Elmo3;ortholog
MOUSE|MGI=MGI=1338023|UniProtKB=Q9WUX5	Mrvi1	Protein MRVI1;Mrvi1;ortholog
MOUSE|MGI=MGI=2145043|UniProtKB=Q80U49	Cep170b	Centrosomal protein of 170 kDa protein B;Cep170b;ortholog
MOUSE|MGI=MGI=1918269|UniProtKB=Q5M956	Kctd1	BTB/POZ domain-containing protein KCTD1;Kctd1;ortholog
MOUSE|MGI=MGI=1921462|UniProtKB=Q05A62	Dnal1	Dynein light chain 1, axonemal;Dnal1;ortholog
MOUSE|MGI=MGI=1914659|UniProtKB=Q5DTY9	Kctd16	BTB/POZ domain-containing protein KCTD16;Kctd16;ortholog
MOUSE|MGI=MGI=3042287|UniProtKB=P68500	Cntn5	Contactin-5;Cntn5;ortholog
MOUSE|MGI=MGI=1914235|UniProtKB=Q9DD19	Rassf7	Ras association domain-containing protein 7;Rassf7;ortholog
MOUSE|MGI=MGI=1889209|UniProtKB=Q9Z2H7	Gipc2	PDZ domain-containing protein GIPC2;Gipc2;ortholog
Membrane traffic protein (PC00150)
MOUSE|MGI=MGI=1922858|UniProtKB=Q9D8B3	Chmp4b	Charged multivesicular body protein 4b;Chmp4b;ortholog
MOUSE|MGI=MGI=2142888|UniProtKB=Q8CJ61	Cmtm4	CKLF-like MARVEL transmembrane domain-containing protein 4;Cmtm4;ortholog
MOUSE|MGI=MGI=1328311|UniProtKB=O89104	Sypl2	Synaptophysin-like protein 2;Sypl2;ortholog
MOUSE|MGI=MGI=2146620|UniProtKB=Q7TQ48	Srl	Sarcalumenin;Srl;ortholog
MOUSE|MGI=MGI=98460|UniProtKB=O88935	Syn1	Synapsin-1;Syn1;ortholog
MOUSE|MGI=MGI=1098749|UniProtKB=Q6PH08	Erc2	ERC protein 2;Erc2;ortholog
MOUSE|MGI=MGI=2151013|UniProtKB=Q99MI1	Erc1	ELKS/Rab6-interacting/CAST family member 1;Erc1;ortholog
MOUSE|MGI=MGI=1932289|UniProtKB=Q9EPR5	Sorcs2	VPS10 domain-containing receptor SorCS2;Sorcs2;ortholog
MOUSE|MGI=MGI=2144837|UniProtKB=Q6PB44	Ptpn23	Tyrosine-protein phosphatase non-receptor type 23;Ptpn23;ortholog
MOUSE|MGI=MGI=1926368|UniProtKB=Q9R0N5	Syt5	Synaptotagmin-5;Syt5;ortholog
MOUSE|MGI=MGI=1860297|UniProtKB=B2RUJ5	Apba1	Amyloid-beta A4 precursor protein-binding family A member 1;Apba1;ortholog
MOUSE|MGI=MGI=1922915|UniProtKB=A0JNT9	Bicdl1	BICD family-like cargo adapter 1;Bicdl1;ortholog
MOUSE|MGI=MGI=1338069|UniProtKB=Q9Z0R4	Itsn1	Intersectin-1;Itsn1;ortholog
MOUSE|MGI=MGI=1921812|UniProtKB=A3KGK3	Fer1l4	Fer-1-like protein 4;Fer1l4;ortholog
MOUSE|MGI=MGI=1919253|UniProtKB=Q8BGN8	Synpr	Synaptoporin;Synpr;ortholog
MOUSE|MGI=MGI=1920574|UniProtKB=Q5M6W3	Clhc1	Clathrin heavy chain linker domain-containing protein 1;Clhc1;ortholog
MOUSE|MGI=MGI=1337060|UniProtKB=Q8BSZ2	Ap3s2	AP-3 complex subunit sigma-2;Ap3s2;ortholog
MOUSE|MGI=MGI=1100869|UniProtKB=Q9JME5	Ap3b2	AP-3 complex subunit beta-2;Ap3b2;ortholog
MOUSE|MGI=MGI=107384|UniProtKB=P39053	Dnm1	Dynamin-1;Dnm1;ortholog
MOUSE|MGI=MGI=1923411|UniProtKB=Q9D387	Lamp5	Lysosome-associated membrane glycoprotein 5;Lamp5;ortholog
MOUSE|MGI=MGI=1921713|UniProtKB=D3YUP5	Exoc3l2	Exocyst complex component 3-like 2;Exoc3l2;ortholog
MOUSE|MGI=MGI=1924307|UniProtKB=Q8CDJ8	Ston1	Stonin-1;Ston1;ortholog
MOUSE|MGI=MGI=1337063|UniProtKB=Q9JKC7	Ap4m1	AP-4 complex subunit mu-1;Ap4m1;ortholog
MOUSE|MGI=MGI=2146021|UniProtKB=Q8BI08	Mal2	Protein MAL2;Mal2;ortholog
MOUSE|MGI=MGI=1298397|UniProtKB=Q9Z0F7	Sncg	Gamma-synuclein;Sncg;ortholog
MOUSE|MGI=MGI=1859544|UniProtKB=Q9R0N8	Syt6	Synaptotagmin-6;Syt6;ortholog
MOUSE|MGI=MGI=1919935|UniProtKB=Q80TZ3	Dnajc6	Putative tyrosine-protein phosphatase auxilin;Dnajc6;ortholog
MOUSE|MGI=MGI=1919020|UniProtKB=Q9DBG3	Ap2b1	AP-2 complex subunit beta;Ap2b1;ortholog
MOUSE|MGI=MGI=2385156|UniProtKB=Q99JZ0	Sdcbp2	Syntenin-2;Sdcbp2;ortholog
MOUSE|MGI=MGI=3645398|UniProtKB=E0CZ42	Fer1l6	Fer-1-like 6 (C. elegans);Fer1l6;ortholog
MOUSE|MGI=MGI=88081|UniProtKB=P34927	Asgr1	Asialoglycoprotein receptor 1;Asgr1;ortholog
MOUSE|MGI=MGI=2442708|UniProtKB=Q8BH49	Pheta1	Sesquipedalian-1;Pheta1;ortholog
MOUSE|MGI=MGI=107363|UniProtKB=O08599	Stxbp1	Syntaxin-binding protein 1;Stxbp1;ortholog
MOUSE|MGI=MGI=99665|UniProtKB=O35681	Syt3	Synaptotagmin-3;Syt3;ortholog
MOUSE|MGI=MGI=1920228|UniProtKB=Q6ZWS4	Cnih3	Protein cornichon homolog 3;Cnih3;ortholog
MOUSE|MGI=MGI=1915266|UniProtKB=A2AMM0	Cavin4	Caveolae-associated protein 4;Cavin4;ortholog
MOUSE|MGI=MGI=1925213|UniProtKB=Q8BIL5	Hook1	Protein Hook homolog 1;Hook1;ortholog
MOUSE|MGI=MGI=99666|UniProtKB=P46097	Syt2	Synaptotagmin-2;Syt2;ortholog
MOUSE|MGI=MGI=2139270|UniProtKB=Q80U23	Snph	Syntaphilin;Snph;ortholog
MOUSE|MGI=MGI=2671945|UniProtKB=Q8VBT1	Txlnb	Beta-taxilin;Txlnb;ortholog
MOUSE|MGI=MGI=101759|UniProtKB=P40749	Syt4,Syt3	Synaptotagmin-4;Syt4;ortholog
MOUSE|MGI=MGI=1350922|UniProtKB=Q80TJ1	Cadps	Calcium-dependent secretion activator 1;Cadps;ortholog
MOUSE|MGI=MGI=1913923|UniProtKB=Q8VI51	Sorcs3	VPS10 domain-containing receptor SorCS3;Sorcs3;ortholog
MOUSE|MGI=MGI=2178743|UniProtKB=Q8R4U0	Stab2	Stabilin-2;Stab2;ortholog
MOUSE|MGI=MGI=1929897|UniProtKB=Q9ER65	Clstn2	Calsyntenin-2;Clstn2;ortholog
MOUSE|MGI=MGI=109355|UniProtKB=O35526	Stx1a	Syntaxin-1A;Stx1a;ortholog
MOUSE|MGI=MGI=1277225|UniProtKB=O35089	Cnih2	Protein cornichon homolog 2;Cnih2;ortholog
MOUSE|MGI=MGI=2441659|UniProtKB=Q7TST5	Lamp3	Lysosome-associated membrane glycoprotein 3;Lamp3;ortholog
MOUSE|MGI=MGI=2178323|UniProtKB=Q99JH7	Clstn3	Calsyntenin-3;Clstn3;ortholog
MOUSE|MGI=MGI=1933945|UniProtKB=Q9EQT6	Syt13	Synaptotagmin-13;Syt13;ortholog
MOUSE|MGI=MGI=98467|UniProtKB=Q62277	Syp	Synaptophysin;Syp;ortholog
MOUSE|MGI=MGI=2385070|UniProtKB=Q8VCD6	Reep2	Receptor expression-enhancing protein 2;Reep2;ortholog
MOUSE|MGI=MGI=1859545|UniProtKB=Q9R0N7	Syt7	Synaptotagmin-7;Syt7;ortholog
MOUSE|MGI=MGI=1930705|UniProtKB=P61264	Stx1b	Syntaxin-1B;Stx1b;ortholog
MOUSE|MGI=MGI=2443331|UniProtKB=Q80U57	Rims3	Regulating synaptic membrane exocytosis protein 3;Rims3;ortholog
MOUSE|MGI=MGI=99667|UniProtKB=P46096	Syt1	Synaptotagmin-1;Syt1;ortholog
MOUSE|MGI=MGI=98331|UniProtKB=P60879	Snap25	Synaptosomal-associated protein 25;Snap25;ortholog
MOUSE|MGI=MGI=1889011|UniProtKB=Q91ZZ3	Sncb	Beta-synuclein;Sncb;ortholog
MOUSE|MGI=MGI=1915076|UniProtKB=Q8R570	Snap47	Synaptosomal-associated protein 47;Snap47;ortholog
Extracellular matrix protein (PC00102)
MOUSE|MGI=MGI=105088|UniProtKB=O09118	Ntn1	Netrin-1;Ntn1;ortholog
MOUSE|MGI=MGI=99909|UniProtKB=Q61789	Lama3	Laminin subunit alpha-3;Lama3;ortholog
MOUSE|MGI=MGI=2685177|UniProtKB=Q6DIB5	Megf10	Multiple epidermal growth factor-like domains protein 10;Megf10;ortholog
MOUSE|MGI=MGI=105371|UniProtKB=Q62288	Spock1	Testican-1;Spock1;ortholog
MOUSE|MGI=MGI=2684334|UniProtKB=Q70UZ7	Vwa2	von Willebrand factor A domain-containing protein 2;Vwa2;ortholog
MOUSE|MGI=MGI=1891351|UniProtKB=Q9ER58	Spock2	Testican-2;Spock2;ortholog
MOUSE|MGI=MGI=1341272|UniProtKB=Q80X19	Col14a1	Collagen alpha-1(XIV) chain;Col14a1;ortholog
MOUSE|MGI=MGI=1916114|UniProtKB=Q8VED9	Lgalsl	Galectin-related protein;Lgalsl;ortholog
MOUSE|MGI=MGI=3045253|UniProtKB=Q66PY1	Scube3	Signal peptide, CUB and EGF-like domain-containing protein 3;Scube3;ortholog
MOUSE|MGI=MGI=1934028|UniProtKB=Q8R4G0	Ntng1	Netrin-G1;Ntng1;ortholog
MOUSE|MGI=MGI=102889|UniProtKB=Q62059	Vcan	Versican core protein;Vcan;ortholog
MOUSE|MGI=MGI=88452|UniProtKB=P28481	Col2a1	Collagen alpha-1(II) chain;Col2a1;ortholog
MOUSE|MGI=MGI=108110|UniProtKB=P70663	Ecm2	SPARC-like protein 1;Sparcl1;ortholog
MOUSE|Ensembl=ENSMUSG00000109372|UniProtKB=A0A140LJC7	Gm19410	Predicted gene, 19410;Gm19410;ortholog
MOUSE|MGI=MGI=1922990|UniProtKB=Q8C088	Egfem1	EGF-like and EMI domain-containing protein 1;Egfem1;ortholog
MOUSE|MGI=MGI=106656|UniProtKB=O88799	Zan	Zonadhesin;Zan;ortholog
MOUSE|MGI=MGI=105382|UniProtKB=Q61001	Lama5	Laminin subunit alpha-5;Lama5;ortholog
MOUSE|MGI=MGI=1278313|UniProtKB=Q62507	Coch	Cochlin;Coch;ortholog
MOUSE|MGI=MGI=2445053|UniProtKB=Q3MI99	Ccbe1	Collagen and calcium-binding EGF domain-containing protein 1;Ccbe1;ortholog
MOUSE|MGI=MGI=1928765|UniProtKB=Q9JJS0	Scube2	Signal peptide, CUB and EGF-like domain-containing protein 2;Scube2;ortholog
MOUSE|MGI=MGI=1202064|UniProtKB=O55225	Otog	Otogelin;Otog;ortholog
MOUSE|MGI=MGI=3044955|UniProtKB=Q80XH2	Impg2	Interphotoreceptor matrix proteoglycan 2;Impg2;ortholog
MOUSE|MGI=MGI=1341292|UniProtKB=Q2QI47	Ush2a	Usherin;Ush2A;ortholog
MOUSE|MGI=MGI=2685260|UniProtKB=Q4ZJM7	Otol1	Otolin-1;Otol1;ortholog
MOUSE|MGI=MGI=2685330|UniProtKB=Q3UQ22	Ntn5	Netrin-5;Ntn5;ortholog
MOUSE|MGI=MGI=2446294|UniProtKB=P60882	Megf8	Multiple epidermal growth factor-like domains protein 8;Megf8;ortholog
MOUSE|MGI=MGI=109151|UniProtKB=Q8CG19	Ltbp1	Latent-transforming growth factor beta-binding protein 1;Ltbp1;ortholog
MOUSE|MGI=MGI=1924268|UniProtKB=Q99MQ5	Col25a1	Collagen alpha-1(XXV) chain;Col25a1;ortholog
MOUSE|MGI=MGI=1888978|UniProtKB=Q9JI33	Ntn4	Netrin-4;Ntn4;ortholog
MOUSE|MGI=MGI=1919351|UniProtKB=Q80V70	Megf6	Multiple epidermal growth factor-like domains protein 6;Megf6;ortholog
MOUSE|MGI=MGI=1316742|UniProtKB=O54974	Lgals7	Galectin-7;Lgals7;ortholog
MOUSE|MGI=MGI=2679531|UniProtKB=Q80WM4	Hapln4	Hyaluronan and proteoglycan link protein 4;Hapln4;ortholog
MOUSE|MGI=MGI=99913|UniProtKB=Q61092	Lamc2	Laminin subunit gamma-2;Lamc2;ortholog
MOUSE|MGI=MGI=87961|UniProtKB=A2ASQ1	Agrn	Agrin;Agrn;ortholog
MOUSE|MGI=MGI=103022|UniProtKB=Q60841	Reln	Reelin;Reln;ortholog
MOUSE|MGI=MGI=2151113|UniProtKB=Q920A0	Optc	Opticin;Optc;ortholog
MOUSE|MGI=MGI=2663233|UniProtKB=Q80T03	Muc6	Mucin-6;Muc6;ortholog
MOUSE|MGI=MGI=1929094|UniProtKB=Q91VD1	Lgals12	Galectin-12;Lgals12;ortholog
MOUSE|MGI=MGI=1095415|UniProtKB=Q0VF58	Col19a1	Collagen alpha-1(XIX) chain;Col19a1;ortholog
Chromatin/chromatin-binding, or -regulatory protein (PC00077)
MOUSE|MGI=MGI=108447|UniProtKB=O35381	Anp32a	Acidic leucine-rich nuclear phosphoprotein 32 family member A;Anp32a;ortholog
MOUSE|MGI=MGI=1278322|UniProtKB=Q8C9X6	Epc1	Enhancer of polycomb homolog 1;Epc1;ortholog
MOUSE|MGI=MGI=2143628|UniProtKB=Q8BLB7	L3mbtl3	Lethal(3)malignant brain tumor-like protein 3;L3mbtl3;ortholog
MOUSE|MGI=MGI=3529431|UniProtKB=Q8CJ40	Crocc	Rootletin;Crocc;ortholog
MOUSE|MGI=MGI=1917377|UniProtKB=P58269	Dpf3	Zinc finger protein DPF3;Dpf3;ortholog
MOUSE|MGI=MGI=2143977|UniProtKB=Q6P5G3	Mbtd1	MBT domain-containing protein 1;Mbtd1;ortholog
MOUSE|MGI=MGI=2446140|UniProtKB=Q80VG1	Scml4	Sex comb on midleg-like protein 4;Scml4;ortholog
MOUSE|MGI=MGI=1923356|UniProtKB=Q6ZPY7	Kdm3b	Lysine-specific demethylase 3B;Kdm3b;ortholog
MOUSE|MGI=MGI=2152406|UniProtKB=Q924W6	Trim66	Tripartite motif-containing protein 66;Trim66;ortholog
MOUSE|MGI=MGI=2137357|UniProtKB=Q99PP7	Trim33	E3 ubiquitin-protein ligase TRIM33;Trim33;ortholog
MOUSE|MGI=MGI=1918291|UniProtKB=Q99NA9	Pcgf6	Polycomb group RING finger protein 6;Pcgf6;ortholog
MOUSE|MGI=MGI=99430|UniProtKB=Q61666	Hira	Protein HIRA;Hira;ortholog
MOUSE|MGI=MGI=2446210|UniProtKB=Q8BW72	Kdm4a	Lysine-specific demethylase 4A;Kdm4a;ortholog
MOUSE|MGI=MGI=1933623|UniProtKB=Q61466	Smarcd1	SWI/SNF-related matrix-associated actin-dependent regulator of chromatin subfamily D member 1;Smarcd1;ortholog
MOUSE|MGI=MGI=2446220|UniProtKB=Q1RNF8	Samd11	Sterile alpha motif domain-containing protein 11;Samd11;ortholog
MOUSE|MGI=MGI=1890948|UniProtKB=Q920B9	Supt16	FACT complex subunit SPT16;Supt16h;ortholog
MOUSE|MGI=MGI=1278321|UniProtKB=Q8C0I4	Epc2	Enhancer of polycomb homolog 2;Epc2;ortholog
MOUSE|MGI=MGI=1333752|UniProtKB=Q9Z2V5	Hdac6	Histone deacetylase 6;Hdac6;ortholog
MOUSE|MGI=MGI=105050|UniProtKB=Q02395	Mtf2	Metal-response element-binding transcription factor 2;Mtf2;ortholog
MOUSE|MGI=MGI=2446244|UniProtKB=E9PYH6	Setd1a	Histone-lysine N-methyltransferase SETD1A;Setd1a;ortholog
MOUSE|MGI=MGI=2442355|UniProtKB=Q91VY5	Kdm4b	Lysine-specific demethylase 4B;Kdm4b;ortholog
MOUSE|MGI=MGI=1097691|UniProtKB=P70288	Hdac2	Histone deacetylase 2;Hdac2;ortholog
MOUSE|MGI=MGI=1922855|UniProtKB=Q80Y84	Kdm5b	Lysine-specific demethylase 5B;Kdm5b;ortholog
MOUSE|MGI=MGI=1337080|UniProtKB=Q9WU42	Ncor2	Nuclear receptor corepressor 2;Ncor2;ortholog
MOUSE|MGI=MGI=96120|UniProtKB=P18608	Hmgn1	Non-histone chromosomal protein HMG-14;Hmgn1;ortholog
MOUSE|MGI=MGI=2442415|UniProtKB=Q8BZ21	Kat6a	Histone acetyltransferase KAT6A;Kat6a;ortholog
MOUSE|MGI=MGI=2444228|UniProtKB=Q8VDP4	Ccar2	Cell cycle and apoptosis regulator protein 2;Ccar2;ortholog
MOUSE|MGI=MGI=109275|UniProtKB=Q64127	Trim24	Transcription intermediary factor 1-alpha;Trim24;ortholog
MOUSE|MGI=MGI=1891835|UniProtKB=Q8C2B3	Hdac7	Histone deacetylase 7;Hdac7;ortholog
MOUSE|MGI=MGI=1914617|UniProtKB=P58501	Paxbp1	PAX3- and PAX7-binding protein 1;Paxbp1;ortholog
MOUSE|MGI=MGI=2442458|UniProtKB=Q69ZB3	Tspyl5	Testis-specific Y-encoded-like protein 5;Tspyl5;ortholog
MOUSE|MGI=MGI=2143886|UniProtKB=Q6XZL8	Dot1l	Histone-lysine N-methyltransferase, H3 lysine-79 specific;Dot1l;ortholog
MOUSE|MGI=MGI=106654|UniProtKB=P51860	Nap1l2	Nucleosome assembly protein 1-like 2;Nap1l2;ortholog
MOUSE|MGI=MGI=2685063|UniProtKB=Q6NY15	Tsga10	Testis-specific gene 10 protein;Tsga10;ortholog
MOUSE|MGI=MGI=2442410|UniProtKB=Q6PIJ4	Nfrkb	Nuclear factor related to kappa-B-binding protein;Nfrkb;ortholog
MOUSE|MGI=MGI=1858746|UniProtKB=Q8BRB7	Kat6b	Histone acetyltransferase KAT6B;Kat6b;ortholog
MOUSE|MGI=MGI=1352748|UniProtKB=Q9QX66	Dpf1	Zinc finger protein neuro-d4;Dpf1;ortholog
Cell adhesion molecule (PC00069)
MOUSE|MGI=MGI=3045256|UniProtKB=Q2PZL6	Fat4	Protocadherin Fat 4;Fat4;ortholog
MOUSE|MGI=MGI=2136343|UniProtKB=Q8VHS2	Crb1	Protein crumbs homolog 1;Crb1;ortholog
MOUSE|MGI=MGI=1858235|UniProtKB=Q9R0M0	Celsr2	Cadherin EGF LAG seven-pass G-type receptor 2;Celsr2;ortholog
MOUSE|MGI=MGI=1100883|UniProtKB=O35161	Celsr1	Cadherin EGF LAG seven-pass G-type receptor 1;Celsr1;ortholog
MOUSE|MGI=MGI=1916102|UniProtKB=Q3TYX2	Lrrn4cl	LRRN4 C-terminal-like protein;Lrrn4cl;ortholog
MOUSE|MGI=MGI=2443925|UniProtKB=Q6P4U0	Thsd7b	Thrombospondin type-1 domain-containing protein 7B;Thsd7b;ortholog
MOUSE|MGI=MGI=109168|UniProtKB=A0A1L1SQU7	Fat1	FAT atypical cadherin 1;Fat1;ortholog
MOUSE|MGI=MGI=2385287|UniProtKB=Q8VCC9	Spon1	Spondin-1;Spon1;ortholog
MOUSE|MGI=MGI=3607710|UniProtKB=Q8C160	Mslnl	Mesothelin-like protein;Mslnl;ortholog
MOUSE|MGI=MGI=2441680|UniProtKB=B1AWJ5	Tmem8b	Transmembrane protein 8B;Tmem8b;ortholog
MOUSE|MGI=MGI=2149209|UniProtKB=Q8K561	Otoa	Otoancorin;Otoa;ortholog
MOUSE|MGI=MGI=97231|UniProtKB=Q02496	Muc1	Mucin-1;Muc1;ortholog
MOUSE|MGI=MGI=2444277|UniProtKB=Q5RKR3	Islr2	Immunoglobulin superfamily containing leucine-rich repeat protein 2;Islr2;ortholog
MOUSE|MGI=MGI=2153816|UniProtKB=Q8VIM6	Strc	Stereocilin;Strc;ortholog
MOUSE|MGI=MGI=2685369|UniProtKB=Q5F226	Fat2	Protocadherin Fat 2;Fat2;ortholog
Defense/immunity protein (PC00090)
MOUSE|MGI=MGI=95902|UniProtKB=Q3UUV9	H2-Eb2	Histocompatibility 2, class II antigen E beta2;H2-Eb2;ortholog
MOUSE|MGI=MGI=1934666|UniProtKB=Q8CGD2	Crispld1	Cysteine-rich secretory protein LCCL domain-containing 1;Crispld1;ortholog
MOUSE|MGI=MGI=2179720|UniProtKB=Q8VBT3	Oscar	Osteoclast-associated immunoglobulin-like receptor;Oscar;ortholog
MOUSE|MGI=MGI=2183926|UniProtKB=Q8VE98	Cd276	CD276 antigen;Cd276;ortholog
MOUSE|MGI=MGI=96493|UniProtKB=P01592	Jchain	Immunoglobulin J chain;Jchain;ortholog
MOUSE|MGI=MGI=1932101|UniProtKB=Q99NH0	Ankrd17	Ankyrin repeat domain-containing protein 17;Ankrd17;ortholog
MOUSE|MGI=MGI=1277114|UniProtKB=Q9WV91	Ptgfrn	Prostaglandin F2 receptor negative regulator;Ptgfrn;ortholog
MOUSE|MGI=MGI=1934368|UniProtKB=Q3U0X8	Cd96	T-cell surface protein tactile;Cd96;ortholog
MOUSE|MGI=MGI=1347249|UniProtKB=Q8K0U8	Psg16	Pregnancy-specific glycoprotein 16;Psg16;ortholog
MOUSE|MGI=MGI=2672935|UniProtKB=Q7TSQ1	Clec18a	C-type lectin domain family 18 member A;Clec18a;ortholog
Translational protein (PC00263)
MOUSE|MGI=MGI=2681839|UniProtKB=Q14CH7	Aars2	Alanine--tRNA ligase, mitochondrial;Aars2;ortholog
MOUSE|MGI=MGI=1859158|UniProtKB=Q8CCS6	Pabpn1	Polyadenylate-binding protein 2;Pabpn1;ortholog
MOUSE|MGI=MGI=1918325|UniProtKB=Q80WS1	Rimklb	Beta-citrylglutamate synthase B;Rimklb;ortholog
MOUSE|MGI=MGI=1925836|UniProtKB=Q497V5	Srbd1	S1 RNA-binding domain-containing protein 1;Srbd1;ortholog
MOUSE|MGI=MGI=2389091|UniProtKB=P62245	Rps15a	40S ribosomal protein S15a;Rps15a;ortholog
MOUSE|MGI=MGI=1860138|UniProtKB=Q3UJK4	Gtpbp2	GTP-binding protein 2;Gtpbp2;ortholog
MOUSE|MGI=MGI=109198|UniProtKB=P70445	Eif4ebp2	Eukaryotic translation initiation factor 4E-binding protein 2;Eif4ebp2;ortholog
MOUSE|MGI=MGI=1349431|UniProtKB=Q9Z0N1	Eif2s3x	Eukaryotic translation initiation factor 2 subunit 3, X-linked;Eif2s3x;ortholog
MOUSE|MGI=MGI=2384784|UniProtKB=Q6NZJ6	Eif4g1	Eukaryotic translation initiation factor 4 gamma 1;Eif4g1;ortholog
MOUSE|MGI=MGI=1096317|UniProtKB=P62631	Eef1a2	Elongation factor 1-alpha 2;Eef1a2;ortholog
Chaperone (PC00072)
MOUSE|MGI=MGI=1919439|UniProtKB=Q9Z1R2	Bag6	Large proline-rich protein BAG6;Bag6;ortholog
MOUSE|MGI=MGI=1890811|UniProtKB=Q80W85	Npm2	Nucleoplasmin-2;Npm2;ortholog
MOUSE|MGI=MGI=1313136|UniProtKB=Q9Z0H8	Clip2	CAP-Gly domain-containing linker protein 2;Clip2;ortholog
MOUSE|MGI=MGI=3649546|UniProtKB=Q3ULQ2	Pin1rt1	Peptidyl-prolyl cis-trans isomerase;Pin1rt1;ortholog
MOUSE|MGI=MGI=894653|UniProtKB=Q9CPP0	Npm3	Nucleoplasmin-3;Npm3;ortholog
MOUSE|MGI=MGI=1355328|UniProtKB=Q99MD9	Nasp	Nuclear autoantigenic sperm protein;Nasp;ortholog
Cell junction protein (PC00070)
MOUSE|MGI=MGI=95717|UniProtKB=Q6S5G4	Gja6	Gap junction alpha-6 protein;Gja6;ortholog
MOUSE|MGI=MGI=2135605|UniProtKB=Q9JK83	Pard6b	Partitioning defective 6 homolog beta;Pard6b;ortholog
MOUSE|MGI=MGI=1919158|UniProtKB=Q9D7D7	Cldn23	Claudin-23;Cldn23;ortholog
MOUSE|MGI=MGI=1334209|UniProtKB=O54851	Gjd2	Gap junction delta-2 protein;Gjd2;ortholog
MOUSE|MGI=MGI=2384150|UniProtKB=Q91YD1	Gjd3	Gap junction delta-3 protein;Gjd3;ortholog
MOUSE|MGI=MGI=2135609|UniProtKB=Q8JZS0	Lin7a	Protein lin-7 homolog A;Lin7a;ortholog
Structural protein (PC00211)
MOUSE|MGI=MGI=109517|UniProtKB=P21841	Sp5	Pulmonary surfactant-associated protein C;Sftpc;ortholog
MOUSE|MGI=MGI=1860437|UniProtKB=O88998	Olfm1	Noelin;Olfm1;ortholog
MOUSE|MGI=MGI=2387329|UniProtKB=P63056	Olfm3	Noelin-3;Olfm3;ortholog
MOUSE|MGI=MGI=2682064|UniProtKB=Q6VH22	Ift172	Intraflagellar transport protein 172 homolog;Ift172;ortholog
MOUSE|MGI=MGI=109343|UniProtKB=P57016	Lad1	Ladinin-1;Lad1;ortholog
MOUSE|MGI=MGI=1916537|UniProtKB=Q920N1	Odf3	Outer dense fiber protein 3;Odf3;ortholog
Calcium-binding protein (PC00060)
MOUSE|MGI=MGI=1922850|UniProtKB=Q91WQ9	Calml4	Calmodulin-like protein 4;Calml4;ortholog
MOUSE|MGI=MGI=1917037|UniProtKB=Q99JG3	Anxa13	Annexin A13;Anxa13;ortholog
MOUSE|MGI=MGI=1858510|UniProtKB=Q61220	Nell2	Protein kinase C-binding protein NELL2;Nell2;ortholog
MOUSE|MGI=MGI=1923711|UniProtKB=Q9JHQ0	Anxa9	Annexin A9;Anxa9;ortholog
MOUSE|MGI=MGI=1929878|UniProtKB=Q8BLY1	Smoc1	SPARC-related modular calcium-binding protein 1;Smoc1;ortholog
Transfer/carrier protein (PC00219)
MOUSE|MGI=MGI=1340044|UniProtKB=Q924X6	Lrp8	Low-density lipoprotein receptor-related protein 8;Lrp8;ortholog
MOUSE|MGI=MGI=2443223|UniProtKB=Q8BG92	Clvs2	Clavesin-2;Clvs2;ortholog
MOUSE|MGI=MGI=1349451|UniProtKB=Q9Z319	Corin	Atrial natriuretic peptide-converting enzyme;Corin;ortholog
MOUSE|MGI=MGI=3584516|UniProtKB=E9Q1T6	Lrp3	Low density lipoprotein receptor-related protein 3;Lrp3;ortholog
MOUSE|MGI=MGI=1353421|UniProtKB=Q9R0R1	Meltf	Melanotransferrin;Meltf;ortholog

## Sheet: Postnatal
Gene ID	Gene symbol	Gene name
Metabolite interconversion enzyme (PC00262)
MOUSE|MGI=MGI=97776|UniProtKB=Q9CS42	Prps2	Ribose-phosphate pyrophosphokinase 2;Prps2;ortholog
MOUSE|MGI=MGI=2384841|UniProtKB=Q8C025	Chpt1	Cholinephosphotransferase 1;Chpt1;ortholog
MOUSE|MGI=MGI=2385325|UniProtKB=A2AJ88	Pnpla7	Patatin-like phospholipase domain-containing protein 7;Pnpla7;ortholog
MOUSE|MGI=MGI=1270843|UniProtKB=O55057	Pde6d	Retinal rod rhodopsin-sensitive cGMP 3',5'-cyclic phosphodiesterase subunit delta;Pde6d;ortholog
MOUSE|MGI=MGI=1926952|UniProtKB=P56395	Cyb5a	Cytochrome b5;Cyb5a;ortholog
MOUSE|MGI=MGI=104887|UniProtKB=P11352	Gpx1	Glutathione peroxidase 1;Gpx1;ortholog
MOUSE|MGI=MGI=1340032|UniProtKB=Q9D110	Mthfs	5-formyltetrahydrofolate cyclo-ligase;Mthfs;ortholog
MOUSE|MGI=MGI=95852|UniProtKB=P51855	Gss	Glutathione synthetase;Gss;ortholog
MOUSE|MGI=MGI=97830|UniProtKB=Q9WUB3	Pygm	Glycogen phosphorylase, muscle form;Pygm;ortholog
MOUSE|MGI=MGI=95705|UniProtKB=P15535	B4galt1	Beta-1,4-galactosyltransferase 1;B4galt1;ortholog
MOUSE|MGI=MGI=1913697|UniProtKB=Q9CPU4	Mgst3	Microsomal glutathione S-transferase 3;Mgst3;ortholog
MOUSE|MGI=MGI=1914380|UniProtKB=Q9CQZ5	Ndufa6	NADH dehydrogenase [ubiquinone] 1 alpha subcomplex subunit 6;Ndufa6;ortholog
MOUSE|MGI=MGI=1278330|UniProtKB=O70572	Smpd2	Sphingomyelin phosphodiesterase 2;Smpd2;ortholog
MOUSE|MGI=MGI=1096863|UniProtKB=O55026	Entpd2	Ectonucleoside triphosphate diphosphohydrolase 2;Entpd2;ortholog
MOUSE|MGI=MGI=1861622|UniProtKB=Q9JLJ2	Aldh9a1	4-trimethylaminobutyraldehyde dehydrogenase;Aldh9a1;ortholog
MOUSE|MGI=MGI=1321385|UniProtKB=Q9WUZ9	Entpd5	Ectonucleoside triphosphate diphosphohydrolase 5;Entpd5;ortholog
MOUSE|MGI=MGI=1316715|UniProtKB=P48771	Cox7a2	Cytochrome c oxidase subunit 7A2, mitochondrial;Cox7a2;ortholog
MOUSE|MGI=MGI=2444835|UniProtKB=Q8BGC4	Zadh2	Prostaglandin reductase-3;Zadh2;ortholog
MOUSE|MGI=MGI=1888742|UniProtKB=Q9JKV7	Extl1	Exostosin-like 1;Extl1;ortholog
MOUSE|MGI=MGI=88476|UniProtKB=Q61147	Cp	Ceruloplasmin;Cp;ortholog
MOUSE|MGI=MGI=104888|UniProtKB=Q920E5	Fdps	Farnesyl pyrophosphate synthase;Fdps;ortholog
MOUSE|MGI=MGI=97788|UniProtKB=Q99LS3	Psph	Phosphoserine phosphatase;Psph;ortholog
MOUSE|MGI=MGI=2442664|UniProtKB=Q8CC86	Naprt	Nicotinate phosphoribosyltransferase;Naprt;ortholog
MOUSE|MGI=MGI=2687283|UniProtKB=Q5SWZ9	Pld6	Mitochondrial cardiolipin hydrolase;Pld6;ortholog
MOUSE|MGI=MGI=1915448|UniProtKB=Q9CPU2	Ndufb2	NADH dehydrogenase [ubiquinone] 1 beta subcomplex subunit 2, mitochondrial;Ndufb2;ortholog
MOUSE|MGI=MGI=2652816|UniProtKB=Q3U0B3	Dhrs11	Dehydrogenase/reductase SDR family member 11;Dhrs11;ortholog
MOUSE|MGI=MGI=107498|UniProtKB=Q60860	Ltc4s	Leukotriene C4 synthase;Ltc4s;ortholog
MOUSE|MGI=MGI=1924144|UniProtKB=Q9DCL4	Mettl15	Probable methyltransferase-like protein 15;Mettl15;ortholog
MOUSE|MGI=MGI=1925224|UniProtKB=Q8BYK4	Rdh12	Retinol dehydrogenase 12;Rdh12;ortholog
MOUSE|MGI=MGI=1914084|UniProtKB=Q9CQR4	Acot13	Acyl-coenzyme A thioesterase 13;Acot13;ortholog
MOUSE|MGI=MGI=1891640|UniProtKB=Q8C7U7	Galnt6	Polypeptide N-acetylgalactosaminyltransferase 6;Galnt6;ortholog
MOUSE|MGI=MGI=97365|UniProtKB=P23492	Pnp	Purine nucleoside phosphorylase;Pnp;ortholog
MOUSE|MGI=MGI=894320|UniProtKB=O08709	Prdx5,Prdx6	Peroxiredoxin-6;Prdx6;ortholog
MOUSE|MGI=MGI=1921258|UniProtKB=Q3TYD4	Arsg	Arylsulfatase G;Arsg;ortholog
MOUSE|MGI=MGI=104841|UniProtKB=P36552	Cpox	Oxygen-dependent coproporphyrinogen-III oxidase, mitochondrial;Cpox;ortholog
MOUSE|MGI=MGI=2384748|UniProtKB=Q5F2L2	Fut10	Alpha-(1,3)-fucosyltransferase 10;Fut10;ortholog
MOUSE|MGI=MGI=1338011|UniProtKB=Q9JLZ3	Auh	Methylglutaconyl-CoA hydratase, mitochondrial;Auh;ortholog
MOUSE|MGI=MGI=88594|UniProtKB=Q9DBG1	Cyp27a1	Sterol 26-hydroxylase, mitochondrial;Cyp27a1;ortholog
MOUSE|MGI=MGI=1343124|UniProtKB=Q6YGZ1	Hpse	Heparanase;Hpse;ortholog
MOUSE|MGI=MGI=107930|UniProtKB=P70181	Pip5k1b	Phosphatidylinositol 4-phosphate 5-kinase type-1 beta;Pip5k1b;ortholog
MOUSE|MGI=MGI=1891372|UniProtKB=Q924Y0	Bbox1	Gamma-butyrobetaine dioxygenase;Bbox1;ortholog
MOUSE|MGI=MGI=97361|UniProtKB=P29477	Nos2	Nitric oxide synthase, inducible;Nos2;ortholog
MOUSE|MGI=MGI=87921|UniProtKB=P00329	Adh1	Alcohol dehydrogenase 1;Adh1;ortholog
MOUSE|MGI=MGI=2140770|UniProtKB=Q8VI95	Oas1d	Inactive 2'-5'-oligoadenylate synthase 1D;Oas1d;ortholog
MOUSE|MGI=MGI=2183102|UniProtKB=Q99LB7	Sardh	Sarcosine dehydrogenase, mitochondrial;Sardh;ortholog
MOUSE|MGI=MGI=102563|UniProtKB=P29812	Dct	L-dopachrome tautomerase;Dct;ortholog
MOUSE|MGI=MGI=1913402|UniProtKB=Q8R1I1	Uqcr10	Cytochrome b-c1 complex subunit 9;Uqcr10;ortholog
MOUSE|MGI=MGI=1923236|UniProtKB=A2AS89	Auh	Agmatinase, mitochondrial;Agmat;ortholog
MOUSE|MGI=MGI=2443191|UniProtKB=Q8BLF1	Nceh1	Neutral cholesterol ester hydrolase 1;Nceh1;ortholog
MOUSE|MGI=MGI=1096353|UniProtKB=P97328	Khk	Ketohexokinase;Khk;ortholog
MOUSE|MGI=MGI=88413|UniProtKB=P07310	Ckm	Creatine kinase M-type;Ckm;ortholog
MOUSE|MGI=MGI=1096344|UniProtKB=O08739	Ampd3	AMP deaminase 3;Ampd3;ortholog
MOUSE|MGI=MGI=1914166|UniProtKB=Q9CR61	Ndufb7	NADH dehydrogenase [ubiquinone] 1 beta subcomplex subunit 7;Ndufb7;ortholog
MOUSE|MGI=MGI=1919182|UniProtKB=Q3V1F8	Ephx3	Epoxide hydrolase 3;Ephx3;ortholog
MOUSE|MGI=MGI=98266|UniProtKB=Q64442	Sord	Sorbitol dehydrogenase;Sord;ortholog
MOUSE|MGI=MGI=2441717|UniProtKB=Q8C042	Eno4	Enolase 4;Eno4;ortholog
MOUSE|MGI=MGI=103226|UniProtKB=P17665	Cox7c	Cytochrome c oxidase subunit 7C, mitochondrial;Cox7c;ortholog
MOUSE|MGI=MGI=2148491|UniProtKB=Q921H8	Acaa1a	3-ketoacyl-CoA thiolase A, peroxisomal;Acaa1a;ortholog
MOUSE|MGI=MGI=104649|UniProtKB=P43023	Cox6a2	Cytochrome c oxidase subunit 6A2, mitochondrial;Cox6a2;ortholog
MOUSE|MGI=MGI=1321390|UniProtKB=Q9R1E6	Enpp2	Ectonucleotide pyrophosphatase/phosphodiesterase family member 2;Enpp2;ortholog
MOUSE|MGI=MGI=1336888|UniProtKB=Q8BG37	Prdx6b	MCG48959;Prdx6b;ortholog
MOUSE|MGI=MGI=96759|UniProtKB=P06151	Ldha	L-lactate dehydrogenase A chain;Ldha;ortholog
MOUSE|MGI=MGI=105977|UniProtKB=P97324	G6pd2	Glucose-6-phosphate 1-dehydrogenase 2;G6pd2;ortholog
MOUSE|MGI=MGI=98731|UniProtKB=P21981	Tgm2	Protein-glutamine gamma-glutamyltransferase 2;Tgm2;ortholog
MOUSE|MGI=MGI=2661364|UniProtKB=Q8BZL1	Neu4	Sialidase-4;Neu4;ortholog
MOUSE|MGI=MGI=2180849|UniProtKB=Q8VI94	Oasl1	2'-5'-oligoadenylate synthase-like protein 1;Oasl1;ortholog
MOUSE|MGI=MGI=102805|UniProtKB=P55772	Entpd1	Ectonucleoside triphosphate diphosphohydrolase 1;Entpd1;ortholog
MOUSE|MGI=MGI=1918974|UniProtKB=G3X982	Aox3	Aldehyde oxidase 3;Aox3;ortholog
MOUSE|MGI=MGI=88610|UniProtKB=Q64464	Cyp3a13	Cytochrome P450 3A13;Cyp3a13;ortholog
MOUSE|MGI=MGI=2140356|UniProtKB=Q8CFX1	H6pd	GDH/6PGL endoplasmic bifunctional protein;H6pd;ortholog
MOUSE|MGI=MGI=3606214|UniProtKB=Q8BYI6	Lpcat2	Lysophosphatidylcholine acyltransferase 2;Lpcat2;ortholog
MOUSE|MGI=MGI=87978|UniProtKB=Q9WTP6	Ak2	Adenylate kinase 2, mitochondrial;Ak2;ortholog
MOUSE|MGI=MGI=1891698|UniProtKB=Q9JLV6	Pnkp	Bifunctional polynucleotide phosphatase/kinase;Pnkp;ortholog
MOUSE|MGI=MGI=1914103|UniProtKB=Q8BJ56	Pnpla2	Patatin-like phospholipase domain-containing protein 2;Pnpla2;ortholog
MOUSE|MGI=MGI=1926003|UniProtKB=Q8K2A6	Lipm	Lipase member M;Lipm;ortholog
MOUSE|MGI=MGI=1926144|UniProtKB=Q9D2R0	Aacs	Acetoacetyl-CoA synthetase;Aacs;ortholog
MOUSE|MGI=MGI=98299|UniProtKB=P50431	Shmt1	Serine hydroxymethyltransferase, cytosolic;Shmt1;ortholog
MOUSE|MGI=MGI=3780112|UniProtKB=Q3V1F1	Cyp4f37	Cytochrome P450, family 4, subfamily f, polypeptide 37;Cyp4f37;ortholog
MOUSE|MGI=MGI=2139793|UniProtKB=Q8BGS7	Cept1	Choline/ethanolaminephosphotransferase 1;Cept1;ortholog
MOUSE|MGI=MGI=1329027|UniProtKB=Q9WU65	Gk2	Glycerol kinase 2;Gk2;ortholog
MOUSE|MGI=MGI=1923513|UniProtKB=Q9DCM2	Gstk1	Glutathione S-transferase kappa 1;Gstk1;ortholog
MOUSE|MGI=MGI=2443327|UniProtKB=Q5MPP0	Fa2h	Fatty acid 2-hydroxylase;Fa2h;ortholog
MOUSE|MGI=MGI=1341877|UniProtKB=Q9WVK8	Cyp46a1	Cholesterol 24-hydroxylase;Cyp46a1;ortholog
MOUSE|MGI=MGI=1917275|UniProtKB=Q91V12	Acot7	Cytosolic acyl coenzyme A thioester hydrolase;Acot7;ortholog
MOUSE|MGI=MGI=1310002|UniProtKB=P50285	Fmo1	Dimethylaniline monooxygenase [N-oxide-forming] 1;Fmo1;ortholog
MOUSE|MGI=MGI=102497|UniProtKB=P03903	mt-Nd4l	NADH-ubiquinone oxidoreductase chain 4L;Mtnd4l;ortholog
MOUSE|MGI=MGI=1354945|UniProtKB=Q9DAX2	Plpp2	Phospholipid phosphatase 2;Plpp2;ortholog
MOUSE|MGI=MGI=1918039|UniProtKB=Q9CXF0	Kynu	Kynureninase;Kynu;ortholog
MOUSE|MGI=MGI=2135760|UniProtKB=Q9JI99	Sgpp1	Sphingosine-1-phosphate phosphatase 1;Sgpp1;ortholog
MOUSE|MGI=MGI=88475|UniProtKB=P19536	Cox5b	Cytochrome c oxidase subunit 5B, mitochondrial;Cox5b;ortholog
MOUSE|MGI=MGI=2385271|UniProtKB=Q923D2	Blvrb	Flavin reductase (NADPH);Blvrb;ortholog
MOUSE|MGI=MGI=1201671|UniProtKB=Q9D2G5	Synj2	Synaptojanin-2;Synj2;ortholog
MOUSE|MGI=MGI=1915166|UniProtKB=Q99JY8	Plpp3	Phospholipid phosphatase 3;Plpp3;ortholog
MOUSE|MGI=MGI=97370|UniProtKB=P06802	Enpp1	Ectonucleotide pyrophosphatase/phosphodiesterase family member 1;Enpp1;ortholog
MOUSE|MGI=MGI=1344405|UniProtKB=O88312	Agr2	Anterior gradient protein 2 homolog;Agr2;ortholog
MOUSE|MGI=MGI=2442446|UniProtKB=Q8C5P5	Nt5dc1	5'-nucleotidase domain-containing protein 1;Nt5dc1;ortholog
MOUSE|MGI=MGI=1923485|UniProtKB=Q8BHA3	Dtd2	D-aminoacyl-tRNA deacylase 2;Dtd2;ortholog
MOUSE|MGI=MGI=1344370|UniProtKB=Q9CQ54	Ndufc2	NADH dehydrogenase [ubiquinone] 1 subunit C2;Ndufc2;ortholog
MOUSE|MGI=MGI=1914434|UniProtKB=Q9ERS2	Ndufa13	NADH dehydrogenase [ubiquinone] 1 alpha subcomplex subunit 13;Ndufa13;ortholog
MOUSE|MGI=MGI=102499|UniProtKB=P03899	mt-Nd3	NADH-ubiquinone oxidoreductase chain 3;Mtnd3;ortholog
MOUSE|MGI=MGI=1923972|UniProtKB=Q6P8J7	Ckmt2	Creatine kinase S-type, mitochondrial;Ckmt2;ortholog
MOUSE|MGI=MGI=1861305|UniProtKB=Q8K2I1	Fntb	Protein farnesyltransferase subunit beta;Fntb;ortholog
MOUSE|MGI=MGI=1916120|UniProtKB=Q32M07	Ak8	Adenylate kinase 8;Ak8;ortholog
MOUSE|MGI=MGI=96916|UniProtKB=Q8BW75	Maob	Amine oxidase [flavin-containing] B;Maob;ortholog
MOUSE|MGI=MGI=105941|UniProtKB=P70290	Mpp1	55 kDa erythrocyte membrane protein;Mpp1;ortholog
MOUSE|MGI=MGI=1921282|UniProtKB=Q9D665	Sdr42e1	Short-chain dehydrogenase/reductase family 42E member 1;Sdr42e1;ortholog
MOUSE|MGI=MGI=97797|UniProtKB=P22437	Ptgs1	Prostaglandin G/H synthase 1;Ptgs1;ortholog
MOUSE|MGI=MGI=96755|UniProtKB=P16301	Lcat	Phosphatidylcholine-sterol acyltransferase;Lcat;ortholog
MOUSE|MGI=MGI=2143535|UniProtKB=Q8VC97	Upb1	Beta-ureidopropionase;Upb1;ortholog
MOUSE|MGI=MGI=1913745|UniProtKB=Q9CQZ6	Ndufb3	NADH dehydrogenase [ubiquinone] 1 beta subcomplex subunit 3;Ndufb3;ortholog
MOUSE|MGI=MGI=1277964|UniProtKB=Q9DBM2	Ehhadh	Peroxisomal bifunctional enzyme;Ehhadh;ortholog
MOUSE|MGI=MGI=95640|UniProtKB=P16858	Gapdh	Glyceraldehyde-3-phosphate dehydrogenase;Gapdh;ortholog
MOUSE|MGI=MGI=107474|UniProtKB=P56528	Cd38	ADP-ribosyl cyclase/cyclic ADP-ribose hydrolase 1;Cd38;ortholog
MOUSE|MGI=MGI=1929657|UniProtKB=Q9QXE0	Hacl1	2-hydroxyacyl-CoA lyase 1;Hacl1;ortholog
MOUSE|MGI=MGI=107822|UniProtKB=P70245	Ebp	3-beta-hydroxysteroid-Delta(8),Delta(7)-isomerase;Ebp;ortholog
MOUSE|MGI=MGI=1890410|UniProtKB=Q9QXG4	Acss2	Acetyl-coenzyme A synthetase, cytoplasmic;Acss2;ortholog
MOUSE|MGI=MGI=104683|UniProtKB=Q61239	Fnta	Protein farnesyltransferase/geranylgeranyltransferase type-1 subunit alpha;Fnta;ortholog
MOUSE|MGI=MGI=1914175|UniProtKB=Q9CXV1	Sdhd	Succinate dehydrogenase [ubiquinone] cytochrome b small subunit, mitochondrial;Sdhd;ortholog
MOUSE|MGI=MGI=98497|UniProtKB=P36423	Tbxas1	Thromboxane-A synthase;Tbxas1;ortholog
MOUSE|MGI=MGI=87947|UniProtKB=P28650	Adssl1	Adenylosuccinate synthetase isozyme 1;Adssl1;ortholog
MOUSE|MGI=MGI=1913666|UniProtKB=Q9Z1P6	Ndufa7	NADH dehydrogenase [ubiquinone] 1 alpha subcomplex subunit 7;Ndufa7;ortholog
MOUSE|MGI=MGI=2444664|UniProtKB=Q8BGT9	Galnt12	Polypeptide N-acetylgalactosaminyltransferase 12;Galnt12;ortholog
MOUSE|MGI=MGI=87999|UniProtKB=P48999	Alox5	Arachidonate 5-lipoxygenase;Alox5;ortholog
MOUSE|MGI=MGI=1343103|UniProtKB=Q9CQ75	Ndufa2	NADH dehydrogenase [ubiquinone] 1 alpha subcomplex subunit 2;Ndufa2;ortholog
MOUSE|MGI=MGI=96158|UniProtKB=P38060	Hmgcl	Hydroxymethylglutaryl-CoA lyase, mitochondrial;Hmgcl;ortholog
MOUSE|MGI=MGI=1351662|UniProtKB=Q8VC28	Akr1c13	Aldo-keto reductase family 1 member C13;Akr1c13;ortholog
MOUSE|MGI=MGI=2442264|UniProtKB=P58044	Idi1	Isopentenyl-diphosphate Delta-isomerase 1;Idi1;ortholog
MOUSE|MGI=MGI=2142292|UniProtKB=Q7TPM9	Mtmr10	Myotubularin-related protein 10;Mtmr10;ortholog
MOUSE|MGI=MGI=1890404|UniProtKB=Q9EPB5	Serhl	Serine hydrolase-like protein;Serhl;ortholog
MOUSE|MGI=MGI=1915050|UniProtKB=Q9DCV3	Dgat2	Diacylglycerol O-acyltransferase 2;Dgat2;ortholog
MOUSE|MGI=MGI=97526|UniProtKB=P09174	Pde6g	Retinal rod rhodopsin-sensitive cGMP 3',5'-cyclic phosphodiesterase subunit gamma;Pde6g;ortholog
MOUSE|MGI=MGI=1913484|UniProtKB=Q9CRA4	Msmo1	Methylsterol monooxygenase 1;Msmo1;ortholog
MOUSE|MGI=MGI=1913994|UniProtKB=Q8C6E0	Cfap36	Cilia- and flagella-associated protein 36;Cfap36;ortholog
MOUSE|MGI=MGI=1920974|UniProtKB=Q9D1I5	Mcee	Methylmalonyl-CoA epimerase, mitochondrial;Mcee;ortholog
MOUSE|MGI=MGI=98763|UniProtKB=P04184	Tk1	Thymidine kinase, cytosolic;Tk1;ortholog
MOUSE|MGI=MGI=1099443|UniProtKB=O55239	Nnmt	Nicotinamide N-methyltransferase;Nnmt;ortholog
MOUSE|MGI=MGI=2686925|UniProtKB=Q6P1H1	Cyb561a3	Cytochrome b ascorbate-dependent protein 3;Cyb561a3;ortholog
MOUSE|MGI=MGI=95492|UniProtKB=Q9QXD6	Fbp1	Fructose-1,6-bisphosphatase 1;Fbp1;ortholog
MOUSE|MGI=MGI=1347001|UniProtKB=Q8CIF4	Btd	Biotinidase;Btd;ortholog
MOUSE|MGI=MGI=1915921|UniProtKB=Q922E4	Pcyt2	Ethanolamine-phosphate cytidylyltransferase;Pcyt2;ortholog
MOUSE|MGI=MGI=97043|UniProtKB=P06801	Me1	NADP-dependent malic enzyme;Me1;ortholog
MOUSE|MGI=MGI=97798|UniProtKB=Q05769	Ptgs2	Prostaglandin G/H synthase 2;Ptgs2;ortholog
MOUSE|MGI=MGI=98881|UniProtKB=P07147	Tyrp1	5,6-dihydroxyindole-2-carboxylic acid oxidase;Tyrp1;ortholog
MOUSE|MGI=MGI=98852|UniProtKB=P52196	Tst	Thiosulfate sulfurtransferase;Tst;ortholog
MOUSE|MGI=MGI=99500|UniProtKB=P34914	Ephx2	Bifunctional epoxide hydrolase 2;Ephx2;ortholog
MOUSE|MGI=MGI=1349389|UniProtKB=O88986	Gcat	2-amino-3-ketobutyrate coenzyme A ligase, mitochondrial;Gcat;ortholog
MOUSE|MGI=MGI=98181|UniProtKB=P11157	Rrm2	Ribonucleoside-diphosphate reductase subunit M2;Rrm2;ortholog
MOUSE|MGI=MGI=2144929|UniProtKB=Q99JT9	Adi1	1,2-dihydroxy-3-keto-5-methylthiopentene dioxygenase;Adi1;ortholog
MOUSE|MGI=MGI=1341098|UniProtKB=Q91Z98	Chil4	Chitinase-like protein 4;Chil4;ortholog
MOUSE|MGI=MGI=3589109|UniProtKB=Q810K3	Sgpp2	Sphingosine-1-phosphate phosphatase 2;Sgpp2;ortholog
MOUSE|MGI=MGI=1915120|UniProtKB=Q8BGB7	Enoph1	Enolase-phosphatase E1;Enoph1;ortholog
MOUSE|MGI=MGI=1916372|UniProtKB=Q8VDQ1	Ptgr2	Prostaglandin reductase 2;Ptgr2;ortholog
MOUSE|MGI=MGI=99523|UniProtKB=P35700	Prdx1	Peroxiredoxin-1;Prdx1;ortholog
MOUSE|MGI=MGI=2183149|UniProtKB=P58058	Nadk	NAD kinase;Nadk;ortholog
MOUSE|MGI=MGI=2149728|UniProtKB=Q91UZ5	Impa2	Inositol monophosphatase 2;Impa2;ortholog
MOUSE|MGI=MGI=2449143|UniProtKB=Q8VI38	Gbgt1	Globoside alpha-1,3-N-acetylgalactosaminyltransferase 1;Gbgt1;ortholog
MOUSE|MGI=MGI=106098|UniProtKB=Q9DCW4	Etfb	Electron transfer flavoprotein subunit beta;Etfb;ortholog
MOUSE|MGI=MGI=2158641|UniProtKB=Q99N19	Cyp4f13	Cytochrome P450 CYP4F13;Cyp4f13;ortholog
MOUSE|MGI=MGI=1333114|UniProtKB=Q9QYT7	Pigq	Phosphatidylinositol N-acetylglucosaminyltransferase subunit Q;Pigq;ortholog
MOUSE|MGI=MGI=104767|UniProtKB=O70325	Gpx4	Phospholipid hydroperoxide glutathione peroxidase;Gpx4;ortholog
MOUSE|MGI=MGI=96073|UniProtKB=P29416	Hexa	Beta-hexosaminidase subunit alpha;Hexa;ortholog
MOUSE|MGI=MGI=1923488|UniProtKB=Q91Z53	Grhpr	Glyoxylate reductase/hydroxypyruvate reductase;Grhpr;ortholog
MOUSE|MGI=MGI=1913321|UniProtKB=Q9DCM0	Ethe1	Persulfide dioxygenase ETHE1, mitochondrial;Ethe1;ortholog
MOUSE|MGI=MGI=107807|UniProtKB=Q9CQ69	Uqcrq	Cytochrome b-c1 complex subunit 8;Uqcrq;ortholog
MOUSE|MGI=MGI=2445171|UniProtKB=Q8BGN3	Enpp6	Ectonucleotide pyrophosphatase/phosphodiesterase family member 6;Enpp6;ortholog
MOUSE|MGI=MGI=1926002|UniProtKB=Q8C1F4	Csgalnact2	Chondroitin sulfate N-acetylgalactosaminyltransferase 2;Csgalnact2;ortholog
MOUSE|MGI=MGI=1889505|UniProtKB=Q9Z222	B3gnt2	N-acetyllactosaminide beta-1,3-N-acetylglucosaminyltransferase 2;B3GNT2;ortholog
MOUSE|MGI=MGI=2443978|UniProtKB=Q8JZV7	Naga	N-acetylglucosamine-6-phosphate deacetylase;Amdhd2;ortholog
MOUSE|MGI=MGI=1917786|UniProtKB=Q9CYK2	Qpct	Glutaminyl-peptide cyclotransferase;Qpct;ortholog
MOUSE|MGI=MGI=95513|UniProtKB=P22315	Fech	Ferrochelatase, mitochondrial;Fech;ortholog
MOUSE|MGI=MGI=99830|UniProtKB=Q3U5Q7	Cmpk2	UMP-CMP kinase 2, mitochondrial;Cmpk2;ortholog
MOUSE|MGI=MGI=105959|UniProtKB=Q64445	Cox8a	Cytochrome c oxidase subunit 8A, mitochondrial;Cox8a;ortholog
MOUSE|MGI=MGI=2385656|UniProtKB=Q99PU5	Acsbg1	Long-chain-fatty-acid--CoA ligase ACSBG1;Acsbg1;ortholog
MOUSE|MGI=MGI=2177469|UniProtKB=Q99NF1	Bco2	Beta,beta-carotene 9',10'-oxygenase;Bco2;ortholog
MOUSE|MGI=MGI=106428|UniProtKB=Q7TNG8	Ldhd	Probable D-lactate dehydrogenase, mitochondrial;Ldhd;ortholog
MOUSE|MGI=MGI=1929064|UniProtKB=Q99LL3	Chst12	Carbohydrate sulfotransferase 12;Chst12;ortholog
MOUSE|MGI=MGI=98400|UniProtKB=Q68FF9	Srd5a1	3-oxo-5-alpha-steroid 4-dehydrogenase 1;Srd5a1;ortholog
MOUSE|MGI=MGI=1329033|UniProtKB=O35423	Agt	Serine--pyruvate aminotransferase, mitochondrial;Agxt;ortholog
MOUSE|MGI=MGI=95593|UniProtKB=Q99LJ1	Fuca1	Tissue alpha-L-fucosidase;Fuca1;ortholog
MOUSE|MGI=MGI=2686228|UniProtKB=Q6IE26	Ephx4	Epoxide hydrolase 4;Ephx4;ortholog
MOUSE|MGI=MGI=3603816|UniProtKB=Q8C0N2	Gpat3	Glycerol-3-phosphate acyltransferase 3;Gpat3;ortholog
MOUSE|MGI=MGI=1921809|UniProtKB=Q9D2Y9	Elovl7	Elongation of very long chain fatty acids protein 7;Elovl7;ortholog
MOUSE|MGI=MGI=1346042|UniProtKB=O35678	Mgll	Monoglyceride lipase;Mgll;ortholog
MOUSE|MGI=MGI=96074|UniProtKB=P20060	Hexb	Beta-hexosaminidase subunit beta;Hexb;ortholog
MOUSE|MGI=MGI=2448516|UniProtKB=Q3UNZ8	Cryzl2	Quinone oxidoreductase-like protein 2;Cryzl2;ortholog
MOUSE|MGI=MGI=1098623|UniProtKB=Q8BWT1	Acaa2	3-ketoacyl-CoA thiolase, mitochondrial;Acaa2;ortholog
MOUSE|MGI=MGI=1338800|UniProtKB=Q9Z0S1	Bpnt1	3'(2'),5'-bisphosphate nucleotidase 1;Bpnt1;ortholog
MOUSE|MGI=MGI=106025|UniProtKB=Q6TL19	Gucy2g	Guanylate cyclase 2G;Gucy2g;ortholog
MOUSE|MGI=MGI=1923363|UniProtKB=Q5SW46	Lpo	Lactoperoxidase;Lpo;ortholog
MOUSE|MGI=MGI=102768|UniProtKB=P21956	Mfge8	Lactadherin;Mfge8;ortholog
MOUSE|MGI=MGI=1913762|UniProtKB=Q91YP3	Dera	Deoxyribose-phosphate aldolase;Dera;ortholog
MOUSE|MGI=MGI=1916051|UniProtKB=Q8BHI7	Elovl5	Elongation of very long chain fatty acids protein 5;Elovl5;ortholog
MOUSE|MGI=MGI=1921435|UniProtKB=Q9D6Y9	Gbe1	1,4-alpha-glucan-branching enzyme;Gbe1;ortholog
MOUSE|MGI=MGI=1351614|UniProtKB=Q9R062	Gyg	Glycogenin-1;Gyg1;ortholog
MOUSE|MGI=MGI=1349919|UniProtKB=O09111	Ndufb11	NADH dehydrogenase [ubiquinone] 1 beta subcomplex subunit 11, mitochondrial;Ndufb11;ortholog
MOUSE|MGI=MGI=102797|UniProtKB=P41216	Acsl1	Long-chain-fatty-acid--CoA ligase 1;Acsl1;ortholog
MOUSE|MGI=MGI=1339962|UniProtKB=Q91XD4	Ftcd	Formimidoyltransferase-cyclodeaminase;Ftcd;ortholog
MOUSE|MGI=MGI=97836|UniProtKB=Q8BVI4	Qdpr	Dihydropteridine reductase;Qdpr;ortholog
MOUSE|MGI=MGI=2138232|UniProtKB=Q6NVG7	Colgalt2	Procollagen galactosyltransferase 2;Colgalt2;ortholog
MOUSE|MGI=MGI=3039603|UniProtKB=Q3USF0	B3gnt6	Acetylgalactosaminyl-O-glycosyl-glycoprotein beta-1,3-N-acetylglucosaminyltransferase;B3gnt6;ortholog
MOUSE|MGI=MGI=107372|UniProtKB=Q60866	Pter	Phosphotriesterase-related protein;Pter;ortholog
MOUSE|MGI=MGI=102952|UniProtKB=O88673	Dgka	Diacylglycerol kinase alpha;Dgka;ortholog
MOUSE|MGI=MGI=1920296|UniProtKB=Q80Y14	Glrx5	Glutaredoxin-related protein 5, mitochondrial;Glrx5;ortholog
MOUSE|MGI=MGI=3027002|UniProtKB=Q8BZH1	Tgm4	Protein-glutamine gamma-glutamyltransferase 4;Tgm4;ortholog
MOUSE|MGI=MGI=1330587|UniProtKB=Q60967	Papss1	Bifunctional 3'-phosphoadenosine 5'-phosphosulfate synthase 1;Papss1;ortholog
MOUSE|MGI=MGI=1914353|UniProtKB=Q91YR9	Ptgr1	Prostaglandin reductase 1;Ptgr1;ortholog
MOUSE|MGI=MGI=1095413|UniProtKB=O09010	Lfng	Beta-1,3-N-acetylglucosaminyltransferase lunatic fringe;Lfng;ortholog
MOUSE|MGI=MGI=1309516|UniProtKB=O88856	Tpst2	Protein-tyrosine sulfotransferase 2;Tpst2;ortholog
MOUSE|MGI=MGI=1922822|UniProtKB=P56375	Acyp2	Acylphosphatase-2;Acyp2;ortholog
MOUSE|MGI=MGI=1915988|UniProtKB=Q99NB1	Acss1	Acetyl-coenzyme A synthetase 2-like, mitochondrial;Acss1;ortholog
MOUSE|MGI=MGI=87916|UniProtKB=P03958	Ada	Adenosine deaminase;Ada;ortholog
MOUSE|MGI=MGI=103099|UniProtKB=P43024	Cox6a1	Cytochrome c oxidase subunit 6A1, mitochondrial;Cox6a1;ortholog
MOUSE|MGI=MGI=105386|UniProtKB=P53395	Dbt	Lipoamide acyltransferase component of branched-chain alpha-keto acid dehydrogenase complex, mitochondrial;Dbt;ortholog
MOUSE|MGI=MGI=1355330|UniProtKB=Q61753	Phgdh	D-3-phosphoglycerate dehydrogenase;Phgdh;ortholog
MOUSE|MGI=MGI=96789|UniProtKB=Q9Z0M5	Lipa	Lysosomal acid lipase/cholesteryl ester hydrolase;Lipa;ortholog
MOUSE|MGI=MGI=87979|UniProtKB=Q9WUR9	Ak4	Adenylate kinase 4, mitochondrial;Ak4;ortholog
MOUSE|MGI=MGI=104995|UniProtKB=O09172	Gclm	Glutamate--cysteine ligase regulatory subunit;Gclm;ortholog
MOUSE|MGI=MGI=107932|UniProtKB=P52503	Ndufs6	NADH dehydrogenase [ubiquinone] iron-sulfur protein 6, mitochondrial;Ndufs6;ortholog
MOUSE|MGI=MGI=1098296|UniProtKB=P97742	Cpt1a	Carnitine O-palmitoyltransferase 1, liver isoform;Cpt1a;ortholog
MOUSE|MGI=MGI=95675|UniProtKB=Q05915	Gch1	GTP cyclohydrolase 1;Gch1;ortholog
MOUSE|MGI=MGI=88437|UniProtKB=P16330	Cnp	2',3'-cyclic-nucleotide 3'-phosphodiesterase;Cnp;ortholog
MOUSE|MGI=MGI=1929511|UniProtKB=O35683	Ndufa1	NADH dehydrogenase [ubiquinone] 1 alpha subcomplex subunit 1;Ndufa1;ortholog
MOUSE|MGI=MGI=99907|UniProtKB=Q9R0E2	Plod1	Procollagen-lysine,2-oxoglutarate 5-dioxygenase 1;Plod1;ortholog
MOUSE|MGI=MGI=1915444|UniProtKB=Q9CQC7	Ndufb4	NADH dehydrogenase [ubiquinone] 1 beta subcomplex subunit 4;Ndufb4;ortholog
MOUSE|MGI=MGI=1333825|UniProtKB=Q9Z2A7	Dgat1	Diacylglycerol O-acyltransferase 1;Dgat1;ortholog
MOUSE|MGI=MGI=2136878|UniProtKB=Q9JI67	B3galt5	Beta-1,3-galactosyltransferase 5;B3galt5;ortholog
MOUSE|MGI=MGI=1858208|UniProtKB=O35459	Ech1	Delta(3,5)-Delta(2,4)-dienoyl-CoA isomerase, mitochondrial;Ech1;ortholog
MOUSE|MGI=MGI=2447348|UniProtKB=Q8R2H9	Phospho1	Phosphoethanolamine/phosphocholine phosphatase;Phospho1;ortholog
MOUSE|MGI=MGI=1889802|UniProtKB=Q99L13	Hibadh	3-hydroxyisobutyrate dehydrogenase, mitochondrial;Hibadh;ortholog
MOUSE|MGI=MGI=1860776|UniProtKB=Q8BJ64	Chdh	Choline dehydrogenase, mitochondrial;Chdh;ortholog
MOUSE|MGI=MGI=1914325|UniProtKB=Q9CQY5	Magt1	Magnesium transporter protein 1;Magt1;ortholog
MOUSE|MGI=MGI=1298231|UniProtKB=O70281	Tpst1	Protein-tyrosine sulfotransferase 1;Tpst1;ortholog
MOUSE|MGI=MGI=94871|UniProtKB=P42125	Eci1	Enoyl-CoA delta isomerase 1, mitochondrial;Eci1;ortholog
MOUSE|MGI=MGI=1913736|UniProtKB=Q8VHQ9	Acot11	Acyl-coenzyme A thioesterase 11;Acot11;ortholog
MOUSE|MGI=MGI=1310004|UniProtKB=P97872	Fmo5	Dimethylaniline monooxygenase [N-oxide-forming] 5;Fmo5;ortholog
MOUSE|MGI=MGI=1914778|UniProtKB=Q99P30	Nudt7	Peroxisomal coenzyme A diphosphatase NUDT7;Nudt7;ortholog
MOUSE|MGI=MGI=2445356|UniProtKB=Q99K82	Smox	Spermine oxidase;Smox;ortholog
MOUSE|MGI=MGI=1919812|UniProtKB=Q9CZL5	Pcbd2	Pterin-4-alpha-carbinolamine dehydratase 2;Pcbd2;ortholog
MOUSE|MGI=MGI=104535|UniProtKB=Q61907	Pemt	Phosphatidylethanolamine N-methyltransferase;Pemt;ortholog
MOUSE|MGI=MGI=1298206|UniProtKB=O70172	Pip4k2a	Phosphatidylinositol 5-phosphate 4-kinase type-2 alpha;Pip4k2a;ortholog
MOUSE|MGI=MGI=95491|UniProtKB=P70695	Fbp2	Fructose-1,6-bisphosphatase isozyme 2;Fbp2;ortholog
MOUSE|MGI=MGI=103181|UniProtKB=O09164	Sod3	Extracellular superoxide dismutase [Cu-Zn];Sod3;ortholog
MOUSE|MGI=MGI=2388029|UniProtKB=Q8CIV3	Liph	Lipase member H;Liph;ortholog
MOUSE|MGI=MGI=1195256|UniProtKB=P47713	Pla2g4a	Cytosolic phospholipase A2;Pla2g4a;ortholog
MOUSE|MGI=MGI=99778|UniProtKB=Q64521	Gpd2	Glycerol-3-phosphate dehydrogenase, mitochondrial;Gpd2;ortholog
MOUSE|MGI=MGI=99782|UniProtKB=Q61503	Nt5e	5'-nucleotidase;Nt5e;ortholog
MOUSE|MGI=MGI=95679|UniProtKB=P13707	Gpd1	Glycerol-3-phosphate dehydrogenase [NAD(+)], cytoplasmic;Gpd1;ortholog
MOUSE|MGI=MGI=105979|UniProtKB=Q00612	G6pdx	Glucose-6-phosphate 1-dehydrogenase X;G6pdx;ortholog
MOUSE|MGI=MGI=1277169|UniProtKB=Q9D9V3	Echdc1	Ethylmalonyl-CoA decarboxylase;Echdc1;ortholog
MOUSE|MGI=MGI=88170|UniProtKB=Q9CY64	Blvra	Biliverdin reductase A;Blvra;ortholog
MOUSE|MGI=MGI=104665|UniProtKB=Q61263	Soat1	Sterol O-acyltransferase 1;Soat1;ortholog
MOUSE|MGI=MGI=106442|UniProtKB=Q9CRC0	Vkorc1	Vitamin K epoxide reductase complex subunit 1;Vkorc1;ortholog
MOUSE|MGI=MGI=1913468|UniProtKB=Q9CQJ8	Ndufb9	NADH dehydrogenase [ubiquinone] 1 beta subcomplex subunit 9;Ndufb9;ortholog
MOUSE|MGI=MGI=2136381|UniProtKB=Q99JY0	Hadhb	Trifunctional enzyme subunit beta, mitochondrial;Hadhb;ortholog
MOUSE|MGI=MGI=1924237|UniProtKB=Q3UGR5	Hdhd2	Haloacid dehalogenase-like hydrolase domain-containing protein 2;Hdhd2;ortholog
MOUSE|MGI=MGI=1919133|UniProtKB=Q66JT7	Coq2	4-hydroxybenzoate polyprenyltransferase, mitochondrial;Coq2;ortholog
MOUSE|MGI=MGI=1915230|UniProtKB=Q9CRC9	Gnpda2	Glucosamine-6-phosphate isomerase 2;Gnpda2;ortholog
MOUSE|MGI=MGI=2387184|UniProtKB=Q8BH98	Mboat1	Lysophospholipid acyltransferase 1;Mboat1;ortholog
MOUSE|MGI=MGI=1915111|UniProtKB=G5E895	Akr1b10	Aldo-keto reductase family 1, member B10 (aldose reductase);Akr1b10;ortholog
MOUSE|MGI=MGI=1922656|UniProtKB=Q9DC70	Ndufs7	NADH dehydrogenase [ubiquinone] iron-sulfur protein 7, mitochondrial;Ndufs7;ortholog
MOUSE|MGI=MGI=1858959|UniProtKB=Q9JLJ5	Elovl1	Elongation of very long chain fatty acids protein 1;Elovl1;ortholog
MOUSE|MGI=MGI=1924018|UniProtKB=F8VPQ6	Alpi	Alkaline phosphatase;Alpi;ortholog
MOUSE|MGI=MGI=102502|UniProtKB=P00416	mt-Co3	Cytochrome c oxidase subunit 3;mt-Co3;ortholog
MOUSE|MGI=MGI=88070|UniProtKB=Q61176	Arg1	Arginase-1;Arg1;ortholog
MOUSE|MGI=MGI=105940|UniProtKB=P82343	Renbp	N-acylglucosamine 2-epimerase;Renbp;ortholog
MOUSE|MGI=MGI=107929|UniProtKB=P70182	Pip5k1b	Phosphatidylinositol 4-phosphate 5-kinase type-1 alpha;Pip5k1a;ortholog
MOUSE|MGI=MGI=1913779|UniProtKB=Q8BW00	Pth	Probable peptidyl-tRNA hydrolase;Ptrh1;ortholog
MOUSE|MGI=MGI=2142841|UniProtKB=Q8VI16	B3gnt9	UDP-GlcNAc:betaGal beta-1,3-N-acetylglucosaminyltransferase 9;B3gnt9;ortholog
MOUSE|MGI=MGI=1353611|UniProtKB=O88822	Sc5d	Lathosterol oxidase;Sc5d;ortholog
MOUSE|MGI=MGI=2384301|UniProtKB=Q8R1C6	Mettl22	Methyltransferase-like protein 22;Mettl22;ortholog
MOUSE|MGI=MGI=1353418|UniProtKB=O35621	Pmm1	Phosphomannomutase 1;Pmm1;ortholog
MOUSE|MGI=MGI=1918993|UniProtKB=Q9DBL7	Coasy	Bifunctional coenzyme A synthase;Coasy;ortholog
MOUSE|MGI=MGI=1917351|UniProtKB=Q99N17	Cyp4f16	Cytochrome P450 CYP4F16;Cyp4f16;ortholog
MOUSE|MGI=MGI=103078|UniProtKB=Q64105	Spr	Sepiapterin reductase;Spr;ortholog
MOUSE|MGI=MGI=95804|UniProtKB=P47791	Gsr	Glutathione reductase, mitochondrial;Gsr;ortholog
MOUSE|MGI=MGI=102503|UniProtKB=P00405	mt-Co2	Cytochrome c oxidase subunit 2;Mtco2;ortholog
MOUSE|MGI=MGI=96915|UniProtKB=Q64133	Maoa	Amine oxidase [flavin-containing] A;Maoa;ortholog
MOUSE|MGI=MGI=1928893|UniProtKB=P97353	Fut10	Galactoside 2-alpha-L-fucosyltransferase 3;Sec1;ortholog
MOUSE|MGI=MGI=2138281|UniProtKB=Q3U9G9	Lbr	Delta(14)-sterol reductase;Lbr;ortholog
MOUSE|MGI=MGI=1917233|UniProtKB=F8VQM5	Sis	Sucrase isomaltase (alpha-glucosidase);Sis;ortholog
MOUSE|MGI=MGI=105060|UniProtKB=Q91WG7	Dgkg	Diacylglycerol kinase gamma;Dgkg;ortholog
MOUSE|MGI=MGI=1914328|UniProtKB=Q8CHP8	Pgp	Glycerol-3-phosphate phosphatase;Pgp;ortholog
Protein modifying enzyme (PC00260)
MOUSE|MGI=MGI=2384877|UniProtKB=Q8VCA5	Tmprss4	Transmembrane protease serine 4;Tmprss4;ortholog
MOUSE|MGI=MGI=1925560|UniProtKB=Q8BWE1	1810024B03Rik	RIKEN cDNA 1810024B03 gene;1810024B03Rik;ortholog
MOUSE|MGI=MGI=1341799|UniProtKB=Q62433	Ndrg1	Protein NDRG1;Ndrg1;ortholog
MOUSE|MGI=MGI=892019|UniProtKB=P00755	Klk1	Kallikrein 1-related peptidase b1;Klk1b1;ortholog
MOUSE|MGI=MGI=1933407|UniProtKB=Q9ER04	Tmprss5	Transmembrane protease serine 5;Tmprss5;ortholog
MOUSE|MGI=MGI=1100859|UniProtKB=O08688	Capn5	Calpain-5;Capn5;ortholog
MOUSE|MGI=MGI=1891190|UniProtKB=Q9WUU7	Ctsz	Cathepsin Z;Ctsz;ortholog
MOUSE|MGI=MGI=97813|UniProtKB=P49446	Ptpre	Receptor-type tyrosine-protein phosphatase epsilon;Ptpre;ortholog
MOUSE|MGI=MGI=96941|UniProtKB=P21844	Cma1	Chymase;Cma1;ortholog
MOUSE|MGI=MGI=2445027|UniProtKB=Q2TBA3	Malt1	Mucosa-associated lymphoid tissue lymphoma translocation protein 1 homolog;Malt1;ortholog
MOUSE|MGI=MGI=1916269|UniProtKB=Q9D958	Spcs1	Signal peptidase complex subunit 1;Spcs1;ortholog
MOUSE|MGI=MGI=97579|UniProtKB=P07934	Phkg1	Phosphorylase b kinase gamma catalytic chain, skeletal muscle/heart isoform;Phkg1;ortholog
MOUSE|MGI=MGI=102850|UniProtKB=P15947	Klk1,Klk6	Kallikrein-1;Klk1;ortholog
MOUSE|MGI=MGI=104873|UniProtKB=Q64191	Aga	N(4)-(beta-N-acetylglucosaminyl)-L-asparaginase;Aga;ortholog
MOUSE|MGI=MGI=1339949|UniProtKB=Q8BNJ2	Adamts4	A disintegrin and metalloproteinase with thrombospondin motifs 4;Adamts4;ortholog
MOUSE|MGI=MGI=107823|UniProtKB=P55097	Ctsk	Cathepsin K;Ctsk;ortholog
MOUSE|MGI=MGI=109249|UniProtKB=P97857	Adamts1	A disintegrin and metalloproteinase with thrombospondin motifs 1;Adamts1;ortholog
MOUSE|MGI=MGI=1913406|UniProtKB=Q9CPX9	Anapc11	Anaphase-promoting complex subunit 11;Anapc11;ortholog
MOUSE|MGI=MGI=104328|UniProtKB=Q6PIX5	Rhbdf1	Inactive rhomboid protein 1;Rhbdf1;ortholog
MOUSE|MGI=MGI=88561|UniProtKB=P10605	Ctsb	Cathepsin B;Ctsb;ortholog
MOUSE|MGI=MGI=1343166|UniProtKB=Q91Y82	Klk6	Kallikrein 6, isoform CRA_a;Klk6;ortholog
MOUSE|MGI=MGI=1933403|UniProtKB=Q9EQH2	Erap1	Endoplasmic reticulum aminopeptidase 1;Erap1;ortholog
MOUSE|MGI=MGI=97601|UniProtKB=Q02111	Prkcq	Protein kinase C theta type;Prkcq;ortholog
MOUSE|MGI=MGI=1340062|UniProtKB=Q9WVC6	Sgk1	Serine/threonine-protein kinase Sgk1;Sgk1;ortholog
MOUSE|MGI=MGI=1916193|UniProtKB=Q99MQ3	Pink1	Serine/threonine-protein kinase PINK1, mitochondrial;Pink1;ortholog
MOUSE|MGI=MGI=1354381|UniProtKB=Q9JIQ8	Tmprss2	Transmembrane protease serine 2;Tmprss2;ortholog
MOUSE|MGI=MGI=3693832|UniProtKB=Q64362	Aktip	AKT-interacting protein;Aktip;ortholog
MOUSE|MGI=MGI=107285|UniProtKB=P49935	Ctsh	Pro-cathepsin H;Ctsh;ortholog
MOUSE|MGI=MGI=1915091|UniProtKB=Q9CPX6	Atg3	Ubiquitin-like-conjugating enzyme ATG3;Atg3;ortholog
MOUSE|MGI=MGI=1344364|UniProtKB=Q9WTV6	Usp18	Ubl carboxyl-terminal hydrolase 18;Usp18;ortholog
MOUSE|MGI=MGI=1914361|UniProtKB=Q9D7V9	Naaa	N-acylethanolamine-hydrolyzing acid amidase;Naaa;ortholog
MOUSE|MGI=MGI=1891338|UniProtKB=Q9Z0G2	Srpk3	SRSF protein kinase 3;Srpk3;ortholog
MOUSE|MGI=MGI=1920897|UniProtKB=Q9D805	Capn9	Calpain-9;Capn9;ortholog
MOUSE|MGI=MGI=1860076|UniProtKB=O35445	Rnf5	E3 ubiquitin-protein ligase RNF5;Rnf5;ortholog
MOUSE|MGI=MGI=106645|UniProtKB=P16406	Enpep	Glutamyl aminopeptidase;Enpep;ortholog
MOUSE|MGI=MGI=97518|UniProtKB=Q04899	Cdk18	Cyclin-dependent kinase 18;Cdk18;ortholog
MOUSE|MGI=MGI=1277152|UniProtKB=Q5XJY4	Parl	Presenilins-associated rhomboid-like protein, mitochondrial;Parl;ortholog
MOUSE|MGI=MGI=2448523|UniProtKB=Q6NSR8	Npepl1	Probable aminopeptidase NPEPL1;Npepl1;ortholog
MOUSE|MGI=MGI=1921867|UniProtKB=Q920A5	Scpep1	Retinoid-inducible serine carboxypeptidase;Scpep1;ortholog
MOUSE|MGI=MGI=894678|UniProtKB=P97477	Aurka	Aurora kinase A;Aurka;ortholog
MOUSE|MGI=MGI=3645218|UniProtKB=Q3TL54	Trim43a	Tripartite motif-containing protein 43A;Trim43a;ortholog
MOUSE|MGI=MGI=1913536|UniProtKB=Q9D8V7	Sec11c	Signal peptidase complex catalytic subunit SEC11C;Sec11c;ortholog
MOUSE|MGI=MGI=88555|UniProtKB=P12400	Ctla2b	Protein CTLA-2-beta;Ctla2b;ortholog
MOUSE|MGI=MGI=88563|UniProtKB=P28293	Ctsg	Cathepsin G;Ctsg;ortholog
MOUSE|MGI=MGI=1890476|UniProtKB=Q9QXK2	Rad18	E3 ubiquitin-protein ligase RAD18;Rad18;ortholog
MOUSE|MGI=MGI=2384986|UniProtKB=Q8BKD6	Rnf144b	E3 ubiquitin-protein ligase RNF144B;Rnf144b;ortholog
MOUSE|MGI=MGI=2137617|UniProtKB=Q99JR5	Arg1	Tubulointerstitial nephritis antigen-like;Tinagl1;ortholog
MOUSE|MGI=MGI=1921615|UniProtKB=Q9D4H7	Lonrf3	LON peptidase N-terminal domain and RING finger protein 3;Lonrf3;ortholog
MOUSE|MGI=MGI=106313|UniProtKB=Q9CQT7	Desi1	Desumoylating isopeptidase 1;Desi1;ortholog
MOUSE|MGI=MGI=2143163|UniProtKB=Q3UMW7	Mapk3	MAP kinase-activated protein kinase 3;Mapkapk3;ortholog
MOUSE|MGI=MGI=1346336|UniProtKB=Q91VE3	Klk7	Kallikrein-7;Klk7;ortholog
MOUSE|MGI=MGI=2443938|UniProtKB=Q3U435	Mmp25	Matrix metalloproteinase-25;Mmp25;ortholog
MOUSE|MGI=MGI=1917172|UniProtKB=Q8BN21	Vrk2	Serine/threonine-protein kinase VRK2;Vrk2;ortholog
MOUSE|MGI=MGI=1355297|UniProtKB=P58750	Pim3	Serine/threonine-protein kinase pim-3;Pim3;ortholog
MOUSE|MGI=MGI=1890508|UniProtKB=Q80W54	Zmpste24	CAAX prenyl protease 1 homolog;Zmpste24;ortholog
MOUSE|MGI=MGI=97610|UniProtKB=P11214	Plat	Tissue-type plasminogen activator;Plat;ortholog
MOUSE|MGI=MGI=1924117|UniProtKB=Q8BHC7	Rhbdd1	Rhomboid-related protein 4;Rhbdd1;ortholog
MOUSE|MGI=MGI=1913874|UniProtKB=Q9CYN2	Spc25	Signal peptidase complex subunit 2;Spcs2;ortholog
MOUSE|MGI=MGI=1353655|UniProtKB=P57080	Usp25	Ubiquitin carboxyl-terminal hydrolase 25;Usp25;ortholog
MOUSE|MGI=MGI=2429944|UniProtKB=Q8CJC5	Neurl3	E3 ubiquitin-protein ligase NEURL3;Neurl3;ortholog
MOUSE|MGI=MGI=1917258|UniProtKB=Q8R0I0	Ace2	Angiotensin-converting enzyme 2;Ace2;ortholog
MOUSE|MGI=MGI=109284|UniProtKB=Q61144	Psen2	Presenilin-2;Psen2;ortholog
MOUSE|MGI=MGI=1196620|UniProtKB=O35453	Hpn	Serine protease hepsin;Hpn;ortholog
MOUSE|MGI=MGI=1338045|UniProtKB=P56203	Ctsw	Cathepsin W;Ctsw;ortholog
MOUSE|MGI=MGI=1343087|UniProtKB=Q9JK42	Pdk2	[Pyruvate dehydrogenase (acetyl-transferring)] kinase isozyme 2, mitochondrial;Pdk2;ortholog
MOUSE|MGI=MGI=1353645|UniProtKB=Q9QYZ9	Prss30	Serine protease 30;Prss30;ortholog
MOUSE|MGI=MGI=2182465|UniProtKB=Q8K3G5	Vrk3	Inactive serine/threonine-protein kinase VRK3;Vrk3;ortholog
MOUSE|MGI=MGI=1100510|UniProtKB=O08901	Bub1	Mitotic checkpoint serine/threonine-protein kinase BUB1;Bub1;ortholog
MOUSE|MGI=MGI=4821264|UniProtKB=J3QNR8	Trim34b	Tripartite motif-containing 34B;Trim34b;ortholog
MOUSE|MGI=MGI=1917650|UniProtKB=Q9R0X2	Adamdec1	ADAM DEC1;Adamdec1;ortholog
MOUSE|MGI=MGI=2654703|UniProtKB=B2RUR8	Otud7b	OTU domain-containing protein 7B;Otud7b;ortholog
MOUSE|MGI=MGI=97748|UniProtKB=P16675	Ctsa	Lysosomal protective protein;Ctsa;ortholog
MOUSE|MGI=MGI=1352498|UniProtKB=Q9QYG0	Ndrg2	Protein NDRG2;Ndrg2;ortholog
MOUSE|MGI=MGI=1923931|UniProtKB=Q99PQ1	Trim12a	Tripartite motif-containing protein 12A;Trim12a;ortholog
MOUSE|MGI=MGI=2139628|UniProtKB=Q8BM88	Ctso	Cathepsin O;Ctso;ortholog
MOUSE|MGI=MGI=1330838|UniProtKB=O89017	Lgmn	Legumain;Lgmn;ortholog
MOUSE|MGI=MGI=1925808|UniProtKB=Q9D236	Htra3	Serine protease HTRA3;Htra3;ortholog
MOUSE|MGI=MGI=107341|UniProtKB=O70370	Ctss	Cathepsin S;Ctss;ortholog
MOUSE|MGI=MGI=2444800|UniProtKB=Q8C0F9	Prss35	Inactive serine protease 35;Prss35;ortholog
MOUSE|MGI=MGI=102897|UniProtKB=F6XJP7	Pcsk6	Proprotein convertase subtilisin/kexin type 6;Pcsk6;ortholog
MOUSE|MGI=MGI=1931465|UniProtKB=Q9EPB4	Pycard	Apoptosis-associated speck-like protein containing a CARD;Pycard;ortholog
MOUSE|MGI=MGI=1346859|UniProtKB=Q63844	Mapk3	Mitogen-activated protein kinase 3;Mapk3;ortholog
MOUSE|MGI=MGI=107825|UniProtKB=Q05910	Adam8	Disintegrin and metalloproteinase domain-containing protein 8;Adam8;ortholog
MOUSE|MGI=MGI=1915862|UniProtKB=Q9D1C1	Ube2c	Ubiquitin-conjugating enzyme E2 C;Ube2c;ortholog
MOUSE|MGI=MGI=1261423|UniProtKB=O89110	Casp8	Caspase-8;Casp8;ortholog
MOUSE|MGI=MGI=106388|UniProtKB=Q99JW1	Abhd17a	Alpha/beta hydrolase domain-containing protein 17A;Abhd17a;ortholog
MOUSE|MGI=MGI=1336194|UniProtKB=O89023	Tpp1	Tripeptidyl-peptidase 1;Tpp1;ortholog
MOUSE|MGI=MGI=106210|UniProtKB=Q60997	Dmbt1	Deleted in malignant brain tumors 1 protein;Dmbt1;ortholog
MOUSE|MGI=MGI=2182368|UniProtKB=Q9ERE3	Sgk3	Serine/threonine-protein kinase Sgk3;Sgk3;ortholog
MOUSE|MGI=MGI=3045348|UniProtKB=Q5U901	Cpa6	Carboxypeptidase A6;Cpa6;ortholog
MOUSE|MGI=MGI=1929076|UniProtKB=Q9R118	Htra1	Serine protease HTRA1;Htra1;ortholog
MOUSE|MGI=MGI=1914263|UniProtKB=Q9D8H7	Oma1	Metalloendopeptidase OMA1, mitochondrial;Oma1;ortholog
MOUSE|MGI=MGI=1918328|UniProtKB=Q811Q3	Adam30	A disintegrin and metallopeptidase domain 30;Adam30;ortholog
MOUSE|MGI=MGI=1913374|UniProtKB=Q9CR30	Josd2	Josephin-2;Josd2;ortholog
MOUSE|MGI=MGI=96412|UniProtKB=Q9JHR7	Ide	Insulin-degrading enzyme;Ide;ortholog
MOUSE|MGI=MGI=88380|UniProtKB=P19221	Thrb	Prothrombin;F2;ortholog
MOUSE|MGI=MGI=1344373|UniProtKB=Q9Z2M6	Ubl3	Ubiquitin-like protein 3;Ubl3;ortholog
MOUSE|MGI=MGI=1336166|UniProtKB=O35732	Cflar	CASP8 and FADD-like apoptosis regulator;Cflar;ortholog
MOUSE|MGI=MGI=1338068|UniProtKB=Q9Z2A0	Pdk1	3-phosphoinositide-dependent protein kinase 1;Pdpk1;ortholog
MOUSE|MGI=MGI=1915155|UniProtKB=Q8BU27	Ppm1m	Protein phosphatase 1M;Ppm1m;ortholog
MOUSE|MGI=MGI=95801|UniProtKB=O70291	Grk4	G protein-coupled receptor kinase 4;Grk4;ortholog
MOUSE|MGI=MGI=1355313|UniProtKB=Q8CG16	C1ra	Complement C1r-A subcomponent;C1ra;ortholog
MOUSE|MGI=MGI=1929612|UniProtKB=Q9R0T8	Ikbke	Inhibitor of nuclear factor kappa-B kinase subunit epsilon;Ikbke;ortholog
MOUSE|MGI=MGI=2385286|UniProtKB=Q3TQR0	Pgap2	Post-GPI attachment to proteins factor 2;Pgap2;ortholog
MOUSE|MGI=MGI=1923719|UniProtKB=Q70KF4	Cmya5	Cardiomyopathy-associated protein 5;Cmya5;ortholog
MOUSE|MGI=MGI=2389008|UniProtKB=Q80T21	Adamtsl4	ADAMTS-like protein 4;Adamtsl4;ortholog
MOUSE|MGI=MGI=3046414|UniProtKB=Q6HA09	Astl	Astacin-like metalloendopeptidase;Astl;ortholog
MOUSE|MGI=MGI=1351318|UniProtKB=Q9QZS5	Sgk2	Serine/threonine-protein kinase Sgk2;Sgk2;ortholog
MOUSE|MGI=MGI=1314872|UniProtKB=Q9QZR5	Hipk2	Homeodomain-interacting protein kinase 2;Hipk2;ortholog
MOUSE|MGI=MGI=106657|UniProtKB=Q62191	Trim21	E3 ubiquitin-protein ligase TRIM21;Trim21;ortholog
MOUSE|MGI=MGI=1913764|UniProtKB=Q8C0M9	Asrgl1	Isoaspartyl peptidase/L-asparaginase;Asrgl1;ortholog
MOUSE|MGI=MGI=892021|UniProtKB=Q61754	Klk1b24	Kallikrein 1-related peptidase b24;Klk1b24;ortholog
MOUSE|MGI=MGI=95706|UniProtKB=Q60928	Ggt1	Glutathione hydrolase 1 proenzyme;Ggt1;ortholog
MOUSE|MGI=MGI=1890645|UniProtKB=Q9ES74	Nek7	Serine/threonine-protein kinase Nek7;Nek7;ortholog
MOUSE|MGI=MGI=2685865|UniProtKB=Q14B25	Prss48	Serine protease 48;Prss48;ortholog
MOUSE|MGI=MGI=1918085|UniProtKB=Q9ER10	Prss22	Brain-specific serine protease 4;Prss22;ortholog
MOUSE|MGI=MGI=107168|UniProtKB=O70126	Aurkb	Aurora kinase B;Aurkb;ortholog
MOUSE|MGI=MGI=1338881|UniProtKB=P56677	St14	Suppressor of tumorigenicity 14 protein homolog;St14;ortholog
MOUSE|MGI=MGI=95314|UniProtKB=Q91X79	Cela1	Chymotrypsin-like elastase family member 1;Cela1;ortholog
MOUSE|MGI=MGI=109553|UniProtKB=P97821	Ctsc	Dipeptidyl peptidase 1;Ctsc;ortholog
MOUSE|MGI=MGI=102518|UniProtKB=F8VQ03	Adam3	A disintegrin and metallopeptidase domain 3;Adam3;ortholog
MOUSE|MGI=MGI=1100850|UniProtKB=O35646	Capn6	Calpain-6;Capn6;ortholog
MOUSE|MGI=MGI=2384308|UniProtKB=Q922H2	Pdk3	[Pyruvate dehydrogenase (acetyl-transferring)] kinase isozyme 3, mitochondrial;Pdk3;ortholog
MOUSE|MGI=MGI=2656973|UniProtKB=Q3UIR3	Dtx3l	E3 ubiquitin-protein ligase DTX3L;Dtx3l;ortholog
MOUSE|MGI=MGI=1916931|UniProtKB=Q80YP0	Cdkn3	Cyclin-dependent kinase 3;Cdk3;ortholog
MOUSE|MGI=MGI=1351327|UniProtKB=Q60963	Pla2g7	Platelet-activating factor acetylhydrolase;Pla2g7;ortholog
MOUSE|MGI=MGI=1917364|UniProtKB=A2BFE8	Prrg1	Proline-rich Gla (G-carboxyglutamic acid) 1;Prrg1;ortholog
MOUSE|MGI=MGI=1341297|UniProtKB=Q8VDF3	Dapk2	Death-associated protein kinase 2;Dapk2;ortholog
MOUSE|MGI=MGI=4821183|UniProtKB=D3Z3L3	Trim12c	Tripartite motif-containing 12C;Trim12c;ortholog
MOUSE|MGI=MGI=1858178|UniProtKB=O88623	Usp2	Ubiquitin carboxyl-terminal hydrolase 2;Usp2;ortholog
MOUSE|MGI=MGI=3644318|UniProtKB=Q8C0N0	Gm4922	Sperm motility kinase Z;Gm4922;ortholog
MOUSE|MGI=MGI=1859866|UniProtKB=Q9JJ66	Cdc20	Cell division cycle protein 20 homolog;Cdc20;ortholog
MOUSE|MGI=MGI=2147903|UniProtKB=Q8C9S8	Atg4a	Cysteine protease ATG4A;Atg4a;ortholog
MOUSE|MGI=MGI=1914500|UniProtKB=Q9QZU9	Ube2l6	Ubiquitin/ISG15-conjugating enzyme E2 L6;Ube2l6;ortholog
MOUSE|MGI=MGI=105986|UniProtKB=Q9R157	Adam18	Disintegrin and metalloproteinase domain-containing protein 18;Adam18;ortholog
MOUSE|MGI=MGI=1917816|UniProtKB=Q7M759	Abhd17b	Alpha/beta hydrolase domain-containing protein 17B;Abhd17b;ortholog
MOUSE|MGI=MGI=105376|UniProtKB=Q61072	Adam9	Disintegrin and metalloproteinase domain-containing protein 9;Adam9;ortholog
MOUSE|MGI=MGI=2685650|UniProtKB=G3UZN6	Abhd12b	Abhydrolase domain-containing 12B;Abhd12b;ortholog
MOUSE|MGI=MGI=2446214|UniProtKB=Q6NXK9	Man1c1	alpha-1,2-Mannosidase;Man1c1;ortholog
MOUSE|MGI=MGI=1343085|UniProtKB=Q6ZWS8	Spop	Speckle-type POZ protein;Spop;ortholog
MOUSE|MGI=MGI=104677|UniProtKB=P45700	Man1a	Mannosyl-oligosaccharide 1,2-alpha-mannosidase IA;Man1a1;ortholog
MOUSE|MGI=MGI=1914727|UniProtKB=Q5F2F2	Abhd15	Protein ABHD15;Abhd15;ortholog
MOUSE|MGI=MGI=1858193|UniProtKB=O35409	Folh1	Glutamate carboxypeptidase 2;Folh1;ortholog
MOUSE|MGI=MGI=96544|UniProtKB=P29452	Casp1	Caspase-1;Casp1;ortholog
MOUSE|MGI=MGI=1337096|UniProtKB=Q9WTZ1	Sag	RING-box protein 2;Rnf7;ortholog
MOUSE|MGI=MGI=1918448|UniProtKB=Q9CUB6	Otud1	OTU domain-containing protein 1;Otud1;ortholog
MOUSE|MGI=MGI=2652894|UniProtKB=Q80Y86	Mapk15	Mitogen-activated protein kinase 15;Mapk15;ortholog
MOUSE|MGI=MGI=3643092|UniProtKB=Q0MW30	Neurl3	E3 ubiquitin-protein ligase NEURL1B;Neurl1b;ortholog
MOUSE|MGI=MGI=1931013|UniProtKB=Q9QZC8	Abhd1	Protein ABHD1;Abhd1;ortholog
MOUSE|MGI=MGI=2672033|UniProtKB=Q3UTY6	Thsd4	Thrombospondin type-1 domain-containing protein 4;Thsd4;ortholog
MOUSE|MGI=MGI=1923880|UniProtKB=Q76N33	Stambpl1	AMSH-like protease;Stambpl1;ortholog
MOUSE|MGI=MGI=2384997|UniProtKB=Q91W82	Ube2e2	Ubiquitin-conjugating enzyme E2 E2;Ube2e2;ortholog
MOUSE|MGI=MGI=1289156|UniProtKB=Q9JJ78	Pbk	Lymphokine-activated killer T-cell-originated protein kinase;Pbk;ortholog
MOUSE|MGI=MGI=1914588|UniProtKB=Q6ZQM0	Rffl	E3 ubiquitin-protein ligase rififylin;Rffl;ortholog
MOUSE|MGI=MGI=98178|UniProtKB=P15533	Trim30a	Tripartite motif-containing protein 30A;Trim30a;ortholog
MOUSE|MGI=MGI=1196377|UniProtKB=Q60769	Tnfaip3	Tumor necrosis factor alpha-induced protein 3;Tnfaip3;ortholog
MOUSE|MGI=MGI=1919810|UniProtKB=Q9CZR2	Naalad2	N-acetylated-alpha-linked acidic dipeptidase 2;Naalad2;ortholog
MOUSE|MGI=MGI=2147183|UniProtKB=Q91ZH7	Abhd3	Phospholipase ABHD3;Abhd3;ortholog
MOUSE|MGI=MGI=1329035|UniProtKB=Q9Z0L8	Ggh	Gamma-glutamyl hydrolase;Ggh;ortholog
MOUSE|MGI=MGI=3687012|UniProtKB=Q792Z1	Try10	MCG140784;Try10;ortholog
MOUSE|MGI=MGI=1349462|UniProtKB=Q9DBK7	Uba7	MCG18845, isoform CRA_d;Uba7;ortholog
MOUSE|MGI=MGI=1913951|UniProtKB=Q91WK1	Spry4	SPRY domain-containing protein 4;Spryd4;ortholog
MOUSE|MGI=MGI=1918349|UniProtKB=Q9D411	Tssk4	Testis-specific serine/threonine-protein kinase 4;Tssk4;ortholog
MOUSE|MGI=MGI=88554|UniProtKB=P12399	Ctla2a	Protein CTLA-2-alpha;Ctla2a;ortholog
MOUSE|MGI=MGI=3028499|UniProtKB=G3UXC7	Adamtsl3	ADAMTS-like 3;Adamtsl3;ortholog
MOUSE|MGI=MGI=2137359|UniProtKB=Q99PP6	Trim34a	Tripartite motif-containing protein 34A;Trim34a;ortholog
MOUSE|MGI=MGI=1926119|UniProtKB=Q8BFP9	Pdk1	[Pyruvate dehydrogenase (acetyl-transferring)] kinase isozyme 1, mitochondrial;Pdk1;ortholog
Protein-binding activity modulator (PC00095)
MOUSE|MGI=MGI=3615484|UniProtKB=B2RWW0	Tagap	T-cell activation Rho GTPase-activating protein;Tagap;ortholog
MOUSE|MGI=MGI=1270851|UniProtKB=O09051	Guca2b	Guanylate cyclase activator 2B;Guca2b;ortholog
MOUSE|MGI=MGI=101780|UniProtKB=Q07235	Serpine2	Glia-derived nexin;Serpine2;ortholog
MOUSE|MGI=MGI=3605620|UniProtKB=Q8BTS3	Gbp9	Guanylate-binding protein 9;Gbp9;ortholog
MOUSE|MGI=MGI=1922664|UniProtKB=Q52KE7	Ccn1	Cyclin-L1;Ccnl1;ortholog
MOUSE|MGI=MGI=1914951|UniProtKB=Q9DAU7	Wfdc2	WAP four-disulfide core domain protein 2;Wfdc2;ortholog
MOUSE|MGI=MGI=893584|UniProtKB=Q61017	Gng8	Guanine nucleotide-binding protein G(I)/G(S)/G(O) subunit gamma-T2;Gngt2;ortholog
MOUSE|MGI=MGI=3511744|UniProtKB=G3X987	Gimap9	GTPase IMAP family member 9;Gimap9;ortholog
MOUSE|MGI=MGI=109164|UniProtKB=Q80SZ7	Gng5	Guanine nucleotide-binding protein G(I)/G(S)/G(O) subunit gamma-5;Gng5;ortholog
MOUSE|MGI=MGI=1918869|UniProtKB=Q3SXC5	Arl14	ADP-ribosylation factor-like protein 14;Arl14;ortholog
MOUSE|MGI=MGI=2146322|UniProtKB=Q570Y9	Deptor	DEP domain-containing mTOR-interacting protein;Deptor;ortholog
MOUSE|MGI=MGI=109514|UniProtKB=Q62426	Cstb	Cystatin-B;Cstb;ortholog
MOUSE|MGI=MGI=2444024|UniProtKB=Q80UW3	Rinl	Ras and Rab interactor-like protein;Rinl;ortholog
MOUSE|MGI=MGI=1314635|UniProtKB=Q9Z1S3	Rasgrp1	RAS guanyl-releasing protein 1;Rasgrp1;ortholog
MOUSE|MGI=MGI=2444223|UniProtKB=Q8BHJ6	Serinc5	Serine incorporator 5;Serinc5;ortholog
MOUSE|MGI=MGI=1336169|UniProtKB=Q9CXP8	Gng10	Guanine nucleotide-binding protein G(I)/G(S)/G(O) subunit gamma-10;Gng10;ortholog
MOUSE|MGI=MGI=2445361|UniProtKB=Q8VHP7	Serpinb1b	Leukocyte elastase inhibitor B;Serpinb1b;ortholog
MOUSE|MGI=MGI=96031|UniProtKB=P06684	Hc	Complement C5;C5;ortholog
MOUSE|MGI=MGI=109165|UniProtKB=Q61012	Gngt1	Guanine nucleotide-binding protein G(T) subunit gamma-T1;Gngt1;ortholog
MOUSE|MGI=MGI=1925751|UniProtKB=Q8BJD1	Itih5	Inter-alpha-trypsin inhibitor heavy chain H5;Itih5;ortholog
MOUSE|MGI=MGI=95770|UniProtKB=P30678	Gna15	Guanine nucleotide-binding protein subunit alpha-15;Gna15;ortholog
MOUSE|MGI=MGI=95769|UniProtKB=P30677	Gna14	Guanine nucleotide-binding protein subunit alpha-14;Gna14;ortholog
MOUSE|MGI=MGI=2444128|UniProtKB=Q8C2K5	Rasal3	RAS protein activator like-3;Rasal3;ortholog
MOUSE|MGI=MGI=1345629|UniProtKB=Q8BYP3	Rhof	Rho-related GTP-binding protein RhoF;Rhof;ortholog
MOUSE|MGI=MGI=1925616|UniProtKB=Q9JMF3	Gng13	Guanine nucleotide-binding protein G(I)/G(S)/G(O) subunit gamma-13;Gng13;ortholog
MOUSE|MGI=MGI=1926263|UniProtKB=Q61107	Gbp3	Guanylate-binding protein 4;Gbp4;ortholog
MOUSE|MGI=MGI=1916903|UniProtKB=A2AB59	Arhgap27	Rho GTPase-activating protein 27;Arhgap27;ortholog
MOUSE|MGI=MGI=107576|UniProtKB=P46062	Sipa1	Signal-induced proliferation-associated protein 1;Sipa1;ortholog
MOUSE|MGI=MGI=2664539|UniProtKB=Q8VE04	Mob3b	MOB kinase activator 3B;Mob3b;ortholog
MOUSE|MGI=MGI=2685741|UniProtKB=Q8CIE0	Serpina11	Serpin A11;Serpina11;ortholog
MOUSE|MGI=MGI=2446138|UniProtKB=B1AVP0	Phactr2	Phosphatase and actin regulator;Phactr2;ortholog
MOUSE|MGI=MGI=1353657|UniProtKB=O88842	Fgd3	FYVE, RhoGEF and PH domain-containing protein 3;Fgd3;ortholog
MOUSE|MGI=MGI=109125|UniProtKB=Q9JHB3	Timp4	Metalloproteinase inhibitor 4;Timp4;ortholog
MOUSE|MGI=MGI=1201791|UniProtKB=O35718	Socs3	Suppressor of cytokine signaling 3;Socs3;ortholog
MOUSE|MGI=MGI=1917723|UniProtKB=Q9EQZ6	Rapgef4	Rap guanine nucleotide exchange factor 4;Rapgef4;ortholog
MOUSE|MGI=MGI=1927136|UniProtKB=O88848	Arl6	ADP-ribosylation factor-like protein 6;Arl6;ortholog
MOUSE|MGI=MGI=1913472|UniProtKB=Q9D154	Serpinb1a	Leukocyte elastase inhibitor A;Serpinb1a;ortholog
MOUSE|MGI=MGI=1349457|UniProtKB=Q9QZI9	Serinc3	Serine incorporator 3;Serinc3;ortholog
MOUSE|MGI=MGI=2652871|UniProtKB=B2RY04	Dock5	Dedicator of cytokinesis protein 5;Dock5;ortholog
MOUSE|MGI=MGI=2442232|UniProtKB=Q8BWF2	Gimap5	GTPase IMAP family member 5;Gimap5;ortholog
MOUSE|MGI=MGI=1347084|UniProtKB=Q8BY35	Fgd2	FYVE, RhoGEF and PH domain-containing protein 2;Fgd2;ortholog
MOUSE|MGI=MGI=99435|UniProtKB=P62331	Arf6	ADP-ribosylation factor 6;Arf6;ortholog
MOUSE|MGI=MGI=1916831|UniProtKB=Q9EQT3	Rhou	Rho-related GTP-binding protein RhoU;Rhou;ortholog
MOUSE|MGI=MGI=95787|UniProtKB=Q61016	Gng7	Guanine nucleotide-binding protein G(I)/G(S)/G(O) subunit gamma-7;Gng7;ortholog
MOUSE|MGI=MGI=2151841|UniProtKB=Q8VHQ3	Ppp1r16b	Protein phosphatase 1 regulatory inhibitor subunit 16B;Ppp1r16b;ortholog
MOUSE|MGI=MGI=1203517|UniProtKB=O70201	Birc5	Baculoviral IAP repeat-containing protein 5;Birc5;ortholog
MOUSE|MGI=MGI=1341847|UniProtKB=Q7TN16	Hhip	Hedgehog-interacting protein;Hhip;ortholog
MOUSE|MGI=MGI=97852|UniProtKB=P62835	Rap1a	Ras-related protein Rap-1A;Rap1a;ortholog
MOUSE|MGI=MGI=95778|UniProtKB=P20612	Gnat1	Guanine nucleotide-binding protein G(t) subunit alpha-1;Gnat1;ortholog
MOUSE|MGI=MGI=2429765|UniProtKB=Q8BUR4	Dock1	Dedicator of cytokinesis protein 1;Dock1;ortholog
MOUSE|MGI=MGI=1277953|UniProtKB=Q9EPK2	Rp2	Protein XRP2;Rp2;ortholog
MOUSE|MGI=MGI=1915776|UniProtKB=A2AWR3	Gpr155	G protein-coupled receptor 155;Gpr155;ortholog
MOUSE|MGI=MGI=96620|UniProtKB=Q61704	Itih3	Inter-alpha-trypsin inhibitor heavy chain H3;Itih3;ortholog
MOUSE|MGI=MGI=3041243|UniProtKB=Q2TB02	Nfkbid	NF-kappa-B inhibitor delta;Nfkbid;ortholog
MOUSE|MGI=MGI=1922072|UniProtKB=Q8C9V1	Tbc1d10c	Carabin;Tbc1d10c;ortholog
MOUSE|MGI=MGI=1333849|UniProtKB=Q9QUG9	Rasgrp2	RAS guanyl-releasing protein 2;Rasgrp2;ortholog
MOUSE|MGI=MGI=2448556|UniProtKB=Q8K031	Stard8	StAR-related lipid transfer protein 8;Stard8;ortholog
MOUSE|MGI=MGI=98179|UniProtKB=P10833	Rras	Ras-related protein R-Ras;Rras;ortholog
MOUSE|MGI=MGI=1931551|UniProtKB=Q9ER71	Rhoj	Rho-related GTP-binding protein RhoJ;Rhoj;ortholog
MOUSE|MGI=MGI=1928370|UniProtKB=P84096	Rhog	Rho-related GTP-binding protein RhoG;Rhog;ortholog
MOUSE|MGI=MGI=103123|UniProtKB=Q60854	Serpinb6a	Serpin B6;Serpinb6;ortholog
MOUSE|MGI=MGI=2385331|UniProtKB=Q923Q2	Stard13	StAR-related lipid transfer protein 13;Stard13;ortholog
MOUSE|MGI=MGI=2444300|UniProtKB=Q80Y19	Arhgap11a	Rho GTPase-activating protein 11A;Arhgap11a;ortholog
MOUSE|MGI=MGI=96619|UniProtKB=Q61703	Itih2	Inter-alpha-trypsin inhibitor heavy chain H2;Itih2;ortholog
MOUSE|MGI=MGI=102738|UniProtKB=P33680	Guca2a	Guanylin;Guca2a;ortholog
MOUSE|MGI=MGI=1349656|UniProtKB=Q99JY3	Gimap4	GTPase IMAP family member 4;Gimap4;ortholog
MOUSE|MGI=MGI=108446|UniProtKB=P97348	Rhod	Rho-related GTP-binding protein RhoD;Rhod;ortholog
MOUSE|MGI=MGI=102772|UniProtKB=Q9Z0E6	Gbp2	Guanylate-binding protein 2;Gbp2;ortholog
MOUSE|MGI=MGI=1336171|UniProtKB=Q9DAS9	Gng12	Guanine nucleotide-binding protein G(I)/G(S)/G(O) subunit gamma-12;Gng12;ortholog
MOUSE|MGI=MGI=1918101|UniProtKB=A3KGB4	Tbc1d8b	TBC1 domain family member 8B;Tbc1d8b;ortholog
MOUSE|MGI=MGI=1096342|UniProtKB=Q9QUI0	Rhoa	Transforming protein RhoA;Rhoa;ortholog
MOUSE|MGI=MGI=1338755|UniProtKB=Q9QYM5	Rnd2	Rho-related GTP-binding protein RhoN;Rnd2;ortholog
MOUSE|MGI=MGI=1354694|UniProtKB=Q9JL25	Rgs1	Regulator of G-protein signaling 1;Rgs1;ortholog
MOUSE|MGI=MGI=2146320|UniProtKB=Q8BZN6	Dock10	Dedicator of cytokinesis protein 10;Dock10;ortholog
MOUSE|MGI=MGI=95772|UniProtKB=P08752	Gnai2	Guanine nucleotide-binding protein G(i) subunit alpha-2;Gnai2;ortholog
MOUSE|MGI=MGI=1330842|UniProtKB=Q9Z268	Rasal1	RasGAP-activating-like protein 1;Rasal1;ortholog
MOUSE|MGI=MGI=101937|UniProtKB=Q04758	Pkib	cAMP-dependent protein kinase inhibitor beta;Pkib;ortholog
MOUSE|MGI=MGI=1927244|UniProtKB=Q9JIW9	Ralb	Ras-related protein Ral-B;Ralb;ortholog
MOUSE|MGI=MGI=1921984|UniProtKB=Q9D3G9	Rhoh	Rho-related GTP-binding protein RhoH;Rhoh;ortholog
MOUSE|MGI=MGI=894688|UniProtKB=O08804	Serpinb6b	NK13;Serpinb6b;ortholog
MOUSE|MGI=MGI=1918876|UniProtKB=Q8K349	Gimap6	GTPase IMAP family member 6;Gimap6;ortholog
MOUSE|MGI=MGI=2442631|UniProtKB=Q921Y0	Mob1a	MOB kinase activator 1A;Mob1a;ortholog
MOUSE|MGI=MGI=2149010|UniProtKB=Q8C3J5	Dock2	Dedicator of cytokinesis protein 2;Dock2;ortholog
MOUSE|MGI=MGI=2143764|UniProtKB=Q1HDU4	Arhgap9	ArhGAP9;Arhgap9;ortholog
MOUSE|MGI=MGI=97845|UniProtKB=P63001	Rac1	Ras-related C3 botulinum toxin substrate 1;Rac1;ortholog
MOUSE|MGI=MGI=97855|UniProtKB=Q80ZJ1	Rap2a	Ras-related protein Rap-2a;Rap2a;ortholog
MOUSE|MGI=MGI=106028|UniProtKB=Q62159	Rhoc	Rho-related GTP-binding protein RhoC;Rhoc;ortholog
MOUSE|MGI=MGI=104581|UniProtKB=P29387	Gnb4	Guanine nucleotide-binding protein subunit beta-4;Gnb4;ortholog
MOUSE|MGI=MGI=1098236|UniProtKB=P51125	Cast	Calpastatin;Cast;ortholog
MOUSE|MGI=MGI=3028579|UniProtKB=Q6NZH9	Rasgrp3	RAS, guanyl-releasing protein 3;Rasgrp3;ortholog
MOUSE|MGI=MGI=1197013|UniProtKB=Q60790	Rasa3	Ras GTPase-activating protein 3;Rasa3;ortholog
MOUSE|MGI=MGI=1931595|UniProtKB=Q9EST8	Nfkbiz	NF-kappa-B inhibitor zeta;Nfkbiz;ortholog
MOUSE|MGI=MGI=96932|UniProtKB=A0A2I3BR92	Mcf2	Mcf.2-transforming sequence;Mcf2;ortholog
MOUSE|MGI=MGI=2444453|UniProtKB=Q8C033	Arhgef10	Rho guanine nucleotide exchange factor 10;Arhgef10;ortholog
MOUSE|MGI=MGI=3696881|UniProtKB=L7N257	Cstdc6	Cystatin domain-containing 6;Cstdc6;ortholog
MOUSE|MGI=MGI=3050117|UniProtKB=Q8BSU7	Mob3a	MOB kinase activator 3A;Mob3a;ortholog
MOUSE|MGI=MGI=1924045|UniProtKB=Q5SVR0	Tbc1d9b	TBC1 domain family member 9B;Tbc1d9b;ortholog
MOUSE|MGI=MGI=88311|UniProtKB=P30276	Ccnb2	G2/mitotic-specific cyclin-B2;Ccnb2;ortholog
MOUSE|MGI=MGI=1932723|UniProtKB=Q99MI6	Gimap3	GTPase IMAP family member 3;Gimap3;ortholog
MOUSE|MGI=MGI=87963|UniProtKB=P11859	Agt	Angiotensinogen;Agt;ortholog
MOUSE|MGI=MGI=1923734|UniProtKB=Q0KK55	Kndc1	Kinase non-catalytic C-lobe domain-containing protein 1;Kndc1;ortholog
MOUSE|MGI=MGI=1921396|UniProtKB=Q8C147	Dock8	Dedicator of cytokinesis protein 8;Dock8;ortholog
MOUSE|MGI=MGI=106603|UniProtKB=O08797	Serpinb9	SPI6;Serpinb9;ortholog
MOUSE|MGI=MGI=2429943|UniProtKB=Q8CFB4	Gbp5	Guanylate-binding protein 5;Gbp5;ortholog
MOUSE|MGI=MGI=109163|UniProtKB=P63078	Gng8	Guanine nucleotide-binding protein G(I)/G(S)/G(O) subunit gamma-8;Gng8;ortholog
MOUSE|MGI=MGI=2442259|UniProtKB=Q3TCV3	Gsap	Gamma-secretase-activating protein;Gsap;ortholog
MOUSE|MGI=MGI=1914172|UniProtKB=P62071	Rras2	Ras-related protein R-Ras2;Rras2;ortholog
MOUSE|MGI=MGI=109137|UniProtKB=P70392	Rasgrf2	Ras-specific guanine nucleotide-releasing factor 2;Rasgrf2;ortholog
MOUSE|MGI=MGI=2140623|UniProtKB=Q8BJG4	Mob3c	MOB kinase activator 3C;Mob3c;ortholog
MOUSE|MGI=MGI=95771|UniProtKB=B2RSH2	Gnai1	Guanine nucleotide-binding protein G(i) subunit alpha-1;Gnai1;ortholog
MOUSE|MGI=MGI=1197009|UniProtKB=Q62210	Birc2	Baculoviral IAP repeat-containing protein 2;Birc2;ortholog
MOUSE|MGI=MGI=108080|UniProtKB=P97298	Serpinf1	Pigment epithelium-derived factor;Serpinf1;ortholog
MOUSE|MGI=MGI=109579|UniProtKB=P70124	Serpinb5	Serpin B5;Serpinb5;ortholog
MOUSE|MGI=MGI=104838|UniProtKB=Q5DU57	Spata13	Spermatogenesis-associated protein 13;Spata13;ortholog
MOUSE|MGI=MGI=96051|UniProtKB=P49182	Serpind1	Heparin cofactor 2;Serpind1;ortholog
MOUSE|MGI=MGI=1890391|UniProtKB=Q9EQC7	Fstl3	Follistatin-related protein 3;Fstl3;ortholog
MOUSE|MGI=MGI=109368|UniProtKB=P70224	Gimap1	GTPase IMAP family member 1;Gimap1;ortholog
MOUSE|MGI=MGI=88315|UniProtKB=P30282	Ccnd3	G1/S-specific cyclin-D3;Ccnd3;ortholog
MOUSE|MGI=MGI=95767|UniProtKB=P27600	Gna12	Guanine nucleotide-binding protein subunit alpha-12;Gna12;ortholog
MOUSE|MGI=MGI=1913316|UniProtKB=P61953	Gng11	Guanine nucleotide-binding protein G(I)/G(S)/G(O) subunit gamma-11;Gng11;ortholog
MOUSE|MGI=MGI=106211|UniProtKB=P60766	Cdc42	Cell division control protein 42 homolog;Cdc42;ortholog
MOUSE|MGI=MGI=1927225|UniProtKB=Q9Z1A9	Tbc1d8	TBC1 domain family member 8;Tbc1d8;ortholog
MOUSE|MGI=MGI=3040696|UniProtKB=Q69ZK0	Prex1	Phosphatidylinositol 3,4,5-trisphosphate-dependent Rac exchanger 1 protein;Prex1;ortholog
MOUSE|MGI=MGI=97609|UniProtKB=P12388	Serpinb2	Plasminogen activator inhibitor 2, macrophage;Serpinb2;ortholog
MOUSE|MGI=MGI=102890|UniProtKB=P51945	Ccng1	Cyclin-G1;Ccng1;ortholog
MOUSE|MGI=MGI=105046|UniProtKB=Q5I2A0	Serpina3g	Serine protease inhibitor A3G;Serpina3g;ortholog
Gene-specific transcriptional regulator (PC00264)
MOUSE|MGI=MGI=1919389|UniProtKB=A0A087WRJ1	2610044O15Rik8	RIKEN cDNA 2610044O15 gene;2610044O15Rik8;ortholog
MOUSE|MGI=MGI=2142079|UniProtKB=Q7TPX5	AI987944	Expressed sequence AI987944;AI987944;ortholog
MOUSE|MGI=MGI=2686159|UniProtKB=Q91VJ1	Aim2	Interferon-inducible protein AIM2;Aim2;ortholog
MOUSE|MGI=MGI=2443039|UniProtKB=Q3U108	Arid5a	AT-rich interactive domain-containing protein 5A;Arid5a;ortholog
MOUSE|MGI=MGI=104654|UniProtKB=P48985	Atoh1	Protein atonal homolog 1;Atoh1;ortholog
MOUSE|MGI=MGI=2142212|UniProtKB=Q3TPQ7	AW146154	Expressed sequence AW146154;AW146154;ortholog
MOUSE|MGI=MGI=109617|UniProtKB=O08686	Barx2	Homeobox protein BarH-like 2;Barx2;ortholog
MOUSE|MGI=MGI=1859147|UniProtKB=O35284	Batf	Basic leucine zipper transcriptional factor ATF-like;Batf;ortholog
MOUSE|MGI=MGI=107187|UniProtKB=P41183	Bcl6	B-cell lymphoma 6 protein homolog;Bcl6;ortholog
MOUSE|MGI=MGI=1930704|UniProtKB=Q99PV5	Bhlhe41	Class E basic helix-loop-helix protein 41;Bhlhe41;ortholog
MOUSE|MGI=MGI=88373|UniProtKB=P28033	Cebpb	CCAAT/enhancer-binding protein beta;Cebpb;ortholog
MOUSE|MGI=MGI=1929988|UniProtKB=Q9EPW2	Cklf	Krueppel-like factor 15;Klf15;ortholog
MOUSE|MGI=MGI=2443973|UniProtKB=Q8K1L0	Creb5	Cyclic AMP-responsive element-binding protein 5;Creb5;ortholog
MOUSE|MGI=MGI=95295|UniProtKB=P08046	Egr1	Early growth response protein 1;Egr1;ortholog
MOUSE|MGI=MGI=95296|UniProtKB=P08152	Egr2	E3 SUMO-protein ligase EGR2;Egr2;ortholog
MOUSE|MGI=MGI=107180|UniProtKB=Q60775	Elf1	ETS-related transcription factor Elf-1;Elf1;ortholog
MOUSE|MGI=MGI=1101781|UniProtKB=Q3UPW2	Elf3	ETS-related transcription factor Elf-3;Elf3;ortholog
MOUSE|MGI=MGI=95390|UniProtKB=P09066	En2	Homeobox protein engrailed-2;En2;ortholog
MOUSE|MGI=MGI=1201683|UniProtKB=O54839	Eomes	Eomesodermin homolog;Eomes;ortholog
MOUSE|MGI=MGI=95455|UniProtKB=P27577	Ets1	Protein C-ets-1;Ets1;ortholog
MOUSE|MGI=MGI=99254|UniProtKB=P41164	Etv1	ETS translocation variant 1;Etv1;ortholog
MOUSE|MGI=MGI=1096867|UniProtKB=Q9CXC9	Etv5	ETS translocation variant 5;Etv5;ortholog
MOUSE|MGI=MGI=95554|UniProtKB=P26323	Fli1	Friend leukemia integration 1 transcription factor;Fli1;ortholog
MOUSE|MGI=MGI=95574|UniProtKB=P01101	Fos	Proto-oncogene c-Fos;Fos;ortholog
MOUSE|MGI=MGI=102858|UniProtKB=P47930	Fosl2	Fos-related antigen 2;Fosl2;ortholog
MOUSE|MGI=MGI=1298228|UniProtKB=O70220	Foxq1	Forkhead box protein Q1;Foxq1;ortholog
MOUSE|MGI=MGI=103170|UniProtKB=P70338	Gfi1	Zinc finger protein Gfi-1;Gfi1;ortholog
MOUSE|MGI=MGI=3651014|UniProtKB=B1ASQ7	Gm13212	Predicted gene 13212;Gm13212;ortholog
MOUSE|MGI=MGI=3652185|UniProtKB=A2AW66	Gm14322	Predicted gene 14322;Gm14322;ortholog
MOUSE|MGI=MGI=3702875|UniProtKB=A2AW67	Gm14325	Predicted gene 14325;Gm14325;ortholog
MOUSE|MGI=MGI=2135679|UniProtKB=Q8BKT2	Hes7	Transcription factor HES-7;Hes7;ortholog
MOUSE|MGI=MGI=96086|UniProtKB=P43120	Hhex	Hematopoietically-expressed homeobox protein Hhex;Hhex;ortholog
MOUSE|MGI=MGI=96396|UniProtKB=P20067	Id1	DNA-binding protein inhibitor ID-1;Id1;ortholog
MOUSE|MGI=MGI=96398|UniProtKB=P41133	Id3	DNA-binding protein inhibitor ID-3;Id3;ortholog
MOUSE|MGI=MGI=96428|UniProtKB=O35368	Ifi203	Interferon-activable protein 203;Ifi203;ortholog
MOUSE|MGI=MGI=2138243|UniProtKB=Q8BV49	Ifi209	Pyrin and HIN domain-containing protein 1;Pyhin1;ortholog
MOUSE|MGI=MGI=3695276|UniProtKB=D3Z5G0	Ifi213	Interferon-activated gene 213;Ifi213;ortholog
MOUSE|MGI=MGI=1917360|UniProtKB=Q9D8C4	Ifi35	Interferon-induced 35 kDa protein homolog;Ifi35;ortholog
MOUSE|MGI=MGI=1342540|UniProtKB=Q03267	Ikzf1	DNA-binding protein Ikaros;Ikzf1;ortholog
MOUSE|MGI=MGI=1342542|UniProtKB=O08900	Ikzf3	Zinc finger protein Aiolos;Ikzf3;ortholog
MOUSE|MGI=MGI=96590|UniProtKB=P15314	Irf1	Interferon regulatory factor 1;Irf1;ortholog
MOUSE|MGI=MGI=96591|UniProtKB=P23906	Irf2	Interferon regulatory factor 2;Irf2;ortholog
MOUSE|MGI=MGI=1096873|UniProtKB=Q64287	Irf4	Interferon regulatory factor 4;Irf4;ortholog
MOUSE|MGI=MGI=1350924|UniProtKB=P56477	Irf5	Interferon regulatory factor 5;Irf5;ortholog
MOUSE|MGI=MGI=96395|UniProtKB=P23611	Irf8	Interferon regulatory factor 8;Irf8;ortholog
MOUSE|MGI=MGI=96647|UniProtKB=P09450	Junb	Transcription factor jun-B;Junb;ortholog
MOUSE|MGI=MGI=1342287|UniProtKB=Q60793	Klf4	Krueppel-like factor 4;Klf4;ortholog
MOUSE|MGI=MGI=1338056|UniProtKB=Q9Z0Z7	Klf5	Krueppel-like factor 5;Klf5;ortholog
MOUSE|MGI=MGI=1346318|UniProtKB=O08584	Klf6	Krueppel-like factor 6;Klf6;ortholog
MOUSE|MGI=MGI=1333856|UniProtKB=O35739	Klf9	Krueppel-like factor 9;Klf9;ortholog
MOUSE|MGI=MGI=1352502|UniProtKB=Q9QXD8	Limd1	LIM domain-containing protein 1;Limd1;ortholog
MOUSE|MGI=MGI=99458|UniProtKB=Q8CFN5	Mef2c	Myocyte-specific enhancer factor 2C;Mef2c;ortholog
MOUSE|MGI=MGI=103220|UniProtKB=P32442	Meox1	Homeobox protein MOX-1;Meox1;ortholog
MOUSE|MGI=MGI=3780953|UniProtKB=D0QMC3	Mndal	Myeloid cell nuclear differentiation antigen-like protein;Mndal;ortholog
MOUSE|MGI=MGI=104987|UniProtKB=Q80US8	Mxd3	Max dimerization protein 3;Mxd3;ortholog
MOUSE|MGI=MGI=1350932|UniProtKB=Q5U4H9	Ncoa4	Nuclear receptor coactivator 4;Ncoa4;ortholog
MOUSE|MGI=MGI=1914302|UniProtKB=Q9D0F1	Ndc80	Kinetochore protein NDC80 homolog;Ndc80;ortholog
MOUSE|MGI=MGI=102469|UniProtKB=O88942	Nfatc1	Nuclear factor of activated T-cells, cytoplasmic 1;Nfatc1;ortholog
MOUSE|MGI=MGI=108420|UniProtKB=Q60795	Nfe2l2	Nuclear factor erythroid 2-related factor 2;Nfe2l2;ortholog
MOUSE|MGI=MGI=97311|UniProtKB=P70257	Nfix	Nuclear factor 1 X-type;Nfix;ortholog
MOUSE|MGI=MGI=1099800|UniProtKB=Q9WTK5	Nfkb2	Nuclear factor NF-kappa-B p100 subunit;Nfkb2;ortholog
MOUSE|MGI=MGI=97347|UniProtKB=P42586	Nkx2-2	Homeobox protein Nkx-2.2;Nkx2-2;ortholog
MOUSE|MGI=MGI=97348|UniProtKB=P97334	Nkx2-3	Homeobox protein Nkx-2.3;Nkx2-3;ortholog
MOUSE|MGI=MGI=1270158|UniProtKB=O70584	Nkx2-9	Homeobox protein Nkx-2.8;Nkx2-8;ortholog
MOUSE|MGI=MGI=1352738|UniProtKB=D3Z4R4	Nkx6-2	NK6 homeobox 2;Nkx6-2;ortholog
MOUSE|MGI=MGI=1928368|UniProtKB=O35309	Nmi	N-myc-interactor;Nmi;ortholog
MOUSE|MGI=MGI=2449205|UniProtKB=Q60674	Nr1d2	Nuclear receptor subfamily 1 group D member 2;Nr1d2;ortholog
MOUSE|MGI=MGI=1355334|UniProtKB=Q9JKN5	Olig1	Oligodendrocyte transcription factor 1;Olig1;ortholog
MOUSE|MGI=MGI=1355331|UniProtKB=Q9EQW6	Olig2	Oligodendrocyte transcription factor 2;Olig2;ortholog
MOUSE|MGI=MGI=1277134|UniProtKB=O70361	Per3	Period circadian protein homolog 3;Per3;ortholog
MOUSE|MGI=MGI=1916906|UniProtKB=Q9D711	Pir	Pirin;Pir;ortholog
MOUSE|MGI=MGI=99655|UniProtKB=Q60636	Prdm1	PR domain zinc finger protein 1;Prdm1;ortholog
MOUSE|MGI=MGI=103079|UniProtKB=P42669	Pura	Transcriptional activator protein Pur-alpha;Pura;ortholog
MOUSE|MGI=MGI=1918934|UniProtKB=Q99J64	Rbm43	RNA-binding protein 43;Rbm43;ortholog
MOUSE|MGI=MGI=1196616|UniProtKB=O08674	Rbpjl	Recombining binding protein suppressor of hairless-like protein;Rbpjl;ortholog
MOUSE|MGI=MGI=97897|UniProtKB=P15307	Rel	Proto-oncogene c-Rel;Rel;ortholog
MOUSE|MGI=MGI=103290|UniProtKB=Q04207	Rela	Transcription factor p65;Rela;ortholog
MOUSE|MGI=MGI=103289|UniProtKB=Q04863	Relb	Transcription factor RelB;Relb;ortholog
MOUSE|MGI=MGI=99852|UniProtKB=Q03347	Runx1	Runt-related transcription factor 1;Runx1;ortholog
MOUSE|MGI=MGI=107543|UniProtKB=Q61473	Sox17	Transcription factor SOX-17;Sox17;ortholog
MOUSE|MGI=MGI=103559|UniProtKB=P43680	Sox18	Transcription factor SOX-18;Sox18;ortholog
MOUSE|MGI=MGI=2153568|UniProtKB=Q8VI67	Sp7	Transcription factor Sp7;Sp7;ortholog
MOUSE|MGI=MGI=98282|UniProtKB=P17433	Spi1	Transcription factor PU.1;Spi1;ortholog
MOUSE|MGI=MGI=892986|UniProtKB=O35906	Spib	Transcription factor Spi-B;Spib;ortholog
MOUSE|MGI=MGI=1349474|UniProtKB=Q9D174	Ss18l2	SS18-like protein 2;Ss18l2;ortholog
MOUSE|MGI=MGI=103063|UniProtKB=P42225	Stat1	Signal transducer and activator of transcription 1;Stat1;ortholog
MOUSE|MGI=MGI=103038|UniProtKB=P42227	Stat3	Signal transducer and activator of transcription 3;Stat3;ortholog
MOUSE|MGI=MGI=103062|UniProtKB=P42228	Stat4	Signal transducer and activator of transcription 4;Stat4;ortholog
MOUSE|MGI=MGI=103036|UniProtKB=P42230	Stat5a	Signal transducer and activator of transcription 5A;Stat5a;ortholog
MOUSE|MGI=MGI=103034|UniProtKB=P52633	Stat6	Signal transducer and transcription activator 6;Stat6;ortholog
MOUSE|MGI=MGI=1888984|UniProtKB=Q9JKD8	Tbx21	T-box transcription factor TBX21;Tbx21;ortholog
MOUSE|MGI=MGI=98495|UniProtKB=P70324	Tbx3	T-box transcription factor TBX3;Tbx3;ortholog
MOUSE|MGI=MGI=1202715|UniProtKB=O35437	Tcf21	Transcription factor 21;Tcf21;ortholog
MOUSE|MGI=MGI=1352457|UniProtKB=Q9QZB6	Tec	Nuclear receptor subfamily 4 group A member 3;Nr4a3;ortholog
MOUSE|MGI=MGI=1194497|UniProtKB=P70284	Tgif1	Homeobox protein TGIF1;Tgif1;ortholog
MOUSE|MGI=MGI=98743|UniProtKB=P37242	Thrb	Thyroid hormone receptor beta;Thrb;ortholog
MOUSE|MGI=MGI=95806|UniProtKB=P63002	Tle5	TLE family member 5;Tle5;ortholog
MOUSE|MGI=MGI=2149593|UniProtKB=Q9WVB3	Tle6	Transducin-like enhancer protein 6;Tle6;ortholog
MOUSE|MGI=MGI=103076|UniProtKB=P48281	Vdr	Vitamin D3 receptor;Vdr;ortholog
MOUSE|MGI=MGI=1917649|UniProtKB=Q9EPK5	Wwtr1	WW domain-containing transcription regulator protein 1;Wwtr1;ortholog
MOUSE|MGI=MGI=1914307|UniProtKB=Q99LW6	Yaf2	YY1-associated factor 2;Yaf2;ortholog
MOUSE|MGI=MGI=1929213|UniProtKB=Q8K0L9	Zbtb20	Zinc finger and BTB domain-containing protein 20;Zbtb20;ortholog
MOUSE|MGI=MGI=1891838|UniProtKB=Q9JKD9	Zbtb32	Zinc finger and BTB domain-containing protein 32;Zbtb32;ortholog
MOUSE|MGI=MGI=1344407|UniProtKB=Q9R0G7	Zeb2	Zinc finger E-box-binding homeobox 2;Zeb2;ortholog
MOUSE|MGI=MGI=2442266|UniProtKB=Q0VDT2	Zfp367	Zinc finger protein 367;Znf367;ortholog
MOUSE|MGI=MGI=99199|UniProtKB=Q8BJ45	Zfp52	Zinc finger protein 52;Zfp52;ortholog
MOUSE|MGI=MGI=2670992|UniProtKB=E9PZ11	Zfp651	Zinc finger protein 651;Zfp651;ortholog
Transporter (PC00227)
MOUSE|MGI=MGI=1890216|UniProtKB=Q9JMA9	Slc6a14	Sodium- and chloride-dependent neutral and basic amino acid transporter B(0+);Slc6a14;ortholog
MOUSE|MGI=MGI=1921086|UniProtKB=Q91ZN5	Slc35b2	Adenosine 3'-phospho 5'-phosphosulfate transporter 1;Slc35b2;ortholog
MOUSE|MGI=MGI=1927073|UniProtKB=Q9JIM1	Slc29a1	Equilibrative nucleoside transporter 1;Slc29a1;ortholog
MOUSE|MGI=MGI=1931471|UniProtKB=Q9EQR4	Clca3a2	Chloride channel accessory 3A2;Clca3a2;ortholog
MOUSE|MGI=MGI=1194503|UniProtKB=Q64518	Atp2a3	Sarcoplasmic/endoplasmic reticulum calcium ATPase 3;Atp2a3;ortholog
MOUSE|MGI=MGI=893575|UniProtKB=Q9JJ00	Plscr1	Phospholipid scramblase 1;Plscr1;ortholog
MOUSE|MGI=MGI=2443383|UniProtKB=Q3USY0	Slc38a11	Putative sodium-coupled neutral amino acid transporter 11;Slc38a11;ortholog
MOUSE|MGI=MGI=105305|UniProtKB=P51912	Slc1a5	Neutral amino acid transporter B(0);Slc1a5;ortholog
MOUSE|MGI=MGI=88116|UniProtKB=P63082	Mvp	V-type proton ATPase 16 kDa proteolipid subunit;Atp6v0c;ortholog
MOUSE|MGI=MGI=2159410|UniProtKB=Q80SU6	Slc34a3	Sodium-dependent phosphate transport protein 2C;Slc34a3;ortholog
MOUSE|MGI=MGI=107678|UniProtKB=Q8C3K6	Slc5a1	Sodium/glucose cotransporter 1;Slc5a1;ortholog
MOUSE|MGI=MGI=1100521|UniProtKB=P70423	Slc7a3	Cationic amino acid transporter 3;Slc7a3;ortholog
MOUSE|MGI=MGI=1927657|UniProtKB=Q99N10	Ms4a8a	Membrane-spanning 4-domains subfamily A member 8;Ms4a8;ortholog
MOUSE|MGI=MGI=98483|UniProtKB=P21958	Tap1	Antigen peptide transporter 1;Tap1;ortholog
MOUSE|MGI=MGI=95760|UniProtKB=P28571	Slc6a9	Sodium- and chloride-dependent glycine transporter 1;Slc6a9;ortholog
MOUSE|MGI=MGI=106636|UniProtKB=Q06185	Atp5k	ATP synthase subunit e, mitochondrial;Atp5me;ortholog
MOUSE|MGI=MGI=97570|UniProtKB=P21447	Abcb4,Abcb1a	Multidrug resistance protein 1A;Abcb1a;ortholog
MOUSE|MGI=MGI=2149635|UniProtKB=Q91Y63	Slc13a3	Solute carrier family 13 member 3;Slc13a3;ortholog
MOUSE|MGI=MGI=97379|UniProtKB=O08705	Slc10a1	Sodium/bile acid cotransporter;Slc10a1;ortholog
MOUSE|MGI=MGI=99418|UniProtKB=Q9Z329	Itpr2	Inositol 1,4,5-trisphosphate receptor type 2;Itpr2;ortholog
MOUSE|MGI=MGI=1917160|UniProtKB=Q8BMD8	Slc25a24	Calcium-binding mitochondrial carrier protein SCaMC-1;Slc25a24;ortholog
MOUSE|MGI=MGI=97568|UniProtKB=P06795	Abcb1b	Multidrug resistance protein 1B;Abcb1b;ortholog
MOUSE|MGI=MGI=103156|UniProtKB=Q9R0Y8	Gabrg1	Gamma-aminobutyric acid receptor subunit gamma-1;Gabrg1;ortholog
MOUSE|MGI=MGI=2685410|UniProtKB=Q8C6V3	Tmem212	Transmembrane protein 212;Tmem212;ortholog
MOUSE|MGI=MGI=1916024|UniProtKB=Q99N07	Ms4a6d	Membrane-spanning 4-domains subfamily A member 6D;Ms4a6d;ortholog
MOUSE|MGI=MGI=1333777|UniProtKB=Q8R2N1	Aqp3	Aquaporin-3;Aqp3;ortholog
MOUSE|MGI=MGI=1923507|UniProtKB=Q9DCP2	Slc38a3	Sodium-coupled neutral amino acid transporter 3;Slc38a3;ortholog
MOUSE|MGI=MGI=1349467|UniProtKB=Q61285	Abcd2	ATP-binding cassette sub-family D member 2;Abcd2;ortholog
MOUSE|MGI=MGI=2443111|UniProtKB=E9Q236	Abcc4	ATP-binding cassette, sub-family C (CFTR/MRP), member 4;Abcc4;ortholog
MOUSE|MGI=MGI=2385183|UniProtKB=Q8R0M8	Slc16a4	Monocarboxylate transporter 5;Slc16a4;ortholog
MOUSE|MGI=MGI=1289248|UniProtKB=Q9CQM5	Txndc17	Thioredoxin domain-containing protein 17;Txndc17;ortholog
MOUSE|MGI=MGI=2139274|UniProtKB=Q5FWH7	Slc39a12	Zinc transporter ZIP12;Slc39a12;ortholog
MOUSE|MGI=MGI=3036230|UniProtKB=E9Q9W4	Slc27a6	Solute carrier family 27 (fatty acid transporter), member 6;Slc27a6;ortholog
MOUSE|MGI=MGI=1346342|UniProtKB=Q9D7Z6	Clca1	Calcium-activated chloride channel regulator 1;Clca1;ortholog
MOUSE|MGI=MGI=1913293|UniProtKB=Q9D3D9	Atp5d	ATP synthase subunit delta, mitochondrial;Atp5f1d;ortholog
MOUSE|MGI=MGI=1889679|UniProtKB=Q9ERB5	Slco1c1	Solute carrier organic anion transporter family member 1C1;Slco1c1;ortholog
MOUSE|MGI=MGI=105083|UniProtKB=P51906	Slc1a1	Excitatory amino acid transporter 3;Slc1a1;ortholog
MOUSE|MGI=MGI=2386796|UniProtKB=Q8K449	Abca9	ATP-binding cassette sub-family A member 9;Abca9;ortholog
MOUSE|MGI=MGI=1328318|UniProtKB=Q9CQD8	Atp6v0e	V-type proton ATPase subunit e 1;Atp6v0e1;ortholog
MOUSE|MGI=MGI=1891124|UniProtKB=Q9WTW2	Kcne3	Potassium voltage-gated channel subfamily E member 3;Kcne3;ortholog
MOUSE|MGI=MGI=106013|UniProtKB=P53986	Slc16a1	Monocarboxylate transporter 1;Slc16a1;ortholog
MOUSE|MGI=MGI=1350931|UniProtKB=Q9JHF5	Tcirg1	V-type proton ATPase subunit a;Tcirg1;ortholog
MOUSE|MGI=MGI=1917379|UniProtKB=Q91VA1	Slc44a4	Choline transporter-like protein 4;Slc44a4;ortholog
MOUSE|MGI=MGI=1345297|UniProtKB=Q9R0M8	Slc35a2	UDP-galactose translocator;Slc35a2;ortholog
MOUSE|MGI=MGI=2140592|UniProtKB=Q6X893	Slc44a1	Choline transporter-like protein 1;Slc44a1;ortholog
MOUSE|MGI=MGI=1346332|UniProtKB=O88870	Best1	Bestrophin-1;Best1;ortholog
MOUSE|MGI=MGI=99926|UniProtKB=P03930	mt-Atp8	ATP synthase protein 8;Mtatp8;ortholog
MOUSE|MGI=MGI=95495|UniProtKB=P20490	Ms4a1	High affinity immunoglobulin epsilon receptor subunit beta;Ms4a2;ortholog
MOUSE|MGI=MGI=2442688|UniProtKB=B1AWN4	Atp10b	Phospholipid-transporting ATPase;Atp10b;ortholog
MOUSE|MGI=MGI=1914797|UniProtKB=Q91W10	Slc39a8	Zinc transporter ZIP8;Slc39a8;ortholog
MOUSE|MGI=MGI=107497|UniProtKB=Q61835	Fxyd3	FXYD domain-containing ion transport regulator 3;Fxyd3;ortholog
MOUSE|MGI=MGI=1931307|UniProtKB=Q99PL8	Slc19a3	Thiamine transporter 2;Slc19a3;ortholog
MOUSE|MGI=MGI=1926089|UniProtKB=Q5SWY8	Slc5a10	Sodium/glucose cotransporter 5;Slc5a10;ortholog
MOUSE|MGI=MGI=1343131|UniProtKB=Q9Z0V8	Timm17a	Mitochondrial import inner membrane translocase subunit Tim17-A;Timm17a;ortholog
MOUSE|MGI=MGI=1915192|UniProtKB=P56383	Atp5g2	ATP synthase F(0) complex subunit C2, mitochondrial;Atp5mc2;ortholog
MOUSE|MGI=MGI=2384974|UniProtKB=Q91X85	Flvcr2	Feline leukemia virus subgroup C receptor-related protein 2;Flvcr2;ortholog
MOUSE|MGI=MGI=1923658|UniProtKB=B2RX12	Abcc3	Canalicular multispecific organic anion transporter 2;Abcc3;ortholog
MOUSE|MGI=MGI=1351872|UniProtKB=Q8BXB6	Slco2b1	Solute carrier organic anion transporter family member 2B1;Slco2b1;ortholog
MOUSE|MGI=MGI=107487|UniProtKB=P42925	Pmp22	Peroxisomal membrane protein 2;Pxmp2;ortholog
MOUSE|MGI=MGI=104516|UniProtKB=Q60850	Slc23a3	Solute carrier family 23 member 3;Slc23a3;ortholog
MOUSE|MGI=MGI=1315196|UniProtKB=Q9WV96	Timm10b	Mitochondrial import inner membrane translocase subunit Tim10 B;Timm10b;ortholog
MOUSE|MGI=MGI=1919316|UniProtKB=Q8K0E3	Slc5a11	Sodium/myo-inositol cotransporter 2;Slc5a11;ortholog
MOUSE|MGI=MGI=1919107|UniProtKB=Q8VCL5	Slc17a9	Solute carrier family 17 member 9;Slc17a9;ortholog
MOUSE|MGI=MGI=95751|UniProtKB=P48168	Glrb	Glycine receptor subunit beta;Glrb;ortholog
MOUSE|MGI=MGI=2679732|UniProtKB=Q8BZ00	Slc9a9	Sodium/hydrogen exchanger 9;Slc9a9;ortholog
MOUSE|MGI=MGI=88106|UniProtKB=Q6PIE5	Atp1a2	Sodium/potassium-transporting ATPase subunit alpha-2;Atp1a2;ortholog
MOUSE|MGI=MGI=1913397|UniProtKB=Q9D1J1	Necap2	Adaptin ear-binding coat-associated protein 2;Necap2;ortholog
MOUSE|MGI=MGI=1345275|UniProtKB=P41251	Slc11a1	Natural resistance-associated macrophage protein 1;Slc11a1;ortholog
MOUSE|MGI=MGI=1931054|UniProtKB=A2AVZ9	Slc43a3	Solute carrier family 43 member 3;Slc43a3;ortholog
MOUSE|MGI=MGI=2450125|UniProtKB=Q8K2X1	Atp10d	Probable phospholipid-transporting ATPase VD;Atp10d;ortholog
MOUSE|MGI=MGI=95048|UniProtKB=P21129	Slc10a3	P3 protein;Slc10a3;ortholog
MOUSE|MGI=MGI=97454|UniProtKB=Q62052	Oca2	P protein;Oca2;ortholog
MOUSE|MGI=MGI=97569|UniProtKB=P21440	Abcb4	Phosphatidylcholine translocator ABCB4;Abcb4;ortholog
MOUSE|MGI=MGI=1929691|UniProtKB=Q8BPX9	Slc15a3	Solute carrier family 15 member 3;Slc15a3;ortholog
MOUSE|MGI=MGI=1336884|UniProtKB=Q78KK3	Slc22a18	Solute carrier family 22 member 18;Slc22a18;ortholog
MOUSE|MGI=MGI=107387|UniProtKB=P55088	Aqp4	Aquaporin-4;Aqp4;ortholog
MOUSE|MGI=MGI=1922082|UniProtKB=Q8K0H7	Slc45a3	Solute carrier family 45 member 3;Slc45a3;ortholog
MOUSE|MGI=MGI=88321|UniProtKB=P19437	Ms4a1	B-lymphocyte antigen CD20;Ms4a1;ortholog
MOUSE|MGI=MGI=2681846|UniProtKB=Q8VIK2	Mpv17l2	Mpv17-like protein 2;Mpv17l2;ortholog
MOUSE|MGI=MGI=2448532|UniProtKB=Q8VC74	Cox18	Cytochrome c oxidase assembly protein COX18, mitochondrial;Cox18;ortholog
MOUSE|MGI=MGI=1915529|UniProtKB=Q8K595	Mcoln2	Mucolipin-2;Mcoln2;ortholog
MOUSE|MGI=MGI=1861729|UniProtKB=Q9JJ59	Abcb9	ATP-binding cassette sub-family B member 9;Abcb9;ortholog
MOUSE|MGI=MGI=1277957|UniProtKB=O89109	Kcnn4	Intermediate conductance calcium-activated potassium channel protein 4;Kcnn4;ortholog
MOUSE|MGI=MGI=88109|UniProtKB=P14231	Atp1b2	Sodium/potassium-transporting ATPase subunit beta-2;Atp1b2;ortholog
MOUSE|MGI=MGI=2157091|UniProtKB=Q3TH73	Ttyh2	Protein tweety homolog 2;Ttyh2;ortholog
MOUSE|MGI=MGI=1339957|UniProtKB=Q9Z1M0	P2rx7	P2X purinoceptor 7;P2rx7;ortholog
MOUSE|MGI=MGI=1923626|UniProtKB=Q14BI1	Slc24a2	Slc24a2 protein;Slc24a2;ortholog
MOUSE|MGI=MGI=1891125|UniProtKB=Q9WTW3	Kcne4	Potassium voltage-gated channel subfamily E member 4;Kcne4;ortholog
MOUSE|MGI=MGI=3607714|UniProtKB=Q8CBB2	Slc15a5	Solute carrier family 15 member 5;Slc15a5;ortholog
MOUSE|MGI=MGI=1927555|UniProtKB=O88343	Slc4a4	Electrogenic sodium bicarbonate cotransporter 1;Slc4a4;ortholog
MOUSE|MGI=MGI=95629|UniProtKB=P31649	Slc6a13	Sodium- and chloride-dependent GABA transporter 2;Slc6a13;ortholog
MOUSE|MGI=MGI=1338859|UniProtKB=Q9JJX6	P2rx4	P2X purinoceptor 4;P2rx4;ortholog
MOUSE|MGI=MGI=2135951|UniProtKB=Q99MS3	Mpv17l	Mpv17-like protein;Mpv17l;ortholog
MOUSE|MGI=MGI=1351896|UniProtKB=Q9EP96	Slco1a4	Solute carrier organic anion transporter family member 1A4;Slco1a4;ortholog
MOUSE|MGI=MGI=95630|UniProtKB=P31650	Slc6a11	Sodium- and chloride-dependent GABA transporter 3;Slc6a11;ortholog
MOUSE|MGI=MGI=1913394|UniProtKB=Q9D1K2	Atp6v1f	V-type proton ATPase subunit F;Atp6v1f;ortholog
MOUSE|MGI=MGI=1913634|UniProtKB=Q9D7A6	Srp19	Signal recognition particle 19 kDa protein;Srp19;ortholog
MOUSE|MGI=MGI=1889007|UniProtKB=Q9D3A9	Ttyh1	Protein tweety homolog 1;Ttyh1;ortholog
MOUSE|MGI=MGI=2143267|UniProtKB=P58196	Plscr4	Phospholipid scramblase 4;Plscr4;ortholog
MOUSE|MGI=MGI=1921352|UniProtKB=Q921R7	Slc35a5	Probable UDP-sugar transporter protein SLC35A5;Slc35a5;ortholog
Cytoskeletal protein (PC00085)
MOUSE|MGI=MGI=1277103|UniProtKB=Q9CQ48	Nudcd2	NudC domain-containing protein 2;Nudcd2;ortholog
MOUSE|MGI=MGI=105073|UniProtKB=Q9WUZ5	Tnni1	Troponin I, slow skeletal muscle;Tnni1;ortholog
MOUSE|MGI=MGI=87905|UniProtKB=P68033	Actc1	Actin, alpha cardiac muscle 1;Actc1;ortholog
MOUSE|MGI=MGI=1920174|UniProtKB=Q8K298	Anln	Anillin;Anln;ortholog
MOUSE|MGI=MGI=1098259|UniProtKB=P24452	Capg	Macrophage-capping protein;Capg;ortholog
MOUSE|MGI=MGI=87909|UniProtKB=P62737	Acta2	Actin, aortic smooth muscle;Acta2;ortholog
MOUSE|MGI=MGI=107743|UniProtKB=O88485	Dync1i1	Cytoplasmic dynein 1 intermediate chain 1;Dync1i1;ortholog
MOUSE|MGI=MGI=2178801|UniProtKB=Q8K1I7	Wipf1	WAS/WASL-interacting protein family member 1;Wipf1;ortholog
MOUSE|MGI=MGI=107714|UniProtKB=Q91XQ0	Dnah8	Dynein heavy chain 8, axonemal;Dnah8;ortholog
MOUSE|MGI=MGI=1098268|UniProtKB=Q61768	Kif5b	Kinesin-1 heavy chain;Kif5b;ortholog
MOUSE|MGI=MGI=1351615|UniProtKB=Q9QYB5	Add3	Gamma-adducin;Add3;ortholog
MOUSE|MGI=MGI=1922715|UniProtKB=Q9DAJ5	Dynlrb2	Dynein light chain roadblock-type 2;Dynlrb2;ortholog
MOUSE|MGI=MGI=1891830|UniProtKB=Q9QY23	Pkp3	Plakophilin-3;Pkp3;ortholog
MOUSE|MGI=MGI=104785|UniProtKB=Q64331	Myo6	Unconventional myosin-VI;Myo6;ortholog
MOUSE|MGI=MGI=104979|UniProtKB=Q08091	Cnn1	Calponin-1;Cnn1;ortholog
MOUSE|MGI=MGI=1914997|UniProtKB=Q9D4Q1	Ribc2	RIB43A-like with coiled-coils protein 2;Ribc2;ortholog
MOUSE|MGI=MGI=2158417|UniProtKB=Q14B46	Rtkn2	Rhotekin-2;Rtkn2;ortholog
MOUSE|MGI=MGI=1922813|UniProtKB=Q8BVN8	Dnali1	Axonemal dynein light intermediate polypeptide 1;Dnali1;ortholog
MOUSE|MGI=MGI=3027894|UniProtKB=Q8BYM7	Rsph4a	Radial spoke head protein 4 homolog A;Rsph4a;ortholog
MOUSE|MGI=MGI=1346523|UniProtKB=P82349	Sgcb	Beta-sarcoglycan;Sgcb;ortholog
MOUSE|MGI=MGI=2135671|UniProtKB=Q8BVA4	Lmod1	Leiomodin-1;Lmod1;ortholog
MOUSE|MGI=MGI=107371|UniProtKB=Q8C6B2	Rtkn	Rhotekin;Rtkn;ortholog
MOUSE|MGI=MGI=2683040|UniProtKB=Q8BW94	Dnah3	Dynein heavy chain 3, axonemal;Dnah3;ortholog
MOUSE|MGI=MGI=2444576|UniProtKB=Q80WE4	Kif20b	Kinesin-like protein KIF20B;Kif20b;ortholog
MOUSE|MGI=MGI=2158329|UniProtKB=Q9ERD8	Parvg	Gamma-parvin;Parvg;ortholog
MOUSE|MGI=MGI=1919069|UniProtKB=E9Q5G3	Kif23	Kinesin-like protein KIF23;Kif23;ortholog
MOUSE|MGI=MGI=1333868|UniProtKB=O88346	Tnnt1	Troponin T, slow skeletal muscle;Tnnt1;ortholog
MOUSE|MGI=MGI=1335088|UniProtKB=Q99M15	Pstpip2	Proline-serine-threonine phosphatase-interacting protein 2;Pstpip2;ortholog
MOUSE|MGI=MGI=2444679|UniProtKB=Q8K1H7	Tcp11l2	T-complex protein 11-like protein 2;Tcp11l2;ortholog
MOUSE|MGI=MGI=1929270|UniProtKB=Q9R0P5	Dstn	Destrin;Dstn;ortholog
MOUSE|MGI=MGI=1328328|UniProtKB=O88735	Map7	Ensconsin;Map7;ortholog
MOUSE|MGI=MGI=1927489|UniProtKB=Q8CI51	Pdlim5	PDZ and LIM domain protein 5;Pdlim5;ortholog
MOUSE|MGI=MGI=1352504|UniProtKB=Q9JKY5	Hip1r	Huntingtin-interacting protein 1-related protein;Hip1r;ortholog
MOUSE|MGI=MGI=1918142|UniProtKB=A4Q9F0	Ttll7	Tubulin polyglutamylase TTLL7;Ttll7;ortholog
MOUSE|MGI=MGI=2147707|UniProtKB=E9Q238	Kank1	KN motif and ankyrin repeat domains 1;Kank1;ortholog
MOUSE|MGI=MGI=1919090|UniProtKB=Q149S1	Tekt4	Tektin-4;Tekt4;ortholog
MOUSE|MGI=MGI=1342286|UniProtKB=Q9JJ28	Fli1	Protein flightless-1 homolog;Flii;ortholog
MOUSE|MGI=MGI=106612|UniProtKB=Q9WTI7	Myo1c	Unconventional myosin-Ic;Myo1c;ortholog
MOUSE|MGI=MGI=1920198|UniProtKB=Q7TQD2	Tppp	Tubulin polymerization-promoting protein;Tppp;ortholog
MOUSE|MGI=MGI=1098641|UniProtKB=Q8BH43	Wasf2	Wiskott-Aldrich syndrome protein family member 2;Wasf2;ortholog
MOUSE|MGI=MGI=106621|UniProtKB=E9Q634	Myo1e	Unconventional myosin-Ie;Myo1e;ortholog
MOUSE|MGI=MGI=1201682|UniProtKB=P97329	Kif20a	Kinesin-like protein KIF20A;Kif20a;ortholog
MOUSE|MGI=MGI=1343142|UniProtKB=Q9WV32	Arpc1b	Actin-related protein 2/3 complex subunit 1B;Arpc1b;ortholog
MOUSE|MGI=MGI=97549|UniProtKB=P62962	Pfn1	Profilin-1;Pfn1;ortholog
MOUSE|MGI=MGI=1861630|UniProtKB=Q9ET47	Espn	Espin;Espn;ortholog
MOUSE|MGI=MGI=107738|UniProtKB=Q6PDL0	Dync1li2	Cytoplasmic dynein 1 light intermediate chain 2;Dync1li2;ortholog
MOUSE|MGI=MGI=2385758|UniProtKB=Q8BL65	Ablim2	Actin-binding LIM protein 2;Ablim2;ortholog
MOUSE|MGI=MGI=1921054|UniProtKB=Q922S8	Kif2c	Kinesin-like protein KIF2C;Kif2c;ortholog
MOUSE|MGI=MGI=2443012|UniProtKB=Q5SSZ5	Tns3	Tensin-3;Tns3;ortholog
MOUSE|MGI=MGI=2147677|UniProtKB=Q99N69	Lpxn	Leupaxin;Lpxn;ortholog
MOUSE|MGI=MGI=104552|UniProtKB=E9Q0S6	Tns1	Tensin 1;Tns1;ortholog
MOUSE|MGI=MGI=88549|UniProtKB=P97315	Csrp1	Cysteine and glycine-rich protein 1;Csrp1;ortholog
MOUSE|MGI=MGI=88501|UniProtKB=P63254	Crip1	Cysteine-rich protein 1;Crip1;ortholog
MOUSE|MGI=MGI=1919369|UniProtKB=A2APB8	Tpx2	Targeting protein for Xklp2;Tpx2;ortholog
MOUSE|MGI=MGI=107848|UniProtKB=Q9D6F9	Tubb4a	Tubulin beta-4A chain;Tubb4a;ortholog
MOUSE|MGI=MGI=2144377|UniProtKB=Q8BZ33	Tns4	Tensin-4;Tns4;ortholog
MOUSE|MGI=MGI=104589|UniProtKB=P63268	Actg2	Actin, gamma-enteric smooth muscle;Actg2;ortholog
MOUSE|MGI=MGI=1098726|UniProtKB=O88662	Emp2	Epithelial membrane protein 2;Emp2;ortholog
MOUSE|MGI=MGI=1312985|UniProtKB=Q9WVA4	Tagln2	Transgelin-2;Tagln2;ortholog
MOUSE|MGI=MGI=1891410|UniProtKB=Q99JB8	Pacsin3	Protein kinase C and casein kinase II substrate protein 3;Pacsin3;ortholog
MOUSE|MGI=MGI=1202388|UniProtKB=Q60780	Gas7	Growth arrest-specific protein 7;Gas7;ortholog
MOUSE|MGI=MGI=1891705|UniProtKB=Q62082	Myl10	Myosin regulatory light chain 10;Myl10;ortholog
MOUSE|MGI=MGI=96832|UniProtKB=P19973	Lsp1	Lymphocyte-specific protein 1;Lsp1;ortholog
MOUSE|MGI=MGI=98775|UniProtKB=P49813	Tmod1	Tropomodulin-1;Tmod1;ortholog
MOUSE|MGI=MGI=95851|UniProtKB=P13020	Gsn	Gelsolin;Gsn;ortholog
MOUSE|MGI=MGI=98931|UniProtKB=P26040	Ezr	Ezrin;Ezr;ortholog
MOUSE|MGI=MGI=1861457|UniProtKB=P63168	Dynll1	Dynein light chain 1, cytoplasmic;Dynll1;ortholog
MOUSE|MGI=MGI=97269|UniProtKB=P05977	Myl1	Myosin light chain 1/3, skeletal muscle isoform;Myl1;ortholog
MOUSE|MGI=MGI=1345153|UniProtKB=Q9WVE8	Pacsin2	Protein kinase C and casein kinase substrate in neurons protein 2;Pacsin2;ortholog
MOUSE|MGI=MGI=1917676|UniProtKB=G5E8A8	Tekt5	Tektin-5;Tekt5;ortholog
MOUSE|MGI=MGI=1098729|UniProtKB=O35912	Emp3	Epithelial membrane protein 3;Emp3;ortholog
MOUSE|MGI=MGI=1921143|UniProtKB=Q80W35	Tmem202	Transmembrane protein 202;Tmem202;ortholog
MOUSE|MGI=MGI=107728|UniProtKB=Q5SYD0	Myo1d	Unconventional myosin-Id;Myo1d;ortholog
MOUSE|MGI=MGI=2147319|UniProtKB=Q8K4L3	Svil	Supervillin;Svil;ortholog
MOUSE|MGI=MGI=1890602|UniProtKB=P60521	Gabarapl2	Gamma-aminobutyric acid receptor-associated protein-like 2;Gabarapl2;ortholog
MOUSE|MGI=MGI=1098615|UniProtKB=Q9Z1P7	Kank3	KN motif and ankyrin repeat domain-containing protein 3;Kank3;ortholog
MOUSE|MGI=MGI=2447024|UniProtKB=Q99PT9	Kif19a	Kinesin-like protein KIF19;Kif19;ortholog
MOUSE|MGI=MGI=97167|UniProtKB=P26041	Msn	Moesin;Msn;ortholog
MOUSE|MGI=MGI=1914367|UniProtKB=P56387	Dynlt3	Dynein light chain Tctex-type 3;Dynlt3;ortholog
MOUSE|MGI=MGI=103072|UniProtKB=Q62523	Zyx	Zyxin;Zyx;ortholog
MOUSE|MGI=MGI=95403|UniProtKB=P54116	Stom	Erythrocyte band 7 integral membrane protein;Stom;ortholog
MOUSE|MGI=MGI=98930|UniProtKB=Q62468	Vil1	Villin-1;Vil1;ortholog
MOUSE|MGI=MGI=1915221|UniProtKB=Q9CRB6	Tppp3	Tubulin polymerization-promoting protein family member 3;Tppp3;ortholog
MOUSE|MGI=MGI=1928896|UniProtKB=Q9R0Q6	Arpc1a	Actin-related protein 2/3 complex subunit 1A;Arpc1a;ortholog
MOUSE|MGI=MGI=1915021|UniProtKB=Q9CPW4	Arpc5	Actin-related protein 2/3 complex subunit 5;Arpc5;ortholog
MOUSE|MGI=MGI=97631|UniProtKB=P16646	Pmp22	Peripheral myelin protein 22;Pmp22;ortholog
MOUSE|MGI=MGI=1095409|UniProtKB=P68373	Tuba1c	Tubulin alpha-1C chain;Tuba1c;ortholog
MOUSE|MGI=MGI=2384850|UniProtKB=Q8R1G6	Pdlim2	PDZ and LIM domain protein 2;Pdlim2;ortholog
MOUSE|MGI=MGI=2685574|UniProtKB=A2AC93	Dnaic2	Dynein intermediate chain 2, axonemal;Dnai2;ortholog
Transmembrane signal receptor (PC00197)
MOUSE|MGI=MGI=106912|UniProtKB=Q61549	Adgre1	Adhesion G protein-coupled receptor E1;Adgre1;ortholog
MOUSE|MGI=MGI=1890475|UniProtKB=Q9JHX3	Il21r	Interleukin-21 receptor;Il21r;ortholog
MOUSE|MGI=MGI=88396|UniProtKB=P12657	Chrm1	Muscarinic acetylcholine receptor M1;Chrm1;ortholog
MOUSE|MGI=MGI=1194924|UniProtKB=Q62192	Cd180	CD180 antigen;Cd180;ortholog
MOUSE|MGI=MGI=1859650|UniProtKB=Q9WUP0	Ramp2	Receptor activity-modifying protein 2;Ramp2;ortholog
MOUSE|MGI=MGI=98496|UniProtKB=P30987	Tbxa2r	Thromboxane A2 receptor;Tbxa2r;ortholog
MOUSE|MGI=MGI=105367|UniProtKB=P16382	Il4ra	Interleukin-4 receptor subunit alpha;Il4r;ortholog
MOUSE|MGI=MGI=99402|UniProtKB=Q60613	Adora2a	Adenosine receptor A2a;Adora2a;ortholog
MOUSE|MGI=MGI=104975|UniProtKB=Q61730	Il1rap	Interleukin-1 receptor accessory protein;Il1rap;ortholog
MOUSE|MGI=MGI=3525078|UniProtKB=Q80UC6	Gpr62	G-protein coupled receptor 62;Gpr62;ortholog
MOUSE|MGI=MGI=1913458|UniProtKB=Q9CQ45	Nenf	Neudesin;Nenf;ortholog
MOUSE|MGI=MGI=1349164|UniProtKB=O35988	Sdc4	Syndecan-4;Sdc4;ortholog
MOUSE|MGI=MGI=1929469|UniProtKB=Q9EQ31	Lpar3	Lysophosphatidic acid receptor 3;Lpar3;ortholog
MOUSE|MGI=MGI=1919924|UniProtKB=Q91VH1	Adipor1	Adiponectin receptor protein 1;Adipor1;ortholog
MOUSE|MGI=MGI=104774|UniProtKB=P97717	Adra1b	Alpha-1B adrenergic receptor;Adra1b;ortholog
MOUSE|MGI=MGI=96562|UniProtKB=P16872	Il7r	Interleukin-7 receptor subunit alpha;Il7r;ortholog
MOUSE|MGI=MGI=105383|UniProtKB=Q61098	Il18r1	Interleukin-18 receptor 1;Il18r1;ortholog
MOUSE|MGI=MGI=1914123|UniProtKB=Q9DBY4	Tril	TLR4 interactor with leucine rich repeats;Tril;ortholog
MOUSE|MGI=MGI=1922354|UniProtKB=Q8R189	Mmd2	Monocyte to macrophage differentiation factor 2;Mmd2;ortholog
MOUSE|MGI=MGI=2155705|UniProtKB=Q9ESG6	P2ry14	P2Y purinoceptor 14;P2ry14;ortholog
MOUSE|MGI=MGI=2684848|UniProtKB=Q5SSH8	Cyb5d2	Neuferricin;Cyb5d2;ortholog
MOUSE|MGI=MGI=1933113|UniProtKB=Q99LE2	Gpr146	Probable G-protein coupled receptor 146;Gpr146;ortholog
MOUSE|MGI=MGI=96550|UniProtKB=P16297	Il2rb	Interleukin-2 receptor subunit beta;Il2rb;ortholog
MOUSE|MGI=MGI=1918473|UniProtKB=Q0VDU3	Gpr15	G-protein coupled receptor 15;Gpr15;ortholog
MOUSE|MGI=MGI=108563|UniProtKB=P97797	Sirpa	Tyrosine-protein phosphatase non-receptor type substrate 1;Sirpa;ortholog
MOUSE|MGI=MGI=1916207|UniProtKB=Q6TCG5	Paqr6	Membrane progestin receptor delta;Paqr6;ortholog
MOUSE|MGI=MGI=2655562|UniProtKB=Q923X1	Adgrl4	Adhesion G protein-coupled receptor L4;Adgrl4;ortholog
MOUSE|MGI=MGI=1349165|UniProtKB=P43407	Sdc2	Syndecan-2;Sdc2;ortholog
MOUSE|MGI=MGI=1097680|UniProtKB=O09047	C3ar1	C3a anaphylatoxin chemotactic receptor;C3ar1;ortholog
MOUSE|MGI=MGI=1338946|UniProtKB=Q61288	Acvrl1	Serine/threonine-protein kinase receptor R3;Acvrl1;ortholog
MOUSE|MGI=MGI=1346086|UniProtKB=Q9WV08	Aplnr	Apelin receptor;Aplnr;ortholog
MOUSE|MGI=MGI=87911|UniProtKB=P37172	Tgfb1	Activin receptor type-1;Acvr1;ortholog
MOUSE|MGI=MGI=99403|UniProtKB=Q60614	Adora2b	Adenosine receptor A2b;Adora2b;ortholog
MOUSE|MGI=MGI=96545|UniProtKB=P13504	Il1r1	Interleukin-1 receptor type 1;Il1r1;ortholog
MOUSE|MGI=MGI=108018|UniProtKB=P70310	Ntsr2	Neurotensin receptor type 2;Ntsr2;ortholog
MOUSE|MGI=MGI=1916047|UniProtKB=Q6PE55	Pdgfrl	Platelet-derived growth factor receptor-like protein;Pdgfrl;ortholog
MOUSE|MGI=MGI=1338888|UniProtKB=Q9Z2B1	Il18rap	Interleukin-18 receptor accessory protein;Il18rap;ortholog
MOUSE|MGI=MGI=1346334|UniProtKB=Q9R1K6	Gpr34	Probable G-protein coupled receptor 34;Gpr34;ortholog
MOUSE|MGI=MGI=1918089|UniProtKB=Q9CPV9	P2ry12	P2Y purinoceptor 12;P2ry12;ortholog
MOUSE|MGI=MGI=1351351|UniProtKB=Q9QY96	Casr	Extracellular calcium-sensing receptor;Casr;ortholog
MOUSE|MGI=MGI=1913107|UniProtKB=Q9ERS7	Il1rl2	Interleukin-1 receptor-like 2;Il1rl2;ortholog
MOUSE|MGI=MGI=3031156|UniProtKB=Q7TQW3	Olfr1322	Olfactory receptor;Olfr1322;ortholog
MOUSE|MGI=MGI=96546|UniProtKB=P27931	Il1r2	Interleukin-1 receptor type 2;Il1r2;ortholog
MOUSE|MGI=MGI=1891250|UniProtKB=Q8BHL4	Gprc5a	Retinoic acid-induced protein 3;Gprc5a;ortholog
MOUSE|MGI=MGI=98427|UniProtKB=P14719	Il1rl1	Interleukin-1 receptor-like 1;Il1rl1;ortholog
MOUSE|MGI=MGI=1921479|UniProtKB=Q80ZE5	Paqr8	Membrane progestin receptor beta;Paqr8;ortholog
MOUSE|MGI=MGI=1919154|UniProtKB=Q80ZE4	Paqr7	Membrane progestin receptor alpha;Paqr7;ortholog
MOUSE|MGI=MGI=1926218|UniProtKB=Q99JA4	Cysltr1	Cysteinyl leukotriene receptor 1;Cysltr1;ortholog
MOUSE|MGI=MGI=2150641|UniProtKB=Q91X56	S1pr5	Sphingosine 1-phosphate receptor 5;S1pr5;ortholog
MOUSE|MGI=MGI=1917405|UniProtKB=Q8VE52	Ogfrl1	Opioid growth factor receptor-like protein 1;Ogfrl1;ortholog
MOUSE|MGI=MGI=95458|UniProtKB=P20934	Evi2a	Protein EVI2A;Evi2a;ortholog
MOUSE|MGI=MGI=97076|UniProtKB=Q08351	Mpl	Thrombopoietin receptor;Mpl;ortholog
MOUSE|MGI=MGI=108429|UniProtKB=P61793	Lpar1	Lysophosphatidic acid receptor 1;Lpar1;ortholog
MOUSE|MGI=MGI=2442013|UniProtKB=Q8BW93	C5ar2	C5a anaphylatoxin chemotactic receptor 2;C5ar2;ortholog
MOUSE|MGI=MGI=108474|UniProtKB=Q61089	Fzd6	Frizzled-6;Fzd6;ortholog
MOUSE|MGI=MGI=2685858|UniProtKB=Q80WT4	Gpr176	G-protein coupled receptor 176;Gpr176;ortholog
MOUSE|MGI=MGI=2150920|UniProtKB=Q91V87	Fgfrl1	Fibroblast growth factor receptor-like 1;Fgfrl1;ortholog
MOUSE|MGI=MGI=98729|UniProtKB=Q62312	Tgfbr2	TGF-beta receptor type-2;Tgfbr2;ortholog
MOUSE|MGI=MGI=1339365|UniProtKB=Q9Z0U9	S1pr3	Sphingosine 1-phosphate receptor 3;S1pr3;ortholog
MOUSE|MGI=MGI=1096355|UniProtKB=O08530	S1pr1	Sphingosine 1-phosphate receptor 1;S1pr1;ortholog
MOUSE|MGI=MGI=2442043|UniProtKB=Q8BG55	Gpr171	Probable G-protein coupled receptor 171;Gpr171;ortholog
MOUSE|MGI=MGI=1858418|UniProtKB=Q9WTJ5	Ramp1	Receptor activity-modifying protein 1;Ramp1;ortholog
MOUSE|MGI=MGI=1913900|UniProtKB=Q9CQ76	Nepn	Nephrocan;Nepn;ortholog
MOUSE|MGI=MGI=2148793|UniProtKB=Q91V45	Kiss1r	KiSS-1 receptor;Kiss1r;ortholog
MOUSE|MGI=MGI=1890220|UniProtKB=Q9Z282	Gpr132	Probable G-protein coupled receptor 132;Gpr132;ortholog
MOUSE|MGI=MGI=102966|UniProtKB=P70263	Ptgdr	Prostaglandin D2 receptor;Ptgdr;ortholog
MOUSE|MGI=MGI=3036284|UniProtKB=E9Q7T7	Chadl	Chondroadherin-like protein;Chadl;ortholog
MOUSE|MGI=MGI=2442298|UniProtKB=Q3URE9	Lingo2	Leucine-rich repeat and immunoglobulin-like domain-containing nogo receptor-interacting protein 2;Lingo2;ortholog
MOUSE|MGI=MGI=1344402|UniProtKB=Q9JLZ8	Sigirr	Single Ig IL-1-related receptor;Sigirr;ortholog
Scaffold/adaptor protein (PC00226)
MOUSE|MGI=MGI=1919288|UniProtKB=Q3U410	Klhl21	Kelch-like protein 21;Klhl21;ortholog
MOUSE|MGI=MGI=1919028|UniProtKB=Q6PFE1	Klhl5	Kelch-like 5;Klhl5;ortholog
MOUSE|MGI=MGI=1859635|UniProtKB=Q80VL3	Prickle3	Prickle planar cell polarity protein 3;Prickle3;ortholog
MOUSE|MGI=MGI=2139743|UniProtKB=Q91WL0	Eps8l3	Epidermal growth factor receptor kinase substrate 8-like protein 3;Eps8l3;ortholog
MOUSE|MGI=MGI=108005|UniProtKB=P22366	Myd88	Myeloid differentiation primary response protein MyD88;Myd88;ortholog
MOUSE|MGI=MGI=2140839|UniProtKB=Q8R502	Lrrc8c	Volume-regulated anion channel subunit LRRC8C;Lrrc8c;ortholog
MOUSE|MGI=MGI=1345144|UniProtKB=Q9WTP2	Spry4	Protein sprouty homolog 4;Spry4;ortholog
MOUSE|MGI=MGI=2444667|UniProtKB=Q8C7J6	Kctd12b	Potassium channel tetramerisation domain containing 12b, isoform CRA_a;Kctd12b;ortholog
MOUSE|MGI=MGI=108088|UniProtKB=Q9QYY0	Gab1	GRB2-associated-binding protein 1;Gab1;ortholog
MOUSE|MGI=MGI=87920|UniProtKB=P43883	Plin2	Perilipin-2;Plin2;ortholog
MOUSE|MGI=MGI=1925638|UniProtKB=Q9EQK5	Mvp	Major vault protein;Mvp;ortholog
MOUSE|MGI=MGI=1861354|UniProtKB=Q8R5A3	Apbb1ip	Amyloid beta A4 precursor protein-binding family B member 1-interacting protein;Apbb1ip;ortholog
MOUSE|MGI=MGI=2384307|UniProtKB=Q8K342	Rassf9	Ras association domain-containing protein 9;Rassf9;ortholog
MOUSE|MGI=MGI=108424|UniProtKB=Q60664	Lrmp	Lymphoid-restricted membrane protein;Lrmp;ortholog
MOUSE|MGI=MGI=1917114|UniProtKB=Q5NC41	1810065E05Rik	RIKEN cDNA 1810065E05 gene;1810065E05Rik;ortholog
MOUSE|MGI=MGI=101836|UniProtKB=P39428	Traf1	TNF receptor-associated factor 1;Traf1;ortholog
MOUSE|MGI=MGI=104684|UniProtKB=Q08509	Eps8	Epidermal growth factor receptor kinase substrate 8;Eps8;ortholog
MOUSE|MGI=MGI=2661416|UniProtKB=Q6PHS6	Snx13	Sorting nexin-13;Snx13;ortholog
MOUSE|MGI=MGI=2387324|UniProtKB=Q8BSM5	Gab3	GRB2-associated-binding protein 3;Gab3;ortholog
MOUSE|MGI=MGI=1924781|UniProtKB=Q8BIZ1	Anks1b	Ankyrin repeat and sterile alpha motif domain-containing protein 1B;Anks1b;ortholog
MOUSE|MGI=MGI=2448712|UniProtKB=Q8K485	Kctd11	BTB/POZ domain-containing protein KCTD11;Kctd11;ortholog
MOUSE|MGI=MGI=1926252|UniProtKB=Q9Z0G0	Gipc1	PDZ domain-containing protein GIPC1;Gipc1;ortholog
MOUSE|MGI=MGI=1925053|UniProtKB=Q9D1Y9	Shisal2b	Protein shisa-like-2B;Shisal2b;ortholog
MOUSE|MGI=MGI=2442829|UniProtKB=B1AZR0	Klhl4	Kelch-like 4;Klhl4;ortholog
MOUSE|MGI=MGI=1289234|UniProtKB=Q8BWR8	Rhpn2	Rhophilin-2;Rhpn2;ortholog
MOUSE|MGI=MGI=103177|UniProtKB=P27573	Mpz	Myelin protein P0;Mpz;ortholog
MOUSE|MGI=MGI=2386853|UniProtKB=Q8CB96	Rassf4	Ras association domain-containing protein 4;Rassf4;ortholog
MOUSE|MGI=MGI=1916956|UniProtKB=D3YY91	Lrr1	Leucine-rich repeat protein 1;Lrr1;ortholog
MOUSE|MGI=MGI=1289222|UniProtKB=A0A0U1RNG7	Kctd14	Potassium channel tetramerisation domain-containing 14;Kctd14;ortholog
MOUSE|MGI=MGI=1914766|UniProtKB=Q9D7X1	Kctd4	BTB/POZ domain-containing protein KCTD4;Kctd4;ortholog
MOUSE|MGI=MGI=1919735|UniProtKB=E9Q8Q6	Ccdc141	Coiled-coil domain-containing 141;Ccdc141;ortholog
MOUSE|MGI=MGI=2140175|UniProtKB=Q8C142	Ldlrap1	Low density lipoprotein receptor adapter protein 1;Ldlrap1;ortholog
MOUSE|MGI=MGI=2685484|UniProtKB=Q80UL9	Jaml	Junctional adhesion molecule-like;Jaml;ortholog
MOUSE|MGI=MGI=1926375|UniProtKB=Q5EBH1	Rassf5	Ras association domain-containing protein 5;Rassf5;ortholog
MOUSE|MGI=MGI=1917413|UniProtKB=Q9D7S0	Lypd8	Ly6/PLAUR domain-containing protein 8;Lypd8;ortholog
MOUSE|MGI=MGI=96878|UniProtKB=Q9QUN3	Blnk	B-cell linker protein;Blnk;ortholog
MOUSE|MGI=MGI=96534|UniProtKB=P04441	Cd74	H-2 class II histocompatibility antigen gamma chain;Cd74;ortholog
MOUSE|MGI=MGI=2145425|UniProtKB=Q8BH88	Depdc1b	DEP domain-containing protein 1B;Depdc1b;ortholog
MOUSE|MGI=MGI=1929512|UniProtKB=Q9JLJ0	Litaf	Lipopolysaccharide-induced tumor necrosis factor-alpha factor homolog;Litaf;ortholog
MOUSE|MGI=MGI=1925998|UniProtKB=Q8BL43	Rassf10	Ras association domain-containing protein 10;Rassf10;ortholog
MOUSE|MGI=MGI=1919551|UniProtKB=Q0VBP7	Shisal1	Protein shisa-like-1;Shisal1;ortholog
MOUSE|MGI=MGI=103040|UniProtKB=Q01730	Rsu1	Ras suppressor protein 1;Rsu1;ortholog
MOUSE|MGI=MGI=1315192|UniProtKB=O35125	Lrrc23	Leucine-rich repeat-containing protein 23;Lrrc23;ortholog
MOUSE|MGI=MGI=1338801|UniProtKB=Q7TMB8	Cyfip1	Cytoplasmic FMR1-interacting protein 1;Cyfip1;ortholog
MOUSE|MGI=MGI=98227|UniProtKB=P20443	Sag	S-arrestin;Sag;ortholog
MOUSE|MGI=MGI=1914707|UniProtKB=Q3UFK8	Frmd8	FERM domain-containing protein 8;Frmd8;ortholog
MOUSE|MGI=MGI=2140279|UniProtKB=Q8K1H1	Tdrd7	Tudor domain-containing protein 7;Tdrd7;ortholog
MOUSE|MGI=MGI=1321402|UniProtKB=Q60787	Lcp2	Lymphocyte cytosolic protein 2;Lcp2;ortholog
MOUSE|MGI=MGI=1914218|UniProtKB=Q8BVZ1	Plin5	Perilipin-5;Plin5;ortholog
MOUSE|MGI=MGI=1915044|UniProtKB=Q9D7I0	Shisa5	Protein shisa-5;Shisa5;ortholog
MOUSE|MGI=MGI=1914155|UniProtKB=Q9DBG5	Plin3	Perilipin-3;Plin3;ortholog
MOUSE|MGI=MGI=1913447|UniProtKB=P56390	Cks2	Cyclin-dependent kinases regulatory subunit 2;Cks2;ortholog
MOUSE|MGI=MGI=107548|UniProtKB=P70191	Traf5	TNF receptor-associated factor 5;Traf5;ortholog
MOUSE|MGI=MGI=107571|UniProtKB=Q9WVC3	Cav2	Caveolin-2;Cav2;ortholog
MOUSE|MGI=MGI=1924363|UniProtKB=Q8JZP3	Klhl2	Kelch-like protein 2;Klhl2;ortholog
MOUSE|MGI=MGI=1355324|UniProtKB=Q9JLM9	Grb14	Growth factor receptor-bound protein 14;Grb14;ortholog
MOUSE|MGI=MGI=107231|UniProtKB=Q811D0	Dlg1	Disks large homolog 1;Dlg1;ortholog
MOUSE|MGI=MGI=2442647|UniProtKB=Q3V3F6	Mpzl3	Myelin protein zero-like protein 3;Mpzl3;ortholog
MOUSE|MGI=MGI=1341909|UniProtKB=Q9JHF9	Ly96	Lymphocyte antigen 96;Ly96;ortholog
MOUSE|MGI=MGI=1916877|UniProtKB=Q14BJ1	Fam89a	Protein FAM89A;Fam89a;ortholog
MOUSE|MGI=MGI=1924802|UniProtKB=Q8CA71	Shisa4	Protein shisa-4;Shisa4;ortholog
MOUSE|MGI=MGI=1351468|UniProtKB=Q9QZE2	Clnk	Cytokine-dependent hematopoietic cell linker;Clnk;ortholog
MOUSE|MGI=MGI=2179722|UniProtKB=Q99P51	Rassf3	Ras association domain-containing protein 3;Rassf3;ortholog
MOUSE|MGI=MGI=102709|UniProtKB=P49817	Cav1	Caveolin-1;Cav1;ortholog
Membrane traffic protein (PC00150)
MOUSE|MGI=MGI=1277968|UniProtKB=O54724	Cavin1	Caveolae-associated protein 1;Cavin1;ortholog
MOUSE|MGI=MGI=1298382|UniProtKB=Q9R1Q7	Plp2	Proteolipid protein 2;Plp2;ortholog
MOUSE|MGI=MGI=109356|UniProtKB=O09044	Snap23	Synaptosomal-associated protein 23;Snap23;ortholog
MOUSE|MGI=MGI=1343104|UniProtKB=O35623	Bet1	BET1 homolog;Bet1;ortholog
MOUSE|MGI=MGI=108059|UniProtKB=Q00262	Stx2	Syntaxin-2;Stx2;ortholog
MOUSE|MGI=MGI=2147570|UniProtKB=Q7TQJ1	Marveld1	MARVEL domain-containing protein 1;Marveld1;ortholog
MOUSE|MGI=MGI=1921575|UniProtKB=Q6IRU5	Cltb	Clathrin light chain B;Cltb;ortholog
MOUSE|MGI=MGI=107537|UniProtKB=Q61124	Cln3	Battenin;Cln3;ortholog
MOUSE|MGI=MGI=2385729|UniProtKB=A9XX86	Mgl2	MCG21506;Mgl2;ortholog
MOUSE|MGI=MGI=1328324|UniProtKB=O55101	Syngr2	Synaptogyrin-2;Syngr2;ortholog
MOUSE|MGI=MGI=102682|UniProtKB=Q80Y17	Llgl1	Lethal(2) giant larvae protein homolog 1;Llgl1;ortholog
MOUSE|MGI=MGI=1889383|UniProtKB=Q9DB50	Ap1s2	AP-1 complex subunit sigma-2;Ap1s2;ortholog
MOUSE|MGI=MGI=104583|UniProtKB=P42567	Eps15	Epidermal growth factor receptor substrate 15;Eps15;ortholog
MOUSE|MGI=MGI=1913710|UniProtKB=Q78S06	Sys1	Protein SYS1 homolog;Sys1;ortholog
MOUSE|MGI=MGI=1277120|UniProtKB=G5E8V9	Arfip1	ADP-ribosylation factor-interacting protein 1;Arfip1;ortholog
MOUSE|MGI=MGI=96745|UniProtKB=P11438	Lamp1	Lysosome-associated membrane glycoprotein 1;Lamp1;ortholog
MOUSE|MGI=MGI=1913476|UniProtKB=Q9CQP2	Trappc2	Trafficking protein particle complex subunit 2;Trappc2;ortholog
MOUSE|MGI=MGI=1913361|UniProtKB=Q78IS1	Tmed3	Transmembrane emp24 domain-containing protein 3;Tmed3;ortholog
MOUSE|MGI=MGI=109547|UniProtKB=P39054	Dnm2	Dynamin-2;Dnm2;ortholog
MOUSE|MGI=MGI=1916203|UniProtKB=Q9DB34	Chmp2a	Charged multivesicular body protein 2a;Chmp2a;ortholog
MOUSE|MGI=MGI=1921586|UniProtKB=Q9CXE7	Tmed5	Transmembrane emp24 domain-containing protein 5;Tmed5;ortholog
MOUSE|MGI=MGI=1202296|UniProtKB=O88307	Sorl1	Sortilin-related receptor;Sorl1;ortholog
MOUSE|MGI=MGI=2447162|UniProtKB=Q99LJ5	Cmtm3	CKLF-like MARVEL transmembrane domain-containing protein 3;Cmtm3;ortholog
MOUSE|MGI=MGI=2388267|UniProtKB=Q8CHW5	Bicdl2	BICD family-like cargo adapter 2;Bicdl2;ortholog
MOUSE|MGI=MGI=1338049|UniProtKB=Q9Z0R6	Itsn2	Intersectin-2;Itsn2;ortholog
MOUSE|MGI=MGI=2178742|UniProtKB=Q8R4Y4	Stab1	Stabilin-1;Stab1;ortholog
MOUSE|MGI=MGI=99513|UniProtKB=Q63918	Cavin2	Caveolae-associated protein 2;Cavin2;ortholog
MOUSE|MGI=MGI=2385152|UniProtKB=Q91X49	Mall	MAL-like protein;Mall;ortholog
MOUSE|MGI=MGI=1916672|UniProtKB=Q8C437	Pex5l	PEX5-related protein;Pex5l;ortholog
MOUSE|MGI=MGI=88342|UniProtKB=P31996	Cd68	Macrosialin;Cd68;ortholog
MOUSE|MGI=MGI=1201692|UniProtKB=Q9Z0S9	Rabac1	Prenylated Rab acceptor protein 1;Rabac1;ortholog
MOUSE|MGI=MGI=1919192|UniProtKB=Q69ZN7	Myof	Myoferlin;Myof;ortholog
MOUSE|MGI=MGI=1922708|UniProtKB=Q9DAS1	Cklf	Chemokine-like factor;Cklf;ortholog
MOUSE|MGI=MGI=2443609|UniProtKB=Q14B98	Pheta2	Sesquipedalian-2;Pheta2;ortholog
MOUSE|MGI=MGI=2384963|UniProtKB=Q8R3T5	Stxbp6	Syntaxin-binding protein 6;Stxbp6;ortholog
MOUSE|MGI=MGI=892970|UniProtKB=O09198	Mal	Myelin and lymphocyte protein;Mal;ortholog
MOUSE|MGI=MGI=1919799|UniProtKB=Q8K072	Reep4	Receptor expression-enhancing protein 4;Reep4;ortholog
MOUSE|MGI=MGI=1336974|UniProtKB=Q9WVP1	Ap1m2	AP-1 complex subunit mu-2;Ap1m2;ortholog
MOUSE|MGI=MGI=96748|UniProtKB=P17047	Lamp2	Lysosome-associated membrane glycoprotein 2;Lamp2;ortholog
MOUSE|Ensembl=ENSMUSG00000102805|UniProtKB=E9QAY5	Gm37240	Predicted gene, 37240;Gm37240;ortholog
MOUSE|MGI=MGI=108081|UniProtKB=O09117	Sypl	Synaptophysin-like protein 1;Sypl1;ortholog
MOUSE|MGI=MGI=1918077|UniProtKB=Q6P9N8	Trak2	Trafficking protein, kinesin-binding 2;Trak2;ortholog
MOUSE|MGI=MGI=893578|UniProtKB=Q61009	Scarb1	Scavenger receptor class B member 1;Scarb1;ortholog
MOUSE|MGI=MGI=107370|UniProtKB=Q64324	Stxbp2	Syntaxin-binding protein 2;Stxbp2;ortholog
MOUSE|MGI=MGI=1861231|UniProtKB=Q9JKF4	Clec4n	C-type lectin domain family 6 member A;Clec6a;ortholog
MOUSE|MGI=MGI=1351611|UniProtKB=Q8R313	Exoc6	Exocyst complex component 6;Exoc6;ortholog
MOUSE|MGI=MGI=97244|UniProtKB=Q9WVP9	Mx2	Interferon-induced GTP-binding protein Mx2;Mx2;ortholog
MOUSE|MGI=MGI=2447164|UniProtKB=Q9D6G9	Cmtm5	CKLF-like MARVEL transmembrane domain-containing protein 5;Cmtm5;ortholog
MOUSE|MGI=MGI=88930|UniProtKB=Q99KK1	Reep3	Receptor expression-enhancing protein 3;Reep3;ortholog
MOUSE|MGI=MGI=1916295|UniProtKB=Q9JME7	Trappc2l	Trafficking protein particle complex subunit 2-like protein;Trappc2l;ortholog
MOUSE|MGI=MGI=1923422|UniProtKB=Q91VJ2	Cavin3	Caveolae-associated protein 3;Cavin3;ortholog
MOUSE|MGI=MGI=1915051|UniProtKB=Q9DCU2	Pllp	Plasmolipin;Pllp;ortholog
MOUSE|MGI=MGI=2449455|UniProtKB=Q5ND28	Scarf1	Scavenger receptor class F member 1;Scarf1;ortholog
MOUSE|MGI=MGI=107362|UniProtKB=Q60770	Stxbp3	Syntaxin-binding protein 3;Stxbp3;ortholog
MOUSE|MGI=MGI=88140|UniProtKB=Q9Z2F6	Bcl3	B-cell lymphoma 3 protein homolog;Bcl3;ortholog
MOUSE|MGI=MGI=1919619|UniProtKB=Q9EQP2	Ehd4	EH domain-containing protein 4;Ehd4;ortholog
MOUSE|MGI=MGI=2159614|UniProtKB=Q91ZV0	Mia2	Melanoma inhibitory activity protein 2;Mia2;ortholog
MOUSE|MGI=MGI=893577|UniProtKB=P70452	Stx4a	Syntaxin-4;Stx4;ortholog
MOUSE|MGI=MGI=2447165|UniProtKB=Q9CZ69	Cmtm6	CKLF-like MARVEL transmembrane domain-containing protein 6;Cmtm6;ortholog
MOUSE|MGI=MGI=1350933|UniProtKB=Q61335	Bcap31	B-cell receptor-associated protein 31;Bcap31;ortholog
MOUSE|MGI=MGI=1924209|UniProtKB=Q9D7S9	Chmp5	Charged multivesicular body protein 5;Chmp5;ortholog
MOUSE|MGI=MGI=1194908|UniProtKB=O54910	Nfkbie	NF-kappa-B inhibitor epsilon;Nfkbie;ortholog
Intercellular signal molecule (PC00207)
MOUSE|MGI=MGI=98955|UniProtKB=P17553	Wnt3	Proto-oncogene Wnt-3;Wnt3;ortholog
MOUSE|MGI=MGI=97804|UniProtKB=P63089	Ptn	Pleiotrophin;Ptn;ortholog
MOUSE|MGI=MGI=108417|UniProtKB=P97463	Nrtn	Neurturin;Nrtn;ortholog
MOUSE|MGI=MGI=98389|UniProtKB=P10923	Spp1	Osteopontin;Spp1;ortholog
MOUSE|MGI=MGI=95515|UniProtKB=P61148	Fgf1	Fibroblast growth factor 1;Fgf1;ortholog
MOUSE|MGI=MGI=99924|UniProtKB=Q9EPS2	Pyy	Peptide YY;Pyy;ortholog
MOUSE|MGI=MGI=95560|UniProtKB=P49772	Flt3l	Fms-related tyrosine kinase 3 ligand;Flt3lg;ortholog
MOUSE|MGI=MGI=104638|UniProtKB=Q62395	Tff3,Mitf	Trefoil factor 3;Tff3;ortholog
MOUSE|MGI=MGI=98724|UniProtKB=P48030	Tgfa	Protransforming growth factor alpha;Tgfa;ortholog
MOUSE|MGI=MGI=98262|UniProtKB=P30882	Ccl5	C-C motif chemokine 5;Ccl5;ortholog
MOUSE|MGI=MGI=98259|UniProtKB=P10148	Ccl2	C-C motif chemokine 2;Ccl2;ortholog
MOUSE|MGI=MGI=102707|UniProtKB=P52801	Elf1	Ephrin-A2;Efna2;ortholog
MOUSE|MGI=MGI=97369|UniProtKB=Q61839	Cnp	C-type natriuretic peptide;Nppc;ortholog
MOUSE|MGI=MGI=107405|UniProtKB=Q64280	Lefty1	Left-right determination factor 1;Lefty1;ortholog
MOUSE|MGI=MGI=95516|UniProtKB=P15655	Fgf2	Fibroblast growth factor 2;Fgf2;ortholog
MOUSE|MGI=MGI=102795|UniProtKB=Q71KU9	Fgl1	Fibrinogen-like protein 1;Fgl1;ortholog
MOUSE|MGI=MGI=104579|UniProtKB=Q60837	Il12rb1	Interleukin-12 receptor subunit beta-1;Il12rb1;ortholog
MOUSE|MGI=MGI=1340905|UniProtKB=O70165	Fcna	Ficolin-1;Fcn1;ortholog
MOUSE|MGI=MGI=104540|UniProtKB=P43025	Clec3b	Tetranectin;Clec3b;ortholog
MOUSE|MGI=MGI=88177|UniProtKB=P21274	Bmp2	Bone morphogenetic protein 2;Bmp2;ortholog
MOUSE|MGI=MGI=1339755|UniProtKB=P40223	Csf3r	Granulocyte colony-stimulating factor receptor;Csf3r;ortholog
MOUSE|MGI=MGI=1346047|UniProtKB=Q9Z0J7	Gdf15	Growth/differentiation factor 15;Gdf15;ortholog
MOUSE|MGI=MGI=1932410|UniProtKB=Q9EQ14	Il23a	Interleukin-23 subunit alpha;Il23a;ortholog
MOUSE|MGI=MGI=103266|UniProtKB=P12804	Fgl2	Fibroleukin;Fgl2;ortholog
MOUSE|MGI=MGI=98260|UniProtKB=P10855	Ccl3	C-C motif chemokine 3;Ccl3;ortholog
MOUSE|MGI=MGI=1277954|UniProtKB=O88786	Il13ra2	Interleukin-13 receptor subunit alpha-2;Il13ra2;ortholog
MOUSE|MGI=MGI=1860118|UniProtKB=Q8BH34	Sema3d	Semaphorin-3D;Sema3d;ortholog
MOUSE|MGI=MGI=1352450|UniProtKB=P17515	Cxcl10	C-X-C motif chemokine 10;Cxcl10;ortholog
MOUSE|MGI=MGI=2449923|UniProtKB=Q9QXT5	Egfl7	Epidermal growth factor-like protein 7;Egfl7;ortholog
MOUSE|MGI=MGI=97321|UniProtKB=P01139	Ngf	Beta-nerve growth factor;Ngf;ortholog
MOUSE|MGI=MGI=1913292|UniProtKB=Q9CQN4	Sostdc1	Sclerostin domain-containing protein 1;Sostdc1;ortholog
MOUSE|MGI=MGI=1914362|UniProtKB=Q9ESS2	Fgf22	Fibroblast growth factor 22;Fgf22;ortholog
MOUSE|MGI=MGI=98725|UniProtKB=P04202	Tgfb1	Transforming growth factor beta-1 proprotein;Tgfb1;ortholog
MOUSE|MGI=MGI=1336887|UniProtKB=Q9WVH6	Angpt4	Angiopoietin-4;Angpt4;ortholog
MOUSE|MGI=MGI=1932682|UniProtKB=Q8BSU2	Cxcl16	C-X-C motif chemokine 16;Cxcl16;ortholog
MOUSE|MGI=MGI=108058|UniProtKB=P97297	Adm	ADM;Adm;ortholog
MOUSE|MGI=MGI=98261|UniProtKB=P14097	Ccl4	C-C motif chemokine 4;Ccl4;ortholog
MOUSE|MGI=MGI=105932|UniProtKB=P55104	Inhbc	Inhibin beta C chain;Inhbc;ortholog
MOUSE|MGI=MGI=96551|UniProtKB=P34902	Il2rg	Cytokine receptor common subunit gamma;Il2rg;ortholog
MOUSE|MGI=MGI=88496|UniProtKB=Q8CIT0	Crh	Corticoliberin;Crh;ortholog
MOUSE|MGI=MGI=1351595|UniProtKB=Q9QY05	Insl6	Insulin-like peptide INSL6;Insl6;ortholog
MOUSE|MGI=MGI=88068|UniProtKB=P31955	Areg	Amphiregulin;Areg;ortholog
MOUSE|MGI=MGI=96558|UniProtKB=P21183	Il5ra	Interleukin-5 receptor subunit alpha;Il5ra;ortholog
MOUSE|MGI=MGI=96382|UniProtKB=P12968	Dap	Islet amyloid polypeptide;Iapp;ortholog
MOUSE|MGI=MGI=1354171|UniProtKB=O35228	Ebi3	Interleukin-27 subunit beta;Ebi3;ortholog
MOUSE|MGI=MGI=97527|UniProtKB=P20033	Pdgfa	Platelet-derived growth factor subunit A;Pdgfa;ortholog
MOUSE|MGI=MGI=97528|UniProtKB=P31240	Pdgfb,Sis	Platelet-derived growth factor subunit B;Pdgfb;ortholog
MOUSE|MGI=MGI=105052|UniProtKB=O09030	Il13ra1	Interleukin-13 receptor subunit alpha-1;Il13ra1;ortholog
MOUSE|MGI=MGI=109244|UniProtKB=O09126	Sema4d	Semaphorin-4D;Sema4d;ortholog
MOUSE|MGI=MGI=108068|UniProtKB=P12850	Cxcl1	Growth-regulated alpha protein;Cxcl1;ortholog
Nucleic acid binding protein (PC00171)
MOUSE|MGI=MGI=1913500|UniProtKB=P61216	Taf13	Transcription initiation factor TFIID subunit 13;Taf13;ortholog
MOUSE|MGI=MGI=1931526|UniProtKB=P15864	H1f2	Histone H1.2;Hist1h1c;ortholog
MOUSE|MGI=MGI=1917326|UniProtKB=Q3US41	Esrp1	Epithelial splicing regulatory protein 1;Esrp1;ortholog
MOUSE|MGI=MGI=2442530|UniProtKB=Q8BQJ6	Trmt2b	tRNA (uracil(54)-C(5))-methyltransferase homolog;Trmt2b;ortholog
MOUSE|MGI=MGI=2442836|UniProtKB=Q5SXJ3	Brip1	Fanconi anemia group J protein homolog;Brip1;ortholog
MOUSE|MGI=MGI=1916924|UniProtKB=Q3UBZ5	Mif4gd	MIF4G domain-containing protein;Mif4gd;ortholog
MOUSE|MGI=MGI=1928482|UniProtKB=Q9JKP5	Mbnl1	Muscleblind-like protein 1;Mbnl1;ortholog
MOUSE|MGI=MGI=2448409|UniProtKB=Q8CGP2	Hist1h2bp	Histone H2B type 1-P;Hist1h2bp;ortholog
MOUSE|MGI=MGI=1329019|UniProtKB=P56542	Dnase2a	Deoxyribonuclease-2-alpha;Dnase2;ortholog
MOUSE|MGI=MGI=2448300|UniProtKB=C0HKE7	Hist1h2an	Histone H2A type 1-N;Hist1h2an;ortholog
MOUSE|MGI=MGI=105126|UniProtKB=P54726	Rad23a	UV excision repair protein RAD23 homolog A;Rad23a;ortholog
MOUSE|MGI=MGI=102725|UniProtKB=Q63871	Polr2k	DNA-directed RNA polymerases I, II, and III subunit RPABC4;Polr2k;ortholog
MOUSE|MGI=MGI=103298|UniProtKB=P51908	Apobec1	C-U-editing enzyme APOBEC-1;Apobec1;ortholog
MOUSE|MGI=MGI=1923258|UniProtKB=Q8BGW5	Nabp1	SOSS complex subunit B2;Nabp1;ortholog
MOUSE|MGI=MGI=2384588|UniProtKB=Q8K203	Neil3	Endonuclease 8-like 3;Neil3;ortholog
MOUSE|MGI=MGI=1922038|UniProtKB=Q58FA4	E2f8	Transcription factor E2F8;E2f8;ortholog
MOUSE|MGI=MGI=3606192|UniProtKB=Q8R1M2	H2aj	Histone H2A.J;H2afj;ortholog
MOUSE|MGI=MGI=1924340|UniProtKB=Q8VCR9	Ocel1	Occludin/ELL domain-containing protein 1;Ocel1;ortholog
MOUSE|MGI=MGI=2384294|UniProtKB=Q91WT8	Rbm47	RNA-binding protein 47;Rbm47;ortholog
MOUSE|MGI=MGI=1916995|UniProtKB=Q9CWP8	Pold4	DNA polymerase delta subunit 4;Pold4;ortholog
MOUSE|MGI=MGI=1931527|UniProtKB=P43274	H1f4	Histone H1.4;Hist1h1e;ortholog
MOUSE|MGI=MGI=1346320|UniProtKB=Q8K0H5	Taf10	Transcription initiation factor TFIID subunit 10;Taf10;ortholog
MOUSE|MGI=MGI=2676627|UniProtKB=P60322	Nos2	Nanos homolog 2;Nanos2;ortholog
MOUSE|MGI=MGI=107945|UniProtKB=P23949	Zfp36l2	mRNA decay activator protein ZFP36L2;Zfp36l2;ortholog
MOUSE|MGI=MGI=2183438|UniProtKB=Q3UKU1	Ell2	RNA polymerase II elongation factor ELL2;Ell2;ortholog
MOUSE|MGI=MGI=1334446|UniProtKB=Q9WVB0	Rbpms	RNA-binding protein with multiple splicing;Rbpms;ortholog
MOUSE|MGI=MGI=1933111|UniProtKB=Q99J72	Apobec3	DNA dC-dU-editing enzyme APOBEC-3;Apobec3;ortholog
MOUSE|MGI=MGI=3045313|UniProtKB=Q8BIY3	Zc3h12d	Probable ribonuclease ZC3H12D;Zc3h12d;ortholog
MOUSE|MGI=MGI=107169|UniProtKB=P16254	Srp14	Signal recognition particle 14 kDa protein;Srp14;ortholog
MOUSE|MGI=MGI=2145597|UniProtKB=Q8C181	Mbnl2	Muscleblind-like protein 2;Mbnl2;ortholog
MOUSE|MGI=MGI=1913961|UniProtKB=P70122	Sbds	Ribosome maturation protein SBDS;Sbds;ortholog
MOUSE|MGI=MGI=1914807|UniProtKB=Q8BN59	Larp6	La-related protein 6;Larp6;ortholog
MOUSE|MGI=MGI=1341890|UniProtKB=O88532	Zfr	Zinc finger RNA-binding protein;Zfr;ortholog
MOUSE|MGI=MGI=2447763|UniProtKB=Q6VY05	Dnd1	Dead end protein homolog 1;Dnd1;ortholog
MOUSE|MGI=MGI=1345150|UniProtKB=O89033	Cdc6	Cell division control protein 6 homolog;Cdc6;ortholog
MOUSE|MGI=MGI=1914736|UniProtKB=Q6NXY9	Polr3g	DNA-directed RNA polymerase III subunit RPC7;Polr3g;ortholog
MOUSE|MGI=MGI=2138741|UniProtKB=Q9Z2X1	Hnrnpf	Heterogeneous nuclear ribonucleoprotein F;Hnrnpf;ortholog
MOUSE|MGI=MGI=99180|UniProtKB=P22893	Zfp36	mRNA decay activator protein ZFP36;Zfp36;ortholog
MOUSE|MGI=MGI=1913623|UniProtKB=P62322	Lsm5	U6 snRNA-associated Sm-like protein LSm5;Lsm5;ortholog
MOUSE|MGI=MGI=2444912|UniProtKB=Q8R003	Mbnl3	Muscleblind-like protein 3;Mbnl3;ortholog
MOUSE|MGI=MGI=1925554|UniProtKB=Q9D2U5	Naa38	N-alpha-acetyltransferase 38, NatC auxiliary subunit;Naa38;ortholog
MOUSE|MGI=MGI=106183|UniProtKB=Q61146	Ocln	Occludin;Ocln;ortholog
MOUSE|MGI=MGI=3648476|UniProtKB=B4XVP9	Phf11c	PHD finger protein 11C;Phf11c;ortholog
MOUSE|MGI=MGI=1920916|UniProtKB=Q8VE80	Thoc3	THO complex subunit 3;Thoc3;ortholog
MOUSE|MGI=MGI=97054|UniProtKB=P23249	Mov10	Putative helicase MOV-10;Mov10;ortholog
MOUSE|MGI=MGI=1914097|UniProtKB=Q9CPS6	Hint3	Histidine triad nucleotide-binding protein 3;Hint3;ortholog
MOUSE|MGI=MGI=1347064|UniProtKB=Q9CQ39	Med21	Mediator of RNA polymerase II transcription subunit 21;Med21;ortholog
MOUSE|MGI=MGI=2447622|UniProtKB=Q80YT9	Rbm11	Splicing regulator RBM11;Rbm11;ortholog
Defense/immunity protein (PC00090)
MOUSE|MGI=MGI=1195970|UniProtKB=F8VQ94	Pira2	Paired-Ig-like receptor A2;Pira2;ortholog
MOUSE|MGI=MGI=88334|UniProtKB=P24161	Cd247	T-cell surface glycoprotein CD3 zeta chain;Cd247;ortholog
MOUSE|MGI=MGI=95901|UniProtKB=P04230	H2-Eb1	H-2 class II histocompatibility antigen, E-B beta chain;H2-Eb1;ortholog
MOUSE|MGI=MGI=1201689|UniProtKB=Q9R233	Tapbp	Tapasin;Tapbp;ortholog
MOUSE|MGI=MGI=1933397|UniProtKB=Q9EQY5	Fcrls	Fc receptor-like S, scavenger receptor;Fcrls;ortholog
MOUSE|MGI=MGI=1336885|UniProtKB=Q18PI6	Cd84	SLAM family member 5;Cd84;ortholog
MOUSE|MGI=MGI=2384853|UniProtKB=Q8VD31	Tapbpl	Tapasin-related protein;Tapbpl;ortholog
MOUSE|MGI=MGI=1920940|UniProtKB=Q9CWG1	Glipr1	Glioma pathogenesis-related protein 1;Glipr1;ortholog
MOUSE|MGI=MGI=88327|UniProtKB=P31041	Cd28	T-cell-specific surface glycoprotein CD28;Cd28;ortholog
MOUSE|MGI=MGI=2444633|UniProtKB=T1NXB5	Vstm4	V-set and transmembrane domain-containing protein 4;Vstm4;ortholog
MOUSE|MGI=MGI=97435|UniProtKB=Q61885	Mog	Myelin-oligodendrocyte glycoprotein;Mog;ortholog
MOUSE|MGI=MGI=103070|UniProtKB=P01921	H2-Ab1	H-2 class II histocompatibility antigen, A-D beta chain;H2-Ab1;ortholog
MOUSE|MGI=MGI=95498|UniProtKB=P26151	Fcgr1	High affinity immunoglobulin gamma Fc receptor I;Fcgr1;ortholog
MOUSE|MGI=MGI=96885|UniProtKB=Q01965	Ly9	T-lymphocyte surface antigen Ly-9;Ly9;ortholog
MOUSE|MGI=MGI=97537|UniProtKB=Q08481	Pecam1	Platelet endothelial cell adhesion molecule;Pecam1;ortholog
MOUSE|MGI=MGI=107892|UniProtKB=Q91VU0	Fam3c	Protein FAM3C;Fam3c;ortholog
MOUSE|MGI=MGI=1922595|UniProtKB=Q8BHK6	Slamf7	SLAM family member 7;Slamf7;ortholog
MOUSE|MGI=MGI=95924|UniProtKB=Q9QWV1	H2-Oa	H2-O alpha;H2-Oa;ortholog
MOUSE|MGI=MGI=1336212|UniProtKB=Q8C567	Ncr1	Natural cytotoxicity triggering receptor 1;Ncr1;ortholog
MOUSE|MGI=MGI=105492|UniProtKB=Q8BG84	Lair1	Leukocyte-associated immunoglobulin-like receptor 1;Lair1;ortholog
MOUSE|MGI=MGI=2138647|UniProtKB=Q920A9	Fcrla	Fc receptor-like A;Fcrla;ortholog
MOUSE|MGI=MGI=95895|UniProtKB=P01910	H2-Aa	H-2 class II histocompatibility antigen, A-K alpha chain;H2-Aa;ortholog
MOUSE|MGI=MGI=1201784|UniProtKB=P97805	Oit1	Protein FAM3D;Fam3d;ortholog
MOUSE|MGI=MGI=1934659|UniProtKB=Q8BS03	Pi15	Peptidase inhibitor 15;Pi15;ortholog
MOUSE|MGI=MGI=96825|UniProtKB=P17563	Selenbp1	Methanethiol oxidase;Selenbp1;ortholog
MOUSE|MGI=MGI=1353620|UniProtKB=Q9ET39	Slamf6	SLAM family member 6;Slamf6;ortholog
MOUSE|MGI=MGI=88127|UniProtKB=P01887	B2m	Beta-2-microglobulin;B2m;ortholog
MOUSE|MGI=MGI=1920177|UniProtKB=Q640R3	Hepacam	Hepatocyte cell adhesion molecule;Hepacam;ortholog
MOUSE|MGI=MGI=1926446|UniProtKB=Q9EP73	Cd274	Programmed cell death 1 ligand 1;Cd274;ortholog
MOUSE|MGI=MGI=2442439|UniProtKB=Q8BJE2	Btnl9	Butyrophilin-like protein 9;Btnl9;ortholog
MOUSE|MGI=MGI=95923|UniProtKB=Q31099	H2-DMb2	H2-M beta 2;H2-DMb2;ortholog
MOUSE|MGI=MGI=101773|UniProtKB=P42082	Cd86	T-lymphocyte activation antigen CD86;Cd86;ortholog
MOUSE|MGI=MGI=96431|UniProtKB=P15530	Cd79b	B-cell antigen receptor complex-associated protein beta chain;Cd79b;ortholog
MOUSE|MGI=MGI=95921|UniProtKB=P28078	H2-DMa	Class II histocompatibility antigen, M alpha chain;H2-DMa;ortholog
MOUSE|MGI=MGI=101774|UniProtKB=P11911	Cd79a	B-cell antigen receptor complex-associated protein alpha chain;Cd79a;ortholog
MOUSE|MGI=MGI=2443362|UniProtKB=Q8BHB3	Lax1	Lymphocyte transmembrane adapter 1;Lax1;ortholog
MOUSE|MGI=MGI=95925|UniProtKB=O35424	H2-Ob	Histocompatibility 2, O region beta locus;H2-Ob;ortholog
MOUSE|MGI=MGI=88320|UniProtKB=P08920	Cd2	T-cell surface antigen CD2;Cd2;ortholog
MOUSE|MGI=MGI=1351314|UniProtKB=Q9QUM4	Slamf1	Signaling lymphocytic activation molecule;Slamf1;ortholog
MOUSE|MGI=MGI=88339|UniProtKB=P18181	Cd48	CD48 antigen;Cd48;ortholog
MOUSE|MGI=MGI=1923692|UniProtKB=Q9D780	Slamf9	SLAM family member 9;Slamf9;ortholog
Extracellular matrix protein (PC00102)
MOUSE|MGI=MGI=1858212|UniProtKB=Q9JLI2	Col5a3	Collagen type V alpha 3 chain;Col5a3;ortholog
MOUSE|MGI=MGI=96777|UniProtKB=P16045	Lgals1	Galectin-1;Lgals1;ortholog
MOUSE|MGI=MGI=103294|UniProtKB=Q61878	Mbp,Prg2	Bone marrow proteoglycan;Prg2;ortholog
MOUSE|MGI=MGI=88460|UniProtKB=Q02788	Col6a2	Collagen alpha-2(VI) chain;Col6a2;ortholog
MOUSE|MGI=MGI=109613|UniProtKB=O08746	Matn2	Matrilin-2;Matn2;ortholog
MOUSE|MGI=MGI=1095396|UniProtKB=Q8BLX7	Col16a1	Collagen alpha-1(XVI) chain;Col16a1;ortholog
MOUSE|MGI=MGI=88459|UniProtKB=Q04857	Col6a1	Collagen alpha-1(VI) chain;Col6a1;ortholog
MOUSE|MGI=MGI=88465|UniProtKB=Q05722	Col9a1	Collagen alpha-1(IX) chain;Col9a1;ortholog
MOUSE|MGI=MGI=1920152|UniProtKB=Q8BKV0	Spock3	Testican-3;Spock3;ortholog
MOUSE|MGI=MGI=95488|UniProtKB=P37889	Fbln2	Fibulin-2;Fbln2;ortholog
MOUSE|MGI=MGI=1096385|UniProtKB=Q61361	Bcan	Brevican core protein;Bcan;ortholog
MOUSE|MGI=MGI=108110|UniProtKB=P70663	Sparcl1	SPARC-like protein 1;Sparcl1;ortholog
MOUSE|MGI=MGI=98373|UniProtKB=P07214	Sparc	SPARC;Sparc;ortholog
MOUSE|MGI=MGI=106664|UniProtKB=O89103	Cd93	Complement component C1q receptor;Cd93;ortholog
MOUSE|MGI=MGI=1277201|UniProtKB=Q9R1N9	Col13a1	Collagen alpha-1(XIII) chain;Col13a1;ortholog
MOUSE|MGI=MGI=2137300|UniProtKB=Q9ESM3	Hapln2	Hyaluronan and proteoglycan link protein 2;Hapln2;ortholog
MOUSE|MGI=MGI=98941|UniProtKB=Q8CIZ8	Vwf	von Willebrand factor;Vwf;ortholog
MOUSE|MGI=MGI=88449|UniProtKB=O35206	Col15a1	Collagen alpha-1(XV) chain;Col15a1;ortholog
MOUSE|MGI=MGI=2444336|UniProtKB=E9Q0B5	Fcgbp	Fc fragment of IgG-binding protein;Fcgbp;ortholog
MOUSE|MGI=MGI=1328314|UniProtKB=O89029	Matn4	Matrilin-4;Matn4;ortholog
MOUSE|MGI=MGI=1861735|UniProtKB=Q9QYM9	Tmeff2	Tomoregulin-2;Tmeff2;ortholog
MOUSE|MGI=MGI=107536|UniProtKB=Q8K419	Lgals4	Galectin-4;Lgals4;ortholog
MOUSE|MGI=MGI=2685312|UniProtKB=Q2UY11	Col28a1	Collagen alpha-1(XXVIII) chain;Col28a1;ortholog
MOUSE|MGI=MGI=88453|UniProtKB=P08121	Col3a1	Collagen alpha-1(III) chain;Col3a1;ortholog
MOUSE|MGI=MGI=88467|UniProtKB=P11087	Col1a1	Collagen alpha-1(I) chain;Col1a1;ortholog
MOUSE|MGI=MGI=106591|UniProtKB=P51942	Matn1	Cartilage matrix protein;Matn1;ortholog
Calcium-binding protein (PC00060)
MOUSE|MGI=MGI=1298229|UniProtKB=O88322	Nid2	Nidogen-2;Nid2;ortholog
MOUSE|MGI=MGI=1915110|UniProtKB=Q9D708	S100a16	Protein S100-A16;S100a16;ortholog
MOUSE|MGI=MGI=88030|UniProtKB=P97429	Anxa4	Annexin A4;Anxa4;ortholog
MOUSE|MGI=MGI=1343098|UniProtKB=O70200	Aif1	Allograft inflammatory factor 1;Aif1;ortholog
MOUSE|MGI=MGI=1919598|UniProtKB=Q9EQX4	Aif1l	Allograft inflammatory factor 1-like;Aif1l;ortholog
MOUSE|MGI=MGI=1338917|UniProtKB=P56565	S100a1	Protein S100-A1;S100a1;ortholog
MOUSE|MGI=MGI=104528|UniProtKB=P97816	S100g	Protein S100-G;S100g;ortholog
MOUSE|MGI=MGI=97821|UniProtKB=P32848	Pvalb	Parvalbumin alpha;Pvalb;ortholog
MOUSE|MGI=MGI=88251|UniProtKB=P0DP26	Calm1	Calmodulin-1;Calm1;ortholog
MOUSE|MGI=MGI=98217|UniProtKB=P50114	S100b	Protein S100-B;S100b;ortholog
MOUSE|MGI=MGI=1922818|UniProtKB=Q6P8Y1	Capsl	Calcyphosin-like protein;Capsl;ortholog
MOUSE|MGI=MGI=88255|UniProtKB=P14824	Anxa6	Annexin A6;Anxa6;ortholog
MOUSE|MGI=MGI=1339467|UniProtKB=P14069	S100a6	Protein S100-A6;S100a6;ortholog
MOUSE|MGI=MGI=88031|UniProtKB=Q07076	Anxa7	Annexin A7;Anxa7;ortholog
MOUSE|MGI=MGI=1338849|UniProtKB=P62818	S100a3	Protein S100-A3;S100a3;ortholog
MOUSE|MGI=MGI=106504|UniProtKB=Q9D8Y0	Efhd2	EF-hand domain-containing protein D2;Efhd2;ortholog
MOUSE|MGI=MGI=1926017|UniProtKB=Q9D0E5	Efcab11	EF-hand calcium-binding domain-containing protein 11;Efcab11;ortholog
MOUSE|MGI=MGI=1921607|UniProtKB=Q9D4J1	Efhd1	EF-hand domain-containing protein D1;Efhd1;ortholog
MOUSE|MGI=MGI=1913416|UniProtKB=Q9D2Q8	S100a14	Protein S100-A14;S100a14;ortholog
MOUSE|MGI=MGI=3510999|UniProtKB=J3QMC7	S100a2	S100 calcium-binding protein A2;S100a2;ortholog
MOUSE|MGI=MGI=1330282|UniProtKB=P07091	S100a4	Protein S100-A4;S100a4;ortholog
MOUSE|MGI=MGI=109581|UniProtKB=P97352	S100a13	Protein S100-A13;S100a13;ortholog
MOUSE|MGI=MGI=106008|UniProtKB=P48036	Anxa5	Annexin A5;Anxa5;ortholog
Cell adhesion molecule (PC00069)
MOUSE|MGI=MGI=1928392|UniProtKB=Q9QZZ6	Dpt	Dermatopontin;Dpt;ortholog
MOUSE|MGI=MGI=96610|UniProtKB=P09055	Itgb1	Integrin beta-1;Itgb1;ortholog
MOUSE|MGI=MGI=88329|UniProtKB=Q64314	Cd34	Hematopoietic progenitor cell antigen CD34;Cd34;ortholog
MOUSE|MGI=MGI=1352751|UniProtKB=Q9JL89	Ninj2	Ninjurin-2;Ninj2;ortholog
MOUSE|MGI=MGI=96612|UniProtKB=O54890	Itgb3	Integrin beta-3;Itgb3;ortholog
MOUSE|MGI=MGI=103221|UniProtKB=P55292	Dsc2,Dsc3	Desmocollin-2;Dsc2;ortholog
MOUSE|MGI=MGI=96912|UniProtKB=P20917	Mag	Myelin-associated glycoprotein;Mag;ortholog
MOUSE|MGI=MGI=99959|UniProtKB=P82198	Tgfbi	Transforming growth factor-beta-induced protein ig-h3;Tgfbi;ortholog
MOUSE|MGI=MGI=2443256|UniProtKB=B7ZMQ6	Siglech	Sialic acid-binding Ig-like lectin H;Siglech;ortholog
MOUSE|MGI=MGI=98747|UniProtKB=P01831	Thy1	Thy-1 membrane glycoprotein;Thy1;ortholog
MOUSE|MGI=MGI=96616|UniProtKB=P26011	Itgb7	Integrin beta-7;Itgb7;ortholog
MOUSE|MGI=MGI=2443630|UniProtKB=Q80ZE3	Siglecg	Sialic acid-binding Ig-like lectin 10;Siglec10;ortholog
MOUSE|MGI=MGI=2681107|UniProtKB=Q920G3	Siglecf	Sialic acid-binding Ig-like lectin 5;Siglec5;ortholog
MOUSE|MGI=MGI=96613|UniProtKB=A2A863	Itgb4	Integrin beta-4;Itgb4;ortholog
MOUSE|MGI=MGI=1194993|UniProtKB=P55850	Dsc3	Desmocollin-3;Dsc3;ortholog
MOUSE|MGI=MGI=103190|UniProtKB=P19467	Muc13	Mucin-13;Muc13;ortholog
MOUSE|MGI=MGI=96617|UniProtKB=Q61735	Cd47	Leukocyte surface antigen CD47;Cd47;ortholog
MOUSE|MGI=MGI=1196617|UniProtKB=O70131	Ninj1	Ninjurin-1;Ninj1;ortholog
Translational protein (PC00263)
MOUSE|MGI=MGI=98037|UniProtKB=P62889	Rpl30	60S ribosomal protein L30;Rpl30;ortholog
MOUSE|MGI=MGI=1915191|UniProtKB=Q6ZWY3	Rps27l	40S ribosomal protein S27-like;Rps27l;ortholog
MOUSE|MGI=MGI=1933735|UniProtKB=Q8BGY2	Eif5a2	Eukaryotic translation initiation factor 5A-2;Eif5a2;ortholog
MOUSE|MGI=MGI=105922|UniProtKB=P47963	Rpl13	60S ribosomal protein L13;Rpl13;ortholog
MOUSE|MGI=MGI=1914921|UniProtKB=Q9JJI8	Rpl38	60S ribosomal protein L38;Rpl38;ortholog
MOUSE|MGI=MGI=98038|UniProtKB=P62911	Rpl32	60S ribosomal protein L32;Rpl32;ortholog
MOUSE|MGI=MGI=2137226|UniProtKB=Q9DCI9	Heg1	39S ribosomal protein L32, mitochondrial;Mrpl32;ortholog
MOUSE|MGI=MGI=1349430|UniProtKB=Q9Z0N2	Eif2s3y	Eukaryotic translation initiation factor 2 subunit 3, Y-linked;Eif2s3y;ortholog
MOUSE|MGI=MGI=1921398|UniProtKB=Q5SW19	Clu	Clustered mitochondria protein homolog;Cluh;ortholog
MOUSE|MGI=MGI=1196612|UniProtKB=O35972	Mrpl23	39S ribosomal protein L23, mitochondrial;Mrpl23;ortholog
MOUSE|MGI=MGI=1914142|UniProtKB=Q9DBB5	Eif4e3	Eukaryotic translation initiation factor 4E type 3;Eif4e3;ortholog
MOUSE|MGI=MGI=103267|UniProtKB=Q60876	Eif4ebp1	Eukaryotic translation initiation factor 4E-binding protein 1;Eif4ebp1;ortholog
MOUSE|MGI=MGI=1338046|UniProtKB=Q9D2R8	Mrps33	28S ribosomal protein S33, mitochondrial;Mrps33;ortholog
MOUSE|MGI=MGI=99687|UniProtKB=P47915	Rpl29	60S ribosomal protein L29;Rpl29;ortholog
MOUSE|MGI=MGI=1914498|UniProtKB=P62892	Rpl39	60S ribosomal protein L39;Rpl39;ortholog
MOUSE|MGI=MGI=2142075|UniProtKB=Q8BGV0	Synm	Probable asparagine--tRNA ligase, mitochondrial;Nars2;ortholog
MOUSE|MGI=MGI=1934754|UniProtKB=Q99MN1	Syk	Lysine--tRNA ligase;Kars;ortholog
Transfer/carrier protein (PC00219)
MOUSE|MGI=MGI=3583950|UniProtKB=B1AQP7	Apol7b	Apolipoprotein L 7b;Apol7b;ortholog
MOUSE|MGI=MGI=98254|UniProtKB=P32020	Scp2	Non-specific lipid-transfer protein;Scp2;ortholog
MOUSE|MGI=MGI=94865|UniProtKB=P31786	Dbi	Acyl-CoA-binding protein;Dbi;ortholog
MOUSE|MGI=MGI=102668|UniProtKB=Q62472	Lcn4	Vomeronasal secretory protein 2;Lcn4;ortholog
MOUSE|MGI=MGI=88053|UniProtKB=P34928	Apoc1	Apolipoprotein C-I;Apoc1;ortholog
MOUSE|MGI=MGI=95762|UniProtKB=Q60648	Gm2a	Ganglioside GM2 activator;Gm2a;ortholog
MOUSE|MGI=MGI=1929480|UniProtKB=Q7TQH7	Lrp10	Low-density lipoprotein receptor-related protein 10;Lrp10;ortholog
MOUSE|MGI=MGI=2685921|UniProtKB=E9Q0X2	Apold1	Apolipoprotein L domain-containing 1;Apold1;ortholog
MOUSE|MGI=MGI=97930|UniProtKB=Q9Z275	Rlbp1	Retinaldehyde-binding protein 1;Rlbp1;ortholog
MOUSE|MGI=MGI=88056|UniProtKB=P51910	Apod	Apolipoprotein D;Apod;ortholog
MOUSE|MGI=MGI=1346518|UniProtKB=Q9ERN0	Scamp2	Secretory carrier-associated membrane protein 2;Scamp2;ortholog
MOUSE|MGI=MGI=108039|UniProtKB=O09035	Dbil5	Diazepam-binding inhibitor-like 5;Dbil5;ortholog
MOUSE|MGI=MGI=1333806|UniProtKB=P56394	Cox17	Cytochrome c oxidase copper chaperone;Cox17;ortholog
MOUSE|MGI=MGI=1354168|UniProtKB=Q8BWP5	Ttpa	Alpha-tocopherol transfer protein;Ttpa;ortholog
MOUSE|MGI=MGI=2684955|UniProtKB=A2BHR2	Lcn11	Lipocalin 11;Lcn11;ortholog
MOUSE|MGI=MGI=1929253|UniProtKB=Q9JL62	Gltp	Glycolipid transfer protein;Gltp;ortholog
Cell junction protein (PC00070)
MOUSE|MGI=MGI=2385067|UniProtKB=Q91XD2	Lims2	LIM and senescent cell antigen-like-containing domain protein 2;Lims2;ortholog
MOUSE|MGI=MGI=1860425|UniProtKB=Q9Z0S3	Cldn14	Claudin-14;Cldn14;ortholog
MOUSE|MGI=MGI=95713|UniProtKB=P23242	Gja1	Gap junction alpha-1 protein;Gja1;ortholog
MOUSE|MGI=MGI=1195263|UniProtKB=Q99JW4	Lims1	LIM and senescent cell antigen-like-containing domain protein 1;Lims1;ortholog
MOUSE|MGI=MGI=95719|UniProtKB=P28230	Gjb1	Gap junction beta-1 protein;Gjb1;ortholog
MOUSE|MGI=MGI=106925|UniProtKB=Q60771	Cldn11	Claudin-11;Cldn11;ortholog
MOUSE|MGI=MGI=1920597|UniProtKB=Q9D9N2	Cldn34b2	Claudin 34B2;Cldn34b2;ortholog
MOUSE|MGI=MGI=95720|UniProtKB=Q00977	Gjb2	Gap junction beta-2 protein;Gjb2;ortholog
MOUSE|MGI=MGI=1276112|UniProtKB=O54942	Cldn5	Claudin-5;Cldn5;ortholog
MOUSE|MGI=MGI=1920311|UniProtKB=Q8K193	Cldn34c1	Claudin 34C1;Cldn34c1;ortholog
MOUSE|MGI=MGI=2153041|UniProtKB=Q921C1	Gjc3	Gap junction gamma-3 protein;Gjc3;ortholog
MOUSE|MGI=MGI=1341872|UniProtKB=Q9Z0U1	Tjp2	Tight junction protein ZO-2;Tjp2;ortholog
MOUSE|MGI=MGI=107588|UniProtKB=P70689	Gjb6	Gap junction beta-6 protein;Gjb6;ortholog
MOUSE|MGI=MGI=1276109|UniProtKB=O88551	Cldn1	Claudin-1;Cldn1;ortholog
MOUSE|MGI=MGI=2153060|UniProtKB=Q8BQU6	Gjc2	Gap junction gamma-2 protein;Gjc2;ortholog
Chromatin/chromatin-binding, or -regulatory protein (PC00077)
MOUSE|MGI=MGI=96136|UniProtKB=P09602	Hmgn2	Non-histone chromosomal protein HMG-17;Hmgn2;ortholog
MOUSE|MGI=MGI=1351331|UniProtKB=Q9QWF0	Chaf1a	Chromatin assembly factor 1 subunit A;Chaf1a;ortholog
MOUSE|MGI=MGI=1933281|UniProtKB=Q9CUU3	Scp2	Synaptonemal complex protein 2;Sycp2;ortholog
MOUSE|MGI=MGI=1927664|UniProtKB=Q8VDQ8	Sirt2	NAD-dependent protein deacetylase sirtuin-2;Sirt2;ortholog
MOUSE|MGI=MGI=2138069|UniProtKB=Q9DCB1	Hmgn3	High mobility group nucleosome-binding domain-containing protein 3;Hmgn3;ortholog
MOUSE|MGI=MGI=96223|UniProtKB=Q61645	Hr	Lysine-specific demethylase hairless;Hr;ortholog
MOUSE|MGI=MGI=1914179|UniProtKB=Q9DAP7	Asf1b	Histone chaperone ASF1B;Asf1b;ortholog
MOUSE|MGI=MGI=1277978|UniProtKB=O55128	Sap18	Histone deacetylase complex subunit SAP18;Sap18;ortholog
MOUSE|MGI=MGI=1914878|UniProtKB=Q9EST5	Anp32b	Acidic leucine-rich nuclear phosphoprotein 32 family member B;Anp32b;ortholog
MOUSE|MGI=MGI=1923505|UniProtKB=Q3UK78	Pcgf5	Polycomb group RING finger protein 5;Pcgf5;ortholog
Structural protein (PC00211)
MOUSE|MGI=MGI=107672|UniProtKB=P35803	Gpm6b	Neuronal membrane glycoprotein M6-b;Gpm6b;ortholog
MOUSE|MGI=MGI=1918943|UniProtKB=Q3SXB8	Colec11	Collectin-11;Colec11;ortholog
MOUSE|MGI=MGI=109517|UniProtKB=P21841	Sftpc	Pulmonary surfactant-associated protein C;Sftpc;ortholog
MOUSE|MGI=MGI=107933|UniProtKB=Q61884	Mns1	Meiosis-specific nuclear structural protein 1;Mns1;ortholog
MOUSE|MGI=MGI=108511|UniProtKB=Q9D2P8	Mobp	Myelin-associated oligodendrocyte basic protein;Mobp;ortholog
MOUSE|MGI=MGI=1914877|UniProtKB=Q8BK62	Olfml3	Olfactomedin-like protein 3;Olfml3;ortholog
MOUSE|MGI=MGI=1917363|UniProtKB=Q5M8M2	Odf3b	Outer dense fiber protein 3B;Odf3b;ortholog
MOUSE|MGI=MGI=97623|UniProtKB=P60202	Plp1	Myelin proteolipid protein;Plp1;ortholog
MOUSE|MGI=MGI=2679264|UniProtKB=Q8BSH2	Olfml1	Olfactomedin-like 1;Olfml1;ortholog
MOUSE|MGI=MGI=2443310|UniProtKB=Q3V1G4	Olfml2b	Olfactomedin-like protein 2B;Olfml2b;ortholog
Chaperone (PC00072)
MOUSE|MGI=MGI=107472|UniProtKB=P52194	Clgn	Calmegin;Clgn;ortholog
MOUSE|MGI=MGI=2442720|UniProtKB=Q8BH02	Tor4a	Torsin-4A;Tor4a;ortholog
MOUSE|MGI=MGI=95541|UniProtKB=P26883	Fkbp1a	Peptidyl-prolyl cis-trans isomerase FKBP1A;Fkbp1a;ortholog
MOUSE|MGI=MGI=1920566|UniProtKB=Q9D9Q6	Calr3	Calreticulin-3;Calr3;ortholog
MOUSE|MGI=MGI=1922847|UniProtKB=Q59J78	Ndufaf2	NADH dehydrogenase [ubiquinone] 1 alpha subcomplex assembly factor 2;Ndufaf2;ortholog
MOUSE|MGI=MGI=92638|UniProtKB=Q9Z1W5	Serp1	Stress-associated endoplasmic reticulum protein 1;Serp1;ortholog
MOUSE|MGI=MGI=1353652|UniProtKB=Q9ER38	Tor3a	Torsin-3A;Tor3a;ortholog
Storage protein (PC00210)
MOUSE|MGI=MGI=95588|UniProtKB=P09528	Fth1	Ferritin heavy chain;Fth1;ortholog
