# Supplementary material for: Control of spinal motor neuron terminal differentiation through sustained Hoxc8 gene activity
Source: eLife. 2022 Mar 22;11:e70766. doi: 10.7554/eLife.70766 (PMC8940177; doi:10.7554/eLife.70766)
Supplement: Supplementary file 3. [file elife-70766-supp3.xlsx]

## Sheet: Sheet1
	RefSeq	Gene name	Base mean	log2(FC)	StdErr	Wald-Stats	P-value	Fold change
Downregulated genes	NM_009063	Rgs5	219.177	0.377078	0.0832981	4.52685	5.98696e-06	1.29871
	NM_054042	Cd248	112.636	0.321655	0.073441	4.37978	1.18802e-05	1.24976
	NM_010591	Jun	5062.07	0.255033	0.070401	3.62258	0.000291681	1.19336		previously known Hoxc8 targets in brachial motor neurons
	NM_177688	H2afj	426.091	0.234775	0.0798495	2.94022	0.00327975	1.17672
	NM_023061	Mcam	289.473	0.23228	0.0835278	2.78087	0.00542135	1.17469		new Hoxc8 targets in brachial motor neurons
	NM_139001	Cspg4	101.723	0.221294	0.0742849	2.97899	0.00289205	1.16578
	NM_001033228	Itga1	64.4424	0.214714	0.0711228	3.01892	0.00253682	1.16047		Genes unaffected in brachial MNs of Hoxc8 MN Delta early mice
	NM_013905	Heyl	145.841	0.211518	0.0740078	2.85805	0.00426258	1.15791
	NM_028055	Btbd17	186.179	0.210777	0.083527	2.52346	0.0116207	1.15731		Genes with no convincing expression in brachial MNs of wild-type mice
	NM_008595	Mfng	183.225	0.209603	0.0821285	2.55213	0.0107066	1.15637
	NM_008416	Junb	365.101	0.203882	0.081382	2.50525	0.0122364	1.15179
	NM_175522	Elfn1	436.76	0.203576	0.0812042	2.50696	0.0121774	1.15155
	NM_007913	Egr1	1509.16	0.203048	0.0802018	2.53172	0.0113506	1.15113
	NM_008130	Gli3	183.853	0.201949	0.0815695	2.47579	0.0132942	1.15025
	NM_010137	Epas1	110.489	0.201259	0.0757803	2.65582	0.00791166	1.1497
	NM_010153	Erbb3	87.0588	0.192337	0.0730676	2.63232	0.00848031	1.14261
	NM_033594	Pcdhga11	775.035	0.191737	0.0805607	2.38003	0.0173113	1.14214
	NM_007542	Bgn	258.029	0.190482	0.0737801	2.58176	0.00982985	1.14115
	NM_007631	Ccnd1	1037.05	0.184898	0.0732575	2.52394	0.0116048	1.13674
	NM_028283	Uaca	364.023	0.184885	0.0784127	2.35785	0.0183811	1.13673
	NM_010419	Hes5	333.985	0.183982	0.0828948	2.21946	0.0264552	1.13602
	NM_001252193	Amz2	100.782	0.181875	0.0799024	2.27622	0.022833	1.13436
	NM_022410	Myh9	1284.27	0.180816	0.0799435	2.2618	0.0237098	1.13352
	NM_001001185	BC048507	203.738	0.179387	0.0834777	2.14892	0.031641	1.1324
	NM_016889	Insm1	396.904	0.177802	0.0821045	2.16555	0.0303452	1.13116
	NM_001176528	Rara	197.221	0.177535	0.0829949	2.13911	0.032427	1.13095
	NM_080419	Igsf8	1892.33	0.176124	0.0693577	2.53936	0.0111055	1.12984
	NM_001109914	Apold1	70.3646	0.174421	0.0669501	2.60524	0.00918093	1.12851
	NM_001081338	L3mbtl1	33.2007	0.174188	0.0619274	2.81278	0.00491159	1.12833
	NM_010736	Ltbr	276.031	0.172117	0.0827067	2.08106	0.0374288	1.12671
	NM_177003	Tigar	776.481	0.171055	0.0717589	2.38374	0.0171377	1.12588
	NM_001081151	Gan	263.207	0.171016	0.0835229	2.04754	0.0406056	1.12585
	NM_172706	9330182L06Rik	661.652	0.168914	0.0808322	2.08969	0.0366456	1.12421
	NM_008272	Hoxc9	1363.05	0.168365	0.0834544	2.01745	0.0436487	1.12378
	NM_009573	Zic1	504.005	0.167256	0.0805047	2.07759	0.0377468	1.12292
	NM_025509	Ostc	785.121	0.166489	0.0733053	2.27118	0.0231363	1.12232
	NM_172508	Dse	150.542	0.166067	0.077191	2.15138	0.0314463	1.122
	NM_026281	Tm7sf3	511.784	0.163897	0.0790028	2.07457	0.0380268	1.12031
	NM_007910	Efna4	129.303	0.163289	0.0768057	2.12601	0.0335028	1.11984
	NM_176953	Lig4	471.874	0.160534	0.0807096	1.98903	0.0466982	1.1177
	NM_007866	Dll3	863.431	0.159887	0.074627	2.14249	0.0321541	1.1172
	NM_001033341	Zfp407	1046.48	0.15892	0.0716959	2.21659	0.0266513	1.11645
	NM_177613	Cdc34	979.284	0.157575	0.0726188	2.16989	0.0300149	1.11541
	NM_010246	Fzd9	106.239	0.154507	0.0771041	2.00387	0.0450841	1.11304
	NM_177030	Dock6	280.572	0.1543	0.077589	1.98869	0.0467359	1.11288
	NM_016967	Olig2	76.3996	0.153936	0.0765727	2.01033	0.0443965	1.1126
	NM_144860	Mib1	2758.03	0.152582	0.0713957	2.13714	0.0325869	1.11156
	NM_026376	Plxnd1	195.753	0.151237	0.07025	2.15284	0.0313314	1.11052
	NM_010280	Gfra3	240.091	0.150766	0.0835246	1.80505	0.0710666	1.11016
	NM_008239	Foxq1	37.0032	0.145969	0.0575491	2.53643	0.0111988	1.10647
	NM_007936	Epha4	4696.54	0.14566	0.0615551	2.36634	0.0179649	1.10624
	NM_001013368	E2f8	58.2551	0.145289	0.0690435	2.10432	0.0353507	1.10595
	NM_010272	Gdf11	2137.08	0.14466	0.0624587	2.31608	0.0205538	1.10547
	NM_145465	Stk24	918.534	0.144261	0.0704577	2.04748	0.0406105	1.10516
	NM_025828	Lman2	1735.57	0.14376	0.0624891	2.30056	0.0214164	1.10478
	NM_011784	Aplnr	24.8585	0.143033	0.0508799	2.8112	0.00493578	1.10422
	NM_024257	Hdhd3	58.6623	0.140658	0.0682937	2.0596	0.0394364	1.10241
	NM_007865	Dll1	1390.89	0.140172	0.0680518	2.05979	0.039419	1.10204
	NM_026303	Alkbh8	966.956	0.139538	0.0691065	2.01917	0.0434691	1.10155
	NM_001327821	Creb5	88.8992	0.138115	0.0638263	2.16392	0.0304702	1.10047
	NM_172871	Klhl9	3405.99	0.137767	0.0646273	2.13172	0.0330298	1.1002
	NM_026718	Ankrd13a	3229.86	0.137163	0.062811	2.18374	0.0289816	1.09974
	NM_019444	Ramp2	32.0434	0.135861	0.0588082	2.31023	0.0208752	1.09875
	NM_010612	Kdr	85.8745	0.13047	0.061599	2.11805	0.0341705	1.09465
	NM_010302	Gna12	1825.85	0.130051	0.0617707	2.10539	0.0352576	1.09433
	NM_019413	Robo1	10300.8	0.127733	0.0536112	2.38258	0.017192	1.09258
	NM_172872	Kank4	53.2972	0.12673	0.0536438	2.36243	0.0181556	1.09182
	NM_021301	Slc15a2	79.5368	0.121152	0.0594907	2.03649	0.0417014	1.0876
	NR_028300	Dubr	45.0775	0.120076	0.0543743	2.20832	0.0272217	1.08679
	NM_199018	Stard8	40.7132	0.118625	0.057884	2.04935	0.0404279	1.0857
	NM_008609	Mmp15	3586.2	0.116618	0.0564876	2.06449	0.0389716	1.08419
	NM_011803	Klf6	1767.67	0.107729	0.0835149	1.28994	0.197071	1.07753
	NM_001004157	Scarf1	19.8563	0.101703	0.0498314	2.04094	0.0412569	1.07304
	NM_010466	Hoxc8	19301.2	0.101464	0.0806892	1.25746	0.208586	1.07286
	NM_001098789	Ndufa4l2	24.1293	0.101134	0.0510274	1.98195	0.0474844	1.07262
	NM_007607	Car4	13.6599	0.0995538	0.0440621	2.2594	0.0238587	1.07144
	NR_131207	Gm35612	16.579	0.0938649	0.0442707	2.12025	0.0339851	1.06723
	NM_018826	Irx5	274.607	0.0833674	0.0736125	1.13252	0.257417	1.05949
	NM_080435	Adcy4	11.9146	0.0791821	0.0373026	2.12269	0.0337796	1.05642
	NM_013508	Elk3	8.24322	0.0703891	0.0340676	2.06616	0.0388136	1.05
	NM_178901	AI467606	8.07491	0.0688152	0.0346368	1.98677	0.0469483	1.04885
	NR_003623	Gm5069	7.86046	0.0660131	0.032994	2.00076	0.0454182	1.04682
	NM_001171003	Mgam	5.53606	0.0605776	0.0299837	2.02035	0.043347	1.04288
	NM_026601	Hyi	6.30768	0.0576422	0.028384	2.0308	0.0422756	1.04076
	NM_001081263	Slc44a5	452.053	0.13384	0.0797922	1.67736	0.0934727	1.09721
	NM_019781	Pex14	954.975	0.103253	0.0728681	1.41699	0.156487	1.07419
	NM_021362	Pappa	102.924	0.0318836	0.0304927	1.04561	0.29574	1.02235
	NM_133791	Wwc2	577.198	0.0850417	0.0832341	1.02172	0.306915	1.06072
	NM_001080780	Ret	219.173	0.0367335	0.0438103	0.838466	0.401769	1.02579
	NM_153105	Cldn19	5.12758	0.0213659	0.0276864	0.771712	0.440285	1.01492
	NM_178591	Nrg1	534.831	0.0313768	0.0420115	0.746862	0.455147	1.02199
	NM_009154	Sema5a	1497.66	0.049835	0.0697055	0.714936	0.474649	1.03515
	NM_183427	Glra2	1692.9	0.0539681	0.0791011	0.682267	0.49507	1.03812
	NM_178598	Tagln2	699.322	0.0281926	0.0459397	0.613686	0.539423	1.01973
	NM_033217	Ngfr	7020.84	0.0399705	0.0671248	0.595466	0.551532	1.02809
	NM_017461	Septin1	56.8534	0.0363297	0.0680812	0.533623	0.593602	1.0255																										Slc10a4	Slc10a4	Slc10a4	Slc10a4	Slc10a4	Slc10a4	Slc10a4	Slc10a4	Slc10a4	Slc10a4	Slc10a4	Slc10a4	Slc10a4	Slc10a4	Slc10a4	Slc10a4
Upregulated genes	NM_001190179	Nup35	3.79739	-0.0433873	0.0221008	-1.96315	0.0496284	0.970374
	NR_028551	Snord53	9.47221	-0.0753311	0.035034	-2.15023	0.031537	0.949124
	NM_145608	Map3k21	8.73507	-0.0811919	0.0327233	-2.48116	0.0130955	0.945276
	NM_001305677	Usf1	12.9892	-0.0848426	0.0418191	-2.0288	0.0424785	0.942887
	NR_029814	Mir124a-2	9.47701	-0.0855405	0.0369765	-2.31337	0.0207021	0.942431
	NR_033560	Arhgap20os	15.0692	-0.090673	0.0459162	-1.97475	0.0482963	0.939085
	NM_011563	Prdx2	9.6876	-0.0914316	0.034751	-2.63105	0.00851219	0.938591
	NM_001346585	Arhgap24	25.7406	-0.105475	0.0527881	-1.99808	0.0457081	0.929499
	NM_001177371	Dbn1	39.1983	-0.108019	0.0546174	-1.97774	0.0479582	0.927861
	NM_001316695	Ica1l	30.6823	-0.119706	0.0609288	-1.9647	0.0494495	0.920375
	NM_053253	Zmynd10	36.9291	-0.122112	0.0601061	-2.0316	0.042194	0.918842
	NR_075074	Dnm1l	41.2373	-0.135707	0.0651363	-2.08343	0.0372119	0.910224
	NM_144546	Zfp119a	61.379	-0.136742	0.0696433	-1.96346	0.0495927	0.909571
	NM_198885	Scx	47.6545	-0.137616	0.0674724	-2.03958	0.0413921	0.90902
	NR_040414	Gm12504	51.1228	-0.138788	0.0668255	-2.07687	0.037814	0.908282
	NM_007586	Calb2	90.6337	-0.140468	0.0624494	-2.24931	0.0244928	0.907225
	NM_029926	Irak4	36.8057	-0.144599	0.0618773	-2.33687	0.0194458	0.904631
	NM_015743	Nr4a3	172.484	-0.146166	0.074239	-1.96885	0.04897	0.903649
	NR_131247	Limk1	65.3408	-0.146306	0.0716978	-2.04059	0.0412915	0.903561
	NM_001101483	Slc35g2	88.5435	-0.15353	0.0783054	-1.96066	0.0499183	0.899048
	NM_001081333	Plekhg4	177.603	-0.15775	0.0796015	-1.98175	0.0475073	0.896422
	NM_033588	Pcdhga5	471.391	-0.160703	0.0800824	-2.00672	0.0447795	0.894589
	NM_025315	Med21	237.537	-0.162821	0.0831378	-1.95845	0.0501777	0.893277
	NM_023624	Lrat	18.5222	-0.163744	0.0495522	-3.30448	0.000951532	0.892705
	NM_172785	Zc3h12d	51.5986	-0.16385	0.054745	-2.99297	0.0027628	0.89264
	NM_008949	Psmc3ip	183.003	-0.164162	0.0767522	-2.13885	0.0324474	0.892447
	NM_177774	Srsf12	547.148	-0.164189	0.0769716	-2.13312	0.0329151	0.89243
	NR_104468	Hnrnpa2b1	296.184	-0.165259	0.0829684	-1.99183	0.0463892	0.891768
	NM_001115075	H2-M5	101.58	-0.165981	0.071342	-2.32656	0.0199888	0.891322
	NR_037906	Luc7l	328.694	-0.169128	0.0830736	-2.03589	0.0417618	0.88938
	NM_008779	Cntn3	344.911	-0.170168	0.0833883	-2.04067	0.0412833	0.888739
	NR_015351	Ipw	474.924	-0.171594	0.0832276	-2.06175	0.0392319	0.887861
	NR_110345	Adarb2	243.595	-0.171659	0.0834993	-2.05582	0.0397999	0.887821
	NM_178142	Lcorl	568.092	-0.173805	0.0831728	-2.08968	0.0366462	0.886502
	NM_027356	Ufsp1	136.136	-0.17435	0.0775513	-2.24819	0.0245639	0.886166
	NR_028405	Marcksl1-ps4	44.7707	-0.175186	0.0646896	-2.7081	0.00676706	0.885654
	NM_001123038	Eif4a2	535.074	-0.178699	0.0787102	-2.27035	0.0231866	0.883499
	NM_175194	Slc25a16	302.147	-0.178865	0.0820285	-2.18053	0.0292184	0.883398
	NM_027134	Mtfmt	217.359	-0.17908	0.0832757	-2.15045	0.03152	0.883266
	NM_010531	Il18bp	209.886	-0.17946	0.0834328	-2.15095	0.0314798	0.883033
	NR_015498	1500004A13Rik	548.561	-0.179888	0.0781501	-2.30183	0.021345	0.882772
	NM_001081270	Dscaml1	434.279	-0.181269	0.079801	-2.27151	0.0231162	0.881927
	NM_001166658	Cdr1	115.788	-0.181547	0.0785993	-2.30978	0.0209002	0.881757
	NM_199021	Dpp10	540.869	-0.183091	0.0835281	-2.19197	0.0283816	0.880814
	NM_001100110	Srp54c	135.79	-0.184682	0.0814521	-2.26737	0.0233676	0.879843
	NM_145147	Gtpbp6	244.654	-0.188768	0.0829236	-2.27641	0.0228213	0.877354
	NR_033219	BC020402	77.4172	-0.196447	0.0756929	-2.59532	0.00945018	0.872697
	NM_201367	Gpr176	198.814	-0.197669	0.0832143	-2.37543	0.0175286	0.871958
	NM_001347332	Pisd	48.1931	-0.203399	0.066845	-3.04285	0.00234353	0.868502
	NM_172733	Dera	244.432	-0.21607	0.0832265	-2.59617	0.00942686	0.860907
	NM_013509	Eno2	316.441	-0.220295	0.0834434	-2.64005	0.00828927	0.85839
	NM_028980	Ppp4r4	152.082	-0.221196	0.0825077	-2.68092	0.00734203	0.857854
	NR_003568	Gpr137b-ps	115.849	-0.335517	0.0726044	-4.62116	3.81602e-06	0.7925
	NM_026812	Hddc3	320.797	-0.351428	0.0808173	-4.34842	1.37119e-05	0.783808
	NR_003519	Pisd-ps2	335.698	-0.423898	0.0829005	-5.11334	3.16518e-07	0.745408
[truncated: 5,000 more columns]
