# Supplementary material for: Control of spinal motor neuron terminal differentiation through sustained Hoxc8 gene activity
Source: eLife. 2022 Mar 22;11:e70766. doi: 10.7554/eLife.70766 (PMC8940177; doi:10.7554/eLife.70766)
Supplement: Supplementary file 4. [file elife-70766-supp4.xlsx]

## Sheet: Sheet1
Olig2-Cre; Hoxc8 fl/fl
Genotype	Observed (N)	Observed (%)	Expected
Hoxc8 fl/fl	39	65	50
Olig2Cre+; Hoxc8 fl/fl	21	35	50
Total	60	100	100
ChAT-IRES-Cre; Hoxc8 fl/fl
Genotype	Observed (N)	Observed (%)	Expected (%)
Hoxc8 fl/fl	16	44.4444	50
ChAT-IRES-Cre+; Hoxc8 fl/fl	20	55.5556	50
Total	36	100	100
